# Supplementary material for: The ubiquitin ligase KBTBD8 regulates PKM1 levels via Erk1/2 and Aurora A to ensure oocyte quality
Source: Aging (Albany NY). 2019 Feb 20;11(4):1110–28. doi: 10.18632/aging.101802 (PMC6402520; doi:10.18632/aging.101802)
Supplement: Supplementary Dataset 1 [file aging-11-101802-s002.xls]

## Sheet: KBTBD8 DE vs control-down
Gene ID	IgG FPKM	K8 FPKM	log2(K8/IgG)	FDR(IgG-vs-K8)	Pvalue(IgG-vs-K8)	Other Gene ID	GO	Kegg Orthology
621832	4.44	0	-8.79442	5.36713e-30	5.20634e-31	Nutf2-ps2		K14285//NTF2-related export protein 1/2+ko03013//RNA transport+ko03015//mRNA surveillance pathway+ko03008//Ribosome biogenesis in eukaryotes+ko05164//Influenza A
BGI_novel_G000333	4.41	0	-8.78463	2.56653e-87	7.44626e-89	BGI_novel_G000333		K13886//coronin-1B/1C/6
193043	3.02	0	-8.2384	6.31146e-60	2.9139e-61	Zfp3	GO:0050794//regulation of cellular process;GO:0006807//nitrogen compound metabolic process;GO:0006351//transcription, DNA-templated;GO:0071704//organic substance metabolic process;GO:2000112//regulation of cellular macromolecule biosynthetic process;GO:0009059//macromolecule biosynthetic process;GO:0044249//cellular biosynthetic process;GO:0044238//primary metabolic process;GO:0090304//nucleic ac…	K09228//KRAB domain-containing zinc finger protein
BGI_novel_G000299	2.74	0	-8.09803	5.23513e-52	2.77358e-53	BGI_novel_G000299		K15182//negative elongation factor E
BGI_novel_G000051	2.58	0	-8.01123	5.60656e-55	2.82538e-56	BGI_novel_G000051	GO:0032787//monocarboxylic acid metabolic process;GO:0044248//cellular catabolic process;GO:0008152//metabolic process;GO:0044242//cellular lipid catabolic process;GO:0043436//oxoacid metabolic process;GO:0046503//glycerolipid catabolic process;GO:0009056//catabolic process;GO:0019752//carboxylic acid metabolic process;GO:0016042//lipid catabolic process;GO:0071704//organic substance metabolic pr…	K08869//aarF domain-containing kinase
BGI_novel_G000328	2.5	0	-7.96578	1.55368e-19	2.26266e-20	BGI_novel_G000328	GO:0032501//multicellular organismal process;GO:0006950//response to stress;GO:0008152//metabolic process;GO:0051771//negative regulation of nitric-oxide synthase biosynthetic process;GO:0001817//regulation of cytokine production;GO:0043549//regulation of kinase activity;GO:0008283//cell proliferation;GO:0010563//negative regulation of phosphorus metabolic process;GO:0050789//regulation of biolog…	K00799//glutathione S-transferase [EC:2.5.1.18]+ko00980//Metabolism of xenobiotics by cytochrome P450+ko00982//Drug metabolism - cytochrome P450+ko00983//Drug metabolism - other enzymes+ko05225//Hepatocellular carcinoma+ko01524//Platinum drug resistance+ko05418//Fluid shear stress and atherosclerosis+ko00480//Glutathione metabolism+ko05200//Pathways in cancer+ko05204//Chemical carcinogenesis
BGI_novel_G000070	2.13	0	-7.73471	2.49708e-14	4.71696e-15	BGI_novel_G000070	GO:0000003//reproduction;GO:0009987//cellular process;GO:0007049//cell cycle;GO:0051321//meiotic cell cycle;GO:0022414//reproductive process;GO:0043227//membrane-bounded organelle;GO:0005623//cell;GO:0000800//lateral element;GO:0044446//intracellular organelle part;GO:0043228//non-membrane-bounded organelle;GO:0044454//nuclear chromosome part;GO:0031974//membrane-enclosed lumen;GO:0005634//nucleu…	K19528//synaptonemal complex protein 3+ko03440//Homologous recombination
70419	1.8	0	-7.49185	5.57432e-31	5.23856e-32	2810408A11Rik	GO:0031323//regulation of cellular metabolic process;GO:0009966//regulation of signal transduction;GO:0019222//regulation of metabolic process;GO:0019220//regulation of phosphate metabolic process;GO:0050789//regulation of biological process;GO:0010646//regulation of cell communication;GO:0048583//regulation of response to stimulus;GO:0043666//regulation of phosphoprotein phosphatase activity;GO:…	K16833//protein phosphatase inhibitor 2;K16833//protein phosphatase inhibitor 2
BGI_novel_G000413	1.29	0	-7.01123	5.22003e-05	2.06266e-05	BGI_novel_G000413	GO:0006811//ion transport;GO:0008645//hexose transport;GO:0071702//organic substance transport;GO:0006812//cation transport;GO:0035428//hexose transmembrane transport;GO:1904659//glucose transmembrane transport;GO:0055085//transmembrane transport;GO:0008643//carbohydrate transport;GO:0034219//carbohydrate transmembrane transport;GO:0051234//establishment of localization;GO:0051179//localization;G…	K14384//solute carrier family 5 (low affinity sodium-glucose cotransporter), member 4
BGI_novel_G000154	1.19	0	-6.89482	3.51713e-66	1.40641e-67	BGI_novel_G000154		K14697//solute carrier family 30 (zinc transporter), member 10
69590	1.17	0	-6.87036	2.18292e-12	4.6591e-13	Gpx8	GO:0006950//response to stress;GO:0006979//response to oxidative stress;GO:0050896//response to stimulus;GO:0016021//integral component of membrane;GO:0031224//intrinsic component of membrane;GO:0044425//membrane part;GO:0016020//membrane;GO:0004602//glutathione peroxidase activity;GO:0003824//catalytic activity;GO:0016684//oxidoreductase activity, acting on peroxide as acceptor;GO:0016209//antio…	K00432//glutathione peroxidase [EC:1.11.1.9]+ko04918//Thyroid hormone synthesis+ko00590//Arachidonic acid metabolism+ko00480//Glutathione metabolism
56520	0.95	0	-6.56986	7.66536e-09	2.1142e-09	Nme4	GO:0006164//purine nucleotide biosynthetic process;GO:0006183//GTP biosynthetic process;GO:0071704//organic substance metabolic process;GO:0051234//establishment of localization;GO:0009147//pyrimidine nucleoside triphosphate metabolic process;GO:0009141//nucleoside triphosphate metabolic process;GO:0006725//cellular aromatic compound metabolic process;GO:0072521//purine-containing compound metabo…	K00940//nucleoside-diphosphate kinase [EC:2.7.4.6]+ko00983//Drug metabolism - other enzymes+ko00230//Purine metabolism+ko00240//Pyrimidine metabolism+ko01100//Metabolic pathways
231130	0.91	0	-6.50779	1.55435e-19	2.26266e-20	Tnip2	GO:0006139//nucleobase-containing compound metabolic process;GO:0043123//positive regulation of I-kappaB kinase/NF-kappaB signaling;GO:0002224//toll-like receptor signaling pathway;GO:0051707//response to other organism;GO:2000351//regulation of endothelial cell apoptotic process;GO:0006357//regulation of transcription from RNA polymerase II promoter;GO:0009967//positive regulation of signal tran…	K16456//centrosomal protein CEP55;K10352//myosin heavy chain+ko04530//Tight junction
101202	0.89	0	-6.47573	7.71197e-21	1.05891e-21	Hepacam2	GO:0022402//cell cycle process;GO:0007017//microtubule-based process;GO:0007049//cell cycle;GO:0009987//cellular process;GO:0006996//organelle organization;GO:0051301//cell division;GO:0016043//cellular component organization;GO:0007098//centrosome cycle;GO:0000226//microtubule cytoskeleton organization;GO:0031023//microtubule organizing center organization;GO:0007010//cytoskeleton organization;G…	K06499//carcinoembryonic antigen-related cell adhesion molecule
BGI_novel_G000711	0.86	0	-6.42626	4.2986e-11	9.9555e-12	BGI_novel_G000711		K09228//KRAB domain-containing zinc finger protein
66222	0.82	0	-6.35755	1.03927e-12	2.16702e-13	Serpinb1a	GO:0019222//regulation of metabolic process;GO:0060255//regulation of macromolecule metabolic process;GO:0009894//regulation of catabolic process;GO:0051246//regulation of protein metabolic process;GO:0050789//regulation of biological process;GO:0051171//regulation of nitrogen compound metabolic process;GO:0065007//biological regulation;GO:0080090//regulation of primary metabolic process;GO:00421…	K13963//serpin B+ko05146//Amoebiasis
78806	0.82	0.01	-6.35755	2.07765e-17	3.3494e-18	Stpg1	GO:0042981//regulation of apoptotic process;GO:0051234//establishment of localization;GO:0065009//regulation of molecular function;GO:0010941//regulation of cell death;GO:0008219//cell death;GO:0050789//regulation of biological process;GO:0090559//regulation of membrane permeability;GO:0065007//biological regulation;GO:0006810//transport;GO:0051098//regulation of binding;GO:0048522//positive regu…
14411	0.78	0	-6.2854	3.62861e-21	4.92512e-22	Slc6a12	GO:0005623//cell;GO:0016021//integral component of membrane;GO:0031224//intrinsic component of membrane;GO:0071944//cell periphery;GO:0031226//intrinsic component of plasma membrane;GO:0016020//membrane;GO:0005886//plasma membrane;GO:0044464//cell part;GO:0005887//integral component of plasma membrane;GO:0044459//plasma membrane part;GO:0044425//membrane part;GO:0005342//organic acid transmembran…	K05039//solute carrier family 6 (neurotransmitter transporter, GABA) member 6/8/11/12/13;K05039//solute carrier family 6 (neurotransmitter transporter, GABA) member 6/8/11/12/13
BGI_novel_G000087	0.76	0	-6.24793	6.03218e-33	5.3036e-34	BGI_novel_G000087	GO:0010647//positive regulation of cell communication;GO:0051246//regulation of protein metabolic process;GO:0051174//regulation of phosphorus metabolic process;GO:0033674//positive regulation of kinase activity;GO:0045860//positive regulation of protein kinase activity;GO:0048583//regulation of response to stimulus;GO:0009987//cellular process;GO:0019220//regulation of phosphate metabolic proces…	K06112//membrane-associated guanylate kinase-related+ko04015//Rap1 signaling pathway
73847	0.73	0	-6.18982	1.03895e-12	2.16702e-13	Fam110a
105734727	0.72	0	-6.16993	1.47958e-07	4.51758e-08	Emc8-1190005i06rik		K10733//GINS complex subunit 2;K06697//proteasome activator subunit 2 (PA28 beta)+ko04612//Antigen processing and presentation+ko03050//Proteasome
17067	0.72	0	-6.16993	1.3554e-06	4.4898e-07	Ly6c1	GO:0009897//external side of plasma membrane;GO:0098552//side of membrane;GO:0031224//intrinsic component of membrane;GO:0005623//cell;GO:0044425//membrane part;GO:0016020//membrane;GO:0031225//anchored component of membrane;GO:0005886//plasma membrane;GO:0044464//cell part;GO:0044459//plasma membrane part;GO:0009986//cell surface;GO:0071944//cell periphery;	K06846//lymphocyte antigen 6 complex locus protein D/E/G6/H;K06846//lymphocyte antigen 6 complex locus protein D/E/G6/H;K06846//lymphocyte antigen 6 complex locus protein D/E/G6/H;K06846//lymphocyte antigen 6 complex locus protein D/E/G6/H;K06846//lymphocyte antigen 6 complex locus protein D/E/G6/H;K06846//lymphocyte antigen 6 complex locus protein D/E/G6/H
101488212	0.69	0	-6.10852	4.95346e-28	5.14248e-29	Gm21975	GO:0010948//negative regulation of cell cycle process;GO:0051094//positive regulation of developmental process;GO:0060548//negative regulation of cell death;GO:0032501//multicellular organismal process;GO:0007275//multicellular organism development;GO:1903708//positive regulation of hemopoiesis;GO:0071157//negative regulation of cell cycle arrest;GO:0010941//regulation of cell death;GO:0043069//n…	K16854//ecotropic viral integration site 2B protein;K16854//ecotropic viral integration site 2B protein
56635	0.66	0	-6.04439	2.82171e-06	9.65308e-07	Prl2a1	GO:0005576//extracellular region;GO:0098772//molecular function regulator;GO:0048018//receptor ligand activity;GO:0005488//binding;GO:0005515//protein binding;GO:0005102//receptor binding;GO:0005179//hormone activity;GO:0030545//receptor regulator activity;	K05439//prolactin+ko04630//Jak-STAT signaling pathway+ko04917//Prolactin signaling pathway+ko04151//PI3K-Akt signaling pathway+ko04080//Neuroactive ligand-receptor interaction+ko04060//Cytokine-cytokine receptor interaction
72774	0.65	0	-6.02237	4.62362e-12	1.00171e-12	Neil1	GO:0034641//cellular nitrogen compound metabolic process;GO:0045934//negative regulation of nucleobase-containing compound metabolic process;GO:0031323//regulation of cellular metabolic process;GO:0050794//regulation of cellular process;GO:0006950//response to stress;GO:0044260//cellular macromolecule metabolic process;GO:0044238//primary metabolic process;GO:0051172//negative regulation of nitro…	K10567//endonuclease VIII-like 1 [EC:3.2.2.- 4.2.99.18]+ko03410//Base excision repair;K10567//endonuclease VIII-like 1 [EC:3.2.2.- 4.2.99.18]+ko03410//Base excision repair
108169010	0.64	0	-6	2.79704e-16	4.77552e-17	LOC108169010
56489	0.6	0	-5.90689	9.73947e-12	2.15368e-12	Ikbke	GO:0048522//positive regulation of cellular process;GO:0019538//protein metabolic process;GO:0022607//cellular component assembly;GO:0006461//protein complex assembly;GO:0051716//cellular response to stimulus;GO:0006807//nitrogen compound metabolic process;GO:0035456//response to interferon-beta;GO:0034340//response to type I interferon;GO:0044238//primary metabolic process;GO:0009607//response t…	K07211//inhibitor of nuclear factor kappa-B kinase subunit epsilon [EC:2.7.11.10]+ko04657//IL-17 signaling pathway+ko04625//C-type lectin receptor signaling pathway+ko04621//NOD-like receptor signaling pathway+ko04620//Toll-like receptor signaling pathway+ko04623//Cytosolic DNA-sensing pathway+ko04622//RIG-I-like receptor signaling pathway+ko05161//Hepatitis B+ko05160//Hepatitis C+ko05162//Measle…
16431	0.58	0	-5.85798	1.89174e-10	4.60198e-11	Itm2a	GO:0030154//cell differentiation;GO:0045321//leukocyte activation;GO:0002312//B cell activation involved in immune response;GO:0010561//negative regulation of glycoprotein biosynthetic process;GO:0046649//lymphocyte activation;GO:0050896//response to stimulus;GO:0006955//immune response;GO:2000112//regulation of cellular macromolecule biosynthetic process;GO:1903019//negative regulation of glycop…	K18241//integral membrane protein 2A
12941	0.57	0	-5.83289	1.28403e-32	1.14028e-33	Pcdha5	GO:0009987//cellular process;GO:0007155//cell adhesion;GO:0032502//developmental process;GO:0007267//cell-cell signaling;GO:0098742//cell-cell adhesion via plasma-membrane adhesion molecules;GO:0007399//nervous system development;GO:0022610//biological adhesion;GO:0048856//anatomical structure development;GO:0023052//signaling;GO:0007154//cell communication;GO:0048731//system development;GO:00986…	K16493//protocadherin alpha
245020	0.56	0	-5.80735	8.36301e-10	2.12728e-10	Slc35g2	GO:0012505//endomembrane system;GO:0016021//integral component of membrane;GO:0016020//membrane;GO:0043226//organelle;GO:0043231//intracellular membrane-bounded organelle;GO:0043229//intracellular organelle;GO:0005886//plasma membrane;GO:0044425//membrane part;GO:0005794//Golgi apparatus;GO:0043227//membrane-bounded organelle;GO:0005737//cytoplasm;GO:0044464//cell part;GO:0005623//cell;GO:0031224…
381933	0.55	0	-5.78136	1.35695e-06	4.4898e-07	6430531B16Rik		K06540//disintegrin and metalloproteinase domain-containing protein 8 [EC:3.4.24.-]
13347	0.53	0	-5.72792	3.66241e-09	9.83342e-10	Dffa	GO:0032069//regulation of nuclease activity;GO:1900118//negative regulation of execution phase of apoptosis;GO:0051128//regulation of cellular component organization;GO:0031323//regulation of cellular metabolic process;GO:0010941//regulation of cell death;GO:0042981//regulation of apoptotic process;GO:0006457//protein folding;GO:0080090//regulation of primary metabolic process;GO:0051129//negativ…	K02310//DNA fragmentation factor, 45 kD, alpha subunit+ko04210//Apoptosis
20431	0.53	0	-5.72792	1.03958e-12	2.16702e-13	Pmel	GO:0016050//vesicle organization;GO:0033059//cellular pigmentation;GO:0048753//pigment granule organization;GO:0009987//cellular process;GO:0016043//cellular component organization;GO:0043473//pigmentation;GO:0006996//organelle organization;GO:0071840//cellular component organization or biogenesis;GO:0032438//melanosome organization;GO:0005770//late endosome;GO:0005794//Golgi apparatus;GO:0012505…	K17304//melanocyte protein PMEL
66479	0.52	0	-5.70044	2.81911e-06	9.65308e-07	1700029F12Rik
53945	0.51	0	-5.67243	3.28213e-19	4.86472e-20	Slc40a1	GO:0000041//transition metal ion transport;GO:0006826//iron ion transport;GO:0048536//spleen development;GO:0071248//cellular response to metal ion;GO:0010038//response to metal ion;GO:0009987//cellular process;GO:0048871//multicellular organismal homeostasis;GO:0010557//positive regulation of macromolecule biosynthetic process;GO:0060255//regulation of macromolecule metabolic process;GO:0034395/…	K14685//solute carrier family 40 (iron-regulated transporter), member 1+ko04216//Ferroptosis+ko04978//Mineral absorption
56534	0.51	0	-5.67243	0.000222771	9.5347e-05	Hspb3	GO:0044424//intracellular part;GO:0044428//nuclear part;GO:0044451//nucleoplasm part;GO:0043227//membrane-bounded organelle;GO:0005634//nucleus;GO:0043233//organelle lumen;GO:0044464//cell part;GO:0044446//intracellular organelle part;GO:0070013//intracellular organelle lumen;GO:0031981//nuclear lumen;GO:0016607//nuclear speck;GO:0005654//nucleoplasm;GO:0043229//intracellular organelle;GO:0043231…	K09544//heat shock protein beta-3
12640	0.49	0	-5.61471	0.000939125	0.000440746	Cga	GO:0006810//transport;GO:0009987//cellular process;GO:0010033//response to organic substance;GO:0006725//cellular aromatic compound metabolic process;GO:0042445//hormone metabolic process;GO:0009719//response to endogenous stimulus;GO:0008152//metabolic process;GO:0046621//negative regulation of organ growth;GO:0040007//growth;GO:0007267//cell-cell signaling;GO:0009914//hormone transport;GO:00650…	K08522//glycoprotein hormones, alpha polypeptide+ko04918//Thyroid hormone synthesis+ko04917//Prolactin signaling pathway+ko04913//Ovarian steroidogenesis+ko04912//GnRH signaling pathway+ko05320//Autoimmune thyroid disease+ko04080//Neuroactive ligand-receptor interaction+ko04923//Regulation of lipolysis in adipocytes
73463	0.49	0	-5.61471	8.36924e-10	2.12728e-10	Als2cr11
14313	0.97	0.02	-5.59991	2.12727e-24	2.53716e-25	Fst	GO:0060255//regulation of macromolecule metabolic process;GO:0048608//reproductive structure development;GO:0023052//signaling;GO:0048583//regulation of response to stimulus;GO:0031326//regulation of cellular biosynthetic process;GO:0048609//multicellular organismal reproductive process;GO:0048519//negative regulation of biological process;GO:0048585//negative regulation of response to stimulus;G…	K04661//follistatin+ko04350//TGF-beta signaling pathway
381937	0.48	0	-5.58496	1.21664e-05	4.46218e-06	Gm5157	GO:0009987//cellular process;GO:0030010//establishment of cell polarity;GO:0007010//cytoskeleton organization;GO:0000226//microtubule cytoskeleton organization;GO:0007017//microtubule-based process;GO:0006996//organelle organization;GO:0016043//cellular component organization;GO:0071840//cellular component organization or biogenesis;GO:0007163//establishment or maintenance of cell polarity;GO:009…	K08798//MAP/microtubule affinity-regulating kinase [EC:2.7.11.1]
70458	0.48	0	-5.58496	1.35618e-06	4.4898e-07	2610318N02Rik		K10598//peptidyl-prolyl cis-trans isomerase-like 2 [EC:5.2.1.8]+ko04120//Ubiquitin mediated proteolysis;K01047//secretory phospholipase A2 [EC:3.1.1.4]+ko00590//Arachidonic acid metabolism+ko04975//Fat digestion and absorption+ko04972//Pancreatic secretion+ko00564//Glycerophospholipid metabolism+ko00565//Ether lipid metabolism+ko04270//Vascular smooth muscle contraction+ko04014//Ras signaling pat…
101055863	0.47	0	-5.55459	2.81859e-06	9.65308e-07	Gm11239
109652	0.47	0	-5.55459	1.48019e-07	4.51758e-08	Acy1	GO:0008152//metabolic process;GO:0044237//cellular metabolic process;GO:0006082//organic acid metabolic process;GO:0006520//cellular amino acid metabolic process;GO:0009987//cellular process;GO:0019752//carboxylic acid metabolic process;GO:0044238//primary metabolic process;GO:0019538//protein metabolic process;GO:0043436//oxoacid metabolic process;GO:1901575//organic substance catabolic process;…	K14677//aminoacylase [EC:3.5.1.14]+ko01230//Biosynthesis of amino acids+ko00220//Arginine biosynthesis+ko01100//Metabolic pathways+ko01210//2-Oxocarboxylic acid metabolism
442803	0.47	0	-5.55459	5.23172e-05	2.06266e-05	A830005F24Rik
225742	0.46	0	-5.52356	1.60155e-08	4.54554e-09	St8sia5	GO:0008152//metabolic process;GO:1901564//organonitrogen compound metabolic process;GO:0009101//glycoprotein biosynthetic process;GO:1901135//carbohydrate derivative metabolic process;GO:0044238//primary metabolic process;GO:0071704//organic substance metabolic process;GO:0009100//glycoprotein metabolic process;GO:0009059//macromolecule biosynthetic process;GO:0009987//cellular process;GO:0009058…	K03369//alpha-N-acetyl-neuraminate alpha-2,8-sialyltransferase (sialyltransferase 8E) [EC:2.4.99.-]+ko00604//Glycosphingolipid biosynthesis - ganglio series+ko01100//Metabolic pathways
17146	0.45	0	-5.49185	0.000107726	4.43474e-05	Mageb2		K22823//non-structural maintenance of chromosomes element 3
243866	0.45	0	-5.49185	9.02091e-11	2.14044e-11	Gm4969	GO:0043226//organelle;GO:0005623//cell;GO:0005634//nucleus;GO:0005622//intracellular;GO:0044424//intracellular part;GO:0043231//intracellular membrane-bounded organelle;GO:0043227//membrane-bounded organelle;GO:0044464//cell part;GO:0043229//intracellular organelle;GO:0003676//nucleic acid binding;GO:0046983//protein dimerization activity;GO:0005515//protein binding;GO:1901363//heterocyclic compo…	K09272//structure-specific recognition protein 1
50759	0.45	0.01	-5.49185	0.000151027	6.32492e-05	Fbxo16		K10299//F-box protein 16
332396	0.43	0.01	-5.42626	2.7397e-13	5.50014e-14	Kcnk18	GO:0098662//inorganic cation transmembrane transport;GO:0051179//localization;GO:0042391//regulation of membrane potential;GO:0071214//cellular response to abiotic stimulus;GO:0034220//ion transmembrane transport;GO:0065007//biological regulation;GO:0071435//potassium ion export;GO:0051234//establishment of localization;GO:0104004//cellular response to environmental stimulus;GO:0030322//stabiliza…	K20007//potassium channel subfamily K member 18
70061	0.43	0.01	-5.42626	2.38942e-12	5.11642e-13	Sdr9c7	GO:0008152//metabolic process;GO:0055114//oxidation-reduction process;GO:0005829//cytosol;GO:0005623//cell;GO:0044428//nuclear part;GO:0031981//nuclear lumen;GO:0043233//organelle lumen;GO:0005634//nucleus;GO:0043231//intracellular membrane-bounded organelle;GO:0005737//cytoplasm;GO:0043232//intracellular non-membrane-bounded organelle;GO:0031974//membrane-enclosed lumen;GO:0043227//membrane-boun…	K13369//17beta-estradiol 17-dehydrogenase / all-trans-retinol dehydrogenase (NAD+) / 3alpha(17beta)-hydroxysteroid dehydrogenase (NAD+) [EC:1.1.1.62 1.1.1.105 1.1.1.239]+ko00830//Retinol metabolism+ko00140//Steroid hormone biosynthesis+ko01100//Metabolic pathways;K11154//retinol dehydrogenase 16 [EC:1.1.1.-]+ko00830//Retinol metabolism+ko01100//Metabolic pathways
71591	0.43	0	-5.42626	6.23039e-17	1.03309e-17	Zfp251	GO:0006355//regulation of transcription, DNA-templated;GO:0019219//regulation of nucleobase-containing compound metabolic process;GO:0080090//regulation of primary metabolic process;GO:0051171//regulation of nitrogen compound metabolic process;GO:1903506//regulation of nucleic acid-templated transcription;GO:0031326//regulation of cellular biosynthetic process;GO:0050789//regulation of biological…	K09228//KRAB domain-containing zinc finger protein
15936	0.42	0	-5.39232	3.1054e-07	9.71282e-08	Ier2	GO:0050794//regulation of cellular process;GO:1903508//positive regulation of nucleic acid-templated transcription;GO:0042221//response to chemical;GO:0040011//locomotion;GO:0051173//positive regulation of nitrogen compound metabolic process;GO:0048522//positive regulation of cellular process;GO:0007399//nervous system development;GO:0071774//response to fibroblast growth factor;GO:0006928//movem…
16187	0.42	0	-5.39232	0.00045688	0.000204998	Il3	GO:0043069//negative regulation of programmed cell death;GO:0048519//negative regulation of biological process;GO:0045859//regulation of protein kinase activity;GO:0042981//regulation of apoptotic process;GO:0002761//regulation of myeloid leukocyte differentiation;GO:0051239//regulation of multicellular organismal process;GO:0042976//activation of Janus kinase activity;GO:0045860//positive regula…	K04736//interleukin 3+ko04630//Jak-STAT signaling pathway+ko04640//Hematopoietic cell lineage+ko04210//Apoptosis+ko04664//Fc epsilon RI signaling pathway+ko05200//Pathways in cancer+ko05202//Transcriptional misregulation in cancer+ko04151//PI3K-Akt signaling pathway+ko05310//Asthma+ko05221//Acute myeloid leukemia+ko04060//Cytokine-cytokine receptor interaction
50528	0.42	0	-5.39232	5.2771e-14	1.01415e-14	Tmprss2	GO:0050789//regulation of biological process;GO:0043170//macromolecule metabolic process;GO:0006807//nitrogen compound metabolic process;GO:0046598//positive regulation of viral entry into host cell;GO:1901564//organonitrogen compound metabolic process;GO:0050792//regulation of viral process;GO:0043900//regulation of multi-organism process;GO:0010467//gene expression;GO:0048524//positive regulati…	K09633//transmembrane protease serine 2 [EC:3.4.21.-]+ko05215//Prostate cancer+ko05202//Transcriptional misregulation in cancer+ko05164//Influenza A
77577	0.42	0	-5.39232	3.10352e-07	9.71282e-08	Spns3	GO:0065007//biological regulation;GO:0050896//response to stimulus;GO:0007186//G-protein coupled receptor signaling pathway;GO:0051716//cellular response to stimulus;GO:0023052//signaling;GO:0003376//sphingosine-1-phosphate signaling pathway;GO:0040011//locomotion;GO:0050789//regulation of biological process;GO:0006810//transport;GO:0050794//regulation of cellular process;GO:0009987//cellular pro…	K20225//capicua transcriptional repressor+ko04013//MAPK signaling pathway - fly;K14156//choline/ethanolamine kinase [EC:2.7.1.32 2.7.1.82]+ko00564//Glycerophospholipid metabolism+ko05231//Choline metabolism in cancer+ko01100//Metabolic pathways
BGI_novel_G000137	0.42	0	-5.39232	2.06017e-25	2.34798e-26	BGI_novel_G000137	GO:0051649//establishment of localization in cell;GO:0070727//cellular macromolecule localization;GO:0006810//transport;GO:0008104//protein localization;GO:0051179//localization;GO:0015031//protein transport;GO:0042886//amide transport;GO:0006886//intracellular protein transport;GO:0033036//macromolecule localization;GO:0045184//establishment of protein localization;GO:0071702//organic substance …	K18755//importin-8
434728	0.41	0	-5.35755	0.000937361	0.000440746	Fthl17-ps1	GO:0030001//metal ion transport;GO:0055065//metal ion homeostasis;GO:0065007//biological regulation;GO:0098771//inorganic ion homeostasis;GO:0051651//maintenance of location in cell;GO:0042592//homeostatic process;GO:0006812//cation transport;GO:0055076//transition metal ion homeostasis;GO:0046916//cellular transition metal ion homeostasis;GO:0000041//transition metal ion transport;GO:0006880//in…	K00522//ferritin heavy chain [EC:1.16.3.2]+ko04216//Ferroptosis+ko04217//Necroptosis+ko04978//Mineral absorption
70552	0.41	0	-5.35755	1.75412e-09	4.57366e-10	Lrrc56		K17550//protein phosphatase 1 regulatory subunit 7
100039240	0.39	0	-5.2854	0.000938116	0.000440746	Gm10058	GO:0022414//reproductive process;GO:0051321//meiotic cell cycle;GO:0000003//reproduction;GO:0007049//cell cycle;GO:0009987//cellular process;GO:0043231//intracellular membrane-bounded organelle;GO:0043226//organelle;GO:0043233//organelle lumen;GO:0044464//cell part;GO:0099086//synaptonemal structure;GO:0031974//membrane-enclosed lumen;GO:0044446//intracellular organelle part;GO:0005622//intracell…	K19528//synaptonemal complex protein 3+ko03440//Homologous recombination
14057	0.39	0	-5.2854	5.88234e-06	2.07542e-06	Sfxn1	GO:0051179//localization;GO:0048872//homeostasis of number of cells;GO:0055080//cation homeostasis;GO:0048869//cellular developmental process;GO:0030001//metal ion transport;GO:0048878//chemical homeostasis;GO:0030099//myeloid cell differentiation;GO:0030218//erythrocyte differentiation;GO:0006810//transport;GO:0030097//hemopoiesis;GO:0002520//immune system development;GO:0009987//cellular proces…	K03351//anaphase-promoting complex subunit 4+ko04914//Progesterone-mediated oocyte maturation+ko04120//Ubiquitin mediated proteolysis+ko04114//Oocyte meiosis+ko04110//Cell cycle+ko05166//HTLV-I infection;K02542//DNA replication licensing factor MCM6 [EC:3.6.4.12]+ko03030//DNA replication+ko04110//Cell cycle;K03351//anaphase-promoting complex subunit 4+ko04914//Progesterone-mediated oocyte maturat…
209837	0.39	0	-5.2854	3.36921e-08	9.77294e-09	Slc38a5	GO:0005886//plasma membrane;GO:0071944//cell periphery;GO:0005887//integral component of plasma membrane;GO:0005623//cell;GO:0016020//membrane;GO:0031224//intrinsic component of membrane;GO:0044459//plasma membrane part;GO:0044425//membrane part;GO:0016021//integral component of membrane;GO:0031226//intrinsic component of plasma membrane;GO:0044464//cell part;GO:0015238//drug transmembrane transp…	K14992//solute carrier family 38 (sodium-coupled neutral amino acid transporter), member 5+ko04727//GABAergic synapse
50918	0.39	0	-5.2854	1.03864e-12	2.16702e-13	Myadm	GO:0010563//negative regulation of phosphorus metabolic process;GO:0110053//regulation of actin filament organization;GO:0045936//negative regulation of phosphate metabolic process;GO:1990778//protein localization to cell periphery;GO:0072659//protein localization to plasma membrane;GO:0031579//membrane raft organization;GO:1900026//positive regulation of substrate adhesion-dependent cell spreadi…	K22526//myocardin;K04224//tachykinin receptor 3+ko04020//Calcium signaling pathway+ko04080//Neuroactive ligand-receptor interaction
67759	0.39	0	-5.2854	0.000938368	0.000440746	Plgrkt	GO:0009893//positive regulation of metabolic process;GO:0070613//regulation of protein processing;GO:1903317//regulation of protein maturation;GO:0006950//response to stress;GO:0006935//chemotaxis;GO:0065007//biological regulation;GO:0051173//positive regulation of nitrogen compound metabolic process;GO:0019222//regulation of metabolic process;GO:0042330//taxis;GO:0051247//positive regulation of …
242584	0.38	0.01	-5.24793	2.73884e-13	5.50014e-14	Wdr78	GO:0048534//hematopoietic or lymphoid organ development;GO:0002376//immune system process;GO:0007017//microtubule-based process;GO:0030097//hemopoiesis;GO:0009987//cellular process;GO:0048869//cellular developmental process;GO:0007275//multicellular organism development;GO:0007018//microtubule-based movement;GO:0006928//movement of cell or subcellular component;GO:0048731//system development;GO:0…	K22001//insulin-like 5+ko04926//Relaxin signaling pathway;K10409//dynein intermediate chain 1, axonemal+ko05016//Huntington's disease;K22001//insulin-like 5+ko04926//Relaxin signaling pathway;K10409//dynein intermediate chain 1, axonemal+ko05016//Huntington's disease;K22001//insulin-like 5+ko04926//Relaxin signaling pathway;K10409//dynein intermediate chain 1, axonemal+ko05016//Huntington's disea…
258952	0.38	0	-5.24793	0.000456367	0.000204998	Olfr341	GO:0007608//sensory perception of smell;GO:0009987//cellular process;GO:0050789//regulation of biological process;GO:0050877//nervous system process;GO:0050896//response to stimulus;GO:0007165//signal transduction;GO:0003008//system process;GO:0023052//signaling;GO:0065007//biological regulation;GO:0007186//G-protein coupled receptor signaling pathway;GO:0032501//multicellular organismal process;…	K04257//olfactory receptor+ko04740//Olfactory transduction
269389	0.38	0.01	-5.24793	1.08018e-07	3.26472e-08	Tox2	GO:0060255//regulation of macromolecule metabolic process;GO:0061458//reproductive system development;GO:0010468//regulation of gene expression;GO:0031328//positive regulation of cellular biosynthetic process;GO:0051173//positive regulation of nitrogen compound metabolic process;GO:0051252//regulation of RNA metabolic process;GO:0019222//regulation of metabolic process;GO:0010628//positive regula…	K18808//toll-like receptor 13;K09272//structure-specific recognition protein 1
11698	0.37	0	-5.20945	7.06715e-08	2.1012e-08	Ambn	GO:0009887//animal organ morphogenesis;GO:0048513//animal organ development;GO:0009888//tissue development;GO:0009987//cellular process;GO:0048856//anatomical structure development;GO:0008283//cell proliferation;GO:0009653//anatomical structure morphogenesis;GO:0016043//cellular component organization;GO:0042475//odontogenesis of dentin-containing tooth;GO:0007155//cell adhesion;GO:0048731//syste…
56636	0.37	0	-5.20945	0.000456751	0.000204998	Fgf21	GO:0050896//response to stimulus;GO:0009966//regulation of signal transduction;GO:0071326//cellular response to monosaccharide stimulus;GO:0042325//regulation of phosphorylation;GO:0009719//response to endogenous stimulus;GO:0071322//cellular response to carbohydrate stimulus;GO:0007169//transmembrane receptor protein tyrosine kinase signaling pathway;GO:0009991//response to extracellular stimulu…	K22429//fibroblast growth factor 21+ko04810//Regulation of actin cytoskeleton+ko05226//Gastric cancer+ko05218//Melanoma+ko04714//Thermogenesis+ko05200//Pathways in cancer+ko05224//Breast cancer+ko04151//PI3K-Akt signaling pathway+ko04010//MAPK signaling pathway+ko04014//Ras signaling pathway+ko04015//Rap1 signaling pathway
72772	0.74	0.02	-5.20945	4.40316e-24	5.32934e-25	Rint1	GO:2001020//regulation of response to DNA damage stimulus;GO:0033036//macromolecule localization;GO:0045184//establishment of protein localization;GO:0060628//regulation of ER to Golgi vesicle-mediated transport;GO:0010564//regulation of cell cycle process;GO:0015833//peptide transport;GO:0071705//nitrogen compound transport;GO:0010646//regulation of cell communication;GO:0007346//regulation of m…	K20474//RAD50-interacting protein 1;K20474//RAD50-interacting protein 1;K20474//RAD50-interacting protein 1
75083	0.37	0	-5.20945	3.10102e-07	9.71282e-08	Usp50	GO:0043170//macromolecule metabolic process;GO:0044265//cellular macromolecule catabolic process;GO:1901564//organonitrogen compound metabolic process;GO:0036211//protein modification process;GO:0019538//protein metabolic process;GO:0019941//modification-dependent protein catabolic process;GO:0006464//cellular protein modification process;GO:0070647//protein modification by small protein conjugat…	K11839//ubiquitin carboxyl-terminal hydrolase 8 [EC:3.4.19.12]+ko04144//Endocytosis+ko04137//Mitophagy - animal+ko04934//Cushing's syndrome
BGI_novel_G000255	0.37	0	-5.20945	2.52127e-05	9.59372e-06	BGI_novel_G000255		K21596//calmodulin-binding transcription activator
100465	0.36	0	-5.16993	9.7367e-12	2.15368e-12	Mob3c	GO:0016772//transferase activity, transferring phosphorus-containing groups;GO:0016740//transferase activity;GO:0043169//cation binding;GO:0016301//kinase activity;GO:0046872//metal ion binding;GO:0043167//ion binding;GO:0003824//catalytic activity;GO:0005488//binding;	K06685//MOB kinase activator 1+ko04391//Hippo signaling pathway - fly+ko04390//Hippo signaling pathway+ko04392//Hippo signaling pathway - multiple species;K06685//MOB kinase activator 1+ko04391//Hippo signaling pathway - fly+ko04390//Hippo signaling pathway+ko04392//Hippo signaling pathway - multiple species;K06685//MOB kinase activator 1+ko04391//Hippo signaling pathway - fly+ko04390//Hippo sign…
57436	0.36	0	-5.16993	3.09853e-07	9.71282e-08	Gabarapl1		K08341//GABA(A) receptor-associated protein+ko04140//Autophagy - animal+ko04212//Longevity regulating pathway - worm+ko04137//Mitophagy - animal+ko04136//Autophagy - other+ko04727//GABAergic synapse+ko04621//NOD-like receptor signaling pathway+ko04371//Apelin signaling pathway+ko04068//FoxO signaling pathway+ko05167//Kaposi's sarcoma-associated herpesvirus infection
76701	0.36	0	-5.16993	0.00045611	0.000204998	Ctrc	GO:0006875//cellular metal ion homeostasis;GO:0019725//cellular homeostasis;GO:0043170//macromolecule metabolic process;GO:1901564//organonitrogen compound metabolic process;GO:0065008//regulation of biological quality;GO:0019538//protein metabolic process;GO:0050801//ion homeostasis;GO:0006874//cellular calcium ion homeostasis;GO:0098771//inorganic ion homeostasis;GO:0006807//nitrogen compound m…	K01311//chymotrypsin C [EC:3.4.21.2]
15476	0.35	0	-5.12928	5.88444e-06	2.07542e-06	Hs3st1	GO:0005796//Golgi lumen;GO:0044464//cell part;GO:0043233//organelle lumen;GO:0043229//intracellular organelle;GO:0005623//cell;GO:0070013//intracellular organelle lumen;GO:0043227//membrane-bounded organelle;GO:0044431//Golgi apparatus part;GO:0005622//intracellular;GO:0012505//endomembrane system;GO:0044446//intracellular organelle part;GO:0005737//cytoplasm;GO:0043231//intracellular membrane-bo…	K01024//[heparan sulfate]-glucosamine 3-sulfotransferase 1 [EC:2.8.2.23]+ko00534//Glycosaminoglycan biosynthesis - heparan sulfate / heparin
268878	0.35	0	-5.12928	2.04217e-11	4.63046e-12	Atp13a5	GO:0065008//regulation of biological quality;GO:0055080//cation homeostasis;GO:0055074//calcium ion homeostasis;GO:0006874//cellular calcium ion homeostasis;GO:0055065//metal ion homeostasis;GO:0006811//ion transport;GO:0006873//cellular ion homeostasis;GO:0065007//biological regulation;GO:0055082//cellular chemical homeostasis;GO:0019725//cellular homeostasis;GO:0098771//inorganic ion homeostasi…	K14951//cation-transporting P-type ATPase 13A3/4/5 [EC:3.6.3.-]
64435	0.35	0	-5.12928	3.66931e-09	9.83342e-10	Fcamr	GO:0002250//adaptive immune response;GO:0006955//immune response;GO:0002376//immune system process;GO:0050896//response to stimulus;GO:0044464//cell part;GO:0044425//membrane part;GO:0016020//membrane;GO:0005623//cell;GO:0016021//integral component of membrane;GO:0031224//intrinsic component of membrane;GO:0005886//plasma membrane;GO:0071944//cell periphery;GO:0038023//signaling receptor activity…	K16851//high affinity immunoglobulin alpha and immunoglobulin mu Fc receptor
68588	0.35	0	-5.12928	0.000107611	4.43474e-05	Cthrc1	GO:0051094//positive regulation of developmental process;GO:1905114//cell surface receptor signaling pathway involved in cell-cell signaling;GO:0051674//localization of cell;GO:0030278//regulation of ossification;GO:0120036//plasma membrane bounded cell projection organization;GO:0007165//signal transduction;GO:0050794//regulation of cellular process;GO:0009653//anatomical structure morphogenesis…	K19721//collagen, type V/XI/XXIV/XXVII, alpha+ko04974//Protein digestion and absorption;K13649//folate receptor+ko04144//Endocytosis+ko01523//Antifolate resistance
18301	0.34	0	-5.08746	0.000456944	0.000204998	Fxyd5	GO:0032412//regulation of ion transmembrane transporter activity;GO:0050789//regulation of biological process;GO:1904062//regulation of cation transmembrane transport;GO:0051049//regulation of transport;GO:0065007//biological regulation;GO:0032879//regulation of localization;GO:0034765//regulation of ion transmembrane transport;GO:0010959//regulation of metal ion transport;GO:0022898//regulation …	K13362//FXYD domain-containing ion transport regulator 5
20840	0.34	0	-5.08746	3.66499e-09	9.83342e-10	Stac	GO:2001257//regulation of cation channel activity;GO:1903169//regulation of calcium ion transmembrane transport;GO:0065009//regulation of molecular function;GO:0033554//cellular response to stress;GO:0032879//regulation of localization;GO:0009628//response to abiotic stimulus;GO:0009266//response to temperature stimulus;GO:0006950//response to stress;GO:0050789//regulation of biological process;G…	K06114//spectrin alpha+ko04210//Apoptosis
69861	0.34	0	-5.08746	0.000107908	4.43474e-05	2010003K11Rik
75010	0.34	0	-5.08746	2.816e-06	9.65308e-07	Tmbim7	GO:0016020//membrane;GO:0016021//integral component of membrane;GO:0031224//intrinsic component of membrane;GO:0044425//membrane part;	K06890//uncharacterized protein
105245406	0.33	0	-5.04439	6.47173e-07	2.08826e-07	LOC105245406		K19695//neurocalcin delta+ko04740//Olfactory transduction
11441	0.33	0.01	-5.04439	8.92336e-07	2.90748e-07	Chrna7	GO:0010033//response to organic substance;GO:0030317//flagellated sperm motility;GO:0051239//regulation of multicellular organismal process;GO:0050793//regulation of developmental process;GO:0048666//neuron development;GO:0003073//regulation of systemic arterial blood pressure;GO:0060359//response to ammonium ion;GO:1902533//positive regulation of intracellular signal transduction;GO:0050801//ion…	K04809//nicotinic acetylcholine receptor alpha-7+ko04020//Calcium signaling pathway+ko04725//Cholinergic synapse+ko05033//Nicotine addiction+ko05204//Chemical carcinogenesis+ko04080//Neuroactive ligand-receptor interaction
12504	0.33	0	-5.04439	2.04274e-11	4.63046e-12	Cd4	GO:0009987//cellular process;GO:1902531//regulation of intracellular signal transduction;GO:0023052//signaling;GO:0007275//multicellular organism development;GO:0071310//cellular response to organic substance;GO:0010646//regulation of cell communication;GO:0002824//positive regulation of adaptive immune response based on somatic recombination of immune receptors built from immunoglobulin superfam…	K06454//T-cell surface glycoprotein CD4+ko04640//Hematopoietic cell lineage+ko04514//Cell adhesion molecules (CAMs)+ko04658//Th1 and Th2 cell differentiation+ko04659//Th17 cell differentiation+ko04612//Antigen processing and presentation+ko04660//T cell receptor signaling pathway+ko05340//Primary immunodeficiency+ko04060//Cytokine-cytokine receptor interaction
20471	0.33	0	-5.04439	1.89272e-10	4.60198e-11	Six1		K15614//homeobox protein SIX1+ko05202//Transcriptional misregulation in cancer
66375	0.33	0	-5.04439	5.21337e-05	2.06266e-05	Dhrs7	GO:0016020//membrane;GO:0003824//catalytic activity;GO:0016491//oxidoreductase activity;	K11165//dehydrogenase/reductase SDR family member 7 [EC:1.1.-.-]
20401	0.32	0	-5	3.66413e-09	9.83342e-10	Sh3bp1	GO:0032879//regulation of localization;GO:0051128//regulation of cellular component organization;GO:0030010//establishment of cell polarity;GO:0032502//developmental process;GO:0097435//supramolecular fiber organization;GO:0033043//regulation of organelle organization;GO:0016192//vesicle-mediated transport;GO:0030154//cell differentiation;GO:0090066//regulation of anatomical structure size;GO:001…	K20652//SH3-domain binding protein 1
433294	0.32	0	-5	0.000457459	0.000204998	Mettl21c	GO:0009719//response to endogenous stimulus;GO:0044260//cellular macromolecule metabolic process;GO:0097327//response to antineoplastic agent;GO:0050789//regulation of biological process;GO:0009888//tissue development;GO:1901700//response to oxygen-containing compound;GO:0033993//response to lipid;GO:1901564//organonitrogen compound metabolic process;GO:0007519//skeletal muscle tissue development…	K21805//protein N-lysine methyltransferase METTL21C [EC:2.1.1.-]
67888	0.32	0	-5	2.52295e-05	9.59372e-06	Tmem100	GO:0006355//regulation of transcription, DNA-templated;GO:0010033//response to organic substance;GO:0045446//endothelial cell differentiation;GO:0001837//epithelial to mesenchymal transition;GO:0048856//anatomical structure development;GO:1901342//regulation of vasculature development;GO:0006357//regulation of transcription from RNA polymerase II promoter;GO:0009792//embryo development ending in …
73748	0.32	0	-5	0.000107875	4.43474e-05	Gadl1	GO:0009987//cellular process;GO:0019752//carboxylic acid metabolic process;GO:0044281//small molecule metabolic process;GO:0043436//oxoacid metabolic process;GO:0044237//cellular metabolic process;GO:0006082//organic acid metabolic process;GO:0008152//metabolic process;GO:0071704//organic substance metabolic process;GO:0019842//vitamin binding;GO:0043168//anion binding;GO:0003824//catalytic activ…	K18966//sulfinoalanine decarboxylase / aspartate 1-decarboxylase [EC:4.1.1.29 4.1.1.11]+ko00410//beta-Alanine metabolism+ko00770//Pantothenate and CoA biosynthesis+ko00430//Taurine and hypotaurine metabolism+ko01100//Metabolic pathways;K18966//sulfinoalanine decarboxylase / aspartate 1-decarboxylase [EC:4.1.1.29 4.1.1.11]+ko00410//beta-Alanine metabolism+ko00770//Pantothenate and CoA biosynthesis…
12798	0.31	0	-4.9542	2.82327e-06	9.65308e-07	Cnn2	GO:0048856//anatomical structure development;GO:0071496//cellular response to external stimulus;GO:0071214//cellular response to abiotic stimulus;GO:0051270//regulation of cellular component movement;GO:0010628//positive regulation of gene expression;GO:0048513//animal organ development;GO:0030036//actin cytoskeleton organization;GO:0051271//negative regulation of cellular component movement;GO:0…	K06712//butyrophilin;K20526//transgelin
15561	0.31	0	-4.9542	1.89223e-10	4.60198e-11	Htr3a	GO:0032412//regulation of ion transmembrane transporter activity;GO:0071363//cellular response to growth factor stimulus;GO:0009410//response to xenobiotic stimulus;GO:1901700//response to oxygen-containing compound;GO:0050896//response to stimulus;GO:0009636//response to toxic substance;GO:0010033//response to organic substance;GO:0034767//positive regulation of ion transmembrane transport;GO:00…	K04819//5-hydroxytryptamine receptor 3+ko04726//Serotonergic synapse+ko04742//Taste transduction;K04819//5-hydroxytryptamine receptor 3+ko04726//Serotonergic synapse+ko04742//Taste transduction
15980	0.31	0	-4.9542	3.09977e-07	9.71282e-08	Ifngr2	GO:0051607//defense response to virus;GO:0098542//defense response to other organism;GO:0009615//response to virus;GO:0006950//response to stress;GO:0002376//immune system process;GO:0009607//response to biotic stimulus;GO:0002252//immune effector process;GO:0043207//response to external biotic stimulus;GO:0050896//response to stimulus;GO:0009605//response to external stimulus;GO:0006952//defense…	K05133//interferon gamma receptor 2+ko04630//Jak-STAT signaling pathway+ko05132//Salmonella infection+ko04217//Necroptosis+ko04650//Natural killer cell mediated cytotoxicity+ko04658//Th1 and Th2 cell differentiation+ko04659//Th17 cell differentiation+ko04380//Osteoclast differentiation+ko05145//Toxoplasmosis+ko05142//Chagas disease (American trypanosomiasis)+ko05140//Leishmaniasis+ko05321//Inflam…
19250	0.31	0	-4.9542	1.11231e-13	2.18042e-14	Ptpn14	GO:0048856//anatomical structure development;GO:0042127//regulation of cell proliferation;GO:0010556//regulation of macromolecule biosynthetic process;GO:0032501//multicellular organismal process;GO:0006351//transcription, DNA-templated;GO:0048731//system development;GO:0006807//nitrogen compound metabolic process;GO:0031323//regulation of cellular metabolic process;GO:0090304//nucleic acid metab…	K18025//tyrosine-protein phosphatase non-receptor type 14/21 [EC:3.1.3.48]
19729	0.31	0	-4.9542	0.00093711	0.000440746	Slc50a1	GO:0048518//positive regulation of biological process;GO:0010468//regulation of gene expression;GO:0045815//positive regulation of gene expression, epigenetic;GO:0065007//biological regulation;GO:0008643//carbohydrate transport;GO:0051234//establishment of localization;GO:0060255//regulation of macromolecule metabolic process;GO:0051179//localization;GO:0040029//regulation of gene expression, epi…	K15382//solute carrier family 50 (sugar transporter)
216853	0.31	0	-4.9542	1.35799e-06	4.4898e-07	Wrap53	GO:1903829//positive regulation of cellular protein localization;GO:0034645//cellular macromolecule biosynthetic process;GO:0090685//RNA localization to nucleus;GO:0051973//positive regulation of telomerase activity;GO:0043085//positive regulation of catalytic activity;GO:0006996//organelle organization;GO:0051347//positive regulation of transferase activity;GO:0000723//telomere maintenance;GO:00…	K16745//B9 domain-containing protein 2;K04539//guanine nucleotide-binding protein subunit beta-5+ko04728//Dopaminergic synapse+ko04724//Glutamatergic synapse+ko04725//Cholinergic synapse+ko04726//Serotonergic synapse+ko04727//GABAergic synapse+ko04723//Retrograde endocannabinoid signaling+ko05034//Alcoholism+ko05032//Morphine addiction+ko04713//Circadian entrainment+ko05200//Pathways in cancer+ko…
216961	0.31	0	-4.9542	8.36509e-10	2.12728e-10	Coro6	GO:0009987//cellular process;GO:0030036//actin cytoskeleton organization;GO:0007010//cytoskeleton organization;GO:0071840//cellular component organization or biogenesis;GO:0030029//actin filament-based process;GO:0016043//cellular component organization;GO:0006996//organelle organization;GO:0043228//non-membrane-bounded organelle;GO:0005622//intracellular;GO:0043229//intracellular organelle;GO:00…	K13886//coronin-1B/1C/6;K13886//coronin-1B/1C/6;K13886//coronin-1B/1C/6;K13886//coronin-1B/1C/6;K13886//coronin-1B/1C/6;K13886//coronin-1B/1C/6;K13886//coronin-1B/1C/6;K13886//coronin-1B/1C/6;K13886//coronin-1B/1C/6
22325	0.31	0	-4.9542	2.79807e-16	4.77552e-17	Vav2	GO:0031323//regulation of cellular metabolic process;GO:0120031//plasma membrane bounded cell projection assembly;GO:0030031//cell projection assembly;GO:0007599//hemostasis;GO:0032501//multicellular organismal process;GO:0035023//regulation of Rho protein signal transduction;GO:0010562//positive regulation of phosphorus metabolic process;GO:0051179//localization;GO:0042325//regulation of phospho…	K05730//guanine nucleotide exchange factor VAV+ko04024//cAMP signaling pathway+ko04810//Regulation of actin cytoskeleton+ko04510//Focal adhesion+ko04650//Natural killer cell mediated cytotoxicity+ko04664//Fc epsilon RI signaling pathway+ko04666//Fc gamma R-mediated phagocytosis+ko04660//T cell receptor signaling pathway+ko04662//B cell receptor signaling pathway+ko04670//Leukocyte transendothelia…
331004	0.31	0	-4.9542	2.18357e-12	4.6591e-13	Slc9a9	GO:0030003//cellular cation homeostasis;GO:0055085//transmembrane transport;GO:0065007//biological regulation;GO:0098660//inorganic ion transmembrane transport;GO:0051234//establishment of localization;GO:0006811//ion transport;GO:0097369//sodium ion import;GO:0071804//cellular potassium ion transport;GO:0051179//localization;GO:0055082//cellular chemical homeostasis;GO:0006813//potassium ion tra…	K14725//solute carrier family 9 (sodium/hydrogen exchanger), member 9
70617	0.31	0	-4.9542	1.21644e-05	4.46218e-06	5730508B09Rik	GO:0016021//integral component of membrane;GO:0031224//intrinsic component of membrane;GO:0016020//membrane;GO:0044425//membrane part;
71066	0.31	0	-4.9542	5.2242e-05	2.06266e-05	Hsfy2	GO:0005622//intracellular;GO:0005623//cell;GO:0043226//organelle;GO:0043229//intracellular organelle;GO:0044464//cell part;GO:0005634//nucleus;GO:0043231//intracellular membrane-bounded organelle;GO:0044424//intracellular part;GO:0043227//membrane-bounded organelle;GO:0140110//transcription regulator activity;GO:1901363//heterocyclic compound binding;GO:0003700//DNA binding transcription factor a…	K16482//centriolar protein POC1;K15694//RING finger protein 43 [EC:2.3.2.27];K01895//acetyl-CoA synthetase [EC:6.2.1.1]+ko01200//Carbon metabolism+ko00010//Glycolysis / Gluconeogenesis+ko00640//Propanoate metabolism+ko00620//Pyruvate metabolism+ko01100//Metabolic pathways+ko00630//Glyoxylate and dicarboxylate metabolism;K09417//heat shock transcription factor 4
225583	0.61	0.02	-4.93074	5.41789e-11	1.2623e-11	A730017C20Rik	GO:0031224//intrinsic component of membrane;GO:0044425//membrane part;GO:0016021//integral component of membrane;GO:0016020//membrane;
52377	0.3	0	-4.90689	5.23591e-05	2.06266e-05	Rcn3	GO:0044424//intracellular part;GO:0031974//membrane-enclosed lumen;GO:0044432//endoplasmic reticulum part;GO:0005737//cytoplasm;GO:0005783//endoplasmic reticulum;GO:0043231//intracellular membrane-bounded organelle;GO:0070013//intracellular organelle lumen;GO:0005623//cell;GO:0044464//cell part;GO:0044444//cytoplasmic part;GO:0043233//organelle lumen;GO:0043227//membrane-bounded organelle;GO:0044…	K19934//calcium-binding protein;K17286//erythrocyte band 7 integral membrane protein
99633	0.88	0.03	-4.87447	1.84722e-43	1.21284e-44	Adgrl2	GO:0009987//cellular process;GO:0007165//signal transduction;GO:0050789//regulation of biological process;GO:0051716//cellular response to stimulus;GO:0007154//cell communication;GO:0065007//biological regulation;GO:0050896//response to stimulus;GO:0023052//signaling;GO:0050794//regulation of cellular process;GO:0007166//cell surface receptor signaling pathway;GO:0044425//membrane part;GO:0016021…	K04593//latrophilin 2
100043914	0.29	0	-4.85798	4.29977e-11	9.9555e-12	Zfp968	GO:0010468//regulation of gene expression;GO:0050789//regulation of biological process;GO:2001141//regulation of RNA biosynthetic process;GO:0006355//regulation of transcription, DNA-templated;GO:0051171//regulation of nitrogen compound metabolic process;GO:0009889//regulation of biosynthetic process;GO:0010556//regulation of macromolecule biosynthetic process;GO:0031323//regulation of cellular m…	K09228//KRAB domain-containing zinc finger protein
107993	0.29	0	-4.85798	2.5242e-05	9.59372e-06	Bfsp2	GO:0048869//cellular developmental process;GO:0009987//cellular process;GO:0032502//developmental process;GO:0021700//developmental maturation;GO:0050877//nervous system process;GO:0007010//cytoskeleton organization;GO:0007601//visual perception;GO:0002064//epithelial cell development;GO:0050953//sensory perception of light stimulus;GO:0070306//lens fiber cell differentiation;GO:0048731//system d…	K10379//phakinin
17763	0.29	0	-4.85798	5.21254e-05	2.06266e-05	Mtcp1	GO:0050794//regulation of cellular process;GO:0019222//regulation of metabolic process;GO:0010562//positive regulation of phosphorus metabolic process;GO:0051174//regulation of phosphorus metabolic process;GO:0010604//positive regulation of macromolecule metabolic process;GO:0031325//positive regulation of cellular metabolic process;GO:0001934//positive regulation of protein phosphorylation;GO:00…	K16837//mature T-cell proliferation-1 type B1+ko04151//PI3K-Akt signaling pathway;K16837//mature T-cell proliferation-1 type B1+ko04151//PI3K-Akt signaling pathway
19193	0.29	0	-4.85798	5.87813e-06	2.07542e-06	Pipox	GO:0006575//cellular modified amino acid metabolic process;GO:0044282//small molecule catabolic process;GO:0006082//organic acid metabolic process;GO:0035383//thioester metabolic process;GO:0046483//heterocycle metabolic process;GO:0051186//cofactor metabolic process;GO:0019477//L-lysine catabolic process;GO:0044237//cellular metabolic process;GO:0055114//oxidation-reduction process;GO:0019474//L…	K00306//sarcosine oxidase / L-pipecolate oxidase [EC:1.5.3.1 1.5.3.7]+ko04146//Peroxisome+ko00260//Glycine, serine and threonine metabolism+ko00310//Lysine degradation+ko01100//Metabolic pathways
53624	0.29	0	-4.85798	0.000938494	0.000440746	Cldn7	GO:0044087//regulation of cellular component biogenesis;GO:0032459//regulation of protein oligomerization;GO:0051129//negative regulation of cellular component organization;GO:0097305//response to alcohol;GO:0050794//regulation of cellular process;GO:0030155//regulation of cell adhesion;GO:0045471//response to ethanol;GO:0051270//regulation of cellular component movement;GO:0050789//regulation of…	K06087//claudin+ko04514//Cell adhesion molecules (CAMs)+ko04530//Tight junction+ko04670//Leukocyte transendothelial migration+ko05160//Hepatitis C
75563	0.29	0	-4.85798	6.47299e-07	2.08826e-07	Dnali1	GO:0007018//microtubule-based movement;GO:0007017//microtubule-based process;GO:0009987//cellular process;GO:0003341//cilium movement;GO:0006928//movement of cell or subcellular component;GO:0044441//ciliary part;GO:0098858//actin-based cell projection;GO:0120038//plasma membrane bounded cell projection part;GO:0005929//cilium;GO:0032838//plasma membrane bounded cell projection cytoplasm;GO:00995…	K10410//dynein light intermediate chain, axonemal+ko05016//Huntington's disease
BGI_novel_G000442	0.29	0	-4.85798	0.000457008	0.000204998	BGI_novel_G000442	GO:0071840//cellular component organization or biogenesis;GO:0007154//cell communication;GO:0048522//positive regulation of cellular process;GO:0019538//protein metabolic process;GO:0035694//mitochondrial protein catabolic process;GO:0071453//cellular response to oxygen levels;GO:0044267//cellular protein metabolic process;GO:1902110//positive regulation of mitochondrial membrane permeability inv…	K15465//BCL2/adenovirus E1B 19 kDa protein-interacting protein 3-like+ko04137//Mitophagy - animal
102636269	0.28	0	-4.80735	0.000940389	0.000440746	Gm33383		K22016//mucin-3/17
11499	0.28	0	-4.80735	3.36701e-08	9.77294e-09	Adam5	GO:0031224//intrinsic component of membrane;GO:0016021//integral component of membrane;GO:0016020//membrane;GO:0044425//membrane part;GO:0003824//catalytic activity;GO:0070011//peptidase activity, acting on L-amino acid peptides;GO:0008233//peptidase activity;GO:0008237//metallopeptidase activity;GO:0140096//catalytic activity, acting on a protein;GO:0016787//hydrolase activity;GO:0004222//metall…	K16909//disintegrin and metalloproteinase domain-containing protein 18 [EC:3.4.24.-]
16160	0.28	0	-4.80735	7.06415e-08	2.1012e-08	Il12b	GO:0043900//regulation of multi-organism process;GO:0070665//positive regulation of leukocyte proliferation;GO:0032102//negative regulation of response to external stimulus;GO:0002694//regulation of leukocyte activation;GO:0051704//multi-organism process;GO:0043068//positive regulation of programmed cell death;GO:0010536//positive regulation of activation of Janus kinase activity;GO:0051171//regu…	K05425//interleukin 12B+ko04630//Jak-STAT signaling pathway+ko05134//Legionellosis+ko05133//Pertussis+ko04658//Th1 and Th2 cell differentiation+ko04625//C-type lectin receptor signaling pathway+ko04940//Type I diabetes mellitus+ko05146//Amoebiasis+ko05145//Toxoplasmosis+ko05143//African trypanosomiasis+ko05142//Chagas disease (American trypanosomiasis)+ko05140//Leishmaniasis+ko04620//Toll-like re…
16172	0.56	0.02	-4.80735	1.49973e-21	1.9987e-22	Il17ra	GO:0050896//response to stimulus;GO:0006952//defense response;GO:0070887//cellular response to chemical stimulus;GO:0050900//leukocyte migration;GO:0051240//positive regulation of multicellular organismal process;GO:0050714//positive regulation of protein secretion;GO:0050708//regulation of protein secretion;GO:0065007//biological regulation;GO:0051704//multi-organism process;GO:0048583//regulati…	K05164//interleukin 17 receptor A+ko04657//IL-17 signaling pathway+ko04060//Cytokine-cytokine receptor interaction
319642	0.28	0.01	-4.80735	1.79655e-10	4.36248e-11	Rab9b	GO:0051234//establishment of localization;GO:0071702//organic substance transport;GO:0046907//intracellular transport;GO:0042886//amide transport;GO:0016197//endosomal transport;GO:0033036//macromolecule localization;GO:0016192//vesicle-mediated transport;GO:0015833//peptide transport;GO:0045184//establishment of protein localization;GO:0051641//cellular localization;GO:0016482//cytosolic transpo…	K07900//Ras-related protein Rab-9B+ko05162//Measles
68668	0.28	0	-4.80735	0.00045733	0.000204998	Klk5	GO:0008544//epidermis development;GO:0010647//positive regulation of cell communication;GO:0002784//regulation of antimicrobial peptide production;GO:0002920//regulation of humoral immune response;GO:0002760//positive regulation of antimicrobial humoral response;GO:0002702//positive regulation of production of molecular mediator of immune response;GO:0002697//regulation of immune effector process…	K09617//kallikrein 5 [EC:3.4.21.-]
14204	0.27	0	-4.75489	2.81963e-06	9.65308e-07	Il4i1	GO:0006725//cellular aromatic compound metabolic process;GO:0044281//small molecule metabolic process;GO:0009072//aromatic amino acid family metabolic process;GO:0044237//cellular metabolic process;GO:0071704//organic substance metabolic process;GO:0043436//oxoacid metabolic process;GO:0008152//metabolic process;GO:0009987//cellular process;GO:1901564//organonitrogen compound metabolic process;GO…	K03334//L-amino-acid oxidase [EC:1.4.3.2]+ko00250//Alanine, aspartate and glutamate metabolism+ko00280//Valine, leucine and isoleucine degradation+ko00400//Phenylalanine, tyrosine and tryptophan biosynthesis+ko00360//Phenylalanine metabolism+ko00380//Tryptophan metabolism+ko00350//Tyrosine metabolism+ko01100//Metabolic pathways+ko00270//Cysteine and methionine metabolism
18988	0.27	0.01	-4.75489	8.92509e-07	2.90748e-07	Pou2f3	GO:0009058//biosynthetic process;GO:0010467//gene expression;GO:0044271//cellular nitrogen compound biosynthetic process;GO:0031323//regulation of cellular metabolic process;GO:1901362//organic cyclic compound biosynthetic process;GO:1901360//organic cyclic compound metabolic process;GO:0006139//nucleobase-containing compound metabolic process;GO:0044249//cellular biosynthetic process;GO:0046483/…	K09364//POU domain transcription factor, class 2
227620	0.27	0	-4.75489	2.51919e-05	9.59372e-06	Uap1l1	GO:0006725//cellular aromatic compound metabolic process;GO:0055086//nucleobase-containing small molecule metabolic process;GO:0019438//aromatic compound biosynthetic process;GO:1901135//carbohydrate derivative metabolic process;GO:0044281//small molecule metabolic process;GO:0046483//heterocycle metabolic process;GO:0006040//amino sugar metabolic process;GO:0009058//biosynthetic process;GO:00061…	K00972//UDP-N-acetylglucosamine/UDP-N-acetylgalactosamine diphosphorylase [EC:2.7.7.23 2.7.7.83]+ko00520//Amino sugar and nucleotide sugar metabolism+ko01100//Metabolic pathways
236573	0.27	0	-4.75489	3.66844e-09	9.83342e-10	Gbp9	GO:0051716//cellular response to stimulus;GO:0022610//biological adhesion;GO:0044419//interspecies interaction between organisms;GO:0002376//immune system process;GO:0006952//defense response;GO:0009617//response to bacterium;GO:0071345//cellular response to cytokine stimulus;GO:0042742//defense response to bacterium;GO:0044403//symbiosis, encompassing mutualism through parasitism;GO:0006950//res…	K20908//guanylate-binding protein 6
23917	0.27	0	-4.75489	1.48049e-07	4.51758e-08	Impdh1	GO:0002376//immune system process;GO:0044271//cellular nitrogen compound biosynthetic process;GO:1901070//guanosine-containing compound biosynthetic process;GO:0009119//ribonucleoside metabolic process;GO:0046651//lymphocyte proliferation;GO:0006183//GTP biosynthetic process;GO:0044281//small molecule metabolic process;GO:1901293//nucleoside phosphate biosynthetic process;GO:0009199//ribonucleosi…	K00088//IMP dehydrogenase [EC:1.1.1.205]+ko00983//Drug metabolism - other enzymes+ko00230//Purine metabolism+ko01100//Metabolic pathways
545477	0.27	0	-4.75489	5.23423e-05	2.06266e-05	Bpifa6	GO:0008289//lipid binding;GO:0005488//binding;
72388	0.27	0	-4.75489	9.02331e-11	2.14044e-11	Ripk4	GO:0050789//regulation of biological process;GO:0031326//regulation of cellular biosynthetic process;GO:0048518//positive regulation of biological process;GO:2001141//regulation of RNA biosynthetic process;GO:0019222//regulation of metabolic process;GO:0031323//regulation of cellular metabolic process;GO:1903506//regulation of nucleic acid-templated transcription;GO:0002009//morphogenesis of an e…	K08848//receptor-interacting serine/threonine-protein kinase 4 [EC:2.7.11.1]
74238	0.27	0	-4.75489	5.21587e-05	2.06266e-05	Mterf2	GO:0065007//biological regulation;GO:0051171//regulation of nitrogen compound metabolic process;GO:1901576//organic substance biosynthetic process;GO:0034654//nucleobase-containing compound biosynthetic process;GO:0006355//regulation of transcription, DNA-templated;GO:1901362//organic cyclic compound biosynthetic process;GO:0051252//regulation of RNA metabolic process;GO:0019222//regulation of me…	K15031//transcription termination factor, mitochondrial;K15031//transcription termination factor, mitochondrial
BGI_novel_G000344	0.27	0	-4.75489	3.10227e-07	9.71282e-08	BGI_novel_G000344		K00318//proline dehydrogenase [EC:1.5.-.-]+ko00330//Arginine and proline metabolism+ko01100//Metabolic pathways
11636	0.26	0	-4.70044	2.82119e-06	9.65308e-07	Ak1	GO:0090407//organophosphate biosynthetic process;GO:0009141//nucleoside triphosphate metabolic process;GO:0009199//ribonucleoside triphosphate metabolic process;GO:0050789//regulation of biological process;GO:0071704//organic substance metabolic process;GO:0055086//nucleobase-containing small molecule metabolic process;GO:0006139//nucleobase-containing compound metabolic process;GO:0044271//cellu…	K00939//adenylate kinase [EC:2.7.4.3]+ko00230//Purine metabolism+ko00730//Thiamine metabolism+ko01100//Metabolic pathways
12122	0.26	0	-4.70044	1.21832e-05	4.46218e-06	Bid	GO:0023051//regulation of signaling;GO:0043933//macromolecular complex subunit organization;GO:0051641//cellular localization;GO:0019693//ribose phosphate metabolic process;GO:0042775//mitochondrial ATP synthesis coupled electron transport;GO:0006796//phosphate-containing compound metabolic process;GO:0017144//drug metabolic process;GO:0048584//positive regulation of response to stimulus;GO:00718…	K04726//BH3 interacting domain death agonist+ko05014//Amyotrophic lateral sclerosis (ALS)+ko05416//Viral myocarditis+ko04215//Apoptosis - multiple species+ko04217//Necroptosis+ko04210//Apoptosis+ko04071//Sphingolipid signaling pathway+ko01524//Platinum drug resistance+ko04650//Natural killer cell mediated cytotoxicity+ko05200//Pathways in cancer+ko04932//Non-alcoholic fatty liver disease (NAFLD)+…
218038	0.26	0	-4.70044	1.75327e-09	4.57366e-10	Amph	GO:0099504//synaptic vesicle cycle;GO:0036465//synaptic vesicle recycling;GO:0007610//behavior;GO:0006897//endocytosis;GO:0051649//establishment of localization in cell;GO:0050890//cognition;GO:0003008//system process;GO:0006810//transport;GO:0099003//vesicle-mediated transport in synapse;GO:0051641//cellular localization;GO:0016192//vesicle-mediated transport;GO:0007611//learning or memory;GO:00…	K12562//amphiphysin+ko04144//Endocytosis+ko04666//Fc gamma R-mediated phagocytosis;K12562//amphiphysin+ko04144//Endocytosis+ko04666//Fc gamma R-mediated phagocytosis;K12562//amphiphysin+ko04144//Endocytosis+ko04666//Fc gamma R-mediated phagocytosis
56517	0.26	0	-4.70044	6.47046e-07	2.08826e-07	Slc22a21	GO:0006810//transport;GO:0006811//ion transport;GO:0071705//nitrogen compound transport;GO:0051179//localization;GO:0015695//organic cation transport;GO:0051234//establishment of localization;GO:0015879//carnitine transport;GO:0097164//ammonium ion metabolic process;GO:0015838//amino-acid betaine transport;GO:0006807//nitrogen compound metabolic process;GO:0044237//cellular metabolic process;GO:0…	K08202//MFS transporter, OCT family, solute carrier family 22 (organic cation transporter), member 4/5+ko05231//Choline metabolism in cancer
60525	0.26	0	-4.70044	3.36848e-08	9.77294e-09	Acss2	GO:0072330//monocarboxylic acid biosynthetic process;GO:0006084//acetyl-CoA metabolic process;GO:0035384//thioester biosynthetic process;GO:0044281//small molecule metabolic process;GO:0044237//cellular metabolic process;GO:0071704//organic substance metabolic process;GO:0019752//carboxylic acid metabolic process;GO:0044249//cellular biosynthetic process;GO:0006793//phosphorus metabolic process;G…	K01895//acetyl-CoA synthetase [EC:6.2.1.1]+ko01200//Carbon metabolism+ko00010//Glycolysis / Gluconeogenesis+ko00640//Propanoate metabolism+ko00620//Pyruvate metabolism+ko01100//Metabolic pathways+ko00630//Glyoxylate and dicarboxylate metabolism;K01895//acetyl-CoA synthetase [EC:6.2.1.1]+ko01200//Carbon metabolism+ko00010//Glycolysis / Gluconeogenesis+ko00640//Propanoate metabolism+ko00620//Pyruva…
72075	0.26	0.01	-4.70044	7.16716e-06	2.5545e-06	Ogfr	GO:0050789//regulation of biological process;GO:0040008//regulation of growth;GO:0065007//biological regulation;GO:0043229//intracellular organelle;GO:0044424//intracellular part;GO:0005622//intracellular;GO:0016020//membrane;GO:0043226//organelle;GO:0005737//cytoplasm;GO:0043231//intracellular membrane-bounded organelle;GO:0005623//cell;GO:0005634//nucleus;GO:0044464//cell part;GO:0043227//membr…	K19721//collagen, type V/XI/XXIV/XXVII, alpha+ko04974//Protein digestion and absorption
11811	1.01	0.04	-4.65821	1.08592e-10	2.59032e-11	Apobec2	GO:0009987//cellular process;GO:0006725//cellular aromatic compound metabolic process;GO:0044728//DNA methylation or demethylation;GO:0046483//heterocycle metabolic process;GO:0006807//nitrogen compound metabolic process;GO:0035510//DNA dealkylation;GO:0016554//cytidine to uridine editing;GO:0008152//metabolic process;GO:0006304//DNA modification;GO:1901360//organic cyclic compound metabolic proc…	K18772//C->U-editing enzyme APOBEC2 [EC:3.5.4.-]
12575	0.25	0.01	-4.64386	0.000109184	4.5037e-05	Cdkn1a	GO:0072331//signal transduction by p53 class mediator;GO:0051052//regulation of DNA metabolic process;GO:0048468//cell development;GO:0010605//negative regulation of macromolecule metabolic process;GO:0048518//positive regulation of biological process;GO:0050790//regulation of catalytic activity;GO:0045859//regulation of protein kinase activity;GO:0023052//signaling;GO:0090399//replicative senesc…	K06625//cyclin-dependent kinase inhibitor 1A+ko04630//Jak-STAT signaling pathway+ko05222//Small cell lung cancer+ko05223//Non-small cell lung cancer+ko05226//Gastric cancer+ko05225//Hepatocellular carcinoma+ko04218//Cellular senescence+ko01524//Platinum drug resistance+ko01522//Endocrine resistance+ko05217//Basal cell carcinoma+ko05216//Thyroid cancer+ko05215//Prostate cancer+ko05214//Glioma+ko05…
58222	0.25	0	-4.64386	2.81755e-06	9.65308e-07	Rab37	GO:0015833//peptide transport;GO:0006810//transport;GO:0032940//secretion by cell;GO:0009987//cellular process;GO:0051640//organelle localization;GO:0051049//regulation of transport;GO:0006887//exocytosis;GO:0071705//nitrogen compound transport;GO:0016192//vesicle-mediated transport;GO:0034613//cellular protein localization;GO:0022406//membrane docking;GO:0050789//regulation of biological process…	K07914//Ras-related protein Rab-37;K07914//Ras-related protein Rab-37;K07914//Ras-related protein Rab-37;K07914//Ras-related protein Rab-37;K07914//Ras-related protein Rab-37;K07914//Ras-related protein Rab-37
11571	0.24	0	-4.58496	0.000457073	0.000204998	Crisp1	GO:0044444//cytoplasmic part;GO:0043227//membrane-bounded organelle;GO:0043226//organelle;GO:0044424//intracellular part;GO:0005576//extracellular region;GO:0012505//endomembrane system;GO:0005623//cell;GO:0030133//transport vesicle;GO:0097708//intracellular vesicle;GO:0005737//cytoplasm;GO:0031410//cytoplasmic vesicle;GO:0044464//cell part;GO:0031982//vesicle;GO:0043229//intracellular organelle;…	K19919//cysteine-rich secretory protein
12686	0.24	0	-4.58496	0.000222706	9.5347e-05	Elovl3	GO:0006790//sulfur compound metabolic process;GO:0034625//fatty acid elongation, monounsaturated fatty acid;GO:0006665//sphingolipid metabolic process;GO:0044255//cellular lipid metabolic process;GO:1901576//organic substance biosynthetic process;GO:0008610//lipid biosynthetic process;GO:0006629//lipid metabolic process;GO:0006793//phosphorus metabolic process;GO:0006636//unsaturated fatty acid b…	K10248//elongation of very long chain fatty acids protein 3 [EC:2.3.1.199]+ko00062//Fatty acid elongation
16325	0.24	0	-4.58496	1.21811e-05	4.46218e-06	Inhbc	GO:0051171//regulation of nitrogen compound metabolic process;GO:0048856//anatomical structure development;GO:0010941//regulation of cell death;GO:0023051//regulation of signaling;GO:0050896//response to stimulus;GO:0007166//cell surface receptor signaling pathway;GO:0051246//regulation of protein metabolic process;GO:0090092//regulation of transmembrane receptor protein serine/threonine kinase s…	K22688//inhibin beta C chain+ko04350//TGF-beta signaling pathway+ko04550//Signaling pathways regulating pluripotency of stem cells+ko04060//Cytokine-cytokine receptor interaction
16533	0.24	0	-4.58496	9.01852e-11	2.14044e-11	Kcnmb1	GO:0009628//response to abiotic stimulus;GO:0034767//positive regulation of ion transmembrane transport;GO:0010033//response to organic substance;GO:0071229//cellular response to acid chemical;GO:0048518//positive regulation of biological process;GO:0043266//regulation of potassium ion transport;GO:0034762//regulation of transmembrane transport;GO:0003018//vascular process in circulatory system;G…	K04937//potassium large conductance calcium-activated channel subfamily M beta member 1+ko04022//cGMP-PKG signaling pathway+ko04911//Insulin secretion+ko04270//Vascular smooth muscle contraction
19703	0.24	0	-4.58496	0.000457266	0.000204998	Renbp	GO:0042737//drug catabolic process;GO:0046395//carboxylic acid catabolic process;GO:0006054//N-acetylneuraminate metabolic process;GO:0071704//organic substance metabolic process;GO:0017144//drug metabolic process;GO:0009987//cellular process;GO:1901136//carbohydrate derivative catabolic process;GO:0016054//organic acid catabolic process;GO:1901575//organic substance catabolic process;GO:0019262/…	K01787//N-acylglucosamine 2-epimerase [EC:5.1.3.8]+ko00520//Amino sugar and nucleotide sugar metabolism;K01787//N-acylglucosamine 2-epimerase [EC:5.1.3.8]+ko00520//Amino sugar and nucleotide sugar metabolism
233046	0.24	0	-4.58496	1.6019e-08	4.54554e-09	Rasgrp4	GO:0016049//cell growth;GO:1902533//positive regulation of intracellular signal transduction;GO:0050896//response to stimulus;GO:0030154//cell differentiation;GO:0010647//positive regulation of cell communication;GO:0051716//cellular response to stimulus;GO:0023052//signaling;GO:0009605//response to external stimulus;GO:0009987//cellular process;GO:0010646//regulation of cell communication;GO:000…	K12363//RAS guanyl-releasing protein 4+ko05200//Pathways in cancer+ko04010//MAPK signaling pathway+ko04014//Ras signaling pathway;K12363//RAS guanyl-releasing protein 4+ko05200//Pathways in cancer+ko04010//MAPK signaling pathway+ko04014//Ras signaling pathway;K12363//RAS guanyl-releasing protein 4+ko05200//Pathways in cancer+ko04010//MAPK signaling pathway+ko04014//Ras signaling pathway;K12363//R…
258708	0.24	0	-4.58496	0.000222345	9.5347e-05	Olfr1342	GO:0050877//nervous system process;GO:0065007//biological regulation;GO:0050794//regulation of cellular process;GO:0009987//cellular process;GO:0007600//sensory perception;GO:0007165//signal transduction;GO:0051716//cellular response to stimulus;GO:0007154//cell communication;GO:0050896//response to stimulus;GO:0032501//multicellular organismal process;GO:0003008//system process;GO:0050789//regul…	K04257//olfactory receptor+ko04740//Olfactory transduction
56395	0.24	0	-4.58496	5.88023e-06	2.07542e-06	Tmem115	GO:1901576//organic substance biosynthetic process;GO:0051234//establishment of localization;GO:0006810//transport;GO:0048869//cellular developmental process;GO:1901135//carbohydrate derivative metabolic process;GO:0036211//protein modification process;GO:0044267//cellular protein metabolic process;GO:0008152//metabolic process;GO:1901137//carbohydrate derivative biosynthetic process;GO:0006486//…	K04859//voltage-dependent calcium channel alpha-2/delta-2+ko05414//Dilated cardiomyopathy (DCM)+ko05410//Hypertrophic cardiomyopathy (HCM)+ko05412//Arrhythmogenic right ventricular cardiomyopathy (ARVC)+ko04261//Adrenergic signaling in cardiomyocytes+ko04260//Cardiac muscle contraction+ko04010//MAPK signaling pathway+ko04921//Oxytocin signaling pathway
74711	0.24	0	-4.58496	2.82015e-06	9.65308e-07	Ttll9	GO:0044238//primary metabolic process;GO:0019538//protein metabolic process;GO:0044237//cellular metabolic process;GO:0009987//cellular process;GO:0071704//organic substance metabolic process;GO:1901564//organonitrogen compound metabolic process;GO:0006464//cellular protein modification process;GO:0006807//nitrogen compound metabolic process;GO:0036211//protein modification process;GO:0043170//ma…	K16603//tubulin polyglutamylase TTLL9 [EC:6.-.-.-]
74008	0.47	0.02	-4.55459	8.04418e-07	2.6129e-07	Arsg	GO:0009987//cellular process;GO:0044237//cellular metabolic process;GO:0008152//metabolic process;GO:0006790//sulfur compound metabolic process;GO:0044421//extracellular region part;GO:0044464//cell part;GO:0044444//cytoplasmic part;GO:0043229//intracellular organelle;GO:0012505//endomembrane system;GO:0005615//extracellular space;GO:0043227//membrane-bounded organelle;GO:0005576//extracellular r…	K12381//arylsulfatase G [EC:3.1.6.-]+ko04142//Lysosome
338350	0.7	0.03	-4.54432	2.71778e-14	5.14416e-15	Acad12	GO:1901575//organic substance catabolic process;GO:0006631//fatty acid metabolic process;GO:0044242//cellular lipid catabolic process;GO:0044282//small molecule catabolic process;GO:0046395//carboxylic acid catabolic process;GO:0044281//small molecule metabolic process;GO:0008152//metabolic process;GO:0032787//monocarboxylic acid metabolic process;GO:0044248//cellular catabolic process;GO:0044255…	K11729//acyl-CoA dehydrogenase family member 10
105193	0.46	0.02	-4.52356	1.74247e-09	4.53998e-10	Nhlrc1	GO:0006807//nitrogen compound metabolic process;GO:0043632//modification-dependent macromolecule catabolic process;GO:0043412//macromolecule modification;GO:1903322//positive regulation of protein modification by small protein conjugation or removal;GO:0019222//regulation of metabolic process;GO:1901575//organic substance catabolic process;GO:0051247//positive regulation of protein metabolic proc…	K10602//E3 ubiquitin-protein ligase NHLRC1 [EC:2.3.2.27]+ko04120//Ubiquitin mediated proteolysis
106878	0.23	0	-4.52356	0.000455983	0.000204998	Smim3	GO:0016020//membrane;GO:0031224//intrinsic component of membrane;GO:0016021//integral component of membrane;GO:0044425//membrane part;
12503	0.23	0	-4.52356	5.22587e-05	2.06266e-05	Cd247	GO:0050789//regulation of biological process;GO:0002429//immune response-activating cell surface receptor signaling pathway;GO:0050852//T cell receptor signaling pathway;GO:0002250//adaptive immune response;GO:0002253//activation of immune response;GO:0002684//positive regulation of immune system process;GO:0070207//protein homotrimerization;GO:0044085//cellular component biogenesis;GO:0006461//p…	K06453//CD3Z antigen, zeta polypeptide+ko04650//Natural killer cell mediated cytotoxicity+ko04658//Th1 and Th2 cell differentiation+ko04659//Th17 cell differentiation+ko04660//T cell receptor signaling pathway+ko05142//Chagas disease (American trypanosomiasis);K06453//CD3Z antigen, zeta polypeptide+ko04650//Natural killer cell mediated cytotoxicity+ko04658//Th1 and Th2 cell differentiation+ko0465…
13607	0.23	0	-4.52356	4.92312e-13	1.00791e-13	Eda	GO:0032501//multicellular organismal process;GO:0030111//regulation of Wnt signaling pathway;GO:0060789//hair follicle placode formation;GO:0022612//gland morphogenesis;GO:0060255//regulation of macromolecule metabolic process;GO:0010556//regulation of macromolecule biosynthetic process;GO:0031323//regulation of cellular metabolic process;GO:0022404//molting cycle process;GO:0032880//regulation o…	K16628//collagen, type VII, alpha+ko04974//Protein digestion and absorption;K07603//collagen, type XVII, alpha+ko04974//Protein digestion and absorption
16591	0.23	0	-4.52356	1.2179e-05	4.46218e-06	Kl	GO:0006091//generation of precursor metabolites and energy;GO:0009987//cellular process;GO:0023056//positive regulation of signaling;GO:0032268//regulation of cellular protein metabolic process;GO:0008286//insulin receptor signaling pathway;GO:0070887//cellular response to chemical stimulus;GO:0010646//regulation of cell communication;GO:0009966//regulation of signal transduction;GO:0031325//posi…	K14756//klotho [EC:3.2.1.31]+ko00040//Pentose and glucuronate interconversions+ko04211//Longevity regulating pathway+ko04961//Endocrine and other factor-regulated calcium reabsorption+ko01100//Metabolic pathways+ko04928//Parathyroid hormone synthesis, secretion and action
217038	0.23	0	-4.52356	1.35644e-06	4.4898e-07	Mrm1	GO:0044085//cellular component biogenesis;GO:0043170//macromolecule metabolic process;GO:0031167//rRNA methylation;GO:0032259//methylation;GO:0022613//ribonucleoprotein complex biogenesis;GO:0034470//ncRNA processing;GO:0006725//cellular aromatic compound metabolic process;GO:0009451//RNA modification;GO:0010467//gene expression;GO:0046483//heterocycle metabolic process;GO:0044238//primary metabo…	K15507//21S rRNA (GM2251-2'-O)-methyltransferase [EC:2.1.1.-]
252830	0.23	0	-4.52356	0.000941275	0.000440746	Obox6	GO:0010556//regulation of macromolecule biosynthetic process;GO:0080090//regulation of primary metabolic process;GO:0009889//regulation of biosynthetic process;GO:0065007//biological regulation;GO:0031326//regulation of cellular biosynthetic process;GO:0019219//regulation of nucleobase-containing compound metabolic process;GO:0051171//regulation of nitrogen compound metabolic process;GO:0050789//…	K10164//homeobox protein Nanog+ko04550//Signaling pathways regulating pluripotency of stem cells+ko05205//Proteoglycans in cancer;K09337//cone-rod homeobox protein;K09320//homeobox even-skipped homolog protein
27060	0.23	0	-4.52356	3.1004e-07	9.71282e-08	Tcirg1	GO:0009260//ribonucleotide biosynthetic process;GO:0070070//proton-transporting V-type ATPase complex assembly;GO:0034622//cellular macromolecular complex assembly;GO:0044257//cellular protein catabolic process;GO:0065007//biological regulation;GO:0070071//proton-transporting two-sector ATPase complex assembly;GO:0070271//protein complex biogenesis;GO:0009199//ribonucleoside triphosphate metaboli…	K02154//V-type H+-transporting ATPase subunit a+ko04145//Phagosome+ko04142//Lysosome+ko04721//Synaptic vesicle cycle+ko05323//Rheumatoid arthritis+ko00190//Oxidative phosphorylation+ko05110//Vibrio cholerae infection+ko05120//Epithelial cell signaling in Helicobacter pylori infection+ko05152//Tuberculosis+ko04966//Collecting duct acid secretion+ko01100//Metabolic pathways+ko05165//Human papilloma…
67905	0.23	0	-4.52356	5.2167e-05	2.06266e-05	Ppm1m	GO:0016311//dephosphorylation;GO:0043412//macromolecule modification;GO:1901564//organonitrogen compound metabolic process;GO:0044238//primary metabolic process;GO:0009987//cellular process;GO:0006464//cellular protein modification process;GO:0008152//metabolic process;GO:0006796//phosphate-containing compound metabolic process;GO:0006470//protein dephosphorylation;GO:0044237//cellular metabolic …	K17507//protein phosphatase 1M [EC:3.1.3.16]
71684	0.23	0	-4.52356	2.52378e-05	9.59372e-06	Rbm43	GO:0003676//nucleic acid binding;GO:0003723//RNA binding;GO:0005488//binding;GO:1901363//heterocyclic compound binding;GO:0097159//organic cyclic compound binding;
71887	0.23	0	-4.52356	0.000107858	4.43474e-05	Ppm1j	GO:0006470//protein dephosphorylation;GO:0044260//cellular macromolecule metabolic process;GO:0008152//metabolic process;GO:0044238//primary metabolic process;GO:0009987//cellular process;GO:0071704//organic substance metabolic process;GO:0006796//phosphate-containing compound metabolic process;GO:0043170//macromolecule metabolic process;GO:0006807//nitrogen compound metabolic process;GO:0016311/…	K17504//protein phosphatase 1J [EC:3.1.3.16];K17504//protein phosphatase 1J [EC:3.1.3.16]
83490	0.23	0	-4.52356	3.67017e-09	9.83342e-10	Pik3ap1	GO:0034122//negative regulation of toll-like receptor signaling pathway;GO:0048518//positive regulation of biological process;GO:0002683//negative regulation of immune system process;GO:0002764//immune response-regulating signaling pathway;GO:0002682//regulation of immune system process;GO:0002376//immune system process;GO:0051716//cellular response to stimulus;GO:0048583//regulation of response …	K12230//phosphoinositide 3-kinase adapter protein 1+ko04662//B cell receptor signaling pathway+ko04151//PI3K-Akt signaling pathway
16828	0.67	0.03	-4.48113	8.72202e-10	2.223e-10	Ldha	GO:0019674//NAD metabolic process;GO:0072524//pyridine-containing compound metabolic process;GO:0007275//multicellular organism development;GO:0009161//ribonucleoside monophosphate metabolic process;GO:0051716//cellular response to stimulus;GO:0048731//system development;GO:0043067//regulation of programmed cell death;GO:0009199//ribonucleoside triphosphate metabolic process;GO:0009636//response …	K00016//L-lactate dehydrogenase [EC:1.1.1.27]+ko00010//Glycolysis / Gluconeogenesis+ko00640//Propanoate metabolism+ko00620//Pyruvate metabolism+ko01100//Metabolic pathways+ko00270//Cysteine and methionine metabolism+ko04922//Glucagon signaling pathway
19294	0.22	0	-4.45943	1.21685e-05	4.46218e-06	Nectin2	GO:0030154//cell differentiation;GO:0002858//regulation of natural killer cell mediated cytotoxicity directed against tumor cell target;GO:0045088//regulation of innate immune response;GO:0022610//biological adhesion;GO:0002860//positive regulation of natural killer cell mediated cytotoxicity directed against tumor cell target;GO:0002833//positive regulation of response to biotic stimulus;GO:0031…	K06531//poliovirus receptor-related protein 2+ko04514//Cell adhesion molecules (CAMs)+ko04520//Adherens junction+ko05168//Herpes simplex infection
20708	0.22	0	-4.45943	0.000107776	4.43474e-05	Serpinb6b	GO:0032268//regulation of cellular protein metabolic process;GO:0065007//biological regulation;GO:0032501//multicellular organismal process;GO:0048608//reproductive structure development;GO:0010951//negative regulation of endopeptidase activity;GO:0051246//regulation of protein metabolic process;GO:0051248//negative regulation of protein metabolic process;GO:0048523//negative regulation of cellul…	K13963//serpin B+ko05146//Amoebiasis
72136	0.22	0	-4.45943	2.52044e-05	9.59372e-06	Chst14	GO:0019538//protein metabolic process;GO:0044237//cellular metabolic process;GO:0009058//biosynthetic process;GO:0016053//organic acid biosynthetic process;GO:0050655//dermatan sulfate proteoglycan metabolic process;GO:0044238//primary metabolic process;GO:0032787//monocarboxylic acid metabolic process;GO:0030203//glycosaminoglycan metabolic process;GO:0005975//carbohydrate metabolic process;GO:0…	K08105//dermatan 4-sulfotransferase 1 [EC:2.8.2.35]+ko00532//Glycosaminoglycan biosynthesis - chondroitin sulfate / dermatan sulfate
21941	0.43	0.02	-4.42626	1.78996e-06	6.00944e-07	Tnfrsf8	GO:0061564//axon development;GO:0051960//regulation of nervous system development;GO:0010556//regulation of macromolecule biosynthetic process;GO:0031345//negative regulation of cell projection organization;GO:0006950//response to stress;GO:0104004//cellular response to environmental stimulus;GO:0048522//positive regulation of cellular process;GO:0048468//cell development;GO:0032760//positive reg…	K05145//tumor necrosis factor receptor superfamily member 8+ko04060//Cytokine-cytokine receptor interaction
100340	0.21	0	-4.39232	0.000107924	4.43474e-05	Smpdl3b	GO:0009056//catabolic process;GO:0006796//phosphate-containing compound metabolic process;GO:0032102//negative regulation of response to external stimulus;GO:0006643//membrane lipid metabolic process;GO:0006807//nitrogen compound metabolic process;GO:0034121//regulation of toll-like receptor signaling pathway;GO:0046434//organophosphate catabolic process;GO:0009966//regulation of signal transduct…	K01128//sphingomyelin phosphodiesterase acid-like 3 [EC:3.1.4.-]
12789	0.21	0	-4.39232	6.47679e-07	2.08826e-07	Cnga2	GO:0007608//sensory perception of smell;GO:0007606//sensory perception of chemical stimulus;GO:0007600//sensory perception;GO:0032501//multicellular organismal process;GO:0042391//regulation of membrane potential;GO:0003008//system process;GO:0065008//regulation of biological quality;GO:0050877//nervous system process;GO:0065007//biological regulation;GO:0050896//response to stimulus;GO:0044425//…	K04949//cyclic nucleotide gated channel alpha 2+ko04024//cAMP signaling pathway+ko04740//Olfactory transduction
13498	0.21	0.01	-4.39232	1.36107e-08	3.8347e-09	Atn1	GO:0060255//regulation of macromolecule metabolic process;GO:0009605//response to external stimulus;GO:0032504//multicellular organism reproduction;GO:0040011//locomotion;GO:0048731//system development;GO:0009890//negative regulation of biosynthetic process;GO:0048523//negative regulation of cellular process;GO:0050789//regulation of biological process;GO:0051179//localization;GO:0022414//reprodu…	K05626//atrophin-1 (dentatorubral-pallidoluysian atrophy protein)
16493	0.21	0.01	-4.39232	3.57677e-06	1.24008e-06	Kcna5	GO:0006875//cellular metal ion homeostasis;GO:0010959//regulation of metal ion transport;GO:0006812//cation transport;GO:0006979//response to oxidative stress;GO:0003012//muscle system process;GO:0051259//protein oligomerization;GO:0086019//cell-cell signaling involved in cardiac conduction;GO:0086065//cell communication involved in cardiac conduction;GO:0071804//cellular potassium ion transport;…	K04878//potassium voltage-gated channel Shaker-related subfamily A member 5
16511	0.21	0	-4.39232	1.47988e-07	4.51758e-08	Kcnh2	GO:0086003//cardiac muscle cell contraction;GO:0086005//ventricular cardiac muscle cell action potential;GO:0006813//potassium ion transport;GO:0099622//cardiac muscle cell membrane repolarization;GO:0050896//response to stimulus;GO:0042592//homeostatic process;GO:0006812//cation transport;GO:0015672//monovalent inorganic cation transport;GO:0060306//regulation of membrane repolarization;GO:00600…	K04905//potassium voltage-gated channel Eag-related subfamily H member 2
20319	0.21	0.01	-4.39232	0.000417328	0.000186119	Sfrp2	GO:0060173//limb development;GO:0043066//negative regulation of apoptotic process;GO:0010628//positive regulation of gene expression;GO:0046328//regulation of JNK cascade;GO:0009892//negative regulation of metabolic process;GO:0060349//bone morphogenesis;GO:0010557//positive regulation of macromolecule biosynthetic process;GO:0001933//negative regulation of protein phosphorylation;GO:0001569//bra…	K02176//secreted frizzled-related protein 2+ko04310//Wnt signaling pathway
252904	0.21	0	-4.39232	0.000222182	9.5347e-05	Vmn1r69	GO:0050896//response to stimulus;GO:0007606//sensory perception of chemical stimulus;GO:0032501//multicellular organismal process;GO:0007600//sensory perception;GO:0019236//response to pheromone;GO:0003008//system process;GO:0010033//response to organic substance;GO:0042221//response to chemical;GO:0050877//nervous system process;GO:0005886//plasma membrane;GO:0031224//intrinsic component of memb…	K04614//vomeronasal1 receptor
268591	0.21	0	-4.39232	2.52002e-05	9.59372e-06	Serpina5	GO:0048731//system development;GO:0048732//gland development;GO:0044092//negative regulation of molecular function;GO:0043086//negative regulation of catalytic activity;GO:0032504//multicellular organism reproduction;GO:0032501//multicellular organismal process;GO:0032502//developmental process;GO:0051704//multi-organism process;GO:0048609//multicellular organismal reproductive process;GO:0007276…	K03913//protein C inhibitor+ko04610//Complement and coagulation cascades
66959	0.21	0	-4.39232	0.000222313	9.5347e-05	Dusp26	GO:0051252//regulation of RNA metabolic process;GO:0044237//cellular metabolic process;GO:1903507//negative regulation of nucleic acid-templated transcription;GO:0050789//regulation of biological process;GO:0006469//negative regulation of protein kinase activity;GO:0006793//phosphorus metabolic process;GO:0051348//negative regulation of transferase activity;GO:0045785//positive regulation of cell…	K14165//atypical dual specificity phosphatase [EC:3.1.3.16 3.1.3.48]
83669	0.21	0.01	-4.39232	1.2897e-08	3.62628e-09	Wdr6	GO:0031323//regulation of cellular metabolic process;GO:0048519//negative regulation of biological process;GO:0010507//negative regulation of autophagy;GO:0009895//negative regulation of catabolic process;GO:0042127//regulation of cell proliferation;GO:0009894//regulation of catabolic process;GO:0051726//regulation of cell cycle;GO:0031329//regulation of cellular catabolic process;GO:0007049//cel…	K06711//hypoxia-inducible factor prolyl 4-hydroxylase [EC:1.14.11.-];K09008//NADH dehydrogenase [ubiquinone] 1 alpha subcomplex assembly factor 3+ko04714//Thermogenesis;K09291//nucleoprotein TPR+ko05216//Thyroid cancer+ko03013//RNA transport+ko05200//Pathways in cancer
103655	0.2	0.01	-4.32193	7.16842e-06	2.5545e-06	Sec14l4	GO:0005622//intracellular;GO:0016020//membrane;GO:0005623//cell;GO:0044464//cell part;GO:0044425//membrane part;GO:0031224//intrinsic component of membrane;GO:0016021//integral component of membrane;GO:0005488//binding;GO:0008289//lipid binding;GO:0005215//transporter activity;	K17981//mitochondrial fission process protein 1;K01019//galactosylceramide sulfotransferase [EC:2.8.2.11]+ko00600//Sphingolipid metabolism+ko00565//Ether lipid metabolism+ko01100//Metabolic pathways;K12850//pre-mRNA-splicing factor 38B+ko03040//Spliceosome;K19625//retinaldehyde-binding protein 1
12721	0.2	0	-4.32193	0.000456495	0.000204998	Coro1a	GO:0032501//multicellular organismal process;GO:0010639//negative regulation of organelle organization;GO:0048873//homeostasis of number of cells within a tissue;GO:0006887//exocytosis;GO:0010522//regulation of calcium ion transport into cytosol;GO:0001894//tissue homeostasis;GO:0060627//regulation of vesicle-mediated transport;GO:1901215//negative regulation of neuron death;GO:1990090//cellular …	K13882//coronin-1A+ko04145//Phagosome+ko05152//Tuberculosis
170720	0.2	0	-4.32193	7.06565e-08	2.1012e-08	Card14	GO:0019220//regulation of phosphate metabolic process;GO:0051173//positive regulation of nitrogen compound metabolic process;GO:0048518//positive regulation of biological process;GO:0071356//cellular response to tumor necrosis factor;GO:0065009//regulation of molecular function;GO:0043067//regulation of programmed cell death;GO:0060255//regulation of macromolecule metabolic process;GO:0010562//po…	K20913//caspase recruitment domain-containing protein 14+ko04064//NF-kappa B signaling pathway;K20913//caspase recruitment domain-containing protein 14+ko04064//NF-kappa B signaling pathway;K20913//caspase recruitment domain-containing protein 14+ko04064//NF-kappa B signaling pathway;K20913//caspase recruitment domain-containing protein 14+ko04064//NF-kappa B signaling pathway;K20913//caspase rec…
20186	0.2	0	-4.32193	0.000222607	9.5347e-05	Nr1h4	GO:0006725//cellular aromatic compound metabolic process;GO:0035774//positive regulation of insulin secretion involved in cellular response to glucose stimulus;GO:0045089//positive regulation of innate immune response;GO:0045764//positive regulation of cellular amino acid metabolic process;GO:1902679//negative regulation of RNA biosynthetic process;GO:0009058//biosynthetic process;GO:0009968//neg…	K08537//farnesoid X receptor+ko04976//Bile secretion
218581	0.2	0	-4.32193	2.51877e-05	9.59372e-06	Depdc1b	GO:0007165//signal transduction;GO:0023051//regulation of signaling;GO:0050789//regulation of biological process;GO:0051716//cellular response to stimulus;GO:0006928//movement of cell or subcellular component;GO:0040011//locomotion;GO:0010647//positive regulation of cell communication;GO:0030177//positive regulation of Wnt signaling pathway;GO:0023052//signaling;GO:0023056//positive regulation of…	K20640//Rho GTPase-activating protein 19
22778	0.2	0	-4.32193	3.66327e-09	9.83342e-10	Ikzf1	GO:0010629//negative regulation of gene expression;GO:0065003//macromolecular complex assembly;GO:0031324//negative regulation of cellular metabolic process;GO:0009987//cellular process;GO:0002520//immune system development;GO:0050789//regulation of biological process;GO:2000112//regulation of cellular macromolecule biosynthetic process;GO:0048519//negative regulation of biological process;GO:000…	K09220//IKAROS family zinc finger protein;K09220//IKAROS family zinc finger protein
63959	0.2	0	-4.32193	0.000107677	4.43474e-05	Slc29a1	GO:0009743//response to carbohydrate;GO:0070482//response to oxygen levels;GO:0007267//cell-cell signaling;GO:1901264//carbohydrate derivative transport;GO:0007275//multicellular organism development;GO:0098916//anterograde trans-synaptic signaling;GO:0030879//mammary gland development;GO:0042593//glucose homeostasis;GO:0099536//synaptic signaling;GO:0071310//cellular response to organic substanc…	K15014//solute carrier family 29 (equilibrative nucleoside transporter), member 1/2/3
66039	0.2	0	-4.32193	5.23005e-05	2.06266e-05	Tmem254a	GO:0016021//integral component of membrane;GO:0044425//membrane part;GO:0016020//membrane;GO:0031224//intrinsic component of membrane;
667060	0.2	0	-4.32193	1.21727e-05	4.46218e-06	Vmn2r5	GO:0044464//cell part;GO:0031224//intrinsic component of membrane;GO:0044425//membrane part;GO:0071944//cell periphery;GO:0016021//integral component of membrane;GO:0005623//cell;GO:0016020//membrane;GO:0005886//plasma membrane;GO:0038023//signaling receptor activity;GO:0004888//transmembrane signaling receptor activity;GO:0060089//molecular transducer activity;GO:0099600//transmembrane receptor …	K04613//vomeronasal 2 receptor
69195	0.2	0	-4.32193	0.000940136	0.000440746	Tmem121	GO:0016020//membrane;GO:0044425//membrane part;GO:0016021//integral component of membrane;GO:0031224//intrinsic component of membrane;	K11253//histone H3+ko05322//Systemic lupus erythematosus+ko05034//Alcoholism+ko05202//Transcriptional misregulation in cancer
71706	0.2	0	-4.32193	2.52253e-05	9.59372e-06	Slc46a3	GO:0051234//establishment of localization;GO:0006810//transport;GO:0055085//transmembrane transport;GO:0051179//localization;GO:0070062//extracellular exosome;GO:0043227//membrane-bounded organelle;GO:0031224//intrinsic component of membrane;GO:0043230//extracellular organelle;GO:0044421//extracellular region part;GO:0016021//integral component of membrane;GO:0043226//organelle;GO:0005615//extrac…	K20840//MFS transporter, PCFT/HCP family, solute carrier family 46, member 3
76560	2.2	0.11	-4.32193	6.86861e-34	5.87438e-35	Prss8	GO:0044464//cell part;GO:0005623//cell;GO:0044421//extracellular region part;GO:0005576//extracellular region;GO:0071944//cell periphery;GO:0005615//extracellular space;GO:0031982//vesicle;GO:0005886//plasma membrane;GO:1903561//extracellular vesicle;GO:0016020//membrane;GO:0070062//extracellular exosome;GO:0043230//extracellular organelle;GO:0043227//membrane-bounded organelle;GO:0043226//organe…	K08664//prostasin [EC:3.4.21.-];K09630//polyserase 2 [EC:3.4.21.-]
BGI_novel_G000410	4.28	0.22	-4.28204	2.32572e-32	2.08002e-33	BGI_novel_G000410		K14416//elongation factor 1 alpha-like protein+ko05134//Legionellosis+ko03015//mRNA surveillance pathway
75777	1.15	0.06	-4.26053	3.13631e-07	9.83918e-08	Ttc23l	GO:0005819//spindle;GO:0005856//cytoskeleton;GO:0044422//organelle part;GO:0043226//organelle;GO:0044430//cytoskeletal part;GO:0030496//midbody;GO:0015630//microtubule cytoskeleton;GO:0005815//microtubule organizing center;GO:0005737//cytoplasm;GO:0043229//intracellular organelle;GO:0043232//intracellular non-membrane-bounded organelle;GO:0005622//intracellular;GO:0005623//cell;GO:0043228//non-me…
100040885	0.19	0	-4.24793	0.000939883	0.000440746	Gm16427	GO:0065007//biological regulation;GO:0051172//negative regulation of nitrogen compound metabolic process;GO:0060255//regulation of macromolecule metabolic process;GO:0010468//regulation of gene expression;GO:0031327//negative regulation of cellular biosynthetic process;GO:0051171//regulation of nitrogen compound metabolic process;GO:0050793//regulation of developmental process;GO:0048518//positiv…	K10308//F-box protein 31;K14284//nuclear RNA export factor+ko03013//RNA transport+ko03015//mRNA surveillance pathway+ko03008//Ribosome biogenesis in eukaryotes+ko05164//Influenza A+ko05168//Herpes simplex infection
105663	0.19	0	-4.24793	2.82223e-06	9.65308e-07	Thtpa	GO:0006725//cellular aromatic compound metabolic process;GO:0006793//phosphorus metabolic process;GO:1901564//organonitrogen compound metabolic process;GO:0006790//sulfur compound metabolic process;GO:0051186//cofactor metabolic process;GO:0006766//vitamin metabolic process;GO:0044237//cellular metabolic process;GO:0006772//thiamine metabolic process;GO:0071704//organic substance metabolic proces…	K05307//thiamine-triphosphatase [EC:3.6.1.28]+ko00730//Thiamine metabolism+ko01100//Metabolic pathways
12672	0.19	0	-4.24793	2.81496e-06	9.65308e-07	Chrm4	GO:1901699//cellular response to nitrogen compound;GO:0032870//cellular response to hormone stimulus;GO:0007165//signal transduction;GO:0007213//G-protein coupled acetylcholine receptor signaling pathway;GO:0050789//regulation of biological process;GO:0007268//chemical synaptic transmission;GO:0007186//G-protein coupled receptor signaling pathway;GO:0007200//phospholipase C-activating G-protein c…	K04132//muscarinic acetylcholine receptor M4+ko04810//Regulation of actin cytoskeleton+ko04725//Cholinergic synapse+ko04080//Neuroactive ligand-receptor interaction
12774	0.19	0	-4.24793	1.35515e-06	4.4898e-07	Ccr5	GO:0070723//response to cholesterol;GO:2000106//regulation of leukocyte apoptotic process;GO:0006874//cellular calcium ion homeostasis;GO:0006955//immune response;GO:0040011//locomotion;GO:0019722//calcium-mediated signaling;GO:0010941//regulation of cell death;GO:0006935//chemotaxis;GO:0006812//cation transport;GO:0019932//second-messenger-mediated signaling;GO:0050789//regulation of biological …	K04180//C-C chemokine receptor type 5+ko04144//Endocytosis+ko05145//Toxoplasmosis+ko05203//Viral carcinogenesis+ko04062//Chemokine signaling pathway+ko04060//Cytokine-cytokine receptor interaction+ko05163//Human cytomegalovirus infection+ko05167//Kaposi's sarcoma-associated herpesvirus infection
13038	0.19	0	-4.24793	0.000941022	0.000440746	Ctsk	GO:0010822//positive regulation of mitochondrion organization;GO:0051050//positive regulation of transport;GO:0019222//regulation of metabolic process;GO:0051603//proteolysis involved in cellular protein catabolic process;GO:0001957//intramembranous ossification;GO:0006508//proteolysis;GO:0044248//cellular catabolic process;GO:0032388//positive regulation of intracellular transport;GO:1901564//or…	K01371//cathepsin K [EC:3.4.22.38]+ko04142//Lysosome+ko04210//Apoptosis+ko04380//Osteoclast differentiation+ko04620//Toll-like receptor signaling pathway+ko05323//Rheumatoid arthritis
13829	0.19	0	-4.24793	5.87708e-06	2.07542e-06	Dmtn	GO:0001933//negative regulation of protein phosphorylation;GO:0010763//positive regulation of fibroblast migration;GO:0048869//cellular developmental process;GO:1900046//regulation of hemostasis;GO:0070271//protein complex biogenesis;GO:0010543//regulation of platelet activation;GO:0032269//negative regulation of cellular protein metabolic process;GO:0014070//response to organic cyclic compound;G…	K07520//actin-binding LIM protein+ko04360//Axon guidance
208647	0.38	0.02	-4.24793	2.07812e-09	5.45776e-10	Creb3l2	GO:1903506//regulation of nucleic acid-templated transcription;GO:0048193//Golgi vesicle transport;GO:0071310//cellular response to organic substance;GO:0050794//regulation of cellular process;GO:0009987//cellular process;GO:0007165//signal transduction;GO:0065007//biological regulation;GO:0031328//positive regulation of cellular biosynthetic process;GO:0032502//developmental process;GO:1903508//…	K09048//cyclic AMP-responsive element-binding protein 3+ko04024//cAMP signaling pathway+ko04022//cGMP-PKG signaling pathway+ko04211//Longevity regulating pathway+ko04918//Thyroid hormone synthesis+ko04916//Melanogenesis+ko04915//Estrogen signaling pathway+ko04911//Insulin secretion+ko04728//Dopaminergic synapse+ko04725//Cholinergic synapse+ko05034//Alcoholism+ko05031//Amphetamine addiction+ko0503…
208650	0.19	0	-4.24793	1.11267e-13	2.18042e-14	Cblb	GO:0019220//regulation of phosphate metabolic process;GO:0050672//negative regulation of lymphocyte proliferation;GO:0051174//regulation of phosphorus metabolic process;GO:0002694//regulation of leukocyte activation;GO:0051173//positive regulation of nitrogen compound metabolic process;GO:0051250//negative regulation of lymphocyte activation;GO:0048518//positive regulation of biological process;G…	K22517//E3 ubiquitin-protein ligase CBL-B [EC:2.3.2.27]+ko04144//Endocytosis+ko04910//Insulin signaling pathway+ko04625//C-type lectin receptor signaling pathway+ko04660//T cell receptor signaling pathway+ko04120//Ubiquitin mediated proteolysis+ko04012//ErbB signaling pathway+ko05162//Measles;K22517//E3 ubiquitin-protein ligase CBL-B [EC:2.3.2.27]+ko04144//Endocytosis+ko04910//Insulin signaling p…
228785	0.19	0	-4.24793	0.000107627	4.43474e-05	Mylk2	GO:0007275//multicellular organism development;GO:0048729//tissue morphogenesis;GO:0010468//regulation of gene expression;GO:0014706//striated muscle tissue development;GO:0009987//cellular process;GO:0055008//cardiac muscle tissue morphogenesis;GO:0044238//primary metabolic process;GO:0009893//positive regulation of metabolic process;GO:0018107//peptidyl-threonine phosphorylation;GO:0007267//cel…	K00907//myosin-light-chain kinase [EC:2.7.11.18]+ko04022//cGMP-PKG signaling pathway+ko04020//Calcium signaling pathway+ko04810//Regulation of actin cytoskeleton+ko04510//Focal adhesion+ko04611//Platelet activation+ko04971//Gastric acid secretion+ko04371//Apelin signaling pathway+ko04270//Vascular smooth muscle contraction+ko04921//Oxytocin signaling pathway
26903	0.19	0	-4.24793	8.36716e-10	2.12728e-10	Dysf	GO:0016192//vesicle-mediated transport;GO:0042060//wound healing;GO:0006906//vesicle fusion;GO:0061025//membrane fusion;GO:0001778//plasma membrane repair;GO:0032501//multicellular organismal process;GO:0003012//muscle system process;GO:0006950//response to stress;GO:0061024//membrane organization;GO:0048284//organelle fusion;GO:0051179//localization;GO:0009611//response to wounding;GO:0090174//o…	K18261//dysferlin
56868	0.19	0	-4.24793	0.000107842	4.43474e-05	Psg23	GO:0065007//biological regulation;GO:0065008//regulation of biological quality;GO:0000003//reproduction;GO:0010628//positive regulation of gene expression;GO:0061041//regulation of wound healing;GO:1900047//negative regulation of hemostasis;GO:1903035//negative regulation of response to wounding;GO:0051239//regulation of multicellular organismal process;GO:0010604//positive regulation of macromol…	K06499//carcinoembryonic antigen-related cell adhesion molecule
64452	0.19	0	-4.24793	0.000107792	4.43474e-05	Slc5a4a	GO:0006811//ion transport;GO:0015672//monovalent inorganic cation transport;GO:0006814//sodium ion transport;GO:0006818//hydrogen transport;GO:0034219//carbohydrate transmembrane transport;GO:0008643//carbohydrate transport;GO:0015749//monosaccharide transport;GO:0071702//organic substance transport;GO:1905950//monosaccharide transmembrane transport;GO:0035428//hexose transmembrane transport;GO:0…	K14384//solute carrier family 5 (low affinity sodium-glucose cotransporter), member 4
66745	0.19	0	-4.24793	5.21753e-05	2.06266e-05	Trpd52l3
69890	0.19	0	-4.24793	5.88128e-06	2.07542e-06	Zfp219	GO:0031326//regulation of cellular biosynthetic process;GO:0000122//negative regulation of transcription from RNA polymerase II promoter;GO:0009891//positive regulation of biosynthetic process;GO:0006355//regulation of transcription, DNA-templated;GO:0018130//heterocycle biosynthetic process;GO:0048518//positive regulation of biological process;GO:0019222//regulation of metabolic process;GO:00063…	K09228//KRAB domain-containing zinc finger protein
71449	0.19	0.01	-4.24793	2.816e-05	1.07756e-05	Mettl13	GO:0016741//transferase activity, transferring one-carbon groups;GO:0003824//catalytic activity;GO:0016740//transferase activity;GO:0008168//methyltransferase activity;	K08513//vesicle-associated membrane protein 4+ko04130//SNARE interactions in vesicular transport;K01415//endothelin-converting enzyme [EC:3.4.24.71]
78267	0.19	0	-4.24793	0.000941149	0.000440746	Klhdc8b	GO:0006807//nitrogen compound metabolic process;GO:0044260//cellular macromolecule metabolic process;GO:0007049//cell cycle;GO:0009987//cellular process;GO:0070647//protein modification by small protein conjugation or removal;GO:0016567//protein ubiquitination;GO:0036211//protein modification process;GO:0044237//cellular metabolic process;GO:0019538//protein metabolic process;GO:0051301//cell div…	K15046//influenza virus NS1A-binding protein+ko05164//Influenza A;K10446//kelch-like protein 8;K13956//actin-binding protein IPP;K10442//kelch-like protein 1/4/5;K13956//actin-binding protein IPP;K10442//kelch-like protein 1/4/5;K10442//kelch-like protein 1/4/5;K13956//actin-binding protein IPP;K10442//kelch-like protein 1/4/5
BGI_novel_G000420	1.1	0.06	-4.1964	0.000214658	9.16984e-05	BGI_novel_G000420	GO:0043228//non-membrane-bounded organelle;GO:0044424//intracellular part;GO:0032991//macromolecular complex;GO:1990904//ribonucleoprotein complex;GO:0043229//intracellular organelle;GO:0044464//cell part;GO:0005623//cell;GO:0030529//intracellular ribonucleoprotein complex;GO:0043232//intracellular non-membrane-bounded organelle;GO:0005622//intracellular;GO:0005737//cytoplasm;GO:0005840//ribosome…	K02937//large subunit ribosomal protein L7e+ko03010//Ribosome
101055983	0.18	0	-4.16993	4.92464e-13	1.00791e-13	Gm14569		K11294//nucleolin+ko05130//Pathogenic Escherichia coli infection;K04573//neurofilament medium polypeptide (neurofilament 3)+ko05014//Amyotrophic lateral sclerosis (ALS);K17552//protein phosphatase 1 regulatory subunit 10;K11294//nucleolin+ko05130//Pathogenic Escherichia coli infection;K03243//translation initiation factor 5B+ko03013//RNA transport;K04573//neurofilament medium polypeptide (neurofi…
12266	0.18	0.01	-4.16993	5.55288e-05	2.20574e-05	C3	GO:0006911//phagocytosis, engulfment;GO:1905952//regulation of lipid localization;GO:0002703//regulation of leukocyte mediated immunity;GO:0002705//positive regulation of leukocyte mediated immunity;GO:0032501//multicellular organismal process;GO:0010827//regulation of glucose transport;GO:2000427//positive regulation of apoptotic cell clearance;GO:0010954//positive regulation of protein processi…	K03990//complement component 3+ko04145//Phagosome+ko05134//Legionellosis+ko05133//Pertussis+ko05322//Systemic lupus erythematosus+ko04610//Complement and coagulation cascades+ko05142//Chagas disease (American trypanosomiasis)+ko05140//Leishmaniasis+ko05203//Viral carcinogenesis+ko05150//Staphylococcus aureus infection+ko05152//Tuberculosis+ko05167//Kaposi's sarcoma-associated herpesvirus infectio…
12334	0.18	0.01	-4.16993	1.42246e-05	5.25202e-06	Capn2	GO:0044238//primary metabolic process;GO:0006508//proteolysis;GO:0044265//cellular macromolecule catabolic process;GO:0044260//cellular macromolecule metabolic process;GO:0016485//protein processing;GO:0044237//cellular metabolic process;GO:0050794//regulation of cellular process;GO:0050896//response to stimulus;GO:0071230//cellular response to amino acid stimulus;GO:0030154//cell differentiation…	K03853//calpain-2 [EC:3.4.22.53]+ko04141//Protein processing in endoplasmic reticulum+ko04510//Focal adhesion+ko04217//Necroptosis+ko04210//Apoptosis+ko04218//Cellular senescence+ko05010//Alzheimer's disease
18197	0.18	0	-4.16993	0.00010771	4.43474e-05	Nsg2	GO:0007186//G-protein coupled receptor signaling pathway;GO:0070271//protein complex biogenesis;GO:0051716//cellular response to stimulus;GO:0065003//macromolecular complex assembly;GO:0046907//intracellular transport;GO:0007212//dopamine receptor signaling pathway;GO:0016197//endosomal transport;GO:0022607//cellular component assembly;GO:0034622//cellular macromolecular complex assembly;GO:00650…
18416	0.18	0	-4.16993	5.22253e-05	2.06266e-05	Otc	GO:0009605//response to external stimulus;GO:0019627//urea metabolic process;GO:0044085//cellular component biogenesis;GO:1901605//alpha-amino acid metabolic process;GO:0014070//response to organic cyclic compound;GO:0007584//response to nutrient;GO:0009719//response to endogenous stimulus;GO:1901565//organonitrogen compound catabolic process;GO:0042493//response to drug;GO:0065007//biological re…	K00611//ornithine carbamoyltransferase [EC:2.1.3.3]+ko01230//Biosynthesis of amino acids+ko00220//Arginine biosynthesis+ko01100//Metabolic pathways
19291	0.18	0	-4.16993	1.39725e-17	2.2349e-18	Purb	GO:0080090//regulation of primary metabolic process;GO:0050794//regulation of cellular process;GO:0044249//cellular biosynthetic process;GO:0030154//cell differentiation;GO:0031326//regulation of cellular biosynthetic process;GO:0045934//negative regulation of nucleobase-containing compound metabolic process;GO:1901360//organic cyclic compound metabolic process;GO:0034641//cellular nitrogen compo…	K21799//transcriptional activator protein Pur-beta
211286	0.18	0	-4.16993	2.5196e-05	9.59372e-06	Cln5	GO:0055067//monovalent inorganic cation homeostasis;GO:0050877//nervous system process;GO:0044237//cellular metabolic process;GO:0032501//multicellular organismal process;GO:0006873//cellular ion homeostasis;GO:1904426//positive regulation of GTP binding;GO:0006996//organelle organization;GO:0009987//cellular process;GO:0006885//regulation of pH;GO:0051179//localization;GO:0043170//macromolecule …	K12390//ceroid-lipofuscinosis neuronal protein 5+ko04142//Lysosome
211550	0.18	0	-4.16993	0.000107825	4.43474e-05	Tifa	GO:0051716//cellular response to stimulus;GO:0007165//signal transduction;GO:0009987//cellular process;GO:0050896//response to stimulus;GO:0050794//regulation of cellular process;GO:0007154//cell communication;GO:0035556//intracellular signal transduction;GO:0007249//I-kappaB kinase/NF-kappaB signaling;GO:0065007//biological regulation;GO:0023052//signaling;GO:0050789//regulation of biological pr…
212632	0.18	0.01	-4.16993	4.35948e-08	1.27636e-08	Iffo2	GO:0044464//cell part;GO:0005856//cytoskeleton;GO:0005622//intracellular;GO:0043229//intracellular organelle;GO:0045111//intermediate filament cytoskeleton;GO:0005882//intermediate filament;GO:0099081//supramolecular polymer;GO:0005623//cell;GO:0043232//intracellular non-membrane-bounded organelle;GO:0099512//supramolecular fiber;GO:0043226//organelle;GO:0099080//supramolecular complex;GO:0099513…
242235	0.18	0	-4.16993	0.000222019	9.5347e-05	Lrit3	GO:0050896//response to stimulus;GO:0040036//regulation of fibroblast growth factor receptor signaling pathway;GO:0009966//regulation of signal transduction;GO:0048583//regulation of response to stimulus;GO:0007601//visual perception;GO:0023051//regulation of signaling;GO:0065007//biological regulation;GO:0010646//regulation of cell communication;GO:0050953//sensory perception of light stimulus;G…	K16357//leucine-rich repeat and fibronectin type-III domain-containing protein 4;K16358//leucine-rich repeat and fibronectin type-III domain-containing protein 5
383075	0.18	0	-4.16993	0.000456687	0.000204998	Enthd1		K12471//epsin+ko04144//Endocytosis;K12471//epsin+ko04144//Endocytosis;K12471//epsin+ko04144//Endocytosis;K12471//epsin+ko04144//Endocytosis
51799	0.18	0	-4.16993	2.52169e-05	9.59372e-06	Rundc3a	GO:1900371//regulation of purine nucleotide biosynthetic process;GO:0030810//positive regulation of nucleotide biosynthetic process;GO:0010562//positive regulation of phosphorus metabolic process;GO:0050789//regulation of biological process;GO:0030808//regulation of nucleotide biosynthetic process;GO:0045935//positive regulation of nucleobase-containing compound metabolic process;GO:0031326//regu…	K05659//ATP-binding cassette, subfamily B (MDR/TAP), member 4 [EC:3.6.3.44]+ko04976//Bile secretion+ko02010//ABC transporters;K12482//RUN and FYVE domain-containing protein 1+ko04144//Endocytosis;K05659//ATP-binding cassette, subfamily B (MDR/TAP), member 4 [EC:3.6.3.44]+ko04976//Bile secretion+ko02010//ABC transporters;K12482//RUN and FYVE domain-containing protein 1+ko04144//Endocytosis
56847	0.18	0	-4.16993	3.10165e-07	9.71282e-08	Aldh1a3	GO:0032502//developmental process;GO:0048729//tissue morphogenesis;GO:0021537//telencephalon development;GO:0043067//regulation of programmed cell death;GO:0070384//Harderian gland development;GO:0060324//face development;GO:0009605//response to external stimulus;GO:0048562//embryonic organ morphogenesis;GO:0002138//retinoic acid biosynthetic process;GO:0051259//protein oligomerization;GO:0001654…	K00129//aldehyde dehydrogenase (NAD(P)+) [EC:1.2.1.5]+ko00410//beta-Alanine metabolism+ko00980//Metabolism of xenobiotics by cytochrome P450+ko00982//Drug metabolism - cytochrome P450+ko00340//Histidine metabolism+ko00010//Glycolysis / Gluconeogenesis+ko05204//Chemical carcinogenesis+ko00360//Phenylalanine metabolism+ko00350//Tyrosine metabolism+ko01100//Metabolic pathways
69539	0.18	0	-4.16993	0.000939377	0.000440746	Trnp1	GO:0061351//neural precursor cell proliferation;GO:0032774//RNA biosynthetic process;GO:0021695//cerebellar cortex development;GO:0009059//macromolecule biosynthetic process;GO:1901576//organic substance biosynthetic process;GO:0008283//cell proliferation;GO:0022037//metencephalon development;GO:0009653//anatomical structure morphogenesis;GO:0048731//system development;GO:2000112//regulation of c…	K03129//transcription initiation factor TFIID subunit 4+ko03022//Basal transcription factors+ko05016//Huntington's disease+ko05168//Herpes simplex infection
72691	0.18	0	-4.16993	0.000222149	9.5347e-05	Calhm2	GO:0051179//localization;GO:0034220//ion transmembrane transport;GO:0006810//transport;GO:0006811//ion transport;GO:0055085//transmembrane transport;GO:0051234//establishment of localization;GO:0005887//integral component of plasma membrane;GO:0005886//plasma membrane;GO:0071944//cell periphery;GO:0031226//intrinsic component of plasma membrane;GO:0044459//plasma membrane part;GO:0044464//cell pa…	K19739//calcium homeostasis modulator protein 2
73341	0.18	0	-4.16993	3.66758e-09	9.83342e-10	Arhgef6	GO:0007154//cell communication;GO:0023051//regulation of signaling;GO:0030032//lamellipodium assembly;GO:0030031//cell projection assembly;GO:0030030//cell projection organization;GO:0097581//lamellipodium organization;GO:0023052//signaling;GO:0035023//regulation of Rho protein signal transduction;GO:0051716//cellular response to stimulus;GO:0044085//cellular component biogenesis;GO:0050789//regu…	K05729//Rho guanine nucleotide exchange factor 6+ko04810//Regulation of actin cytoskeleton+ko05212//Pancreatic cancer;K05729//Rho guanine nucleotide exchange factor 6+ko04810//Regulation of actin cytoskeleton+ko05212//Pancreatic cancer;K05729//Rho guanine nucleotide exchange factor 6+ko04810//Regulation of actin cytoskeleton+ko05212//Pancreatic cancer
77595	0.18	0	-4.16993	1.7537e-09	4.57366e-10	Nup210l	GO:0051704//multi-organism process;GO:0032504//multicellular organism reproduction;GO:0002064//epithelial cell development;GO:0032501//multicellular organismal process;GO:0019953//sexual reproduction;GO:0060009//Sertoli cell development;GO:0009987//cellular process;GO:0048232//male gamete generation;GO:0046546//development of primary male sexual characteristics;GO:0007276//gamete generation;GO:00…	K14314//nuclear pore complex protein Nup210+ko03013//RNA transport;K14314//nuclear pore complex protein Nup210+ko03013//RNA transport;K14314//nuclear pore complex protein Nup210+ko03013//RNA transport;K14314//nuclear pore complex protein Nup210+ko03013//RNA transport;K14314//nuclear pore complex protein Nup210+ko03013//RNA transport;K14314//nuclear pore complex protein Nup210+ko03013//RNA transpo…
107022	0.17	0	-4.08746	5.22503e-05	2.06266e-05	Gramd3	GO:0099081//supramolecular polymer;GO:0043232//intracellular non-membrane-bounded organelle;GO:0044422//organelle part;GO:0005737//cytoplasm;GO:0005856//cytoskeleton;GO:0005874//microtubule;GO:0099513//polymeric cytoskeletal fiber;GO:0016021//integral component of membrane;GO:0043229//intracellular organelle;GO:0044444//cytoplasmic part;GO:0005623//cell;GO:0043228//non-membrane-bounded organelle;…	K05039//solute carrier family 6 (neurotransmitter transporter, GABA) member 6/8/11/12/13;K19951//TBC1 domain family member 8/9
15410	0.17	0.01	-4.08746	2.81554e-05	1.07756e-05	Hoxb3	GO:0080090//regulation of primary metabolic process;GO:0009889//regulation of biosynthetic process;GO:0044260//cellular macromolecule metabolic process;GO:0006351//transcription, DNA-templated;GO:0010629//negative regulation of gene expression;GO:0051252//regulation of RNA metabolic process;GO:0048513//animal organ development;GO:0034654//nucleobase-containing compound biosynthetic process;GO:000…	K09303//homeobox protein HoxA/B/D3
17306	0.17	0	-4.08746	1.35721e-06	4.4898e-07	Sypl2	GO:0006873//cellular ion homeostasis;GO:0006875//cellular metal ion homeostasis;GO:0060322//head development;GO:0048878//chemical homeostasis;GO:0009987//cellular process;GO:0072507//divalent inorganic cation homeostasis;GO:0007275//multicellular organism development;GO:0007417//central nervous system development;GO:0098771//inorganic ion homeostasis;GO:0065008//regulation of biological quality;G…	K14168//cytoplasmic tRNA 2-thiolation protein 1 [EC:2.7.7.-]+ko04122//Sulfur relay system;K11318//ataxin-7;K13172//serine/arginine repetitive matrix protein 2
19414	0.17	0.01	-4.08746	4.42824e-07	1.40458e-07	Rasa3	GO:0035556//intracellular signal transduction;GO:0009987//cellular process;GO:0010648//negative regulation of cell communication;GO:0046578//regulation of Ras protein signal transduction;GO:0048583//regulation of response to stimulus;GO:0048519//negative regulation of biological process;GO:0046580//negative regulation of Ras protein signal transduction;GO:0006950//response to stress;GO:0048585//n…	K12380//Ras GTPase-activating protein 3+ko04013//MAPK signaling pathway - fly+ko04014//Ras signaling pathway
212541	0.17	0	-4.08746	7.66361e-09	2.1142e-09	Rho	GO:0071482//cellular response to light stimulus;GO:0048856//anatomical structure development;GO:0009416//response to light stimulus;GO:0009605//response to external stimulus;GO:0001654//eye development;GO:0007165//signal transduction;GO:0044267//cellular protein metabolic process;GO:0065008//regulation of biological quality;GO:0043010//camera-type eye development;GO:0001894//tissue homeostasis;GO…	K04250//rhodopsin+ko04744//Phototransduction
213435	0.17	0	-4.08746	2.52086e-05	9.59372e-06	Mylk3	GO:0051149//positive regulation of muscle cell differentiation;GO:0018209//peptidyl-serine modification;GO:0055001//muscle cell development;GO:0048731//system development;GO:0055007//cardiac muscle cell differentiation;GO:0030154//cell differentiation;GO:0044238//primary metabolic process;GO:0044087//regulation of cellular component biogenesis;GO:0018193//peptidyl-amino acid modification;GO:19021…	K00907//myosin-light-chain kinase [EC:2.7.11.18]+ko04022//cGMP-PKG signaling pathway+ko04020//Calcium signaling pathway+ko04810//Regulation of actin cytoskeleton+ko04510//Focal adhesion+ko04611//Platelet activation+ko04971//Gastric acid secretion+ko04371//Apelin signaling pathway+ko04270//Vascular smooth muscle contraction+ko04921//Oxytocin signaling pathway
237988	0.17	0	-4.08746	6.47806e-07	2.08826e-07	Cdr2l		K16756//coiled-coil domain-containing protein 64;K10388//plectin
56546	0.17	0	-4.08746	5.22169e-05	2.06266e-05	Sec1	GO:0005975//carbohydrate metabolic process;GO:0044238//primary metabolic process;GO:0043413//macromolecule glycosylation;GO:1901564//organonitrogen compound metabolic process;GO:0070085//glycosylation;GO:1901566//organonitrogen compound biosynthetic process;GO:0009100//glycoprotein metabolic process;GO:0044260//cellular macromolecule metabolic process;GO:0071704//organic substance metabolic proce…	K00718//galactoside 2-L-fucosyltransferase 1/2 [EC:2.4.1.69]+ko00603//Glycosphingolipid biosynthesis - globo and isoglobo series+ko00601//Glycosphingolipid biosynthesis - lacto and neolacto series+ko01100//Metabolic pathways
66717	0.17	0	-4.08746	3.1029e-07	9.71282e-08	Ccdc96	GO:0043229//intracellular organelle;GO:0044422//organelle part;GO:0043232//intracellular non-membrane-bounded organelle;GO:0044446//intracellular organelle part;GO:0044430//cytoskeletal part;GO:0044464//cell part;GO:0015630//microtubule cytoskeleton;GO:0043226//organelle;GO:0005856//cytoskeleton;GO:0005622//intracellular;GO:0005815//microtubule organizing center;GO:0005623//cell;GO:0005737//cytop…	K19607//X-linked retinitis pigmentosa GTPase regulator
68267	0.84	0.05	-4.07039	2.64386e-17	4.28888e-18	Slc25a22	GO:0015813//L-glutamate transport;GO:0006811//ion transport;GO:0015807//L-amino acid transport;GO:0006836//neurotransmitter transport;GO:0015893//drug transport;GO:0015711//organic anion transport;GO:0050896//response to stimulus;GO:0006820//anion transport;GO:0006810//transport;GO:0015849//organic acid transport;GO:0006865//amino acid transport;GO:0015800//acidic amino acid transport;GO:0042221/…	K15107//solute carrier family 25 (mitochondrial glutamate transporter), member 18/22
14792	1.65	0.1	-4.04439	2.60947e-29	2.60042e-30	Lpcat3	GO:1901576//organic substance biosynthetic process;GO:0071704//organic substance metabolic process;GO:0006629//lipid metabolic process;GO:0065007//biological regulation;GO:0097006//regulation of plasma lipoprotein particle levels;GO:0044255//cellular lipid metabolic process;GO:0009058//biosynthetic process;GO:0006793//phosphorus metabolic process;GO:0044238//primary metabolic process;GO:0008152//…	K13515//lysophospholipid acyltransferase 5 [EC:2.3.1.23 2.3.1.-]+ko04216//Ferroptosis+ko00564//Glycerophospholipid metabolism
215303	0.33	0.02	-4.04439	4.11032e-07	1.29933e-07	Camk1g	GO:0007154//cell communication;GO:0071704//organic substance metabolic process;GO:0044260//cellular macromolecule metabolic process;GO:0044267//cellular protein metabolic process;GO:0065007//biological regulation;GO:0006796//phosphate-containing compound metabolic process;GO:0044238//primary metabolic process;GO:0018107//peptidyl-threonine phosphorylation;GO:0023052//signaling;GO:0043412//macromo…	K08794//calcium/calmodulin-dependent protein kinase I [EC:2.7.11.17]+ko04921//Oxytocin signaling pathway+ko04925//Aldosterone synthesis and secretion
67603	0.66	0.04	-4.04439	8.60115e-16	1.5092e-16	Dusp6	GO:0010648//negative regulation of cell communication;GO:0045859//regulation of protein kinase activity;GO:0043065//positive regulation of apoptotic process;GO:0043407//negative regulation of MAP kinase activity;GO:0045995//regulation of embryonic development;GO:0009892//negative regulation of metabolic process;GO:0070372//regulation of ERK1 and ERK2 cascade;GO:0043170//macromolecule metabolic pr…	K21946//dual specificity phosphatase 6 [EC:3.1.3.16 3.1.3.48]+ko05202//Transcriptional misregulation in cancer+ko04010//MAPK signaling pathway+ko05221//Acute myeloid leukemia
15485	0.65	0.04	-4.02237	1.36077e-08	3.8347e-09	Hsd17b1	GO:0010817//regulation of hormone levels;GO:0006694//steroid biosynthetic process;GO:0008610//lipid biosynthetic process;GO:0044237//cellular metabolic process;GO:0044283//small molecule biosynthetic process;GO:0065008//regulation of biological quality;GO:0010038//response to metal ion;GO:0010035//response to inorganic substance;GO:0006629//lipid metabolic process;GO:0048856//anatomical structure…	K00044//17beta-estradiol 17-dehydrogenase [EC:1.1.1.62]+ko04913//Ovarian steroidogenesis+ko00140//Steroid hormone biosynthesis+ko01100//Metabolic pathways
114615	0.16	0	-4	3.66586e-09	9.83342e-10	Elac1	GO:0005623//cell;GO:0043229//intracellular organelle;GO:0005737//cytoplasm;GO:0005829//cytosol;GO:0044444//cytoplasmic part;GO:0043226//organelle;GO:0044464//cell part;GO:0005634//nucleus;GO:0043227//membrane-bounded organelle;GO:0044424//intracellular part;GO:0043231//intracellular membrane-bounded organelle;GO:0005622//intracellular;GO:0005488//binding;GO:0003824//catalytic activity;GO:0004519/…	K00784//ribonuclease Z [EC:3.1.26.11]+ko03013//RNA transport
18519	0.16	0	-4	1.47927e-07	4.51758e-08	Kat2b	GO:0001932//regulation of protein phosphorylation;GO:0031323//regulation of cellular metabolic process;GO:0061647//histone H3-K9 modification;GO:0010675//regulation of cellular carbohydrate metabolic process;GO:0009058//biosynthetic process;GO:0036211//protein modification process;GO:0043086//negative regulation of catalytic activity;GO:0051252//regulation of RNA metabolic process;GO:0043966//his…	K06062//histone acetyltransferase [EC:2.3.1.48]+ko04919//Thyroid hormone signaling pathway+ko05203//Viral carcinogenesis+ko04330//Notch signaling pathway+ko05166//HTLV-I infection
20788	0.32	0.02	-4	1.28084e-12	2.69094e-13	Srebf2	GO:0050789//regulation of biological process;GO:0031324//negative regulation of cellular metabolic process;GO:0016125//sterol metabolic process;GO:0010605//negative regulation of macromolecule metabolic process;GO:0033157//regulation of intracellular protein transport;GO:0006066//alcohol metabolic process;GO:0051130//positive regulation of cellular component organization;GO:0016070//RNA metabolic…	K09107//sterol regulatory element-binding transcription factor 2
21408	0.16	0	-4	6.47553e-07	2.08826e-07	Zfp354a	GO:0045934//negative regulation of nucleobase-containing compound metabolic process;GO:0044260//cellular macromolecule metabolic process;GO:0010033//response to organic substance;GO:0051593//response to folic acid;GO:0072001//renal system development;GO:0050794//regulation of cellular process;GO:0009890//negative regulation of biosynthetic process;GO:0097659//nucleic acid-templated transcription;…	K09228//KRAB domain-containing zinc finger protein
234724	0.16	0	-4	0.000107891	4.43474e-05	Tat	GO:0010033//response to organic substance;GO:1901564//organonitrogen compound metabolic process;GO:0017144//drug metabolic process;GO:0006559//L-phenylalanine catabolic process;GO:0009072//aromatic amino acid family metabolic process;GO:0009064//glutamine family amino acid metabolic process;GO:0009719//response to endogenous stimulus;GO:0048545//response to steroid hormone;GO:1901575//organic sub…	K00815//tyrosine aminotransferase [EC:2.6.1.5]+ko01230//Biosynthesis of amino acids+ko00400//Phenylalanine, tyrosine and tryptophan biosynthesis+ko00360//Phenylalanine metabolism+ko00130//Ubiquinone and other terpenoid-quinone biosynthesis+ko00350//Tyrosine metabolism+ko01100//Metabolic pathways+ko00270//Cysteine and methionine metabolism
240185	0.16	0.01	-4	3.05726e-09	8.13148e-10	9430020K01Rik	GO:0031323//regulation of cellular metabolic process;GO:0001936//regulation of endothelial cell proliferation;GO:0023056//positive regulation of signaling;GO:1900746//regulation of vascular endothelial growth factor signaling pathway;GO:0045766//positive regulation of angiogenesis;GO:0010646//regulation of cell communication;GO:0032879//regulation of localization;GO:0010634//positive regulation o…
271887	0.16	0	-4	5.87918e-06	2.07542e-06	Rbbp8nl	GO:0005615//extracellular space;GO:0044421//extracellular region part;GO:0005576//extracellular region;	K20773//DNA endonuclease RBBP8 [EC:3.1.-.-]+ko03440//Homologous recombination
320095	0.16	0	-4	0.000939756	0.000440746	6430550D23Rik	GO:0019538//protein metabolic process;GO:0018193//peptidyl-amino acid modification;GO:0043413//macromolecule glycosylation;GO:0006464//cellular protein modification process;GO:0006486//protein glycosylation;GO:0044238//primary metabolic process;GO:0044237//cellular metabolic process;GO:0034645//cellular macromolecule biosynthetic process;GO:1901566//organonitrogen compound biosynthetic process;GO…
329470	0.16	0	-4	2.81807e-06	9.65308e-07	Accs	GO:0009058//biosynthetic process;GO:0008152//metabolic process;GO:0030170//pyridoxal phosphate binding;GO:0036094//small molecule binding;GO:0070279//vitamin B6 binding;GO:0005515//protein binding;GO:0050662//coenzyme binding;GO:0008144//drug binding;GO:0048037//cofactor binding;GO:0019842//vitamin binding;GO:0003824//catalytic activity;GO:0005488//binding;GO:0097159//organic cyclic compound bind…
72094	0.16	0	-4	0.000457137	0.000204998	Ugt2a3	GO:0006082//organic acid metabolic process;GO:0032787//monocarboxylic acid metabolic process;GO:0005975//carbohydrate metabolic process;GO:0071704//organic substance metabolic process;GO:0043436//oxoacid metabolic process;GO:0008152//metabolic process;GO:0005996//monosaccharide metabolic process;GO:0044237//cellular metabolic process;GO:0006063//uronic acid metabolic process;GO:0019752//carboxyli…	K00699//glucuronosyltransferase [EC:2.4.1.17]+ko00980//Metabolism of xenobiotics by cytochrome P450+ko00982//Drug metabolism - cytochrome P450+ko00983//Drug metabolism - other enzymes+ko00040//Pentose and glucuronate interconversions+ko00860//Porphyrin and chlorophyll metabolism+ko00053//Ascorbate and aldarate metabolism+ko00830//Retinol metabolism+ko05204//Chemical carcinogenesis+ko00140//Steroi…
76686	0.16	0	-4	2.82067e-06	9.65308e-07	Clip3	GO:0060255//regulation of macromolecule metabolic process;GO:0044085//cellular component biogenesis;GO:0018198//peptidyl-cysteine modification;GO:0044249//cellular biosynthetic process;GO:0048522//positive regulation of cellular process;GO:0072321//chaperone-mediated protein transport;GO:0031115//negative regulation of microtubule polymerization;GO:0043170//macromolecule metabolic process;GO:1903…	K10423//CAP-Gly domain-containing linker protein 3/4
217140	1.09	0.07	-3.96083	2.07266e-13	4.1244e-14	Scrn2	GO:0006887//exocytosis;GO:0051234//establishment of localization;GO:0009987//cellular process;GO:0006810//transport;GO:0032940//secretion by cell;GO:0046903//secretion;GO:0051179//localization;GO:0016192//vesicle-mediated transport;GO:0043227//membrane-bounded organelle;GO:0043226//organelle;GO:0005615//extracellular space;GO:0005576//extracellular region;GO:0044421//extracellular region part;GO:…	K14358//secernin
105244100	0.62	0.04	-3.9542	0.00021469	9.16984e-05	Gm39774
14608	0.15	0	-3.90689	2.82275e-06	9.65308e-07	Gpr83	GO:0033993//response to lipid;GO:0010033//response to organic substance;GO:0009719//response to endogenous stimulus;GO:0014070//response to organic cyclic compound;GO:0009725//response to hormone;GO:0048545//response to steroid hormone;GO:0042221//response to chemical;GO:0051384//response to glucocorticoid;GO:0050896//response to stimulus;GO:0031960//response to corticosteroid;GO:0016021//integra…	K04210//G protein-coupled receptor 83+ko04080//Neuroactive ligand-receptor interaction
16010	0.15	0	-3.90689	0.000937613	0.000440746	Igfbp4	GO:0040008//regulation of growth;GO:1902533//positive regulation of intracellular signal transduction;GO:0006109//regulation of carbohydrate metabolic process;GO:0043567//regulation of insulin-like growth factor receptor signaling pathway;GO:0050673//epithelial cell proliferation;GO:0043410//positive regulation of MAPK cascade;GO:0006954//inflammatory response;GO:0060255//regulation of macromolec…	K10138//insulin-like growth factor-binding protein 3+ko04218//Cellular senescence+ko05202//Transcriptional misregulation in cancer+ko04115//p53 signaling pathway
208228	0.15	0	-3.90689	0.000107693	4.43474e-05	Mob3a	GO:0005622//intracellular;GO:0005623//cell;GO:0044464//cell part;GO:0046872//metal ion binding;GO:0043167//ion binding;GO:0043169//cation binding;GO:0016301//kinase activity;GO:0016740//transferase activity;GO:0003824//catalytic activity;GO:0005488//binding;GO:0016772//transferase activity, transferring phosphorus-containing groups;	K06685//MOB kinase activator 1+ko04391//Hippo signaling pathway - fly+ko04390//Hippo signaling pathway+ko04392//Hippo signaling pathway - multiple species
21405	0.15	0	-3.90689	5.21503e-05	2.06266e-05	Hnf1a	GO:0048340//paraxial mesoderm morphogenesis;GO:0036211//protein modification process;GO:0030072//peptide hormone secretion;GO:0015758//glucose transport;GO:0007178//transmembrane receptor protein serine/threonine kinase signaling pathway;GO:0030101//natural killer cell activation;GO:0051179//localization;GO:0051046//regulation of secretion;GO:0008202//steroid metabolic process;GO:0016043//cellula…	K08036//transcription factor 1, hepatocyte nuclear factor 1-alpha+ko04950//Maturity onset diabetes of the young+ko04550//Signaling pathways regulating pluripotency of stem cells
215723	0.15	0	-3.90689	0.000936607	0.000440746	Mfsd6l	GO:0031224//intrinsic component of membrane;GO:0016021//integral component of membrane;GO:0016020//membrane;GO:0044425//membrane part;
219134	0.15	0	-3.90689	1.21874e-05	4.46218e-06	Shisa2	GO:0048523//negative regulation of cellular process;GO:0048519//negative regulation of biological process;GO:0030178//negative regulation of Wnt signaling pathway;GO:0030111//regulation of Wnt signaling pathway;GO:0048585//negative regulation of response to stimulus;GO:0032501//multicellular organismal process;GO:0048583//regulation of response to stimulus;GO:0065007//biological regulation;GO:009…	K22022//mucin-21;K16819//angiomotin+ko04390//Hippo signaling pathway+ko04530//Tight junction
21960	0.15	0	-3.90689	2.0433e-11	4.63046e-12	Tnr	GO:0048869//cellular developmental process;GO:0080134//regulation of response to stress;GO:0050768//negative regulation of neurogenesis;GO:0032535//regulation of cellular component size;GO:0043062//extracellular structure organization;GO:0007611//learning or memory;GO:0048731//system development;GO:0016043//cellular component organization;GO:0010648//negative regulation of cell communication;GO:0…	K06252//tenascin+ko04512//ECM-receptor interaction+ko04510//Focal adhesion+ko05206//MicroRNAs in cancer+ko04151//PI3K-Akt signaling pathway+ko05165//Human papillomavirus infection;K06252//tenascin+ko04512//ECM-receptor interaction+ko04510//Focal adhesion+ko05206//MicroRNAs in cancer+ko04151//PI3K-Akt signaling pathway+ko05165//Human papillomavirus infection;K06252//tenascin+ko04512//ECM-receptor …
22329	0.15	0	-3.90689	5.87603e-06	2.07542e-06	Vcam1	GO:0050789//regulation of biological process;GO:0071363//cellular response to growth factor stimulus;GO:0009607//response to biotic stimulus;GO:0002682//regulation of immune system process;GO:0030155//regulation of cell adhesion;GO:0022610//biological adhesion;GO:0009628//response to abiotic stimulus;GO:0034612//response to tumor necrosis factor;GO:0050671//positive regulation of lymphocyte proli…	K06527//vascular cell adhesion molecule 1+ko04514//Cell adhesion molecules (CAMs)+ko04933//AGE-RAGE signaling pathway in diabetic complications+ko05418//Fluid shear stress and atherosclerosis+ko04668//TNF signaling pathway+ko05144//Malaria+ko05143//African trypanosomiasis+ko04670//Leukocyte transendothelial migration+ko04064//NF-kappa B signaling pathway+ko05166//HTLV-I infection
228993	0.15	0	-3.90689	0.000938746	0.000440746	Slc17a9	GO:0032940//secretion by cell;GO:0051050//positive regulation of transport;GO:0032388//positive regulation of intracellular transport;GO:0055085//transmembrane transport;GO:0033157//regulation of intracellular protein transport;GO:0050789//regulation of biological process;GO:0010822//positive regulation of mitochondrion organization;GO:1904951//positive regulation of establishment of protein loca…	K12303//MFS transporter, ACS family, solute carrier family 17 (sodium-dependent inorganic phosphate cotransporter), member 9
230824	0.15	0	-3.90689	5.21836e-05	2.06266e-05	Grhl3	GO:0006357//regulation of transcription from RNA polymerase II promoter;GO:0051960//regulation of nervous system development;GO:0048839//inner ear development;GO:2000112//regulation of cellular macromolecule biosynthetic process;GO:0016055//Wnt signaling pathway;GO:0043583//ear development;GO:0051173//positive regulation of nitrogen compound metabolic process;GO:0032502//developmental process;GO:…	K09275//transcription factor CP2 and related proteins
237175	0.15	0	-3.90689	7.06265e-08	2.1012e-08	Adgrg2	GO:0050789//regulation of biological process;GO:0009987//cellular process;GO:0007166//cell surface receptor signaling pathway;GO:0007165//signal transduction;GO:0007154//cell communication;GO:0050896//response to stimulus;GO:0065007//biological regulation;GO:0023052//signaling;GO:0051716//cellular response to stimulus;GO:0050794//regulation of cellular process;GO:0044425//membrane part;GO:0044459…	K08451//G protein-coupled receptor 64;K08451//G protein-coupled receptor 64;K08451//G protein-coupled receptor 64;K08451//G protein-coupled receptor 64;K08451//G protein-coupled receptor 64;K08451//G protein-coupled receptor 64;K08451//G protein-coupled receptor 64;K08451//G protein-coupled receptor 64;K08451//G protein-coupled receptor 64;K08451//G protein-coupled receptor 64;K08451//G protein-c…
329727	0.15	0	-3.90689	3.10477e-07	9.71282e-08	Dennd2c	GO:0005488//binding;GO:0019899//enzyme binding;GO:0051020//GTPase binding;GO:0031267//small GTPase binding;GO:0098772//molecular function regulator;GO:0005088//Ras guanyl-nucleotide exchange factor activity;GO:0017137//Rab GTPase binding;GO:0017112//Rab guanyl-nucleotide exchange factor activity;GO:0005515//protein binding;GO:0017016//Ras GTPase binding;GO:0005085//guanyl-nucleotide exchange fact…	K20161//DENN domain-containing protein 2
330671	0.15	0	-3.90689	1.21916e-05	4.46218e-06	B4galnt4	GO:0043229//intracellular organelle;GO:0044444//cytoplasmic part;GO:0044425//membrane part;GO:0005795//Golgi stack;GO:0098791//Golgi subcompartment;GO:0016020//membrane;GO:0012505//endomembrane system;GO:0031224//intrinsic component of membrane;GO:0044464//cell part;GO:0043231//intracellular membrane-bounded organelle;GO:0043227//membrane-bounded organelle;GO:0044431//Golgi apparatus part;GO:0016…	K09657//beta-1,4-N-acetylgalactosaminyltransferase 4 [EC:2.4.1.244]+ko01100//Metabolic pathways
382639	0.15	0	-3.90689	1.21748e-05	4.46218e-06	Zbtb42	GO:0019219//regulation of nucleobase-containing compound metabolic process;GO:0007517//muscle organ development;GO:0048731//system development;GO:0050794//regulation of cellular process;GO:0044237//cellular metabolic process;GO:0043170//macromolecule metabolic process;GO:0032774//RNA biosynthetic process;GO:0018130//heterocycle biosynthetic process;GO:0010558//negative regulation of macromolecule…	K09228//KRAB domain-containing zinc finger protein;K09228//KRAB domain-containing zinc finger protein
408059	0.15	0	-3.90689	0.000457201	0.000204998	BC049352	GO:0016021//integral component of membrane;GO:0044425//membrane part;GO:0031224//intrinsic component of membrane;GO:0016020//membrane;
56017	0.15	0	-3.90689	0.00093862	0.000440746	Slc2a8	GO:0051321//meiotic cell cycle;GO:1903046//meiotic cell cycle process;GO:0071310//cellular response to organic substance;GO:0006950//response to stress;GO:0070887//cellular response to chemical stimulus;GO:0000280//nuclear division;GO:0065007//biological regulation;GO:0009719//response to endogenous stimulus;GO:0050896//response to stimulus;GO:0005996//monosaccharide metabolic process;GO:0006810/…	K08145//MFS transporter, SP family, solute carrier family 2 (facilitated glucose transporter), member 8
625530	0.15	0	-3.90689	0.00093799	0.000440746	Usp17le	GO:0016579//protein deubiquitination;GO:0044265//cellular macromolecule catabolic process;GO:0044237//cellular metabolic process;GO:0071704//organic substance metabolic process;GO:0019538//protein metabolic process;GO:0008152//metabolic process;GO:0009056//catabolic process;GO:0006464//cellular protein modification process;GO:0044238//primary metabolic process;GO:0009057//macromolecule catabolic …	K11845//ubiquitin carboxyl-terminal hydrolase 17 [EC:3.4.19.12]
80290	0.15	0.01	-3.90689	4.18732e-05	1.63558e-05	Gpr146	GO:0016021//integral component of membrane;GO:0044464//cell part;GO:0005623//cell;GO:0044425//membrane part;GO:0016020//membrane;GO:0005886//plasma membrane;GO:0071944//cell periphery;GO:0031224//intrinsic component of membrane;GO:0060089//molecular transducer activity;GO:0004930//G-protein coupled receptor activity;GO:0004872//receptor activity;GO:0004871//signal transducer activity;GO:0099600//…	K08431//G protein-coupled receptor 146
68337	1.34	0.09	-3.89616	3.08575e-12	6.63666e-13	Crip2	GO:0050794//regulation of cellular process;GO:0048518//positive regulation of biological process;GO:0002376//immune system process;GO:0050789//regulation of biological process;GO:0032501//multicellular organismal process;GO:0065007//biological regulation;GO:0030097//hemopoiesis;GO:0048522//positive regulation of cellular process;GO:0048856//anatomical structure development;GO:0008284//positive re…	K09377//cysteine and glycine-rich protein
19225	0.29	0.02	-3.85798	1.69577e-10	4.1092e-11	Ptgs2	GO:0007275//multicellular organism development;GO:0072358//cardiovascular system development;GO:0001944//vasculature development;GO:0048856//anatomical structure development;GO:0001568//blood vessel development;GO:0048514//blood vessel morphogenesis;GO:0001525//angiogenesis;GO:0048646//anatomical structure formation involved in morphogenesis;GO:0045444//fat cell differentiation;GO:0048869//cellul…	K11987//prostaglandin-endoperoxide synthase 2 [EC:1.14.99.1]+ko05222//Small cell lung cancer+ko04913//Ovarian steroidogenesis+ko04657//IL-17 signaling pathway+ko04726//Serotonergic synapse+ko04723//Retrograde endocannabinoid signaling+ko00590//Arachidonic acid metabolism+ko04625//C-type lectin receptor signaling pathway+ko04668//TNF signaling pathway+ko05140//Leishmaniasis+ko05200//Pathways in ca…
226565	2.54	0.18	-3.81876	1.69049e-37	1.29119e-38	Fmo6	GO:0008152//metabolic process;GO:0055114//oxidation-reduction process;GO:0031224//intrinsic component of membrane;GO:0044425//membrane part;GO:0016021//integral component of membrane;GO:0016020//membrane;GO:0043167//ion binding;GO:0050662//coenzyme binding;GO:0000166//nucleotide binding;GO:0043168//anion binding;GO:0097159//organic cyclic compound binding;GO:0050660//flavin adenine dinucleotide b…	K00485//dimethylaniline monooxygenase (N-oxide forming) [EC:1.14.13.8]+ko00982//Drug metabolism - cytochrome P450;K00485//dimethylaniline monooxygenase (N-oxide forming) [EC:1.14.13.8]+ko00982//Drug metabolism - cytochrome P450
12738	0.14	0	-3.80735	0.000222444	9.5347e-05	Cldn2	GO:0098742//cell-cell adhesion via plasma-membrane adhesion molecules;GO:0022610//biological adhesion;GO:0098609//cell-cell adhesion;GO:0007155//cell adhesion;GO:0016338//calcium-independent cell-cell adhesion via plasma membrane cell-adhesion molecules;GO:0044421//extracellular region part;GO:0043227//membrane-bounded organelle;GO:0005615//extracellular space;GO:0044464//cell part;GO:0031224//in…	K06087//claudin+ko04514//Cell adhesion molecules (CAMs)+ko04530//Tight junction+ko04670//Leukocyte transendothelial migration+ko05160//Hepatitis C
15203	0.14	0	-3.80735	1.35747e-06	4.4898e-07	Heph	GO:0055072//iron ion homeostasis;GO:0055076//transition metal ion homeostasis;GO:0006812//cation transport;GO:0055080//cation homeostasis;GO:0065008//regulation of biological quality;GO:0042592//homeostatic process;GO:0006875//cellular metal ion homeostasis;GO:0000041//transition metal ion transport;GO:0006810//transport;GO:0030003//cellular cation homeostasis;GO:0055065//metal ion homeostasis;GO…	K14735//hephaestin [EC:1.16.3.1]+ko00860//Porphyrin and chlorophyll metabolism+ko04978//Mineral absorption;K14735//hephaestin [EC:1.16.3.1]+ko00860//Porphyrin and chlorophyll metabolism+ko04978//Mineral absorption;K14735//hephaestin [EC:1.16.3.1]+ko00860//Porphyrin and chlorophyll metabolism+ko04978//Mineral absorption
15531	0.14	0.01	-3.80735	3.13568e-07	9.83918e-08	Ndst1	GO:0030201//heparan sulfate proteoglycan metabolic process;GO:0007507//heart development;GO:0048568//embryonic organ development;GO:0000271//polysaccharide biosynthetic process;GO:0010562//positive regulation of phosphorus metabolic process;GO:0030901//midbrain development;GO:0016051//carbohydrate biosynthetic process;GO:1901137//carbohydrate derivative biosynthetic process;GO:0005975//carbohydra…	K02576//heparan sulfate N-deacetylase/N-sulfotransferase NDST1 [EC:3.1.1.- 2.8.2.-]+ko00534//Glycosaminoglycan biosynthesis - heparan sulfate / heparin+ko01100//Metabolic pathways;K02576//heparan sulfate N-deacetylase/N-sulfotransferase NDST1 [EC:3.1.1.- 2.8.2.-]+ko00534//Glycosaminoglycan biosynthesis - heparan sulfate / heparin+ko01100//Metabolic pathways;K02576//heparan sulfate N-deacetylase/N…
209212	0.7	0.05	-3.80735	8.60424e-16	1.5092e-16	Osgin2	GO:0045926//negative regulation of growth;GO:0050794//regulation of cellular process;GO:0001558//regulation of cell growth;GO:0065007//biological regulation;GO:0040008//regulation of growth;GO:0051128//regulation of cellular component organization;GO:0030308//negative regulation of cell growth;GO:0050789//regulation of biological process;GO:0048523//negative regulation of cellular process;GO:0048…	K13171//serine/arginine repetitive matrix protein 1+ko03013//RNA transport+ko03015//mRNA surveillance pathway;K13171//serine/arginine repetitive matrix protein 1+ko03013//RNA transport+ko03015//mRNA surveillance pathway;K13171//serine/arginine repetitive matrix protein 1+ko03013//RNA transport+ko03015//mRNA surveillance pathway
228432	0.14	0	-3.80735	1.75455e-09	4.57366e-10	Ano3	GO:0007009//plasma membrane organization;GO:0016048//detection of temperature stimulus;GO:0009605//response to external stimulus;GO:0009266//response to temperature stimulus;GO:0017121//phospholipid scrambling;GO:0010256//endomembrane system organization;GO:0009582//detection of abiotic stimulus;GO:0071840//cellular component organization or biogenesis;GO:0065007//biological regulation;GO:0061024…	K19498//anoctamin-3
27412	0.14	0	-3.80735	0.000222411	9.5347e-05	Peg12	GO:0007275//multicellular organism development;GO:0000578//embryonic axis specification;GO:0032501//multicellular organismal process;GO:0048856//anatomical structure development;GO:0009798//axis specification;GO:0007389//pattern specification process;GO:0032502//developmental process;GO:0009880//embryonic pattern specification;GO:0009790//embryo development;	K03069//frequently rearranged in advanced T-cell lymphomas 1+ko05226//Gastric cancer+ko05225//Hepatocellular carcinoma+ko04310//Wnt signaling pathway+ko05200//Pathways in cancer+ko05224//Breast cancer
329278	0.14	0	-3.80735	3.66155e-09	9.83342e-10	Tnn	GO:0048667//cell morphogenesis involved in neuron differentiation;GO:0007409//axonogenesis;GO:0048468//cell development;GO:0009968//negative regulation of signal transduction;GO:0022008//neurogenesis;GO:0048585//negative regulation of response to stimulus;GO:0120039//plasma membrane bounded cell projection morphogenesis;GO:0009966//regulation of signal transduction;GO:0051674//localization of cel…	K06252//tenascin+ko04512//ECM-receptor interaction+ko04510//Focal adhesion+ko05206//MicroRNAs in cancer+ko04151//PI3K-Akt signaling pathway+ko05165//Human papillomavirus infection
57916	0.14	0	-3.80735	0.000222378	9.5347e-05	Tnfrsf13b	GO:0042592//homeostatic process;GO:0050670//regulation of lymphocyte proliferation;GO:0065007//biological regulation;GO:0002250//adaptive immune response;GO:0030889//negative regulation of B cell proliferation;GO:0065008//regulation of biological quality;GO:0009987//cellular process;GO:0048872//homeostasis of number of cells;GO:0002520//immune system development;GO:0007166//cell surface receptor …	K05150//tumor necrosis factor receptor superfamily member 13B+ko04672//Intestinal immune network for IgA production+ko05340//Primary immunodeficiency+ko04060//Cytokine-cytokine receptor interaction
98733	0.14	0.01	-3.80735	0.000283957	0.000123594	Obsl1	GO:0033365//protein localization to organelle;GO:0070271//protein complex biogenesis;GO:0048856//anatomical structure development;GO:0000226//microtubule cytoskeleton organization;GO:0007010//cytoskeleton organization;GO:0006936//muscle contraction;GO:0008104//protein localization;GO:0048522//positive regulation of cellular process;GO:0070925//organelle assembly;GO:0034067//protein localization t…	K19574//obscurin-like protein 1
207495	0.55	0.04	-3.78136	2.24717e-08	6.43182e-09	Baiap2l2	GO:0044087//regulation of cellular component biogenesis;GO:0032868//response to insulin;GO:0010638//positive regulation of organelle organization;GO:0010243//response to organonitrogen compound;GO:1901699//cellular response to nitrogen compound;GO:0030036//actin cytoskeleton organization;GO:0051493//regulation of cytoskeleton organization;GO:0061572//actin filament bundle organization;GO:0050794/…	K20127//BAI1-associated protein 2-like protein
11501	0.95	0.07	-3.7625	2.31832e-23	2.88638e-24	Adam8	GO:0009605//response to external stimulus;GO:0001819//positive regulation of cytokine production;GO:0002764//immune response-regulating signaling pathway;GO:0048513//animal organ development;GO:0002523//leukocyte migration involved in inflammatory response;GO:0051896//regulation of protein kinase B signaling;GO:0002521//leukocyte differentiation;GO:0030154//cell differentiation;GO:0071456//cellul…	K06540//disintegrin and metalloproteinase domain-containing protein 8 [EC:3.4.24.-];K06540//disintegrin and metalloproteinase domain-containing protein 8 [EC:3.4.24.-];K06540//disintegrin and metalloproteinase domain-containing protein 8 [EC:3.4.24.-];K06540//disintegrin and metalloproteinase domain-containing protein 8 [EC:3.4.24.-]
102278	0.94	0.07	-3.74723	6.08403e-15	1.11358e-15	Cpne7	GO:0051592//response to calcium ion;GO:0071277//cellular response to calcium ion;GO:0070887//cellular response to chemical stimulus;GO:0010038//response to metal ion;GO:0010035//response to inorganic substance;GO:0071241//cellular response to inorganic substance;GO:0042221//response to chemical;GO:0009987//cellular process;GO:0071248//cellular response to metal ion;GO:0050896//response to stimulu…	K20493//leucine-rich repeat-containing protein 16;K16280//E3 ubiquitin-protein ligase RGLG [EC:2.3.2.27];K11348//bromodomain and PHD finger-containing protein 1
102632152	1.07	0.08	-3.74147	6.71205e-31	6.33316e-32	Gm30302	GO:0044425//membrane part;GO:0016021//integral component of membrane;GO:0016020//membrane;GO:0031224//intrinsic component of membrane;
11419	0.13	0	-3.70044	1.21769e-05	4.46218e-06	Asic1	GO:0032879//regulation of localization;GO:0050896//response to stimulus;GO:0099177//regulation of trans-synaptic signaling;GO:0050915//sensory perception of sour taste;GO:0071467//cellular response to pH;GO:0032501//multicellular organismal process;GO:0008306//associative learning;GO:0051260//protein homooligomerization;GO:0035725//sodium ion transmembrane transport;GO:0104004//cellular response …	K04829//acid-sensing ion channel 1+ko04750//Inflammatory mediator regulation of TRP channels;K04829//acid-sensing ion channel 1+ko04750//Inflammatory mediator regulation of TRP channels;K04829//acid-sensing ion channel 1+ko04750//Inflammatory mediator regulation of TRP channels
11444	0.13	0	-3.70044	3.36775e-08	9.77294e-09	Chrnb2	GO:1905144//response to acetylcholine;GO:0043279//response to alkaloid;GO:0045321//leukocyte activation;GO:0010647//positive regulation of cell communication;GO:0080090//regulation of primary metabolic process;GO:0051954//positive regulation of amine transport;GO:0060073//micturition;GO:2000026//regulation of multicellular organismal development;GO:0060359//response to ammonium ion;GO:0007268//ch…	K04813//nicotinic acetylcholine receptor beta-2+ko04725//Cholinergic synapse+ko05033//Nicotine addiction+ko04080//Neuroactive ligand-receptor interaction
11932	0.26	0.02	-3.70044	8.04574e-07	2.6129e-07	Atp1b2	GO:0071804//cellular potassium ion transport;GO:0051234//establishment of localization;GO:0055078//sodium ion homeostasis;GO:0002028//regulation of sodium ion transport;GO:0065009//regulation of molecular function;GO:0050789//regulation of biological process;GO:0019725//cellular homeostasis;GO:1901016//regulation of potassium ion transmembrane transporter activity;GO:0030004//cellular monovalent …	K01540//sodium/potassium-transporting ATPase subunit beta+ko04024//cAMP signaling pathway+ko04022//cGMP-PKG signaling pathway+ko04919//Thyroid hormone signaling pathway+ko04918//Thyroid hormone synthesis+ko04911//Insulin secretion+ko04261//Adrenergic signaling in cardiomyocytes+ko04260//Cardiac muscle contraction+ko04978//Mineral absorption+ko04974//Protein digestion and absorption+ko04976//Bile …
12700	0.13	0	-3.70044	0.000107759	4.43474e-05	Cish	GO:1902532//negative regulation of intracellular signal transduction;GO:1904892//regulation of STAT cascade;GO:0033673//negative regulation of kinase activity;GO:1904893//negative regulation of STAT cascade;GO:0008152//metabolic process;GO:0042326//negative regulation of phosphorylation;GO:0043086//negative regulation of catalytic activity;GO:0023052//signaling;GO:0071310//cellular response to or…	K04701//cytokine inducible SH2-containing protein+ko04630//Jak-STAT signaling pathway+ko04917//Prolactin signaling pathway
12772	0.13	0	-3.70044	1.21706e-05	4.46218e-06	Ccr2	GO:0050921//positive regulation of chemotaxis;GO:0001934//positive regulation of protein phosphorylation;GO:0034097//response to cytokine;GO:0019222//regulation of metabolic process;GO:0043309//regulation of eosinophil degranulation;GO:0070887//cellular response to chemical stimulus;GO:0036296//response to increased oxygen levels;GO:0007600//sensory perception;GO:0050865//regulation of cell activ…	K04177//C-C chemokine receptor type 2+ko04062//Chemokine signaling pathway+ko04060//Cytokine-cytokine receptor interaction;K04177//C-C chemokine receptor type 2+ko04062//Chemokine signaling pathway+ko04060//Cytokine-cytokine receptor interaction;K04177//C-C chemokine receptor type 2+ko04062//Chemokine signaling pathway+ko04060//Cytokine-cytokine receptor interaction
13643	0.13	0	-3.70044	5.23507e-05	2.06266e-05	Efnb3	GO:0030154//cell differentiation;GO:0010769//regulation of cell morphogenesis involved in differentiation;GO:0007167//enzyme linked receptor protein signaling pathway;GO:0045665//negative regulation of neuron differentiation;GO:0051129//negative regulation of cellular component organization;GO:0051241//negative regulation of multicellular organismal process;GO:0051716//cellular response to stimul…	K05463//ephrin-B+ko04360//Axon guidance
319710	0.13	0.01	-3.70044	2.18953e-05	8.27062e-06	Frmd6	GO:0070252//actin-mediated cell contraction;GO:0032989//cellular component morphogenesis;GO:0071840//cellular component organization or biogenesis;GO:0009888//tissue development;GO:0030036//actin cytoskeleton organization;GO:0051179//localization;GO:0065007//biological regulation;GO:0048856//anatomical structure development;GO:0009987//cellular process;GO:0032502//developmental process;GO:0009653…	K16822//FERM domain-containing protein 6+ko04390//Hippo signaling pathway+ko04392//Hippo signaling pathway - multiple species
320722	0.13	0	-3.70044	0.000938242	0.000440746	Akain1	GO:0050794//regulation of cellular process;GO:0048523//negative regulation of cellular process;GO:0010738//regulation of protein kinase A signaling;GO:1902531//regulation of intracellular signal transduction;GO:0033036//macromolecule localization;GO:0043254//regulation of protein complex assembly;GO:0050789//regulation of biological process;GO:0051129//negative regulation of cellular component or…
545893	0.65	0.05	-3.70044	5.92714e-06	2.09422e-06	Mansc4	GO:0044425//membrane part;GO:0031224//intrinsic component of membrane;GO:0016021//integral component of membrane;GO:0016020//membrane;
56857	0.13	0	-3.70044	1.35773e-06	4.4898e-07	Slc37a2	GO:0015980//energy derivation by oxidation of organic compounds;GO:0019362//pyridine nucleotide metabolic process;GO:0015711//organic anion transport;GO:0006793//phosphorus metabolic process;GO:0098656//anion transmembrane transport;GO:0006139//nucleobase-containing compound metabolic process;GO:0015760//glucose-6-phosphate transport;GO:0044238//primary metabolic process;GO:0006807//nitrogen comp…	K13783//MFS transporter, OPA family, solute carrier family 37 (glycerol-3-phosphate transporter), member 1/2
63873	0.13	0	-3.70044	5.23675e-05	2.06266e-05	Trpv4	GO:0016043//cellular component organization;GO:0071840//cellular component organization or biogenesis;GO:0006816//calcium ion transport;GO:0006996//organelle organization;GO:0070838//divalent metal ion transport;GO:0022408//negative regulation of cell-cell adhesion;GO:0072511//divalent inorganic cation transport;GO:0031532//actin cytoskeleton reorganization;GO:0030029//actin filament-based proces…	K04973//transient receptor potential cation channel subfamily V member 4+ko04218//Cellular senescence+ko05418//Fluid shear stress and atherosclerosis+ko04750//Inflammatory mediator regulation of TRP channels
74551	0.13	0	-3.70044	5.2267e-05	2.06266e-05	Pck2	GO:1903532//positive regulation of secretion by cell;GO:0032024//positive regulation of insulin secretion;GO:0071704//organic substance metabolic process;GO:0044237//cellular metabolic process;GO:0005996//monosaccharide metabolic process;GO:0090277//positive regulation of peptide hormone secretion;GO:0009725//response to hormone;GO:0051384//response to glucocorticoid;GO:0065008//regulation of bio…	K01596//phosphoenolpyruvate carboxykinase (GTP) [EC:4.1.1.32]+ko03320//PPAR signaling pathway+ko04910//Insulin signaling pathway+ko00010//Glycolysis / Gluconeogenesis+ko00020//Citrate cycle (TCA cycle)+ko04931//Insulin resistance+ko00620//Pyruvate metabolism+ko04152//AMPK signaling pathway+ko04151//PI3K-Akt signaling pathway+ko04964//Proximal tubule bicarbonate reclamation+ko01100//Metabolic path…
94284	0.13	0	-3.70044	5.21919e-05	2.06266e-05	Ugt1a6a	GO:0006063//uronic acid metabolic process;GO:0044237//cellular metabolic process;GO:0006082//organic acid metabolic process;GO:0032787//monocarboxylic acid metabolic process;GO:0071704//organic substance metabolic process;GO:0005996//monosaccharide metabolic process;GO:0051716//cellular response to stimulus;GO:0043436//oxoacid metabolic process;GO:0009410//response to xenobiotic stimulus;GO:00526…	K00699//glucuronosyltransferase [EC:2.4.1.17]+ko00980//Metabolism of xenobiotics by cytochrome P450+ko00982//Drug metabolism - cytochrome P450+ko00983//Drug metabolism - other enzymes+ko00040//Pentose and glucuronate interconversions+ko00860//Porphyrin and chlorophyll metabolism+ko00053//Ascorbate and aldarate metabolism+ko00830//Retinol metabolism+ko05204//Chemical carcinogenesis+ko00140//Steroi…
279766	0.25	0.02	-3.64386	0.000809497	0.000376438	Rhbdd3	GO:0006807//nitrogen compound metabolic process;GO:0036211//protein modification process;GO:0042221//response to chemical;GO:0019538//protein metabolic process;GO:0031347//regulation of defense response;GO:0048731//system development;GO:0006793//phosphorus metabolic process;GO:0009410//response to xenobiotic stimulus;GO:0001889//liver development;GO:0006468//protein phosphorylation;GO:0090087//re…	K09652//rhomboid domain-containing protein 2;K09652//rhomboid domain-containing protein 2;K09652//rhomboid domain-containing protein 2;K09652//rhomboid domain-containing protein 2;K09652//rhomboid domain-containing protein 2
71913	0.5	0.04	-3.64386	2.24667e-08	6.43182e-09	Tmem79	GO:0009913//epidermal cell differentiation;GO:0070268//cornification;GO:0002070//epithelial cell maturation;GO:0006887//exocytosis;GO:0022405//hair cycle process;GO:0098773//skin epidermis development;GO:0045684//positive regulation of epidermis development;GO:0045055//regulated exocytosis;GO:0022404//molting cycle process;GO:0043588//skin development;GO:0065008//regulation of biological quality;…
16835	0.12	0	-3.58496	1.35669e-06	4.4898e-07	Ldlr	GO:0045596//negative regulation of cell differentiation;GO:0065008//regulation of biological quality;GO:0048584//positive regulation of response to stimulus;GO:0097242//amyloid-beta clearance;GO:0044255//cellular lipid metabolic process;GO:0050896//response to stimulus;GO:0010984//regulation of lipoprotein particle clearance;GO:0007586//digestion;GO:0001523//retinoid metabolic process;GO:0001101/…	K12473//low-density lipoprotein receptor+ko04144//Endocytosis+ko04913//Ovarian steroidogenesis+ko05145//Toxoplasmosis+ko04979//Cholesterol metabolism+ko04976//Bile secretion+ko04934//Cushing's syndrome+ko04927//Cortisol synthesis and secretion+ko04925//Aldosterone synthesis and secretion+ko05160//Hepatitis C
17523	0.12	0	-3.58496	0.000940895	0.000440746	Mpo	GO:0051187//cofactor catabolic process;GO:0040008//regulation of growth;GO:0016043//cellular component organization;GO:0032501//multicellular organismal process;GO:0042742//defense response to bacterium;GO:0051186//cofactor metabolic process;GO:0034374//low-density lipoprotein particle remodeling;GO:0009617//response to bacterium;GO:0071704//organic substance metabolic process;GO:0071825//protein…	K10789//myeloperoxidase [EC:1.11.2.2]+ko04145//Phagosome+ko00983//Drug metabolism - other enzymes+ko05202//Transcriptional misregulation in cancer+ko05221//Acute myeloid leukemia
216227	0.12	0.01	-3.58496	2.81507e-05	1.07756e-05	Slc17a8	GO:0006865//amino acid transport;GO:0050896//response to stimulus;GO:0006810//transport;GO:0015813//L-glutamate transport;GO:0060322//head development;GO:0048513//animal organ development;GO:0043010//camera-type eye development;GO:0042221//response to chemical;GO:0043583//ear development;GO:0003008//system process;GO:0042493//response to drug;GO:0048839//inner ear development;GO:0050877//nervous …	K12302//MFS transporter, ACS family, solute carrier family 17 (sodium-dependent inorganic phosphate cotransporter), member 6/7/8+ko04724//Glutamatergic synapse+ko04721//Synaptic vesicle cycle+ko04723//Retrograde endocannabinoid signaling+ko05033//Nicotine addiction
230909	0.12	0	-3.58496	0.000939251	0.000440746	Gm572	GO:0048731//system development;GO:0007275//multicellular organism development;GO:0007368//determination of left/right symmetry;GO:0072359//circulatory system development;GO:0007507//heart development;GO:0032501//multicellular organismal process;GO:0009855//determination of bilateral symmetry;GO:0009799//specification of symmetry;GO:0032502//developmental process;GO:0007389//pattern specification …	K10380//ankyrin+ko04624//Toll and Imd signaling pathway+ko05205//Proteoglycans in cancer
234878	0.12	0	-3.58496	2.81548e-06	9.65308e-07	BC021891	GO:0016310//phosphorylation;GO:0036211//protein modification process;GO:0010646//regulation of cell communication;GO:0051347//positive regulation of transferase activity;GO:0007254//JNK cascade;GO:0080090//regulation of primary metabolic process;GO:0032872//regulation of stress-activated MAPK cascade;GO:0032270//positive regulation of cellular protein metabolic process;GO:0043408//regulation of M…	K17534//mitogen-activated protein kinase kinase kinase MLK4 [EC:2.7.11.25]
327766	0.24	0.02	-3.58496	1.04879e-10	2.50108e-11	Tmem26	GO:0016021//integral component of membrane;GO:0016020//membrane;GO:0044425//membrane part;GO:0031224//intrinsic component of membrane;
353190	0.12	0	-3.58496	5.22754e-05	2.06266e-05	Edc3	GO:0044260//cellular macromolecule metabolic process;GO:1901360//organic cyclic compound metabolic process;GO:0006807//nitrogen compound metabolic process;GO:0060255//regulation of macromolecule metabolic process;GO:0009057//macromolecule catabolic process;GO:0022618//ribonucleoprotein complex assembly;GO:0019439//aromatic compound catabolic process;GO:0033962//cytoplasmic mRNA processing body as…	K12615//enhancer of mRNA-decapping protein 3+ko03018//RNA degradation
54396	0.12	0	-3.58496	5.23339e-05	2.06266e-05	Irgm2	GO:0033993//response to lipid;GO:0075071//autophagy involved in symbiotic interaction;GO:0019932//second-messenger-mediated signaling;GO:0098542//defense response to other organism;GO:0006955//immune response;GO:0009967//positive regulation of signal transduction;GO:0016241//regulation of macroautophagy;GO:0019220//regulation of phosphate metabolic process;GO:0002253//activation of immune respons…	K14139//immunity-related GTPase family M protein [EC:3.6.5.-]+ko05145//Toxoplasmosis;K14140//interferon gamma induced GTPase+ko05145//Toxoplasmosis
56876	0.12	0	-3.58496	0.00022228	9.5347e-05	Nsmf	GO:0009987//cellular process;GO:0065008//regulation of biological quality;GO:0010243//response to organonitrogen compound;GO:0032879//regulation of localization;GO:0023051//regulation of signaling;GO:0010720//positive regulation of cell development;GO:0031325//positive regulation of cellular metabolic process;GO:0010604//positive regulation of macromolecule metabolic process;GO:0071371//cellular …	K07359//calcium/calmodulin-dependent protein kinase kinase 2 [EC:2.7.11.17]+ko04140//Autophagy - animal+ko04211//Longevity regulating pathway+ko05034//Alcoholism+ko04152//AMPK signaling pathway+ko04920//Adipocytokine signaling pathway+ko04921//Oxytocin signaling pathway
BGI_novel_G000275	0.95	0.08	-3.56986	8.04262e-07	2.6129e-07	BGI_novel_G000275	GO:0043170//macromolecule metabolic process;GO:0050896//response to stimulus;GO:0006810//transport;GO:0009411//response to UV;GO:0051234//establishment of localization;GO:0034645//cellular macromolecule biosynthetic process;GO:0034613//cellular protein localization;GO:0009058//biosynthetic process;GO:0009416//response to light stimulus;GO:1901576//organic substance biosynthetic process;GO:0008152…
63954	1.18	0.1	-3.56071	5.9282e-06	2.09422e-06	Rbp7	GO:0044424//intracellular part;GO:0005622//intracellular;GO:0044464//cell part;GO:0005623//cell;GO:0005737//cytoplasm;GO:0019841//retinol binding;GO:0036094//small molecule binding;GO:0005488//binding;GO:0008289//lipid binding;GO:0005215//transporter activity;GO:0016918//retinal binding;GO:0019842//vitamin binding;GO:0005501//retinoid binding;GO:0019840//isoprenoid binding;GO:0043178//alcohol bin…	K06210//nicotinamide mononucleotide adenylyltransferase [EC:2.7.7.1 2.7.7.18]+ko00760//Nicotinate and nicotinamide metabolism+ko01100//Metabolic pathways;K14622//retinol binding protein 2+ko04977//Vitamin digestion and absorption
BGI_novel_G000021	0.93	0.08	-3.53916	0.000809607	0.000376438	BGI_novel_G000021	GO:0010467//gene expression;GO:0006725//cellular aromatic compound metabolic process;GO:0051321//meiotic cell cycle;GO:0000280//nuclear division;GO:0007059//chromosome segregation;GO:0045132//meiotic chromosome segregation;GO:0071704//organic substance metabolic process;GO:0007283//spermatogenesis;GO:0048285//organelle fission;GO:0044703//multi-organism reproductive process;GO:0044260//cellular m…
74343	0.23	0.02	-3.52356	7.95277e-05	3.22274e-05	Crtc2	GO:0061647//histone H3-K9 modification;GO:0006464//cellular protein modification process;GO:0009891//positive regulation of biosynthetic process;GO:0019222//regulation of metabolic process;GO:0051234//establishment of localization;GO:0044260//cellular macromolecule metabolic process;GO:0031323//regulation of cellular metabolic process;GO:0043543//protein acylation;GO:0006475//internal protein ami…	K16333//CREB-regulated transcription coactivator 2+ko04931//Insulin resistance+ko04152//AMPK signaling pathway+ko04151//PI3K-Akt signaling pathway+ko04922//Glucagon signaling pathway+ko05166//HTLV-I infection
18146	0.45	0.04	-3.49185	1.14219e-05	4.16822e-06	Npdc1	GO:0016021//integral component of membrane;GO:0016020//membrane;GO:0044425//membrane part;GO:0031224//intrinsic component of membrane;	K01509//adenosinetriphosphatase [EC:3.6.1.3]+ko00230//Purine metabolism+ko04742//Taste transduction;K09367//POU domain transcription factor, class 5+ko04550//Signaling pathways regulating pluripotency of stem cells;K14676//lysophospholipid hydrolase [EC:3.1.1.5]+ko00564//Glycerophospholipid metabolism;K09367//POU domain transcription factor, class 5+ko04550//Signaling pathways regulating pluripot…
BGI_novel_G000581	0.45	0.04	-3.49185	0.000214721	9.16984e-05	BGI_novel_G000581	GO:0048007//antigen processing and presentation, exogenous lipid antigen via MHC class Ib;GO:0048003//antigen processing and presentation of lipid antigen via MHC class Ib;GO:0006950//response to stress;GO:0045087//innate immune response;GO:0019884//antigen processing and presentation of exogenous antigen;GO:0050896//response to stimulus;GO:0019882//antigen processing and presentation;GO:0006955/…	K06448//T-cell surface glycoprotein CD1+ko04640//Hematopoietic cell lineage+ko04530//Tight junction
22776	0.67	0.06	-3.48113	4.12609e-21	5.61076e-22	Zim1	GO:0050794//regulation of cellular process;GO:0019222//regulation of metabolic process;GO:0065007//biological regulation;GO:0051171//regulation of nitrogen compound metabolic process;GO:0009889//regulation of biosynthetic process;GO:0019219//regulation of nucleobase-containing compound metabolic process;GO:2001141//regulation of RNA biosynthetic process;GO:0051252//regulation of RNA metabolic pro…	K09228//KRAB domain-containing zinc finger protein
101055676	0.11	0	-3.45943	0.000107809	4.43474e-05	LOC101055676
108958	0.11	0	-3.45943	0.000107958	4.43474e-05	Fam73b	GO:0008053//mitochondrial fusion;GO:0061024//membrane organization;GO:0032502//developmental process;GO:0016043//cellular component organization;GO:0001501//skeletal system development;GO:0032501//multicellular organismal process;GO:0071840//cellular component organization or biogenesis;GO:0048284//organelle fusion;GO:0048513//animal organ development;GO:0007005//mitochondrion organization;GO:000…
14632	0.11	0	-3.45943	5.22921e-05	2.06266e-05	Gli1	GO:0021549//cerebellum development;GO:0044703//multi-organism reproductive process;GO:0031325//positive regulation of cellular metabolic process;GO:0048562//embryonic organ morphogenesis;GO:0003006//developmental process involved in reproduction;GO:0000003//reproduction;GO:0031100//animal organ regeneration;GO:0007418//ventral midline development;GO:0030855//epithelial cell differentiation;GO:000…	K16797//zinc finger protein GLI1+ko04024//cAMP signaling pathway+ko05217//Basal cell carcinoma+ko04340//Hedgehog signaling pathway+ko05200//Pathways in cancer
16498	0.11	0	-3.45943	0.000107743	4.43474e-05	Kcnab2	GO:0034765//regulation of ion transmembrane transport;GO:0010959//regulation of metal ion transport;GO:0006739//NADP metabolic process;GO:0046496//nicotinamide nucleotide metabolic process;GO:0002520//immune system development;GO:0007275//multicellular organism development;GO:0006732//coenzyme metabolic process;GO:0006461//protein complex assembly;GO:0065007//biological regulation;GO:0006793//pho…	K04883//potassium voltage-gated channel Shaker-related subfamily A, beta member 2
18216	0.11	0	-3.45943	2.52211e-05	9.59372e-06	Ntsr1	GO:0045913//positive regulation of carbohydrate metabolic process;GO:0009056//catabolic process;GO:0051930//regulation of sensory perception of pain;GO:0050794//regulation of cellular process;GO:0043066//negative regulation of apoptotic process;GO:0050789//regulation of biological process;GO:0009581//detection of external stimulus;GO:2001259//positive regulation of cation channel activity;GO:0003…	K04211//neurotensin receptor 1+ko04020//Calcium signaling pathway+ko04080//Neuroactive ligand-receptor interaction
23844	0.11	0	-3.45943	0.000940642	0.000440746	Clca1	GO:0070482//response to oxygen levels;GO:0051179//localization;GO:0030001//metal ion transport;GO:0071453//cellular response to oxygen levels;GO:0006820//anion transport;GO:0036293//response to decreased oxygen levels;GO:0055085//transmembrane transport;GO:0036294//cellular response to decreased oxygen levels;GO:0098656//anion transmembrane transport;GO:0070838//divalent metal ion transport;GO:00…	K05027//calcium-activated chloride channel regulator 1+ko04972//Pancreatic secretion+ko04924//Renin secretion
242443	0.11	0	-3.45943	8.37131e-10	2.12728e-10	Grin3a	GO:0042221//response to chemical;GO:0048468//cell development;GO:0048583//regulation of response to stimulus;GO:0032102//negative regulation of response to external stimulus;GO:0065007//biological regulation;GO:0030030//cell projection organization;GO:0097305//response to alcohol;GO:0045471//response to ethanol;GO:0050789//regulation of biological process;GO:0050877//nervous system process;GO:004…	K05213//glutamate receptor ionotropic, NMDA 3A+ko04024//cAMP signaling pathway+ko04724//Glutamatergic synapse+ko05034//Alcoholism+ko05033//Nicotine addiction+ko05031//Amphetamine addiction+ko05030//Cocaine addiction+ko04080//Neuroactive ligand-receptor interaction
244886	0.77	0.07	-3.45943	2.45875e-11	5.6014e-12	Tmem266	GO:0044425//membrane part;GO:0005623//cell;GO:0044464//cell part;GO:0044444//cytoplasmic part;GO:0031224//intrinsic component of membrane;GO:0016020//membrane;GO:0071944//cell periphery;GO:0016021//integral component of membrane;GO:0044424//intracellular part;GO:0005622//intracellular;GO:0005886//plasma membrane;GO:0005829//cytosol;GO:0005737//cytoplasm;GO:0022803//passive transmembrane transport…	K17382//serine beta-lactamase-like protein LACTB, mitochondrial;K22644//voltage-gated hydrogen channel 1;K17382//serine beta-lactamase-like protein LACTB, mitochondrial;K22644//voltage-gated hydrogen channel 1;K17382//serine beta-lactamase-like protein LACTB, mitochondrial;K22644//voltage-gated hydrogen channel 1;K17382//serine beta-lactamase-like protein LACTB, mitochondrial;K22644//voltage-gate…
28254	0.11	0	-3.45943	0.000936984	0.000440746	Slco1a6	GO:0009987//cellular process;GO:0048513//animal organ development;GO:0051234//establishment of localization;GO:0051186//cofactor metabolic process;GO:0015711//organic anion transport;GO:0051179//localization;GO:0048878//chemical homeostasis;GO:0044281//small molecule metabolic process;GO:0006629//lipid metabolic process;GO:0007275//multicellular organism development;GO:0006725//cellular aromatic …	K03460//solute carrier organic anion transporter family, member 1A+ko04976//Bile secretion
320265	0.11	0	-3.45943	0.00022264	9.5347e-05	Fam19a1		K07817//receptor-type tyrosine-protein phosphatase N [EC:3.1.3.48]+ko04940//Type I diabetes mellitus
327743	0.44	0.04	-3.45943	4.18665e-05	1.63558e-05	Wisp3	GO:0007155//cell adhesion;GO:0051239//regulation of multicellular organismal process;GO:0050793//regulation of developmental process;GO:0016525//negative regulation of angiogenesis;GO:0048519//negative regulation of biological process;GO:0008285//negative regulation of cell proliferation;GO:0048523//negative regulation of cellular process;GO:0050789//regulation of biological process;GO:0051128//r…	K22471//WNT1-inducible-signaling pathway protein 1+ko04310//Wnt signaling pathway
53310	0.11	0	-3.45943	0.000222215	9.5347e-05	Dlg3	GO:0050789//regulation of biological process;GO:0051174//regulation of phosphorus metabolic process;GO:0045197//establishment or maintenance of epithelial cell apical/basal polarity;GO:0007164//establishment of tissue polarity;GO:0007399//nervous system development;GO:0035305//negative regulation of dephosphorylation;GO:0031323//regulation of cellular metabolic process;GO:0048856//anatomical stru…	K21098//discs large protein 3+ko04390//Hippo signaling pathway+ko04530//Tight junction+ko05165//Human papillomavirus infection;K21098//discs large protein 3+ko04390//Hippo signaling pathway+ko04530//Tight junction+ko05165//Human papillomavirus infection;K21098//discs large protein 3+ko04390//Hippo signaling pathway+ko04530//Tight junction+ko05165//Human papillomavirus infection
629079	0.11	0	-3.45943	0.000937235	0.000440746	Vmn2r56	GO:0071944//cell periphery;GO:0031224//intrinsic component of membrane;GO:0016020//membrane;GO:0044425//membrane part;GO:0016021//integral component of membrane;GO:0005886//plasma membrane;GO:0044464//cell part;GO:0005623//cell;GO:0004872//receptor activity;GO:0099600//transmembrane receptor activity;GO:0038023//signaling receptor activity;GO:0060089//molecular transducer activity;GO:0004888//tra…	K04612//calcium-sensing receptor+ko04621//NOD-like receptor signaling pathway+ko04928//Parathyroid hormone synthesis, secretion and action
668940	0.11	0.01	-3.45943	1.46646e-05	5.42374e-06	Myh7b	GO:0099512//supramolecular fiber;GO:0015629//actin cytoskeleton;GO:0043234//protein complex;GO:0016459//myosin complex;GO:0005737//cytoplasm;GO:0044422//organelle part;GO:0032982//myosin filament;GO:0044464//cell part;GO:0043232//intracellular non-membrane-bounded organelle;GO:0043226//organelle;GO:0032991//macromolecular complex;GO:0043228//non-membrane-bounded organelle;GO:0005856//cytoskeleton…	K10352//myosin heavy chain+ko04530//Tight junction;K10352//myosin heavy chain+ko04530//Tight junction;K10352//myosin heavy chain+ko04530//Tight junction;K10352//myosin heavy chain+ko04530//Tight junction
67291	0.44	0.04	-3.45943	2.35788e-09	6.22076e-10	Ccdc137	GO:0043232//intracellular non-membrane-bounded organelle;GO:0043227//membrane-bounded organelle;GO:0005694//chromosome;GO:0031974//membrane-enclosed lumen;GO:0044464//cell part;GO:0005634//nucleus;GO:0031981//nuclear lumen;GO:0005622//intracellular;GO:0005730//nucleolus;GO:0001650//fibrillar center;GO:0044424//intracellular part;GO:0005623//cell;GO:0070013//intracellular organelle lumen;GO:004322…
68303	0.11	0	-3.45943	0.000456239	0.000204998	Fam114a1	GO:0070013//intracellular organelle lumen;GO:0043231//intracellular membrane-bounded organelle;GO:0005622//intracellular;GO:0044428//nuclear part;GO:0044422//organelle part;GO:0005623//cell;GO:0043227//membrane-bounded organelle;GO:0005737//cytoplasm;GO:0044424//intracellular part;GO:0044446//intracellular organelle part;GO:0043233//organelle lumen;GO:0043229//intracellular organelle;GO:0031974//…	K19607//X-linked retinitis pigmentosa GTPase regulator
68943	0.33	0.03	-3.45943	4.13791e-06	1.4435e-06	Pink1	GO:0022411//cellular component disassembly;GO:0061726//mitochondrion disassembly;GO:0070482//response to oxygen levels;GO:0006950//response to stress;GO:0007005//mitochondrion organization;GO:0006996//organelle organization;GO:0009056//catabolic process;GO:0006979//response to oxidative stress;GO:0016043//cellular component organization;GO:0000422//autophagy of mitochondrion;GO:0050896//response …	K05688//PTEN induced putative kinase 1 [EC:2.7.11.1]+ko04137//Mitophagy - animal+ko05012//Parkinson's disease
242125	0.85	0.08	-3.40939	4.48147e-21	6.10532e-22	Mab21l3		K17834//cyclic GMP-AMP synthase [EC:2.7.7.86]+ko04623//Cytosolic DNA-sensing pathway+ko05163//Human cytomegalovirus infection
30957	1.06	0.1	-3.40599	3.54049e-13	7.16584e-14	Mapk8ip3	GO:0030154//cell differentiation;GO:0050896//response to stimulus;GO:0045597//positive regulation of cell differentiation;GO:0007254//JNK cascade;GO:0010720//positive regulation of cell development;GO:0045595//regulation of cell differentiation;GO:0060284//regulation of cell development;GO:0071704//organic substance metabolic process;GO:0000187//activation of MAPK activity;GO:0009966//regulation …	K04436//mitogen-activated protein kinase 8 interacting protein 3+ko04010//MAPK signaling pathway;K04436//mitogen-activated protein kinase 8 interacting protein 3+ko04010//MAPK signaling pathway
58210	0.42	0.04	-3.39232	8.44304e-08	2.52732e-08	Sectm1b	GO:0050896//response to stimulus;GO:0006955//immune response;GO:0002376//immune system process;GO:0031224//intrinsic component of membrane;GO:0016020//membrane;GO:0044425//membrane part;GO:0016021//integral component of membrane;GO:0005102//receptor binding;GO:0030545//receptor regulator activity;GO:0005515//protein binding;GO:0005488//binding;GO:0048018//receptor ligand activity;GO:0098772//mole…	K06457//T-cell surface glycoprotein CD7+ko04640//Hematopoietic cell lineage
230674	1.14	0.11	-3.37346	5.20154e-22	6.80088e-23	Kdm4a	GO:0050789//regulation of biological process;GO:2000026//regulation of multicellular organismal development;GO:0048856//anatomical structure development;GO:0009991//response to extracellular stimulus;GO:0051172//negative regulation of nitrogen compound metabolic process;GO:0071840//cellular component organization or biogenesis;GO:0031329//regulation of cellular catabolic process;GO:0043412//macro…	K06709//jumonji domain-containing protein 2 [EC:1.14.11.-];K06709//jumonji domain-containing protein 2 [EC:1.14.11.-];K06709//jumonji domain-containing protein 2 [EC:1.14.11.-]
20341	1.45	0.14	-3.37255	7.68189e-17	1.2791e-17	Selenbp1	GO:0009987//cellular process;GO:0045444//fat cell differentiation;GO:0030154//cell differentiation;GO:0071705//nitrogen compound transport;GO:0051179//localization;GO:0006810//transport;GO:0050873//brown fat cell differentiation;GO:0015833//peptide transport;GO:0042886//amide transport;GO:0048869//cellular developmental process;GO:0032502//developmental process;GO:0051234//establishment of locali…	K17285//selenium-binding protein 1
110902	0.1	0	-3.32193	0.000222509	9.5347e-05	Chrna2	GO:0099537//trans-synaptic signaling;GO:0098655//cation transmembrane transport;GO:0044085//cellular component biogenesis;GO:0070271//protein complex biogenesis;GO:0034220//ion transmembrane transport;GO:0051716//cellular response to stimulus;GO:0023052//signaling;GO:0006812//cation transport;GO:0009636//response to toxic substance;GO:0007267//cell-cell signaling;GO:0043933//macromolecular comple…	K04804//nicotinic acetylcholine receptor alpha-2+ko04080//Neuroactive ligand-receptor interaction
11305	0.1	0	-3.32193	3.66672e-09	9.83342e-10	Abca2	GO:0031326//regulation of cellular biosynthetic process;GO:0060341//regulation of cellular localization;GO:0060255//regulation of macromolecule metabolic process;GO:0051049//regulation of transport;GO:0055092//sterol homeostasis;GO:2000112//regulation of cellular macromolecule biosynthetic process;GO:0050789//regulation of biological process;GO:0050794//regulation of cellular process;GO:0006355//…	K05642//ATP-binding cassette, subfamily A (ABC1), member 2+ko04142//Lysosome+ko02010//ABC transporters
13144	0.5	0.05	-3.32193	7.83542e-06	2.80306e-06	Dapk3	GO:0042981//regulation of apoptotic process;GO:0006355//regulation of transcription, DNA-templated;GO:0036211//protein modification process;GO:0006351//transcription, DNA-templated;GO:0010942//positive regulation of cell death;GO:0048523//negative regulation of cellular process;GO:0022008//neurogenesis;GO:0010647//positive regulation of cell communication;GO:0018107//peptidyl-threonine phosphoryl…	K08803//death-associated protein kinase [EC:2.7.11.1]+ko04140//Autophagy - animal+ko05219//Bladder cancer+ko05200//Pathways in cancer;K08803//death-associated protein kinase [EC:2.7.11.1]+ko04140//Autophagy - animal+ko05219//Bladder cancer+ko05200//Pathways in cancer
14200	0.4	0.04	-3.32193	0.000283998	0.000123594	Fhl2	GO:0051253//negative regulation of RNA metabolic process;GO:1901576//organic substance biosynthetic process;GO:0009892//negative regulation of metabolic process;GO:0016070//RNA metabolic process;GO:0031327//negative regulation of cellular biosynthetic process;GO:0001649//osteoblast differentiation;GO:0010605//negative regulation of macromolecule metabolic process;GO:0009653//anatomical structure …	K14380//four and a half LIM domains protein 2+ko04380//Osteoclast differentiation;K14380//four and a half LIM domains protein 2+ko04380//Osteoclast differentiation;K14380//four and a half LIM domains protein 2+ko04380//Osteoclast differentiation
15117	0.1	0	-3.32193	5.22837e-05	2.06266e-05	Has2	GO:0033554//cellular response to stress;GO:0001568//blood vessel development;GO:1901564//organonitrogen compound metabolic process;GO:0051171//regulation of nitrogen compound metabolic process;GO:0071356//cellular response to tumor necrosis factor;GO:0003008//system process;GO:0048522//positive regulation of cellular process;GO:0001655//urogenital system development;GO:0030203//glycosaminoglycan …	K00752//hyaluronan synthase [EC:2.4.1.212]
16796	0.1	0	-3.32193	0.000457394	0.000204998	Lasp1	GO:0051179//localization;GO:0051234//establishment of localization;GO:0006811//ion transport;GO:0006810//transport;GO:0043227//membrane-bounded organelle;GO:0044444//cytoplasmic part;GO:0043228//non-membrane-bounded organelle;GO:0005924//cell-substrate adherens junction;GO:0031982//vesicle;GO:0071944//cell periphery;GO:0005576//extracellular region;GO:0005623//cell;GO:0044464//cell part;GO:007006…	K18267//nebulin
16950	0.1	0	-3.32193	5.21171e-05	2.06266e-05	Loxl3	GO:0030324//lung development;GO:0030323//respiratory tube development;GO:0060255//regulation of macromolecule metabolic process;GO:1902106//negative regulation of leukocyte differentiation;GO:0050863//regulation of T cell activation;GO:0046637//regulation of alpha-beta T cell differentiation;GO:0043370//regulation of CD4-positive, alpha-beta T cell differentiation;GO:1903037//regulation of leukoc…	K00280//lysyl oxidase-like protein 2/3/4 [EC:1.4.3.-]
209195	0.1	0	-3.32193	0.000222247	9.5347e-05	Clic6	GO:0034220//ion transmembrane transport;GO:1902476//chloride transmembrane transport;GO:0015698//inorganic anion transport;GO:0098661//inorganic anion transmembrane transport;GO:0055085//transmembrane transport;GO:0098656//anion transmembrane transport;GO:0051179//localization;GO:0006821//chloride transport;GO:0006811//ion transport;GO:0006820//anion transport;GO:0098660//inorganic ion transmembr…	K05026//chloride intracellular channel protein 6
20928	0.1	0	-3.32193	3.36628e-08	9.77294e-09	Abcc9	GO:0043207//response to external biotic stimulus;GO:0006811//ion transport;GO:0006952//defense response;GO:0006813//potassium ion transport;GO:0050896//response to stimulus;GO:0009605//response to external stimulus;GO:0009607//response to biotic stimulus;GO:0030001//metal ion transport;GO:0042493//response to drug;GO:0051234//establishment of localization;GO:0051707//response to other organism;GO…	K05033//ATP-binding cassette subfamily C (CFTR/MRP) member 9+ko02010//ABC transporters
216795	0.1	0	-3.32193	0.000456559	0.000204998	Wnt9a	GO:0023052//signaling;GO:0031323//regulation of cellular metabolic process;GO:0052548//regulation of endopeptidase activity;GO:0007154//cell communication;GO:0035136//forelimb morphogenesis;GO:0009968//negative regulation of signal transduction;GO:0010646//regulation of cell communication;GO:0030178//negative regulation of Wnt signaling pathway;GO:0050794//regulation of cellular process;GO:004559…	K01064//wingless-type MMTV integration site family, member 9+ko04390//Hippo signaling pathway+ko05226//Gastric cancer+ko05225//Hepatocellular carcinoma+ko04916//Melanogenesis+ko04550//Signaling pathways regulating pluripotency of stem cells+ko04310//Wnt signaling pathway+ko05217//Basal cell carcinoma+ko05200//Pathways in cancer+ko05205//Proteoglycans in cancer+ko05224//Breast cancer+ko04934//Cush…
225471	0.1	0	-3.32193	0.000456623	0.000204998	Ticam2	GO:0001959//regulation of cytokine-mediated signaling pathway;GO:0045087//innate immune response;GO:0009966//regulation of signal transduction;GO:0045089//positive regulation of innate immune response;GO:0034097//response to cytokine;GO:0071396//cellular response to lipid;GO:0032682//negative regulation of chemokine production;GO:0006950//response to stress;GO:0002253//activation of immune respon…	K05409//TRIF-related adaptor molecule+ko05133//Pertussis+ko04217//Necroptosis+ko04620//Toll-like receptor signaling pathway+ko04064//NF-kappa B signaling pathway+ko05161//Hepatitis B
229715	0.1	0	-3.32193	2.81445e-06	9.65308e-07	Amigo1	GO:0045664//regulation of neuron differentiation;GO:1901381//positive regulation of potassium ion transmembrane transport;GO:0034765//regulation of ion transmembrane transport;GO:0044087//regulation of cellular component biogenesis;GO:0051960//regulation of nervous system development;GO:0008038//neuron recognition;GO:0051049//regulation of transport;GO:0007272//ensheathment of neurons;GO:0050769/…	K22529//amphoterin-induced protein
235534	0.1	0	-3.32193	0.000940515	0.000440746	Pxylp1	GO:0006024//glycosaminoglycan biosynthetic process;GO:0043170//macromolecule metabolic process;GO:0071704//organic substance metabolic process;GO:0031328//positive regulation of cellular biosynthetic process;GO:0030203//glycosaminoglycan metabolic process;GO:0034645//cellular macromolecule biosynthetic process;GO:0009101//glycoprotein biosynthetic process;GO:0050654//chondroitin sulfate proteogly…	K21403//2-phosphoxylose phosphatase [EC:3.1.3.-]
237029	0.1	0	-3.32193	0.000222117	9.5347e-05	4932411N23Rik	GO:0019222//regulation of metabolic process;GO:0060255//regulation of macromolecule metabolic process;GO:0050789//regulation of biological process;GO:0050794//regulation of cellular process;GO:1903506//regulation of nucleic acid-templated transcription;GO:0010556//regulation of macromolecule biosynthetic process;GO:0031323//regulation of cellular metabolic process;GO:2001141//regulation of RNA bi…	K21625//cyclin-D-binding Myb-like transcription factor 1
243277	0.2	0.02	-3.32193	2.65547e-06	9.05926e-07	Adgrd1	GO:0009987//cellular process;GO:0007154//cell communication;GO:0007166//cell surface receptor signaling pathway;GO:0050794//regulation of cellular process;GO:0007165//signal transduction;GO:0007186//G-protein coupled receptor signaling pathway;GO:0050789//regulation of biological process;GO:0023052//signaling;GO:0051716//cellular response to stimulus;GO:0050896//response to stimulus;GO:0065007//b…	K08465//G protein-coupled receptor 133
269643	0.1	0	-3.32193	0.000107941	4.43474e-05	Ppp2r2c	GO:0006796//phosphate-containing compound metabolic process;GO:0044237//cellular metabolic process;GO:0043170//macromolecule metabolic process;GO:0070262//peptidyl-serine dephosphorylation;GO:0032502//developmental process;GO:0009987//cellular process;GO:0071704//organic substance metabolic process;GO:0006793//phosphorus metabolic process;GO:0016311//dephosphorylation;GO:0007049//cell cycle;GO:00…	K04354//serine/threonine-protein phosphatase 2A regulatory subunit B+ko04391//Hippo signaling pathway - fly+ko04390//Hippo signaling pathway+ko04071//Sphingolipid signaling pathway+ko04728//Dopaminergic synapse+ko04261//Adrenergic signaling in cardiomyocytes+ko05142//Chagas disease (American trypanosomiasis)+ko04530//Tight junction+ko03015//mRNA surveillance pathway+ko04152//AMPK signaling pathwa…
27404	0.1	0.01	-3.32193	5.1009e-05	2.0069e-05	Abca8b	GO:0033036//macromolecule localization;GO:0071702//organic substance transport;GO:0051234//establishment of localization;GO:0006869//lipid transport;GO:0051179//localization;GO:0006810//transport;GO:0010876//lipid localization;GO:0031967//organelle envelope;GO:0005739//mitochondrion;GO:0016021//integral component of membrane;GO:0044424//intracellular part;GO:0031975//envelope;GO:0071944//cell per…	K05650//ATP-binding cassette, subfamily A (ABC1), member 8+ko02010//ABC transporters;K05650//ATP-binding cassette, subfamily A (ABC1), member 8+ko02010//ABC transporters;K05650//ATP-binding cassette, subfamily A (ABC1), member 8+ko02010//ABC transporters;K05650//ATP-binding cassette, subfamily A (ABC1), member 8+ko02010//ABC transporters
320873	0.1	0	-3.32193	0.000455919	0.000204998	Cdh10	GO:0007156//homophilic cell adhesion via plasma membrane adhesion molecules;GO:0007155//cell adhesion;GO:0098742//cell-cell adhesion via plasma-membrane adhesion molecules;GO:0098609//cell-cell adhesion;GO:0022610//biological adhesion;GO:0016021//integral component of membrane;GO:0044464//cell part;GO:0071944//cell periphery;GO:0005623//cell;GO:0031224//intrinsic component of membrane;GO:0044425/…	K06802//cadherin 10, type 2, T2-cadherin
50788	0.3	0.03	-3.32193	7.95401e-05	3.22274e-05	Fbxl8	GO:0003824//catalytic activity;GO:0019787//ubiquitin-like protein transferase activity;GO:0140096//catalytic activity, acting on a protein;GO:0004842//ubiquitin-protein transferase activity;GO:0016740//transferase activity;	K10274//F-box and leucine-rich repeat protein 8
73422	0.1	0	-3.32193	0.000221954	9.5347e-05	Prox2	GO:0044238//primary metabolic process;GO:0009653//anatomical structure morphogenesis;GO:1901576//organic substance biosynthetic process;GO:0007507//heart development;GO:0042692//muscle cell differentiation;GO:0045446//endothelial cell differentiation;GO:0001946//lymphangiogenesis;GO:0045892//negative regulation of transcription, DNA-templated;GO:0090304//nucleic acid metabolic process;GO:0070307/…	K20212//prospero homeobox 2;K20212//prospero homeobox 2
78894	0.3	0.03	-3.32193	4.06509e-07	1.28478e-07	Aacs	GO:0051716//cellular response to stimulus;GO:0071704//organic substance metabolic process;GO:0010817//regulation of hormone levels;GO:1903532//positive regulation of secretion by cell;GO:0042593//glucose homeostasis;GO:0071333//cellular response to glucose stimulus;GO:0051046//regulation of secretion;GO:0001889//liver development;GO:0032870//cellular response to hormone stimulus;GO:0060612//adipo…	K01907//acetoacetyl-CoA synthetase [EC:6.2.1.16]+ko00280//Valine, leucine and isoleucine degradation+ko00650//Butanoate metabolism
224805	0.49	0.05	-3.29278	1.66339e-11	3.74328e-12	Aars2	GO:0034641//cellular nitrogen compound metabolic process;GO:1901566//organonitrogen compound biosynthetic process;GO:0008152//metabolic process;GO:0065003//macromolecular complex assembly;GO:1901564//organonitrogen compound metabolic process;GO:0043039//tRNA aminoacylation;GO:0006725//cellular aromatic compound metabolic process;GO:0007005//mitochondrion organization;GO:0046483//heterocycle metab…	K01872//alanyl-tRNA synthetase [EC:6.1.1.7]+ko00970//Aminoacyl-tRNA biosynthesis
232714	0.29	0.03	-3.27302	7.25788e-17	1.20667e-17	Mgam	GO:0005615//extracellular space;GO:0070062//extracellular exosome;GO:0043227//membrane-bounded organelle;GO:0043230//extracellular organelle;GO:1903561//extracellular vesicle;GO:0043226//organelle;GO:0005576//extracellular region;GO:0031224//intrinsic component of membrane;GO:0044421//extracellular region part;GO:0044425//membrane part;GO:0016020//membrane;GO:0031982//vesicle;GO:0016021//integral…	K12047//maltase-glucoamylase [EC:3.2.1.20 3.2.1.3]+ko00052//Galactose metabolism+ko00500//Starch and sucrose metabolism+ko04973//Carbohydrate digestion and absorption+ko01100//Metabolic pathways
83553	0.28	0.03	-3.22239	2.7366e-05	1.04545e-05	Tktl1	GO:0008152//metabolic process;GO:0044424//intracellular part;GO:0043226//organelle;GO:0005737//cytoplasm;GO:0005623//cell;GO:0044464//cell part;GO:0043231//intracellular membrane-bounded organelle;GO:0005622//intracellular;GO:0005634//nucleus;GO:0043229//intracellular organelle;GO:0043227//membrane-bounded organelle;GO:0043169//cation binding;GO:0005488//binding;GO:0016744//transferase activity, …	K00615//transketolase [EC:2.2.1.1]+ko01200//Carbon metabolism+ko01230//Biosynthesis of amino acids+ko00030//Pentose phosphate pathway+ko01100//Metabolic pathways
78977	0.65	0.07	-3.21501	4.50572e-09	1.22113e-09	Popdc3	GO:0065007//biological regulation;GO:0065008//regulation of biological quality;GO:0042391//regulation of membrane potential;GO:0016020//membrane;GO:0044425//membrane part;GO:0016021//integral component of membrane;GO:0031224//intrinsic component of membrane;GO:0032555//purine ribonucleotide binding;GO:0030552//cAMP binding;GO:0032553//ribonucleotide binding;GO:0005488//binding;GO:0097159//organic…	K21108//blood vessel epicardial substance+ko04530//Tight junction
20128	0.83	0.09	-3.20511	4.16271e-21	5.66318e-22	Trim30a	GO:0044087//regulation of cellular component biogenesis;GO:0050794//regulation of cellular process;GO:2000377//regulation of reactive oxygen species metabolic process;GO:0045088//regulation of innate immune response;GO:0051707//response to other organism;GO:0050896//response to stimulus;GO:0043902//positive regulation of multi-organism process;GO:0080090//regulation of primary metabolic process;G…	K10648//tripartite motif-containing protein 5 [EC:2.3.2.27]
260408	0.83	0.09	-3.20511	2.15491e-07	6.6584e-08	Prss45	GO:0005576//extracellular region;GO:0004252//serine-type endopeptidase activity;GO:0140096//catalytic activity, acting on a protein;GO:0017171//serine hydrolase activity;GO:0004175//endopeptidase activity;GO:0008236//serine-type peptidase activity;GO:0016787//hydrolase activity;GO:0003824//catalytic activity;GO:0070011//peptidase activity, acting on L-amino acid peptides;GO:0008233//peptidase act…	K09640//transmembrane protease serine 9 [EC:3.4.21.-];K09628//serine protease 27 [EC:3.4.21.-];K01340//tryptase [EC:3.4.21.59]
110877	0.09	0	-3.16993	0.000222739	9.5347e-05	Slc18a1	GO:0098810//neurotransmitter reuptake;GO:0010035//response to inorganic substance;GO:0051581//negative regulation of neurotransmitter uptake;GO:0015842//aminergic neurotransmitter loading into synaptic vesicle;GO:0051610//serotonin uptake;GO:0099504//synaptic vesicle cycle;GO:0051716//cellular response to stimulus;GO:0060341//regulation of cellular localization;GO:0006811//ion transport;GO:200102…	K08155//MFS transporter, DHA1 family, solute carrier family 18 (vesicular amine transporter), member 1/2+ko04728//Dopaminergic synapse+ko04726//Serotonergic synapse+ko04721//Synaptic vesicle cycle+ko05034//Alcoholism+ko05031//Amphetamine addiction+ko05030//Cocaine addiction+ko05012//Parkinson's disease;K08155//MFS transporter, DHA1 family, solute carrier family 18 (vesicular amine transporter), m…
12337	0.09	0	-3.16993	0.000107644	4.43474e-05	Capn5	GO:0043170//macromolecule metabolic process;GO:0006508//proteolysis;GO:0006807//nitrogen compound metabolic process;GO:0019538//protein metabolic process;GO:0071704//organic substance metabolic process;GO:0008152//metabolic process;GO:1901564//organonitrogen compound metabolic process;GO:0044238//primary metabolic process;GO:0005925//focal adhesion;GO:0043230//extracellular organelle;GO:0070062//…	K08574//calpain-5 [EC:3.4.22.-]
13507	0.09	0	-3.16993	2.52336e-05	9.59372e-06	Dsc3	GO:0009790//embryo development;GO:0007155//cell adhesion;GO:0050821//protein stabilization;GO:0007275//multicellular organism development;GO:0031647//regulation of protein stability;GO:0009792//embryo development ending in birth or egg hatching;GO:0098609//cell-cell adhesion;GO:0098742//cell-cell adhesion via plasma-membrane adhesion molecules;GO:0065008//regulation of biological quality;GO:00488…	K07602//desmocollin 3;K07602//desmocollin 3;K07602//desmocollin 3
20443	0.36	0.04	-3.16993	1.46671e-05	5.42374e-06	St3gal4		K03494//beta-galactoside alpha-2,3-sialyltransferase (sialyltransferase 4C) [EC:2.4.99.4]+ko00601//Glycosphingolipid biosynthesis - lacto and neolacto series+ko01100//Metabolic pathways
209478	0.09	0	-3.16993	0.000940009	0.000440746	Tbc1d12	GO:0016241//regulation of macroautophagy;GO:0043087//regulation of GTPase activity;GO:0065007//biological regulation;GO:0051128//regulation of cellular component organization;GO:0050790//regulation of catalytic activity;GO:0015031//protein transport;GO:0009894//regulation of catabolic process;GO:0065009//regulation of molecular function;GO:0071702//organic substance transport;GO:0015833//peptide …	K20167//TBC1 domain family member 14;K19475//WAS/WASL-interacting protein+ko04144//Endocytosis
225743	0.18	0.02	-3.16993	2.07862e-09	5.45776e-10	Rnf165	GO:0042787//protein ubiquitination involved in ubiquitin-dependent protein catabolic process;GO:0120039//plasma membrane bounded cell projection morphogenesis;GO:0042221//response to chemical;GO:0120036//plasma membrane bounded cell projection organization;GO:0032989//cellular component morphogenesis;GO:0031323//regulation of cellular metabolic process;GO:0032501//multicellular organismal process…	K11093//U1 small nuclear ribonucleoprotein 70kDa+ko03040//Spliceosome
233781	0.18	0.02	-3.16993	7.95153e-05	3.22274e-05	Xylt1	GO:0030201//heparan sulfate proteoglycan metabolic process;GO:0006024//glycosaminoglycan biosynthetic process;GO:0006029//proteoglycan metabolic process;GO:0006082//organic acid metabolic process;GO:0009100//glycoprotein metabolic process;GO:0051716//cellular response to stimulus;GO:1901564//organonitrogen compound metabolic process;GO:0043436//oxoacid metabolic process;GO:1901566//organonitrogen…	K00771//protein xylosyltransferase [EC:2.4.2.26]+ko00532//Glycosaminoglycan biosynthesis - chondroitin sulfate / dermatan sulfate+ko00534//Glycosaminoglycan biosynthesis - heparan sulfate / heparin+ko01100//Metabolic pathways
382014	0.09	0	-3.16993	0.00093963	0.000440746	Ano8	GO:0015698//inorganic anion transport;GO:0051234//establishment of localization;GO:0006811//ion transport;GO:0006820//anion transport;GO:0006821//chloride transport;GO:0051179//localization;GO:0006810//transport;GO:0071944//cell periphery;GO:0005886//plasma membrane;GO:0044425//membrane part;GO:0016020//membrane;GO:0005622//intracellular;GO:0005623//cell;GO:0031224//intrinsic component of membran…	K19502//anoctamin-8;K19502//anoctamin-8;K19502//anoctamin-8;K19502//anoctamin-8;K19502//anoctamin-8
74675	0.09	0	-3.16993	0.000938999	0.000440746	Ptchd3	GO:0036126//sperm flagellum;GO:0042995//cell projection;GO:0044425//membrane part;GO:0044441//ciliary part;GO:0044463//cell projection part;GO:0097223//sperm part;GO:0016021//integral component of membrane;GO:0044464//cell part;GO:0016020//membrane;GO:0120025//plasma membrane bounded cell projection;GO:0043226//organelle;GO:0005929//cilium;GO:0031224//intrinsic component of membrane;GO:0097225//s…	K12385//Niemann-Pick C1 protein+ko04142//Lysosome+ko04979//Cholesterol metabolism
76809	0.09	0	-3.16993	3.09915e-07	9.71282e-08	Bri3bp	GO:0005741//mitochondrial outer membrane;GO:0031090//organelle membrane;GO:0098588//bounding membrane of organelle;GO:0043227//membrane-bounded organelle;GO:0019867//outer membrane;GO:0044446//intracellular organelle part;GO:0016021//integral component of membrane;GO:0044444//cytoplasmic part;GO:0005739//mitochondrion;GO:0005740//mitochondrial envelope;GO:0043229//intracellular organelle;GO:00432…
17937	0.71	0.08	-3.14975	2.45964e-12	5.27144e-13	Nab2	GO:0048856//anatomical structure development;GO:0010467//gene expression;GO:0045937//positive regulation of phosphate metabolic process;GO:0007399//nervous system development;GO:0010604//positive regulation of macromolecule metabolic process;GO:0043170//macromolecule metabolic process;GO:0009987//cellular process;GO:0032270//positive regulation of cellular protein metabolic process;GO:0001958//en…	K22388//NGFI-A-binding protein
241794	0.26	0.03	-3.11548	0.000560308	0.000254586	Kcng1	GO:0006811//ion transport;GO:0071822//protein complex subunit organization;GO:0043269//regulation of ion transport;GO:0034765//regulation of ion transmembrane transport;GO:0006810//transport;GO:0032409//regulation of transporter activity;GO:0043266//regulation of potassium ion transport;GO:0030001//metal ion transport;GO:0050794//regulation of cellular process;GO:1901379//regulation of potassium …	K04900//potassium voltage-gated channel subfamily G member 1
114304	0.17	0.02	-3.08746	4.13865e-06	1.4435e-06	Slc28a3	GO:0051179//localization;GO:1901642//nucleoside transmembrane transport;GO:0006810//transport;GO:0051234//establishment of localization;GO:0071702//organic substance transport;GO:0071705//nitrogen compound transport;GO:0015931//nucleobase-containing compound transport;GO:0015864//pyrimidine nucleoside transport;GO:0015860//purine nucleoside transmembrane transport;GO:0055085//transmembrane transp…	K11536//pyrimidine nucleoside transport protein
77613	0.76	0.09	-3.078	3.1436e-10	7.76432e-11	Prss36	GO:0005623//cell;GO:0044424//intracellular part;GO:0005622//intracellular;GO:0005737//cytoplasm;GO:0044464//cell part;GO:0008233//peptidase activity;GO:0140096//catalytic activity, acting on a protein;GO:0004175//endopeptidase activity;GO:0003824//catalytic activity;GO:0008236//serine-type peptidase activity;GO:0016787//hydrolase activity;GO:0004252//serine-type endopeptidase activity;GO:0070011/…	K09630//polyserase 2 [EC:3.4.21.-];K09630//polyserase 2 [EC:3.4.21.-]
100041621	0.42	0.05	-3.07039	5.92609e-06	2.09422e-06	Gm3435
326618	1.15	0.14	-3.03814	1.57583e-15	2.78988e-16	Tpm4	GO:0009987//cellular process;GO:0003012//muscle system process;GO:0006936//muscle contraction;GO:0007010//cytoskeleton organization;GO:0007015//actin filament organization;GO:0001503//ossification;GO:0016043//cellular component organization;GO:0048869//cellular developmental process;GO:0030036//actin cytoskeleton organization;GO:0030154//cell differentiation;GO:0030029//actin filament-based proce…	K10375//tropomyosin 4+ko05414//Dilated cardiomyopathy (DCM)+ko05410//Hypertrophic cardiomyopathy (HCM)+ko04261//Adrenergic signaling in cardiomyocytes+ko04260//Cardiac muscle contraction
68922	0.41	0.05	-3.03562	4.75163e-07	1.51135e-07	Dnaic1	GO:0051674//localization of cell;GO:0060271//cilium assembly;GO:0034622//cellular macromolecular complex assembly;GO:1901653//cellular response to peptide;GO:0007275//multicellular organism development;GO:1901699//cellular response to nitrogen compound;GO:0071495//cellular response to endogenous stimulus;GO:0000226//microtubule cytoskeleton organization;GO:0071417//cellular response to organonitr…	K10409//dynein intermediate chain 1, axonemal+ko05016//Huntington's disease
26432	0.65	0.08	-3.02237	1.84921e-15	3.28554e-16	Plod2	GO:0044267//cellular protein metabolic process;GO:0043412//macromolecule modification;GO:0006082//organic acid metabolic process;GO:0009628//response to abiotic stimulus;GO:0044283//small molecule biosynthetic process;GO:0018126//protein hydroxylation;GO:0019752//carboxylic acid metabolic process;GO:1901607//alpha-amino acid biosynthetic process;GO:0070482//response to oxygen levels;GO:0044260//c…	K13645//procollagen-lysine,2-oxoglutarate 5-dioxygenase 2 [EC:1.14.11.4]+ko00310//Lysine degradation
110208	3.14	0.39	-3.00922	1.09885e-35	8.82964e-37	Pgd	GO:0046483//heterocycle metabolic process;GO:0005975//carbohydrate metabolic process;GO:0019521//D-gluconate metabolic process;GO:0006098//pentose-phosphate shunt;GO:0019520//aldonic acid metabolic process;GO:0019682//glyceraldehyde-3-phosphate metabolic process;GO:0046364//monosaccharide biosynthetic process;GO:0006732//coenzyme metabolic process;GO:0006793//phosphorus metabolic process;GO:00160…	K00033//6-phosphogluconate dehydrogenase [EC:1.1.1.44 1.1.1.343]+ko01200//Carbon metabolism+ko00480//Glutathione metabolism+ko00030//Pentose phosphate pathway+ko01100//Metabolic pathways;K00033//6-phosphogluconate dehydrogenase [EC:1.1.1.44 1.1.1.343]+ko01200//Carbon metabolism+ko00480//Glutathione metabolism+ko00030//Pentose phosphate pathway+ko01100//Metabolic pathways
18583	0.08	0	-3	0.000940262	0.000440746	Pde7a	GO:0009987//cellular process;GO:0023052//signaling;GO:0007165//signal transduction;GO:0006195//purine nucleotide catabolic process;GO:1901564//organonitrogen compound metabolic process;GO:0009154//purine ribonucleotide catabolic process;GO:0044248//cellular catabolic process;GO:1901136//carbohydrate derivative catabolic process;GO:0034655//nucleobase-containing compound catabolic process;GO:00196…	K18436//high affinity cAMP-specific 3',5'-cyclic phosphodiesterase 7 [EC:3.1.4.53]+ko00230//Purine metabolism+ko05032//Morphine addiction;K18436//high affinity cAMP-specific 3',5'-cyclic phosphodiesterase 7 [EC:3.1.4.53]+ko00230//Purine metabolism+ko05032//Morphine addiction
208777	0.16	0.02	-3	3.79205e-10	9.44964e-11	Sned1	GO:0031589//cell-substrate adhesion;GO:0022610//biological adhesion;GO:0007160//cell-matrix adhesion;GO:0007155//cell adhesion;GO:0044421//extracellular region part;GO:1903561//extracellular vesicle;GO:0070062//extracellular exosome;GO:0043227//membrane-bounded organelle;GO:0043226//organelle;GO:0043230//extracellular organelle;GO:0005576//extracellular region;GO:0005615//extracellular space;GO:0…	K02599//Notch 1+ko04320//Dorso-ventral axis formation+ko01522//Endocrine resistance+ko04919//Thyroid hormone signaling pathway+ko04658//Th1 and Th2 cell differentiation+ko05020//Prion diseases+ko05200//Pathways in cancer+ko05206//MicroRNAs in cancer+ko05224//Breast cancer+ko04330//Notch signaling pathway+ko05165//Human papillomavirus infection
223332	0.08	0	-3	0.000456816	0.000204998	Ranbp3l	GO:0090068//positive regulation of cell cycle process;GO:0051726//regulation of cell cycle;GO:0046605//regulation of centrosome cycle;GO:0051345//positive regulation of hydrolase activity;GO:0044237//cellular metabolic process;GO:0045595//regulation of cell differentiation;GO:0051495//positive regulation of cytoskeleton organization;GO:0032501//multicellular organismal process;GO:0044265//cellula…	K15304//Ran-binding protein 3+ko05166//HTLV-I infection
23792	0.08	0	-3	5.88339e-06	2.07542e-06	Adam23	GO:0071345//cellular response to cytokine stimulus;GO:1990830//cellular response to leukemia inhibitory factor;GO:0050896//response to stimulus;GO:0022610//biological adhesion;GO:0051716//cellular response to stimulus;GO:0042221//response to chemical;GO:0009987//cellular process;GO:0070887//cellular response to chemical stimulus;GO:0071310//cellular response to organic substance;GO:1990823//respo…	K06837//disintegrin and metalloproteinase domain-containing protein 23 [EC:3.4.24.-]
240753	0.08	0	-3	1.4808e-07	4.51758e-08	Plekha6		K05632//E3 ubiquitin-protein ligase Itchy [EC:2.3.2.26]+ko04144//Endocytosis+ko04668//TNF signaling pathway+ko04120//Ubiquitin mediated proteolysis+ko04932//Non-alcoholic fatty liver disease (NAFLD);K05633//NEDD4-like E3 ubiquitin-protein ligase WWP1 [EC:2.3.2.26]+ko04144//Endocytosis+ko04120//Ubiquitin mediated proteolysis;K20642//Rho GTPase-activating protein 22/24/25;K05632//E3 ubiquitin-prote…
270190	0.08	0	-3	0.000222542	9.5347e-05	Ephb1	GO:0065008//regulation of biological quality;GO:0009581//detection of external stimulus;GO:0006928//movement of cell or subcellular component;GO:0051674//localization of cell;GO:0050793//regulation of developmental process;GO:0032502//developmental process;GO:0051716//cellular response to stimulus;GO:2001015//negative regulation of skeletal muscle cell differentiation;GO:0008152//metabolic proces…	K05110//Eph receptor B1 [EC:2.7.10.1]+ko04360//Axon guidance;K05111//Eph receptor B2 [EC:2.7.10.1]+ko04360//Axon guidance
64297	0.08	0	-3	0.000222052	9.5347e-05	Gprc5b	GO:0023051//regulation of signaling;GO:0051173//positive regulation of nitrogen compound metabolic process;GO:0033500//carbohydrate homeostasis;GO:0050767//regulation of neurogenesis;GO:0050729//positive regulation of inflammatory response;GO:0051174//regulation of phosphorus metabolic process;GO:0031347//regulation of defense response;GO:0051247//positive regulation of protein metabolic process;…	K04619//G protein-coupled receptor family C group 5 member B
77629	0.08	0	-3	6.47426e-07	2.08826e-07	Sphkap	GO:0010646//regulation of cell communication;GO:0065007//biological regulation;GO:0048583//regulation of response to stimulus;GO:0023051//regulation of signaling;GO:0009966//regulation of signal transduction;GO:1902531//regulation of intracellular signal transduction;GO:0050789//regulation of biological process;GO:0050794//regulation of cellular process;GO:0010738//regulation of protein kinase A …	K16527//A-kinase anchor protein 11
98402	1.12	0.14	-3	2.58034e-26	2.8562e-27	Sh3bp4	GO:0031323//regulation of cellular metabolic process;GO:0001558//regulation of cell growth;GO:0065009//regulation of molecular function;GO:0016192//vesicle-mediated transport;GO:0031331//positive regulation of cellular catabolic process;GO:0043086//negative regulation of catalytic activity;GO:1901698//response to nitrogen compound;GO:1902532//negative regulation of intracellular signal transducti…	K20066//SH3 domain-binding protein 4
BGI_novel_G000024	0.08	0	-3	3.10415e-07	9.71282e-08	BGI_novel_G000024	GO:0048869//cellular developmental process;GO:0009790//embryo development;GO:0006325//chromatin organization;GO:0007423//sensory organ development;GO:0002009//morphogenesis of an epithelium;GO:0060113//inner ear receptor cell differentiation;GO:0048731//system development;GO:0001842//neural fold formation;GO:0044703//multi-organism reproductive process;GO:0016043//cellular component organization;…	K06062//histone acetyltransferase [EC:2.3.1.48]+ko04919//Thyroid hormone signaling pathway+ko05203//Viral carcinogenesis+ko04330//Notch signaling pathway+ko05166//HTLV-I infection;K11728//nucleosome-remodeling factor subunit BPTF
16801	0.78	0.1	-2.96347	4.41344e-17	7.24856e-18	Arhgef1	GO:0035023//regulation of Rho protein signal transduction;GO:0010646//regulation of cell communication;GO:0009966//regulation of signal transduction;GO:0023051//regulation of signaling;GO:0048583//regulation of response to stimulus;GO:0050789//regulation of biological process;GO:0051056//regulation of small GTPase mediated signal transduction;GO:1902531//regulation of intracellular signal transdu…	K12330//Rho guanine nucleotide exchange factor 1+ko04810//Regulation of actin cytoskeleton+ko04611//Platelet activation+ko05200//Pathways in cancer+ko05205//Proteoglycans in cancer+ko04270//Vascular smooth muscle contraction+ko04928//Parathyroid hormone synthesis, secretion and action+ko05163//Human cytomegalovirus infection;K12330//Rho guanine nucleotide exchange factor 1+ko04810//Regulation of …
21386	0.31	0.04	-2.9542	3.79109e-10	9.44964e-11	Tbx3	GO:0035107//appendage morphogenesis;GO:0060921//sinoatrial node cell differentiation;GO:0050789//regulation of biological process;GO:0060788//ectodermal placode formation;GO:0009880//embryonic pattern specification;GO:0051093//negative regulation of developmental process;GO:0051254//positive regulation of RNA metabolic process;GO:0071704//organic substance metabolic process;GO:0060911//cardiac ce…	K10177//T-box protein 3+ko04550//Signaling pathways regulating pluripotency of stem cells
434156	0.31	0.04	-2.9542	3.02797e-05	1.16402e-05	Eid2b	GO:0010468//regulation of gene expression;GO:0065007//biological regulation;GO:0048519//negative regulation of biological process;GO:0045934//negative regulation of nucleobase-containing compound metabolic process;GO:0045662//negative regulation of myoblast differentiation;GO:0080090//regulation of primary metabolic process;GO:0006355//regulation of transcription, DNA-templated;GO:0050793//regula…	K19720//collagen, type III, alpha+ko04933//AGE-RAGE signaling pathway in diabetic complications+ko04611//Platelet activation+ko05146//Amoebiasis+ko04974//Protein digestion and absorption+ko04926//Relaxin signaling pathway;K13171//serine/arginine repetitive matrix protein 1+ko03013//RNA transport+ko03015//mRNA surveillance pathway
76804	0.31	0.04	-2.9542	1.49235e-08	4.22244e-09	Kdm4c	GO:0019222//regulation of metabolic process;GO:0034645//cellular macromolecule biosynthetic process;GO:0051960//regulation of nervous system development;GO:0045595//regulation of cell differentiation;GO:0006325//chromatin organization;GO:0018130//heterocycle biosynthetic process;GO:2000036//regulation of stem cell population maintenance;GO:0051240//positive regulation of multicellular organismal …	K06709//jumonji domain-containing protein 2 [EC:1.14.11.-];K06709//jumonji domain-containing protein 2 [EC:1.14.11.-];K06709//jumonji domain-containing protein 2 [EC:1.14.11.-];K06709//jumonji domain-containing protein 2 [EC:1.14.11.-]
11650	0.54	0.07	-2.94753	7.39005e-08	2.2028e-08	Alppl2	GO:0043232//intracellular non-membrane-bounded organelle;GO:0044424//intracellular part;GO:0044425//membrane part;GO:0005886//plasma membrane;GO:0030016//myofibril;GO:0043229//intracellular organelle;GO:0071944//cell periphery;GO:0031225//anchored component of membrane;GO:0016020//membrane;GO:0005737//cytoplasm;GO:0043292//contractile fiber;GO:0044444//cytoplasmic part;GO:0099081//supramolecular …	K01077//alkaline phosphatase [EC:3.1.3.1]+ko00730//Thiamine metabolism+ko01100//Metabolic pathways+ko00790//Folate biosynthesis
21379	1.52	0.2	-2.926	2.87561e-26	3.1921e-27	Tbrg4	GO:0045333//cellular respiration;GO:0044237//cellular metabolic process;GO:0009987//cellular process;GO:0008152//metabolic process;GO:0055114//oxidation-reduction process;GO:0015980//energy derivation by oxidation of organic compounds;GO:0006091//generation of precursor metabolites and energy;GO:0005737//cytoplasm;GO:0043227//membrane-bounded organelle;GO:0005623//cell;GO:0005622//intracellular;G…	K18190//FAST kinase domain-containing protein 2
12889	0.45	0.06	-2.90689	8.7634e-07	2.8537e-07	Cplx1	GO:0099537//trans-synaptic signaling;GO:0006836//neurotransmitter transport;GO:0007267//cell-cell signaling;GO:0008104//protein localization;GO:0007154//cell communication;GO:0071702//organic substance transport;GO:0097480//establishment of synaptic vesicle localization;GO:0015833//peptide transport;GO:0033036//macromolecule localization;GO:0051648//vesicle localization;GO:0023052//signaling;GO:0…	K15294//complexin-1/2+ko04721//Synaptic vesicle cycle
319513	0.6	0.08	-2.90689	2.60623e-10	6.40092e-11	Pced1a
54204	0.45	0.06	-2.90689	0.000283916	0.000123594	2018-09-01	GO:0006996//organelle organization;GO:0051303//establishment of chromosome localization;GO:0051321//meiotic cell cycle;GO:0016043//cellular component organization;GO:0051234//establishment of localization;GO:0071840//cellular component organization or biogenesis;GO:0019953//sexual reproduction;GO:0051179//localization;GO:0007276//gamete generation;GO:0051649//establishment of localization in cell…	K13737//septin 1+ko05100//Bacterial invasion of epithelial cells
17156	0.52	0.07	-2.89308	1.97521e-26	2.17018e-27	Man1a2	GO:0071704//organic substance metabolic process;GO:1901135//carbohydrate derivative metabolic process;GO:0032502//developmental process;GO:0009059//macromolecule biosynthetic process;GO:0044249//cellular biosynthetic process;GO:0043413//macromolecule glycosylation;GO:0009100//glycoprotein metabolic process;GO:0048856//anatomical structure development;GO:0044237//cellular metabolic process;GO:0060…	K01230//mannosyl-oligosaccharide alpha-1,2-mannosidase [EC:3.2.1.113]+ko04141//Protein processing in endoplasmic reticulum+ko00510//N-Glycan biosynthesis+ko01100//Metabolic pathways
16987	0.96	0.13	-2.88452	1.33832e-25	1.51938e-26	Lss	GO:1901615//organic hydroxy compound metabolic process;GO:1901360//organic cyclic compound metabolic process;GO:0065007//biological regulation;GO:0006694//steroid biosynthetic process;GO:0006629//lipid metabolic process;GO:0008610//lipid biosynthetic process;GO:1901362//organic cyclic compound biosynthetic process;GO:0016125//sterol metabolic process;GO:1901576//organic substance biosynthetic pro…	K01852//lanosterol synthase [EC:5.4.99.7]+ko00100//Steroid biosynthesis+ko01100//Metabolic pathways;K01852//lanosterol synthase [EC:5.4.99.7]+ko00100//Steroid biosynthesis+ko01100//Metabolic pathways;K01852//lanosterol synthase [EC:5.4.99.7]+ko00100//Steroid biosynthesis+ko01100//Metabolic pathways
218215	0.22	0.03	-2.87447	1.69505e-06	5.67368e-07	Rnf144b	GO:1901800//positive regulation of proteasomal protein catabolic process;GO:0009896//positive regulation of catabolic process;GO:0044265//cellular macromolecule catabolic process;GO:0042176//regulation of protein catabolic process;GO:0008219//cell death;GO:0043067//regulation of programmed cell death;GO:1903050//regulation of proteolysis involved in cellular protein catabolic process;GO:0032270//…	K11975//E3 ubiquitin-protein ligase RNF144 [EC:2.3.2.31]
212733	0.71	0.1	-2.82782	8.14167e-09	2.25584e-09	Ccdc64b	GO:0019899//enzyme binding;GO:0031267//small GTPase binding;GO:0017137//Rab GTPase binding;GO:0005488//binding;GO:0005515//protein binding;GO:0017016//Ras GTPase binding;GO:0051020//GTPase binding;	K16756//coiled-coil domain-containing protein 64
243634	2.9	0.41	-2.82236	1.03773e-43	6.74804e-45	Ano2	GO:0051234//establishment of localization;GO:0006810//transport;GO:0015698//inorganic anion transport;GO:0006821//chloride transport;GO:0006820//anion transport;GO:0051179//localization;GO:0006811//ion transport;GO:0005929//cilium;GO:0034702//ion channel complex;GO:0005622//intracellular;GO:0005623//cell;GO:0031974//membrane-enclosed lumen;GO:0016020//membrane;GO:1902495//transmembrane transporte…	K19497//anoctamin-2+ko04740//Olfactory transduction;K19497//anoctamin-2+ko04740//Olfactory transduction
100504524	0.07	0	-2.80735	0.000936733	0.000440746	Cisd3b	GO:0005739//mitochondrion;GO:0043229//intracellular organelle;GO:0044444//cytoplasmic part;GO:0043227//membrane-bounded organelle;GO:0044424//intracellular part;GO:0043231//intracellular membrane-bounded organelle;GO:0005622//intracellular;GO:0005737//cytoplasm;GO:0043226//organelle;GO:0044464//cell part;GO:0005623//cell;GO:0046872//metal ion binding;GO:0048037//cofactor binding;GO:0005488//bindi…	K09580//protein disulfide-isomerase A1 [EC:5.3.4.1]+ko04141//Protein processing in endoplasmic reticulum
101497	0.07	0	-2.80735	0.000939504	0.000440746	Plekhg2	GO:0030832//regulation of actin filament length;GO:1902903//regulation of supramolecular fiber organization;GO:0032970//regulation of actin filament-based process;GO:0090066//regulation of anatomical structure size;GO:0016043//cellular component organization;GO:0032956//regulation of actin cytoskeleton organization;GO:1902531//regulation of intracellular signal transduction;GO:0023051//regulation…	K16463//centrosomal protein CEP170;K05769//Rho guanine nucleotide exchange factor 4/29+ko04810//Regulation of actin cytoskeleton;K20685//guanine nucleotide exchange factor MCF2
17879	0.07	0	-2.80735	5.23088e-05	2.06266e-05	Myh1	GO:0006936//muscle contraction;GO:0003008//system process;GO:0003012//muscle system process;GO:0032501//multicellular organismal process;GO:0043226//organelle;GO:0005622//intracellular;GO:0099081//supramolecular polymer;GO:0044464//cell part;GO:0099080//supramolecular complex;GO:0043229//intracellular organelle;GO:0031672//A band;GO:0016460//myosin II complex;GO:0043232//intracellular non-membran…	K10352//myosin heavy chain+ko04530//Tight junction
192897	0.07	0	-2.80735	5.23256e-05	2.06266e-05	Itgb4	GO:0007369//gastrulation;GO:0048729//tissue morphogenesis;GO:0032502//developmental process;GO:0042475//odontogenesis of dentin-containing tooth;GO:0051716//cellular response to stimulus;GO:0048332//mesoderm morphogenesis;GO:0040011//locomotion;GO:0050794//regulation of cellular process;GO:0048646//anatomical structure formation involved in morphogenesis;GO:0022607//cellular component assembly;GO…	K06525//integrin beta 4+ko05414//Dilated cardiomyopathy (DCM)+ko05410//Hypertrophic cardiomyopathy (HCM)+ko05412//Arrhythmogenic right ventricular cardiomyopathy (ARVC)+ko04810//Regulation of actin cytoskeleton+ko04512//ECM-receptor interaction+ko04510//Focal adhesion+ko04151//PI3K-Akt signaling pathway+ko05165//Human papillomavirus infection;K06525//integrin beta 4+ko05414//Dilated cardiomyopath…
209456	0.07	0	-2.80735	0.000938872	0.000440746	Trp53bp2	GO:0048513//animal organ development;GO:0097193//intrinsic apoptotic signaling pathway;GO:0007275//multicellular organism development;GO:0048522//positive regulation of cellular process;GO:0006915//apoptotic process;GO:0010942//positive regulation of cell death;GO:0051716//cellular response to stimulus;GO:0007507//heart development;GO:0035556//intracellular signal transduction;GO:0032502//develop…	K16823//apoptosis-stimulating of p53 protein 2+ko04390//Hippo signaling pathway
27205	0.07	0	-2.80735	0.000222476	9.5347e-05	Podxl	GO:0072311//glomerular epithelial cell differentiation;GO:0035148//tube formation;GO:0035239//tube morphogenesis;GO:0051272//positive regulation of cellular component movement;GO:0032534//regulation of microvillus assembly;GO:0030154//cell differentiation;GO:2000147//positive regulation of cell motility;GO:0050789//regulation of biological process;GO:0040017//positive regulation of locomotion;GO:…	K06817//podocalyxin-like
378425	0.21	0.03	-2.80735	2.9299e-06	1.00676e-06	Nlrp12	GO:0051252//regulation of RNA metabolic process;GO:0032269//negative regulation of cellular protein metabolic process;GO:0051239//regulation of multicellular organismal process;GO:0048519//negative regulation of biological process;GO:1904591//positive regulation of protein import;GO:0050896//response to stimulus;GO:1902532//negative regulation of intracellular signal transduction;GO:1901222//regu…	K20865//NACHT, LRR and PYD domains-containing protein 12+ko04621//NOD-like receptor signaling pathway
622699	0.07	0	-2.80735	5.2142e-05	2.06266e-05	Gm12569
69743	0.07	0	-2.80735	0.000456174	0.000204998	Casz1	GO:0001754//eye photoreceptor cell differentiation;GO:0034645//cellular macromolecule biosynthetic process;GO:0009893//positive regulation of metabolic process;GO:0044271//cellular nitrogen compound biosynthetic process;GO:1901360//organic cyclic compound metabolic process;GO:1902680//positive regulation of RNA biosynthetic process;GO:0097659//nucleic acid-templated transcription;GO:2001141//regu…	K10955//mucin-2+ko05226//Gastric cancer+ko05146//Amoebiasis;K10955//mucin-2+ko05226//Gastric cancer+ko05146//Amoebiasis;K10955//mucin-2+ko05226//Gastric cancer+ko05146//Amoebiasis
70363	0.07	0.01	-2.80735	7.95029e-05	3.22274e-05	Fam135b	GO:0044255//cellular lipid metabolic process;GO:0044238//primary metabolic process;GO:0071704//organic substance metabolic process;GO:0006629//lipid metabolic process;GO:0008152//metabolic process;GO:0009987//cellular process;GO:0044237//cellular metabolic process;GO:0003824//catalytic activity;GO:0052689//carboxylic ester hydrolase activity;GO:0016787//hydrolase activity;GO:0016788//hydrolase ac…
71918	0.07	0	-2.80735	0.000456303	0.000204998	Zcchc24	GO:0097159//organic cyclic compound binding;GO:0046914//transition metal ion binding;GO:0003723//RNA binding;GO:0003676//nucleic acid binding;GO:0043167//ion binding;GO:1901363//heterocyclic compound binding;GO:0008270//zinc ion binding;GO:0046872//metal ion binding;GO:0005488//binding;GO:0043169//cation binding;
76184	0.07	0	-2.80735	0.000221986	9.5347e-05	Abca6	GO:0051234//establishment of localization;GO:0010876//lipid localization;GO:0033036//macromolecule localization;GO:0006810//transport;GO:0051179//localization;GO:0006869//lipid transport;GO:0071702//organic substance transport;GO:0044446//intracellular organelle part;GO:0043231//intracellular membrane-bounded organelle;GO:0043227//membrane-bounded organelle;GO:0016020//membrane;GO:0031224//intrin…	K05649//ATP-binding cassette, subfamily A (ABC1), member 6+ko02010//ABC transporters;K05649//ATP-binding cassette, subfamily A (ABC1), member 6+ko02010//ABC transporters;K05649//ATP-binding cassette, subfamily A (ABC1), member 6+ko02010//ABC transporters
77781	0.07	0	-2.80735	2.81652e-06	9.65308e-07	Epm2aip1	GO:0044093//positive regulation of molecular function;GO:0010604//positive regulation of macromolecule metabolic process;GO:0032885//regulation of polysaccharide biosynthetic process;GO:0065009//regulation of molecular function;GO:0045913//positive regulation of carbohydrate metabolic process;GO:0031323//regulation of cellular metabolic process;GO:0051347//positive regulation of transferase activ…	K09228//KRAB domain-containing zinc finger protein;K18633//mitotic-spindle organizing protein 1;K20720//reticulon-4+ko05010//Alzheimer's disease
80890	0.07	0	-2.80735	1.21853e-05	4.46218e-06	Trim2	GO:1990830//cellular response to leukemia inhibitory factor;GO:0050794//regulation of cellular process;GO:0043067//regulation of programmed cell death;GO:0009987//cellular process;GO:0034097//response to cytokine;GO:0050789//regulation of biological process;GO:1990823//response to leukemia inhibitory factor;GO:0010033//response to organic substance;GO:0071310//cellular response to organic substan…	K11997//tripartite motif-containing protein 2/3;K11997//tripartite motif-containing protein 2/3;K11997//tripartite motif-containing protein 2/3;K11997//tripartite motif-containing protein 2/3;K11997//tripartite motif-containing protein 2/3;K11997//tripartite motif-containing protein 2/3;K11997//tripartite motif-containing protein 2/3;K11997//tripartite motif-containing protein 2/3;K11997//tripart…
93707	0.07	0	-2.80735	0.000222084	9.5347e-05	Pcdhgc4	GO:0071840//cellular component organization or biogenesis;GO:0098609//cell-cell adhesion;GO:0050808//synapse organization;GO:0022610//biological adhesion;GO:0007155//cell adhesion;GO:0016043//cellular component organization;GO:0009987//cellular process;GO:0098742//cell-cell adhesion via plasma-membrane adhesion molecules;GO:0007156//homophilic cell adhesion via plasma membrane adhesion molecules;…	K16497//protocadherin gamma subfamily C
BGI_novel_G000047	0.9	0.13	-2.79141	8.43523e-08	2.52392e-08	BGI_novel_G000047	GO:0022407//regulation of cell-cell adhesion;GO:0019884//antigen processing and presentation of exogenous antigen;GO:1903037//regulation of leukocyte cell-cell adhesion;GO:0045619//regulation of lymphocyte differentiation;GO:0002587//negative regulation of antigen processing and presentation of peptide antigen via MHC class II;GO:0019882//antigen processing and presentation;GO:1903706//regulation…	K06752//major histocompatibility complex, class II+ko05416//Viral myocarditis+ko04145//Phagosome+ko04640//Hematopoietic cell lineage+ko04514//Cell adhesion molecules (CAMs)+ko04658//Th1 and Th2 cell differentiation+ko04659//Th17 cell differentiation+ko05322//Systemic lupus erythematosus+ko04612//Antigen processing and presentation+ko04940//Type I diabetes mellitus+ko05145//Toxoplasmosis+ko05140//…
12332	1.51	0.22	-2.77897	8.44761e-11	2.00068e-11	Capg	GO:0030833//regulation of actin filament polymerization;GO:0110053//regulation of actin filament organization;GO:0043242//negative regulation of protein complex disassembly;GO:0032535//regulation of cellular component size;GO:0048519//negative regulation of biological process;GO:0044087//regulation of cellular component biogenesis;GO:0050794//regulation of cellular process;GO:0032271//regulation …	K10368//capping protein (actin filament), gelsolin-like
100041874	0.34	0.05	-2.76553	9.92964e-05	4.06392e-05	Gm3558
238333	0.68	0.1	-2.76553	1.61655e-08	4.59018e-09	Samd15	GO:1901360//organic cyclic compound metabolic process;GO:0042254//ribosome biogenesis;GO:0044085//cellular component biogenesis;GO:0000027//ribosomal large subunit assembly;GO:0071840//cellular component organization or biogenesis;GO:0046483//heterocycle metabolic process;GO:0006725//cellular aromatic compound metabolic process;GO:0034470//ncRNA processing;GO:0016043//cellular component organizat…	K04574//neurofilament heavy polypeptide+ko05014//Amyotrophic lateral sclerosis (ALS);K04574//neurofilament heavy polypeptide+ko05014//Amyotrophic lateral sclerosis (ALS)
16918	0.2	0.03	-2.73697	0.000178287	7.53518e-05	Mycl	GO:0009987//cellular process;GO:0051960//regulation of nervous system development;GO:0045607//regulation of inner ear auditory receptor cell differentiation;GO:0007275//multicellular organism development;GO:0060284//regulation of cell development;GO:0048731//system development;GO:0050794//regulation of cellular process;GO:0050767//regulation of neurogenesis;GO:0048699//generation of neurons;GO:00…	K09110//L-myc proto-oncogene protein
21841	0.4	0.06	-2.73697	6.61329e-11	1.55415e-11	Tia1	GO:0043067//regulation of programmed cell death;GO:0012501//programmed cell death;GO:0042036//negative regulation of cytokine biosynthetic process;GO:0031326//regulation of cellular biosynthetic process;GO:2000113//negative regulation of cellular macromolecule biosynthetic process;GO:0042981//regulation of apoptotic process;GO:0042035//regulation of cytokine biosynthetic process;GO:0070727//cellu…	K13201//nucleolysin TIA-1/TIAR;K13201//nucleolysin TIA-1/TIAR;K13201//nucleolysin TIA-1/TIAR;K13201//nucleolysin TIA-1/TIAR;K13201//nucleolysin TIA-1/TIAR;K13201//nucleolysin TIA-1/TIAR;K13201//nucleolysin TIA-1/TIAR
74369	0.2	0.03	-2.73697	0.000570582	0.000259722	Mei1	GO:0051179//localization;GO:0030154//cell differentiation;GO:0032501//multicellular organismal process;GO:0007127//meiosis I;GO:0007049//cell cycle;GO:0009987//cellular process;GO:0051234//establishment of localization;GO:0022414//reproductive process;GO:0048856//anatomical structure development;GO:0051321//meiotic cell cycle;GO:0090220//chromosome localization to nuclear envelope involved in hom…
16185	0.78	0.12	-2.70044	2.59681e-17	4.20928e-18	Il2rb	GO:0007165//signal transduction;GO:0048523//negative regulation of cellular process;GO:0007154//cell communication;GO:0071310//cellular response to organic substance;GO:0007166//cell surface receptor signaling pathway;GO:0043069//negative regulation of programmed cell death;GO:0071345//cellular response to cytokine stimulus;GO:0050789//regulation of biological process;GO:0010941//regulation of ce…	K05069//interleukin 2 receptor beta+ko04144//Endocytosis+ko04630//Jak-STAT signaling pathway+ko04658//Th1 and Th2 cell differentiation+ko04659//Th17 cell differentiation+ko05200//Pathways in cancer+ko05202//Transcriptional misregulation in cancer+ko04151//PI3K-Akt signaling pathway+ko04060//Cytokine-cytokine receptor interaction+ko05162//Measles+ko05166//HTLV-I infection
71728	0.13	0.02	-2.70044	0.000981735	0.000463468	Stk11ip	GO:0051179//localization;GO:0033036//macromolecule localization;GO:0008104//protein localization;GO:0016020//membrane;GO:0043227//membrane-bounded organelle;GO:0098852//lytic vacuole membrane;GO:0044444//cytoplasmic part;GO:0005774//vacuolar membrane;GO:0043231//intracellular membrane-bounded organelle;GO:0044422//organelle part;GO:0005622//intracellular;GO:0005737//cytoplasm;GO:0005623//cell;GO:…	K13856//solute carrier family 4 (anion exchanger), member 3
14465	2.59	0.4	-2.69488	3.57351e-27	3.82256e-28	Gata6	GO:0043066//negative regulation of apoptotic process;GO:0051172//negative regulation of nitrogen compound metabolic process;GO:0031016//pancreas development;GO:0032501//multicellular organismal process;GO:0070848//response to growth factor;GO:0009987//cellular process;GO:0035051//cardiocyte differentiation;GO:0080090//regulation of primary metabolic process;GO:0014888//striated muscle adaptation;…	K17897//GATA-binding protein 6;K17897//GATA-binding protein 6
13639	1.14	0.18	-2.66297	2.84765e-10	7.02078e-11	Efna4	GO:0007409//axonogenesis;GO:0048513//animal organ development;GO:0007154//cell communication;GO:0048013//ephrin receptor signaling pathway;GO:0048534//hematopoietic or lymphoid organ development;GO:0006935//chemotaxis;GO:0046849//bone remodeling;GO:0032502//developmental process;GO:0048667//cell morphogenesis involved in neuron differentiation;GO:0048869//cellular developmental process;GO:0009987…	K05462//ephrin-A+ko04360//Axon guidance+ko04151//PI3K-Akt signaling pathway+ko04010//MAPK signaling pathway+ko04014//Ras signaling pathway+ko04015//Rap1 signaling pathway
12908	0.5	0.08	-2.64386	4.34231e-10	1.0851e-10	Crat	GO:0044237//cellular metabolic process;GO:0006631//fatty acid metabolic process;GO:0051234//establishment of localization;GO:0009987//cellular process;GO:0006807//nitrogen compound metabolic process;GO:0043436//oxoacid metabolic process;GO:0008152//metabolic process;GO:0044238//primary metabolic process;GO:0032787//monocarboxylic acid metabolic process;GO:0051179//localization;GO:0006629//lipid m…	K00624//carnitine O-acetyltransferase [EC:2.3.1.7]+ko04146//Peroxisome
16480	0.25	0.04	-2.64386	1.73581e-05	6.47796e-06	Jup	GO:0051049//regulation of transport;GO:0009889//regulation of biosynthetic process;GO:0071681//cellular response to indole-3-methanol;GO:0009628//response to abiotic stimulus;GO:0040011//locomotion;GO:1903506//regulation of nucleic acid-templated transcription;GO:0035637//multicellular organismal signaling;GO:0086004//regulation of cardiac muscle cell contraction;GO:0051223//regulation of protein…	K10056//junction plakoglobin+ko05412//Arrhythmogenic right ventricular cardiomyopathy (ARVC)+ko05226//Gastric cancer+ko05200//Pathways in cancer+ko05202//Transcriptional misregulation in cancer+ko05221//Acute myeloid leukemia
22029	0.56	0.09	-2.63743	2.73616e-08	7.88144e-09	Traf1	GO:0012501//programmed cell death;GO:0010556//regulation of macromolecule biosynthetic process;GO:0023052//signaling;GO:0044093//positive regulation of molecular function;GO:0050789//regulation of biological process;GO:0010646//regulation of cell communication;GO:0006355//regulation of transcription, DNA-templated;GO:0031323//regulation of cellular metabolic process;GO:2001233//regulation of apop…	K03172//TNF receptor-associated factor 1+ko05222//Small cell lung cancer+ko04210//Apoptosis+ko04668//TNF signaling pathway+ko05200//Pathways in cancer+ko05202//Transcriptional misregulation in cancer+ko05203//Viral carcinogenesis+ko04064//NF-kappa B signaling pathway+ko05169//Epstein-Barr virus infection+ko05168//Herpes simplex infection
65970	1.18	0.19	-2.63472	7.63405e-22	1.00632e-22	Lima1	GO:0051129//negative regulation of cellular component organization;GO:0030834//regulation of actin filament depolymerization;GO:0030835//negative regulation of actin filament depolymerization;GO:0030036//actin cytoskeleton organization;GO:0048519//negative regulation of biological process;GO:1901880//negative regulation of protein depolymerization;GO:0043242//negative regulation of protein comple…	K19947//F-actin monooxygenase [EC:1.14.13.225];K19947//F-actin monooxygenase [EC:1.14.13.225]
266645	0.31	0.05	-2.63227	9.93117e-05	4.06392e-05	Acmsd	GO:0050794//regulation of cellular process;GO:0065003//macromolecular complex assembly;GO:0051172//negative regulation of nitrogen compound metabolic process;GO:0071704//organic substance metabolic process;GO:0051259//protein oligomerization;GO:0071840//cellular component organization or biogenesis;GO:0043933//macromolecular complex subunit organization;GO:0009987//cellular process;GO:0016043//ce…	K03392//aminocarboxymuconate-semialdehyde decarboxylase [EC:4.1.1.45]+ko00380//Tryptophan metabolism+ko01100//Metabolic pathways
50912	0.31	0.05	-2.63227	5.3465e-06	1.88029e-06	Exosc10	GO:0006725//cellular aromatic compound metabolic process;GO:0071028//nuclear mRNA surveillance;GO:0071030//nuclear mRNA surveillance of spliceosomal pre-mRNA splicing;GO:0008334//histone mRNA metabolic process;GO:0051641//cellular localization;GO:0008152//metabolic process;GO:0010556//regulation of macromolecule biosynthetic process;GO:0051179//localization;GO:0044265//cellular macromolecule cata…	K12591//exosome complex exonuclease RRP6 [EC:3.1.13.-]+ko03018//RNA degradation
59010	0.37	0.06	-2.62449	0.000560231	0.000254586	Sqrdl	GO:0019418//sulfide oxidation;GO:0009987//cellular process;GO:0008152//metabolic process;GO:0070813//hydrogen sulfide metabolic process;GO:0044237//cellular metabolic process;GO:0070221//sulfide oxidation, using sulfide:quinone oxidoreductase;GO:0009404//toxin metabolic process;GO:0017144//drug metabolic process;GO:0055114//oxidation-reduction process;GO:0019748//secondary metabolic process;GO:00…	K22470//eukaryotic sulfide quinone oxidoreductase [EC:1.8.5.8]+ko00920//Sulfur metabolism
18504	0.49	0.08	-2.61471	2.88122e-08	8.31566e-09	Pax2	GO:0060429//epithelium development;GO:0048729//tissue morphogenesis;GO:0080090//regulation of primary metabolic process;GO:0051253//negative regulation of RNA metabolic process;GO:0001823//mesonephros development;GO:0009891//positive regulation of biosynthetic process;GO:0010629//negative regulation of gene expression;GO:0010604//positive regulation of macromolecule metabolic process;GO:0050789//…	K15608//paired box protein 2;K15608//paired box protein 2
71916	1.16	0.19	-2.61005	4.85706e-09	1.31972e-09	Dus4l	GO:0140098//catalytic activity, acting on RNA;GO:0043168//anion binding;GO:0017150//tRNA dihydrouridine synthase activity;GO:0016491//oxidoreductase activity;GO:0050662//coenzyme binding;GO:0005488//binding;GO:0036094//small molecule binding;GO:1901363//heterocyclic compound binding;GO:1901265//nucleoside phosphate binding;GO:0003824//catalytic activity;GO:0000166//nucleotide binding;GO:0048037//…	K05545//tRNA-dihydrouridine synthase 4 [EC:1.3.1.90];K05545//tRNA-dihydrouridine synthase 4 [EC:1.3.1.90];K05545//tRNA-dihydrouridine synthase 4 [EC:1.3.1.90];K05545//tRNA-dihydrouridine synthase 4 [EC:1.3.1.90];K05545//tRNA-dihydrouridine synthase 4 [EC:1.3.1.90];K05545//tRNA-dihydrouridine synthase 4 [EC:1.3.1.90]
268759	0.91	0.15	-2.6009	1.58977e-10	3.84332e-11	9930012K11Rik
102640043	0.78	0.13	-2.58496	2.82939e-09	7.50578e-10	Gm36210
103466	0.06	0	-2.58496	0.000221921	9.5347e-05	Nt5dc3	GO:0043226//organelle;GO:0005739//mitochondrion;GO:0005737//cytoplasm;GO:0043231//intracellular membrane-bounded organelle;GO:0032991//macromolecular complex;GO:0044424//intracellular part;GO:0044444//cytoplasmic part;GO:0043227//membrane-bounded organelle;GO:0005623//cell;GO:0043229//intracellular organelle;GO:0005622//intracellular;GO:0005829//cytosol;GO:0044464//cell part;GO:0043235//receptor …	K01081//5'-nucleotidase [EC:3.1.3.5]+ko00230//Purine metabolism+ko00240//Pyrimidine metabolism+ko00760//Nicotinate and nicotinamide metabolism+ko01100//Metabolic pathways
114249	0.24	0.04	-2.58496	9.39604e-07	3.06564e-07	Npnt	GO:0051240//positive regulation of multicellular organismal process;GO:0070887//cellular response to chemical stimulus;GO:0051254//positive regulation of RNA metabolic process;GO:0010692//regulation of alkaline phosphatase activity;GO:0010811//positive regulation of cell-substrate adhesion;GO:0061138//morphogenesis of a branching epithelium;GO:0034612//response to tumor necrosis factor;GO:0045667…	K06824//nephronectin
12563	0.06	0	-2.58496	1.21895e-05	4.46218e-06	Cdh6	GO:0007154//cell communication;GO:0009987//cellular process;GO:0034330//cell junction organization;GO:0007219//Notch signaling pathway;GO:0007166//cell surface receptor signaling pathway;GO:0007156//homophilic cell adhesion via plasma membrane adhesion molecules;GO:0022610//biological adhesion;GO:0007155//cell adhesion;GO:0016043//cellular component organization;GO:0034332//adherens junction orga…	K06798//cadherin 6, type 2, K-cadherin;K06798//cadherin 6, type 2, K-cadherin;K06798//cadherin 6, type 2, K-cadherin;K06798//cadherin 6, type 2, K-cadherin
14412	0.6	0.1	-2.58496	9.78129e-05	4.00012e-05	Slc6a13	GO:0006810//transport;GO:0051234//establishment of localization;GO:0051179//localization;GO:0005886//plasma membrane;GO:0031982//vesicle;GO:0005623//cell;GO:0031226//intrinsic component of plasma membrane;GO:0016020//membrane;GO:0043227//membrane-bounded organelle;GO:0031224//intrinsic component of membrane;GO:1903561//extracellular vesicle;GO:0005615//extracellular space;GO:0005576//extracellula…	K05039//solute carrier family 6 (neurotransmitter transporter, GABA) member 6/8/11/12/13
14807	0.06	0	-2.58496	2.81704e-06	9.65308e-07	Grik3	GO:0065007//biological regulation;GO:0007268//chemical synaptic transmission;GO:0051966//regulation of synaptic transmission, glutamatergic;GO:0050804//modulation of chemical synaptic transmission;GO:0050789//regulation of biological process;GO:0023052//signaling;GO:0042391//regulation of membrane potential;GO:0007166//cell surface receptor signaling pathway;GO:0009987//cellular process;GO:009917…	K05203//glutamate receptor, ionotropic kainate 3+ko04724//Glutamatergic synapse+ko04080//Neuroactive ligand-receptor interaction
16367	0.06	0	-2.58496	1.35592e-06	4.4898e-07	Irs1	GO:0010565//regulation of cellular ketone metabolic process;GO:0043085//positive regulation of catalytic activity;GO:0009725//response to hormone;GO:0050796//regulation of insulin secretion;GO:0032870//cellular response to hormone stimulus;GO:1903532//positive regulation of secretion by cell;GO:0008284//positive regulation of cell proliferation;GO:1903727//positive regulation of phospholipid meta…	K16172//insulin receptor substrate 1+ko04022//cGMP-PKG signaling pathway+ko04140//Autophagy - animal+ko04211//Longevity regulating pathway+ko04212//Longevity regulating pathway - worm+ko04213//Longevity regulating pathway - multiple species+ko04910//Insulin signaling pathway+ko04722//Neurotrophin signaling pathway+ko05206//MicroRNAs in cancer+ko04931//Insulin resistance+ko04930//Type II diabetes …
16440	0.06	0	-2.58496	1.35566e-06	4.4898e-07	Itpr3	GO:0051480//regulation of cytosolic calcium ion concentration;GO:0010035//response to inorganic substance;GO:0050794//regulation of cellular process;GO:0072511//divalent inorganic cation transport;GO:0055065//metal ion homeostasis;GO:0010646//regulation of cell communication;GO:0099177//regulation of trans-synaptic signaling;GO:0048878//chemical homeostasis;GO:0042592//homeostatic process;GO:0010…	K04960//inositol 1,4,5-triphosphate receptor type 3+ko04022//cGMP-PKG signaling pathway+ko04020//Calcium signaling pathway+ko04730//Long-term depression+ko04210//Apoptosis+ko04218//Cellular senescence+ko04070//Phosphatidylinositol signaling system+ko04918//Thyroid hormone synthesis+ko04915//Estrogen signaling pathway+ko04912//GnRH signaling pathway+ko04911//Insulin secretion+ko04728//Dopaminergic…
17754	0.06	0	-2.58496	1.47896e-07	4.51758e-08	Map1a	GO:0007600//sensory perception;GO:0000226//microtubule cytoskeleton organization;GO:0045494//photoreceptor cell maintenance;GO:0060249//anatomical structure homeostasis;GO:0001895//retina homeostasis;GO:0016043//cellular component organization;GO:0042592//homeostatic process;GO:0050954//sensory perception of mechanical stimulus;GO:0009987//cellular process;GO:0001894//tissue homeostasis;GO:003250…	K10429//microtubule-associated protein 1;K10429//microtubule-associated protein 1
241639	0.12	0.02	-2.58496	5.10253e-05	2.0069e-05	Fermt1	GO:0060828//regulation of canonical Wnt signaling pathway;GO:0071711//basement membrane organization;GO:0010810//regulation of cell-substrate adhesion;GO:0048519//negative regulation of biological process;GO:0051239//regulation of multicellular organismal process;GO:0030155//regulation of cell adhesion;GO:1903828//negative regulation of cellular protein localization;GO:0001667//ameboidal-type cel…	K17082//kindlin 1;K17082//kindlin 1;K17082//kindlin 1;K17082//kindlin 1
545370	0.06	0	-2.58496	4.62497e-12	1.00171e-12	Hmcn1	GO:0007049//cell cycle;GO:0009987//cellular process;GO:0051301//cell division;GO:0005623//cell;GO:0009986//cell surface;GO:0032154//cleavage furrow;GO:0044464//cell part;GO:0071944//cell periphery;GO:0097610//cell surface furrow;GO:0005737//cytoplasm;GO:0005578//proteinaceous extracellular matrix;GO:0044444//cytoplasmic part;GO:0005604//basement membrane;GO:0005615//extracellular space;GO:0099568…	K17341//hemicentin;K17341//hemicentin;K17341//hemicentin
60596	0.06	0	-2.58496	0.000937487	0.000440746	Gucy1a3	GO:0050794//regulation of cellular process;GO:0007154//cell communication;GO:0030826//regulation of cGMP biosynthetic process;GO:0035150//regulation of tube size;GO:1901566//organonitrogen compound biosynthetic process;GO:0006937//regulation of muscle contraction;GO:0046068//cGMP metabolic process;GO:0007165//signal transduction;GO:0006807//nitrogen compound metabolic process;GO:0044403//symbiosi…	K12318//guanylate cyclase soluble subunit alpha [EC:4.6.1.2]+ko04022//cGMP-PKG signaling pathway+ko04730//Long-term depression+ko00230//Purine metabolism+ko04611//Platelet activation+ko04713//Circadian entrainment+ko04540//Gap junction+ko04970//Salivary secretion+ko04270//Vascular smooth muscle contraction+ko04921//Oxytocin signaling pathway+ko04924//Renin secretion
73430	0.12	0.02	-2.58496	0.000172815	7.2952e-05	1700049G17Rik	GO:0031323//regulation of cellular metabolic process;GO:0019222//regulation of metabolic process;GO:0051171//regulation of nitrogen compound metabolic process;GO:0019219//regulation of nucleobase-containing compound metabolic process;GO:0010468//regulation of gene expression;GO:2000112//regulation of cellular macromolecule biosynthetic process;GO:0065007//biological regulation;GO:0051252//regulat…	K09228//KRAB domain-containing zinc finger protein
20589	0.89	0.15	-2.56884	2.60363e-18	4.03148e-19	Ighmbp2	GO:0071840//cellular component organization or biogenesis;GO:0070271//protein complex biogenesis;GO:0051260//protein homooligomerization;GO:0022607//cellular component assembly;GO:0043933//macromolecular complex subunit organization;GO:0065003//macromolecular complex assembly;GO:0044085//cellular component biogenesis;GO:0009987//cellular process;GO:0016043//cellular component organization;GO:0051…	K19036//ATP-dependent RNA/DNA helicase IGHMBP2 [EC:3.6.4.12 3.6.4.13]
216177	0.23	0.04	-2.52356	0.000560075	0.000254586	AU041133	GO:0006355//regulation of transcription, DNA-templated;GO:0051252//regulation of RNA metabolic process;GO:2001141//regulation of RNA biosynthetic process;GO:0050789//regulation of biological process;GO:0060255//regulation of macromolecule metabolic process;GO:0050794//regulation of cellular process;GO:0051171//regulation of nitrogen compound metabolic process;GO:1903506//regulation of nucleic aci…	K09228//KRAB domain-containing zinc finger protein
240058	0.23	0.04	-2.52356	4.1394e-06	1.4435e-06	Cpne5	GO:0009987//cellular process;GO:0051128//regulation of cellular component organization;GO:2000026//regulation of multicellular organismal development;GO:0065007//biological regulation;GO:0045927//positive regulation of growth;GO:0007275//multicellular organism development;GO:0010976//positive regulation of neuron projection development;GO:0045595//regulation of cell differentiation;GO:0048856//an…	K20493//leucine-rich repeat-containing protein 16;K11348//bromodomain and PHD finger-containing protein 1;K16280//E3 ubiquitin-protein ligase RGLG [EC:2.3.2.27]
68075	0.46	0.08	-2.52356	0.000317208	0.000138927	Lurap1	GO:0001819//positive regulation of cytokine production;GO:0043123//positive regulation of I-kappaB kinase/NF-kappaB signaling;GO:0051674//localization of cell;GO:0010646//regulation of cell communication;GO:0006996//organelle organization;GO:0031032//actomyosin structure organization;GO:0048870//cell motility;GO:0001817//regulation of cytokine production;GO:0016477//cell migration;GO:0023051//reg…	K10875//DNA repair and recombination protein RAD54 and RAD54-like protein [EC:3.6.4.-]+ko03440//Homologous recombination
320802	1.78	0.31	-2.52154	4.88842e-13	9.99884e-14	Ifitm10	GO:0009607//response to biotic stimulus;GO:0050896//response to stimulus;GO:0005623//cell;GO:0016021//integral component of membrane;GO:0071944//cell periphery;GO:0044425//membrane part;GO:0031224//intrinsic component of membrane;GO:0005886//plasma membrane;GO:0044464//cell part;GO:0016020//membrane;	K06566//interferon induced transmembrane protein
104816	0.4	0.07	-2.51457	9.73201e-06	3.51224e-06	Aspg	GO:0006807//nitrogen compound metabolic process;GO:0071704//organic substance metabolic process;GO:0016042//lipid catabolic process;GO:0009065//glutamine family amino acid catabolic process;GO:0009987//cellular process;GO:0046395//carboxylic acid catabolic process;GO:0044238//primary metabolic process;GO:0006629//lipid metabolic process;GO:1901575//organic substance catabolic process;GO:1901605//…	K13278//60kDa lysophospholipase [EC:3.1.1.5 3.1.1.47 3.5.1.1];K13278//60kDa lysophospholipase [EC:3.1.1.5 3.1.1.47 3.5.1.1];K13278//60kDa lysophospholipase [EC:3.1.1.5 3.1.1.47 3.5.1.1];K13278//60kDa lysophospholipase [EC:3.1.1.5 3.1.1.47 3.5.1.1]
17874	3.08	0.54	-2.5119	2.24551e-30	2.15416e-31	Myd88	GO:0042107//cytokine metabolic process;GO:0042108//positive regulation of cytokine biosynthetic process;GO:0051403//stress-activated MAPK cascade;GO:0044126//regulation of growth of symbiont in host;GO:0070555//response to interleukin-1;GO:0002682//regulation of immune system process;GO:0043170//macromolecule metabolic process;GO:0031401//positive regulation of protein modification process;GO:003…	K04729//myeloid differentiation primary response protein MyD88+ko05134//Legionellosis+ko05132//Salmonella infection+ko05133//Pertussis+ko05145//Toxoplasmosis+ko05144//Malaria+ko05143//African trypanosomiasis+ko05142//Chagas disease (American trypanosomiasis)+ko05140//Leishmaniasis+ko04621//NOD-like receptor signaling pathway+ko04620//Toll-like receptor signaling pathway+ko04624//Toll and Imd sign…
227327	1.71	0.3	-2.51096	2.46058e-23	3.06816e-24	B3gnt7	GO:0044260//cellular macromolecule metabolic process;GO:1901564//organonitrogen compound metabolic process;GO:1901566//organonitrogen compound biosynthetic process;GO:0044237//cellular metabolic process;GO:1901137//carbohydrate derivative biosynthetic process;GO:0008152//metabolic process;GO:0043170//macromolecule metabolic process;GO:0044238//primary metabolic process;GO:0009101//glycoprotein bi…	K09664//beta-1,3-N-acetylglucosaminyltransferase 7 [EC:2.4.1.-]+ko00533//Glycosaminoglycan biosynthesis - keratan sulfate
446101	1.99	0.35	-2.50734	1.30581e-25	1.48164e-26	Xrra1	GO:0009314//response to radiation;GO:0009628//response to abiotic stimulus;GO:0010165//response to X-ray;GO:0050896//response to stimulus;GO:0010212//response to ionizing radiation;GO:0043231//intracellular membrane-bounded organelle;GO:0044428//nuclear part;GO:0043229//intracellular organelle;GO:0044464//cell part;GO:0043227//membrane-bounded organelle;GO:0043226//organelle;GO:0005622//intracell…
238317	0.34	0.06	-2.5025	1.49436e-12	3.15366e-13	Elmsan1	GO:0080090//regulation of primary metabolic process;GO:2000112//regulation of cellular macromolecule biosynthetic process;GO:0050789//regulation of biological process;GO:0060255//regulation of macromolecule metabolic process;GO:0006357//regulation of transcription from RNA polymerase II promoter;GO:1903506//regulation of nucleic acid-templated transcription;GO:0051171//regulation of nitrogen comp…	K11584//serine/threonine-protein phosphatase 2A regulatory subunit B'+ko04071//Sphingolipid signaling pathway+ko04728//Dopaminergic synapse+ko04261//Adrenergic signaling in cardiomyocytes+ko03015//mRNA surveillance pathway+ko04152//AMPK signaling pathway+ko04151//PI3K-Akt signaling pathway+ko04114//Oocyte meiosis+ko05165//Human papillomavirus infection;K06065//nuclear receptor co-repressor 2+ko04…
11479	0.45	0.08	-2.49185	2.87077e-08	8.28188e-09	Acvr1b	GO:0007166//cell surface receptor signaling pathway;GO:0046777//protein autophosphorylation;GO:0051254//positive regulation of RNA metabolic process;GO:0048584//positive regulation of response to stimulus;GO:0046660//female sex differentiation;GO:0045935//positive regulation of nucleobase-containing compound metabolic process;GO:0018193//peptidyl-amino acid modification;GO:1903708//positive regul…	K13567//activin receptor type-1B [EC:2.7.11.30]+ko04350//TGF-beta signaling pathway+ko04550//Signaling pathways regulating pluripotency of stem cells+ko04060//Cytokine-cytokine receptor interaction
94218	0.28	0.05	-2.48543	9.35712e-07	3.05176e-07	Cnnm3	GO:0051179//localization;GO:0051234//establishment of localization;GO:0006811//ion transport;GO:0006810//transport;GO:0044464//cell part;GO:0071944//cell periphery;GO:0016020//membrane;GO:0005886//plasma membrane;GO:0005623//cell;GO:0044425//membrane part;GO:0031224//intrinsic component of membrane;GO:0016021//integral component of membrane;	K16302//metal transporter CNNM;K16302//metal transporter CNNM
74088	0.67	0.12	-2.48113	8.32831e-05	3.3828e-05	Them7	GO:0043231//intracellular membrane-bounded organelle;GO:0043229//intracellular organelle;GO:0044444//cytoplasmic part;GO:0005622//intracellular;GO:0044464//cell part;GO:0005737//cytoplasm;GO:0005623//cell;GO:0043227//membrane-bounded organelle;GO:0005739//mitochondrion;GO:0043226//organelle;GO:0044424//intracellular part;
BGI_novel_G000066	5.81	1.05	-2.46815	6.86548e-65	2.81894e-66	BGI_novel_G000066	GO:0005515//protein binding;GO:0042802//identical protein binding;GO:0005488//binding;	K12015//tripartite motif-containing protein 39 [EC:2.3.2.27];K17561//coiled-coil domain-containing protein 8;K02183//calmodulin+ko04024//cAMP signaling pathway+ko04022//cGMP-PKG signaling pathway+ko04020//Calcium signaling pathway+ko05133//Pertussis+ko04218//Cellular senescence+ko04070//Phosphatidylinositol signaling system+ko04916//Melanogenesis+ko04915//Estrogen signaling pathway+ko04912//GnRH …
27368	0.11	0.02	-2.45943	5.10172e-05	2.0069e-05	Tbl2	GO:0050896//response to stimulus;GO:0023052//signaling;GO:0006950//response to stress;GO:0009987//cellular process;GO:0071453//cellular response to oxygen levels;GO:0071456//cellular response to hypoxia;GO:0007154//cell communication;GO:0065007//biological regulation;GO:0035967//cellular response to topologically incorrect protein;GO:0042594//response to starvation;GO:0071310//cellular response t…	K09113//MAX-like protein X+ko04931//Insulin resistance+ko04932//Non-alcoholic fatty liver disease (NAFLD);K13917//mRNA-capping enzyme [EC:2.7.7.50 3.6.1.-]+ko03015//mRNA surveillance pathway
574405	0.22	0.04	-2.45943	0.000560153	0.000254586	DXBay18
57810	0.11	0.02	-2.45943	0.000158982	6.67814e-05	Cdon	GO:0051174//regulation of phosphorus metabolic process;GO:0009887//animal organ morphogenesis;GO:0010171//body morphogenesis;GO:0060255//regulation of macromolecule metabolic process;GO:0010646//regulation of cell communication;GO:0048518//positive regulation of biological process;GO:0007275//multicellular organism development;GO:0042325//regulation of phosphorylation;GO:0019219//regulation of nu…	K20033//cell adhesion molecule-related/down-regulated by oncogenes+ko04340//Hedgehog signaling pathway
98741	0.11	0.02	-2.45943	4.87608e-05	1.91537e-05	Kcnb2	GO:0006812//cation transport;GO:0006813//potassium ion transport;GO:0055085//transmembrane transport;GO:0051259//protein oligomerization;GO:0051234//establishment of localization;GO:0072659//protein localization to plasma membrane;GO:0043933//macromolecular complex subunit organization;GO:0098662//inorganic cation transmembrane transport;GO:0098660//inorganic ion transmembrane transport;GO:005117…	K04886//potassium voltage-gated channel Shab-related subfamily B member 2;K04886//potassium voltage-gated channel Shab-related subfamily B member 2
BGI_novel_G000589	0.88	0.16	-2.45943	5.32212e-06	1.87139e-06	BGI_novel_G000589
101700	0.6	0.11	-2.44746	8.90695e-08	2.67068e-08	Trim68	GO:0051865//protein autoubiquitination;GO:0065007//biological regulation;GO:0009987//cellular process;GO:0044260//cellular macromolecule metabolic process;GO:0010646//regulation of cell communication;GO:0016567//protein ubiquitination;GO:0019538//protein metabolic process;GO:0044267//cellular protein metabolic process;GO:0050794//regulation of cellular process;GO:0008152//metabolic process;GO:003…	K12033//tripartite motif-containing protein 68 [EC:2.3.2.27]
100862375	0.87	0.16	-2.44294	4.85549e-14	9.3098e-15	Gm21685	GO:0009116//nucleoside metabolic process;GO:0046133//pyrimidine ribonucleoside catabolic process;GO:0009185//ribonucleoside diphosphate metabolic process;GO:0046700//heterocycle catabolic process;GO:0019693//ribose phosphate metabolic process;GO:0019439//aromatic compound catabolic process;GO:0009056//catabolic process;GO:0046131//pyrimidine ribonucleoside metabolic process;GO:0009119//ribonucleo…	K12305//ectonucleoside triphosphate diphosphohydrolase 4 [EC:3.6.1.6]+ko04142//Lysosome+ko00230//Purine metabolism+ko00240//Pyrimidine metabolism
107351	0.38	0.07	-2.44057	2.79678e-10	6.88302e-11	Kank1	GO:0090087//regulation of peptide transport;GO:0048583//regulation of response to stimulus;GO:0030334//regulation of cell migration;GO:0043254//regulation of protein complex assembly;GO:0016043//cellular component organization;GO:2000392//regulation of lamellipodium morphogenesis;GO:0032272//negative regulation of protein polymerization;GO:0046824//positive regulation of nucleocytoplasmic transpo…	K22808//KN motif and ankyrin repeat domain-containing protein;K22808//KN motif and ankyrin repeat domain-containing protein
16529	0.27	0.05	-2.43296	2.81768e-05	1.07873e-05	Kcnk5	GO:0006810//transport;GO:0071804//cellular potassium ion transport;GO:0042391//regulation of membrane potential;GO:0051234//establishment of localization;GO:0006812//cation transport;GO:0030322//stabilization of membrane potential;GO:0065008//regulation of biological quality;GO:0006811//ion transport;GO:0065007//biological regulation;GO:0051179//localization;GO:0009987//cellular process;GO:001567…	K04916//potassium channel subfamily K member 5+ko04974//Protein digestion and absorption+ko04742//Taste transduction
68614	0.27	0.05	-2.43296	0.000178314	7.53518e-05	Letmd1	GO:0065008//regulation of biological quality;GO:0006875//cellular metal ion homeostasis;GO:0098771//inorganic ion homeostasis;GO:0030003//cellular cation homeostasis;GO:0048878//chemical homeostasis;GO:0055065//metal ion homeostasis;GO:0006873//cellular ion homeostasis;GO:0065007//biological regulation;GO:0055080//cation homeostasis;GO:0050801//ion homeostasis;GO:0009987//cellular process;GO:0019…	K17800//LETM1 and EF-hand domain-containing protein 1, mitochondrial
100042776	0.75	0.14	-2.42146	0.000300137	0.000131053	Gm4027	GO:0097159//organic cyclic compound binding;GO:0003743//translation initiation factor activity;GO:0003676//nucleic acid binding;GO:1901363//heterocyclic compound binding;GO:0008135//translation factor activity, RNA binding;GO:0005488//binding;GO:0003723//RNA binding;	K03236//translation initiation factor 1A+ko03013//RNA transport
13384	0.75	0.14	-2.42146	1.54868e-11	3.47538e-12	Mpp3	GO:0003824//catalytic activity;GO:0016740//transferase activity;GO:0016772//transferase activity, transferring phosphorus-containing groups;GO:0016301//kinase activity;GO:0019904//protein domain specific binding;GO:0005488//binding;GO:0030165//PDZ domain binding;GO:0005515//protein binding;	K21109//MAGUK p55 subfamily member 4+ko04530//Tight junction
268567	1.17	0.22	-2.41093	7.06981e-22	9.2971e-23	Tmem229b	GO:0016021//integral component of membrane;GO:0044425//membrane part;GO:0016020//membrane;GO:0031224//intrinsic component of membrane;	K19941//synapsin
97031	3.22	0.61	-2.40018	2.66304e-44	1.70314e-45	Tprn	GO:0032501//multicellular organismal process;GO:0050877//nervous system process;GO:0007600//sensory perception;GO:0050954//sensory perception of mechanical stimulus;GO:0003008//system process;GO:0007605//sensory perception of sound;GO:0044464//cell part;GO:0098858//actin-based cell projection;GO:0097458//neuron part;GO:0032421//stereocilium bundle;GO:0043005//neuron projection;GO:0032420//stereoc…	K17559//phostensin;K03006//DNA-directed RNA polymerase II subunit RPB1 [EC:2.7.7.6]+ko00230//Purine metabolism+ko03020//RNA polymerase+ko00240//Pyrimidine metabolism+ko05016//Huntington's disease+ko01100//Metabolic pathways+ko05169//Epstein-Barr virus infection+ko05168//Herpes simplex infection
100045778	0.21	0.04	-2.39232	4.36343e-05	1.70739e-05	Rnf223	GO:0031224//intrinsic component of membrane;GO:0044425//membrane part;GO:0016021//integral component of membrane;GO:0016020//membrane;	K02156//aubergine+ko04320//Dorso-ventral axis formation;K22157//E3 ubiquitin-protein ligase RNF183 [EC:2.3.2.31]
208144	0.42	0.08	-2.39232	7.71474e-08	2.30396e-08	Dhx37	GO:0043170//macromolecule metabolic process;GO:0008152//metabolic process;GO:0016070//RNA metabolic process;GO:0010467//gene expression;GO:0034641//cellular nitrogen compound metabolic process;GO:0006396//RNA processing;GO:1901360//organic cyclic compound metabolic process;GO:0006725//cellular aromatic compound metabolic process;GO:0006807//nitrogen compound metabolic process;GO:0046483//heterocy…	K14780//ATP-dependent RNA helicase DHX37/DHR1 [EC:3.6.4.13];K14780//ATP-dependent RNA helicase DHX37/DHR1 [EC:3.6.4.13];K14780//ATP-dependent RNA helicase DHX37/DHR1 [EC:3.6.4.13]
20397	0.52	0.1	-2.37851	7.8548e-11	1.85483e-11	Sgpl1	GO:0002376//immune system process;GO:0051179//localization;GO:0007166//cell surface receptor signaling pathway;GO:0071704//organic substance metabolic process;GO:0044238//primary metabolic process;GO:0003006//developmental process involved in reproduction;GO:0009653//anatomical structure morphogenesis;GO:0032502//developmental process;GO:0022602//ovulation cycle process;GO:0010761//fibroblast mig…	K01634//sphinganine-1-phosphate aldolase [EC:4.1.2.27]+ko04071//Sphingolipid signaling pathway+ko00600//Sphingolipid metabolism+ko01100//Metabolic pathways
26968	0.26	0.05	-2.37851	0.000981604	0.000463468	Islr	GO:0022610//biological adhesion;GO:0007155//cell adhesion;GO:0070062//extracellular exosome;GO:0043226//organelle;GO:0031982//vesicle;GO:0044421//extracellular region part;GO:0005615//extracellular space;GO:0043230//extracellular organelle;GO:0043227//membrane-bounded organelle;GO:0005576//extracellular region;GO:1903561//extracellular vesicle;	K16357//leucine-rich repeat and fibronectin type-III domain-containing protein 4;K19511//peroxidase [EC:1.11.1.7];K06839//slit 2+ko04360//Axon guidance
80721	1.6	0.31	-2.36773	2.29862e-24	2.74588e-25	Slc19a3	GO:0051180//vitamin transport;GO:0045117//azole transport;GO:0051234//establishment of localization;GO:0071702//organic substance transport;GO:0042493//response to drug;GO:0042221//response to chemical;GO:0051179//localization;GO:0006810//transport;GO:0015888//thiamine transport;GO:0050896//response to stimulus;GO:0071705//nitrogen compound transport;GO:0072348//sulfur compound transport;GO:00158…	K14610//solute carrier family 19 (thiamine transporter), member 2/3+ko04977//Vitamin digestion and absorption;K14610//solute carrier family 19 (thiamine transporter), member 2/3+ko04977//Vitamin digestion and absorption
12331	1.96	0.38	-2.36678	2.06744e-26	2.27542e-27	Cap1	GO:0048870//cell motility;GO:0019219//regulation of nucleobase-containing compound metabolic process;GO:0007015//actin filament organization;GO:0008154//actin polymerization or depolymerization;GO:0051174//regulation of phosphorus metabolic process;GO:0080090//regulation of primary metabolic process;GO:0051171//regulation of nitrogen compound metabolic process;GO:0001667//ameboidal-type cell migr…	K17261//adenylyl cyclase-associated protein
13368	1.44	0.28	-2.36257	6.9149e-14	1.33675e-14	Dffb	GO:1901360//organic cyclic compound metabolic process;GO:0043933//macromolecular complex subunit organization;GO:0046483//heterocycle metabolic process;GO:0044265//cellular macromolecule catabolic process;GO:0006915//apoptotic process;GO:0006259//DNA metabolic process;GO:0022607//cellular component assembly;GO:0030261//chromosome condensation;GO:0019439//aromatic compound catabolic process;GO:003…	K02311//DNA fragmentation factor, 40 kD, beta subunit [EC:3.-.-.-]+ko04210//Apoptosis;K02311//DNA fragmentation factor, 40 kD, beta subunit [EC:3.-.-.-]+ko04210//Apoptosis;K02311//DNA fragmentation factor, 40 kD, beta subunit [EC:3.-.-.-]+ko04210//Apoptosis
224656	1.28	0.25	-2.35614	7.44131e-18	1.17709e-18	Zfp523	GO:0006355//regulation of transcription, DNA-templated;GO:1903508//positive regulation of nucleic acid-templated transcription;GO:0006357//regulation of transcription from RNA polymerase II promoter;GO:0009891//positive regulation of biosynthetic process;GO:1902680//positive regulation of RNA biosynthetic process;GO:0010628//positive regulation of gene expression;GO:2001141//regulation of RNA bio…	K20828//zinc finger protein 143/76
105246618	2.04	0.4	-2.3505	9.76194e-20	1.40441e-20	Gm41885		K01679//fumarate hydratase, class II [EC:4.2.1.2]+ko01200//Carbon metabolism+ko05211//Renal cell carcinoma+ko00020//Citrate cycle (TCA cycle)+ko05200//Pathways in cancer+ko04934//Cushing's syndrome+ko00620//Pyruvate metabolism+ko01100//Metabolic pathways;K10279//F-box and leucine-rich repeat protein 13;K22020//mucin-19;K12488//Arf-GAP with SH3 domain, ANK repeat and PH domain-containing protein+k…
101568	7.31	1.44	-2.3438	3.26832e-59	1.53161e-60	Vrk3	GO:0080090//regulation of primary metabolic process;GO:0006468//protein phosphorylation;GO:0016310//phosphorylation;GO:0070373//negative regulation of ERK1 and ERK2 cascade;GO:0051248//negative regulation of protein metabolic process;GO:0044260//cellular macromolecule metabolic process;GO:0042325//regulation of phosphorylation;GO:0010605//negative regulation of macromolecule metabolic process;GO:…	K08816//vaccinia related kinase [EC:2.7.11.1]
12217	0.05	0.01	-2.32193	0.000208745	8.88566e-05	Bsn	GO:0050794//regulation of cellular process;GO:0065007//biological regulation;GO:0050789//regulation of biological process;GO:0032502//developmental process;GO:0022607//cellular component assembly;GO:0051179//localization;GO:0033036//macromolecule localization;GO:0008104//protein localization;GO:0032501//multicellular organismal process;GO:0048856//anatomical structure development;GO:0007165//sign…	K16882//protein piccolo+ko04911//Insulin secretion
12842	0.05	0	-2.32193	0.000940768	0.000440746	Col1a1	GO:0032355//response to estradiol;GO:0050877//nervous system process;GO:0001568//blood vessel development;GO:0003008//system process;GO:0048523//negative regulation of cellular process;GO:0007169//transmembrane receptor protein tyrosine kinase signaling pathway;GO:0031960//response to corticosteroid;GO:0015031//protein transport;GO:0008104//protein localization;GO:0009967//positive regulation of …	K06236//collagen, type I, alpha+ko04512//ECM-receptor interaction+ko04510//Focal adhesion+ko04933//AGE-RAGE signaling pathway in diabetic complications+ko04611//Platelet activation+ko05146//Amoebiasis+ko04974//Protein digestion and absorption+ko04151//PI3K-Akt signaling pathway+ko04926//Relaxin signaling pathway+ko05165//Human papillomavirus infection;K06236//collagen, type I, alpha+ko04512//ECM-…
16565	0.2	0.04	-2.32193	1.42344e-09	3.689e-10	Kif21b	GO:0009987//cellular process;GO:0007017//microtubule-based process;GO:0007018//microtubule-based movement;GO:0006928//movement of cell or subcellular component;GO:0099513//polymeric cytoskeletal fiber;GO:0030424//axon;GO:0120025//plasma membrane bounded cell projection;GO:0043005//neuron projection;GO:0005856//cytoskeleton;GO:0044422//organelle part;GO:0097458//neuron part;GO:0120038//plasma memb…	K10395//kinesin family member 4/21/27
20563	0.05	0	-2.32193	5.22086e-05	2.06266e-05	Slit2	GO:0120033//negative regulation of plasma membrane bounded cell projection assembly;GO:0071504//cellular response to heparin;GO:0090132//epithelium migration;GO:0032502//developmental process;GO:0021955//central nervous system neuron axonogenesis;GO:0010632//regulation of epithelial cell migration;GO:0048856//anatomical structure development;GO:0008406//gonad development;GO:0030517//negative regu…	K06839//slit 2+ko04360//Axon guidance
211612	0.05	0	-2.32193	0.000456431	0.000204998	Ptchd1	GO:0032501//multicellular organismal process;GO:0050890//cognition;GO:0021536//diencephalon development;GO:0048731//system development;GO:0007399//nervous system development;GO:0051704//multi-organism process;GO:0007610//behavior;GO:0050877//nervous system process;GO:0021794//thalamus development;GO:0007165//signal transduction;GO:0051716//cellular response to stimulus;GO:0003008//system process;…	K06225//patched 1+ko04360//Axon guidance+ko04024//cAMP signaling pathway+ko05217//Basal cell carcinoma+ko04341//Hedgehog signaling pathway - fly+ko04340//Hedgehog signaling pathway+ko05200//Pathways in cancer+ko05205//Proteoglycans in cancer;K11101//patched 2+ko05217//Basal cell carcinoma+ko04340//Hedgehog signaling pathway+ko05200//Pathways in cancer
216766	0.85	0.17	-2.32193	9.84899e-26	1.11255e-26	Gemin5	GO:0019538//protein metabolic process;GO:0043604//amide biosynthetic process;GO:0006518//peptide metabolic process;GO:0000375//RNA splicing, via transesterification reactions;GO:0016070//RNA metabolic process;GO:0006807//nitrogen compound metabolic process;GO:0010556//regulation of macromolecule biosynthetic process;GO:0071840//cellular component organization or biogenesis;GO:0034645//cellular ma…	K13133//gem associated protein 5+ko03013//RNA transport
218544	0.75	0.15	-2.32193	4.05651e-10	1.01163e-10	Sgtb	GO:0006457//protein folding;GO:0009987//cellular process;GO:0042802//identical protein binding;GO:0051087//chaperone binding;GO:0031072//heat shock protein binding;GO:0046983//protein dimerization activity;GO:0005515//protein binding;GO:0046982//protein heterodimerization activity;GO:0042803//protein homodimerization activity;GO:0030544//Hsp70 protein binding;GO:0008022//protein C-terminus bindin…	K16365//small glutamine-rich tetratricopeptide repeat-containing protein alpha
243923	0.05	0	-2.32193	0.000222575	9.5347e-05	Rgs9bp	GO:0007600//sensory perception;GO:0032501//multicellular organismal process;GO:0023051//regulation of signaling;GO:0009628//response to abiotic stimulus;GO:0009416//response to light stimulus;GO:0050908//detection of light stimulus involved in visual perception;GO:0009582//detection of abiotic stimulus;GO:0048585//negative regulation of response to stimulus;GO:0009581//detection of external stimu…	K16340//PH domain and leucine-rich repeat-containing protein phosphatase [EC:3.1.3.16]+ko04151//PI3K-Akt signaling pathway
665700	0.05	0	-2.32193	1.60226e-08	4.54554e-09	Hmcn2		K17341//hemicentin;K17341//hemicentin;K17341//hemicentin
668501	0.1	0.02	-2.32193	0.000519359	0.00023503	Zfp507	GO:0031326//regulation of cellular biosynthetic process;GO:2001141//regulation of RNA biosynthetic process;GO:0009889//regulation of biosynthetic process;GO:0044238//primary metabolic process;GO:0019438//aromatic compound biosynthetic process;GO:0006139//nucleobase-containing compound metabolic process;GO:0043170//macromolecule metabolic process;GO:0006355//regulation of transcription, DNA-templa…	K09228//KRAB domain-containing zinc finger protein;K09228//KRAB domain-containing zinc finger protein;K09228//KRAB domain-containing zinc finger protein
71683	1.25	0.25	-2.32193	2.44156e-14	4.60902e-15	Gypc	GO:0007157//heterophilic cell-cell adhesion via plasma membrane cell adhesion molecules;GO:0007155//cell adhesion;GO:0098742//cell-cell adhesion via plasma-membrane adhesion molecules;GO:0009987//cellular process;GO:0022610//biological adhesion;GO:0008037//cell recognition;GO:0007156//homophilic cell adhesion via plasma membrane adhesion molecules;GO:0098609//cell-cell adhesion;GO:0005912//adhere…	K06576//glycophorin C+ko05144//Malaria;K06576//glycophorin C+ko05144//Malaria
72296	0.9	0.18	-2.32193	4.5758e-09	1.24099e-09	Rusc1	GO:0044267//cellular protein metabolic process;GO:1901564//organonitrogen compound metabolic process;GO:0043412//macromolecule modification;GO:0070647//protein modification by small protein conjugation or removal;GO:0009987//cellular process;GO:0006464//cellular protein modification process;GO:0032446//protein modification by small protein conjugation;GO:0044238//primary metabolic process;GO:0036…	K12384//lysosome membrane protein 2+ko04142//Lysosome
99681	0.1	0.02	-2.32193	0.000981866	0.000463468	Tchh	GO:0016043//cellular component organization;GO:0045109//intermediate filament organization;GO:0097435//supramolecular fiber organization;GO:0006996//organelle organization;GO:0045103//intermediate filament-based process;GO:0071840//cellular component organization or biogenesis;GO:0009987//cellular process;GO:0045104//intermediate filament cytoskeleton organization;GO:0007010//cytoskeleton organiz…	K18626//trichohyalin
432867	1.84	0.37	-2.31411	0.000519504	0.00023503	Defb48	GO:0006952//defense response;GO:0006950//response to stress;GO:0050896//response to stimulus;GO:0005576//extracellular region;
100764	3.37	0.68	-2.30914	3.19055e-25	3.66848e-26	Rita1	GO:0006810//transport;GO:0050794//regulation of cellular process;GO:0007165//signal transduction;GO:0007399//nervous system development;GO:0045746//negative regulation of Notch signaling pathway;GO:0009987//cellular process;GO:0048583//regulation of response to stimulus;GO:0009968//negative regulation of signal transduction;GO:0009966//regulation of signal transduction;GO:0048585//negative regula…
69047	6.44	1.3	-2.30855	1.39831e-79	4.48024e-81	Atp2c2	GO:0050789//regulation of biological process;GO:0007275//multicellular organism development;GO:0032879//regulation of localization;GO:0048513//animal organ development;GO:0033036//macromolecule localization;GO:0051050//positive regulation of transport;GO:1990778//protein localization to cell periphery;GO:0072659//protein localization to plasma membrane;GO:0010959//regulation of metal ion transpor…	K01537//Ca2+-transporting ATPase [EC:3.6.3.8];K01537//Ca2+-transporting ATPase [EC:3.6.3.8]
74201	0.84	0.17	-2.30485	0.000113536	4.6904e-05	Cep97	GO:0010564//regulation of cell cycle process;GO:0120035//regulation of plasma membrane bounded cell projection organization;GO:0010639//negative regulation of organelle organization;GO:0033043//regulation of organelle organization;GO:0051726//regulation of cell cycle;GO:0090169//regulation of spindle assembly;GO:0071840//cellular component organization or biogenesis;GO:1902017//regulation of cili…	K16717//centrosomal protein CEP97
100504285	0.78	0.16	-2.2854	8.3296e-05	3.3828e-05	Abhd12b		K13705//abhydrolase domain-containing protein 12B;K13705//abhydrolase domain-containing protein 12B
20322	0.78	0.16	-2.2854	1.25486e-08	3.522e-09	Sord	GO:0010035//response to inorganic substance;GO:0006950//response to stress;GO:0009605//response to external stimulus;GO:0006970//response to osmotic stress;GO:0016052//carbohydrate catabolic process;GO:0071704//organic substance metabolic process;GO:0046364//monosaccharide biosynthetic process;GO:0009058//biosynthetic process;GO:0044283//small molecule biosynthetic process;GO:0006066//alcohol met…	K00008//L-iditol 2-dehydrogenase [EC:1.1.1.14]+ko00040//Pentose and glucuronate interconversions+ko00051//Fructose and mannose metabolism+ko01100//Metabolic pathways
70296	0.34	0.07	-2.28011	1.49327e-05	5.53326e-06	Tbc1d13	GO:0065009//regulation of molecular function;GO:0051649//establishment of localization in cell;GO:0043547//positive regulation of GTPase activity;GO:0051345//positive regulation of hydrolase activity;GO:0044093//positive regulation of molecular function;GO:0031338//regulation of vesicle fusion;GO:0070727//cellular macromolecule localization;GO:0042886//amide transport;GO:0051049//regulation of tr…	K12665//cytochrome P450 family 26 subfamily C+ko00830//Retinol metabolism+ko01100//Metabolic pathways;K09383//paired box protein 5+ko05202//Transcriptional misregulation in cancer;K12665//cytochrome P450 family 26 subfamily C+ko00830//Retinol metabolism+ko01100//Metabolic pathways;K09383//paired box protein 5+ko05202//Transcriptional misregulation in cancer
13178	0.63	0.13	-2.27684	7.63424e-10	1.93564e-10	Dck	GO:0008152//metabolic process;GO:0006725//cellular aromatic compound metabolic process;GO:0044238//primary metabolic process;GO:0006793//phosphorus metabolic process;GO:1901360//organic cyclic compound metabolic process;GO:0071704//organic substance metabolic process;GO:0006139//nucleobase-containing compound metabolic process;GO:0006753//nucleoside phosphate metabolic process;GO:0055086//nucleob…	K00893//deoxycitidine kinase [EC:2.7.1.74]+ko00230//Purine metabolism+ko00240//Pyrimidine metabolism+ko01100//Metabolic pathways
23854	0.67	0.14	-2.25873	1.25497e-10	3.01178e-11	Def8	GO:1900029//positive regulation of ruffle assembly;GO:0007165//signal transduction;GO:0120035//regulation of plasma membrane bounded cell projection organization;GO:0034105//positive regulation of tissue remodeling;GO:0031346//positive regulation of cell projection organization;GO:0050896//response to stimulus;GO:0034103//regulation of tissue remodeling;GO:0044089//positive regulation of cellular…	K19330//run domain Beclin-1 interacting and cysteine-rich containing protein+ko04140//Autophagy - animal
545693	0.43	0.09	-2.25634	8.33089e-05	3.3828e-05	Gm13043	GO:0045934//negative regulation of nucleobase-containing compound metabolic process;GO:0010556//regulation of macromolecule biosynthetic process;GO:0051171//regulation of nitrogen compound metabolic process;GO:0006355//regulation of transcription, DNA-templated;GO:0060255//regulation of macromolecule metabolic process;GO:0043066//negative regulation of apoptotic process;GO:0010558//negative regul…	K10308//F-box protein 31;K14284//nuclear RNA export factor+ko03013//RNA transport+ko03015//mRNA surveillance pathway+ko03008//Ribosome biogenesis in eukaryotes+ko05164//Influenza A+ko05168//Herpes simplex infection
66932	1	0.21	-2.25154	1.31405e-24	1.54984e-25	Rexo1	GO:0005634//nucleus;GO:0016604//nuclear body;GO:0044446//intracellular organelle part;GO:0031981//nuclear lumen;GO:0044428//nuclear part;GO:0043226//organelle;GO:0043229//intracellular organelle;GO:0044422//organelle part;GO:0044451//nucleoplasm part;GO:0043233//organelle lumen;GO:0070013//intracellular organelle lumen;GO:0005622//intracellular;GO:0044464//cell part;GO:0044424//intracellular part…	K14570//RNA exonuclease 1 [EC:3.1.-.-]+ko03008//Ribosome biogenesis in eukaryotes;K14570//RNA exonuclease 1 [EC:3.1.-.-]+ko03008//Ribosome biogenesis in eukaryotes
13641	0.19	0.04	-2.24793	0.000519576	0.00023503	Efnb1	GO:0014033//neural crest cell differentiation;GO:0032946//positive regulation of mononuclear cell proliferation;GO:0002682//regulation of immune system process;GO:0065007//biological regulation;GO:0001667//ameboidal-type cell migration;GO:0022008//neurogenesis;GO:0030155//regulation of cell adhesion;GO:0031295//T cell costimulation;GO:0051249//regulation of lymphocyte activation;GO:0050789//regul…	K05463//ephrin-B+ko04360//Axon guidance
666060	0.57	0.12	-2.24793	9.41432e-13	1.9553e-13	Frmpd1	GO:0023052//signaling;GO:0051179//localization;GO:0007165//signal transduction;GO:0065007//biological regulation;GO:0008277//regulation of G-protein coupled receptor protein signaling pathway;GO:0051716//cellular response to stimulus;GO:0072657//protein localization to membrane;GO:0048583//regulation of response to stimulus;GO:0050794//regulation of cellular process;GO:0051234//establishment of l…	K05725//focal adhesion kinase 1 [EC:2.7.10.2]+ko04360//Axon guidance+ko04810//Regulation of actin cytoskeleton+ko05222//Small cell lung cancer+ko04510//Focal adhesion+ko01522//Endocrine resistance+ko05418//Fluid shear stress and atherosclerosis+ko05100//Bacterial invasion of epithelial cells+ko05146//Amoebiasis+ko05200//Pathways in cancer+ko05202//Transcriptional misregulation in cancer+ko05205//…
66972	0.19	0.04	-2.24793	0.00089616	0.00041866	Slc25a23	GO:0071248//cellular response to metal ion;GO:0006812//cation transport;GO:0010038//response to metal ion;GO:0051503//adenine nucleotide transport;GO:0043467//regulation of generation of precursor metabolites and energy;GO:0019219//regulation of nucleobase-containing compound metabolic process;GO:0006811//ion transport;GO:2000021//regulation of ion homeostasis;GO:0072511//divalent inorganic catio…	K14684//solute carrier family 25 (mitochondrial phosphate transporter), member 23/24/25/41
545732	1.75	0.37	-2.24176	1.1298e-08	3.1603e-09	4933402N22Rik
100038862	0.52	0.11	-2.24101	1.34122e-05	4.94022e-06	Btnl1	GO:0009986//cell surface;GO:0044425//membrane part;GO:0016020//membrane;GO:0005623//cell;GO:0031224//intrinsic component of membrane;GO:0044464//cell part;GO:0016021//integral component of membrane;	K06712//butyrophilin
15379	0.47	0.1	-2.23266	0.0001422	5.9409e-05	Onecut1	GO:0009968//negative regulation of signal transduction;GO:0006996//organelle organization;GO:0071840//cellular component organization or biogenesis;GO:0048523//negative regulation of cellular process;GO:0048534//hematopoietic or lymphoid organ development;GO:0050896//response to stimulus;GO:0032879//regulation of localization;GO:0007154//cell communication;GO:0022607//cellular component assembly;…	K08026//one cut domain, family member 1, hepatocyte nuclear factor 6+ko04950//Maturity onset diabetes of the young+ko04550//Signaling pathways regulating pluripotency of stem cells
229615	0.47	0.1	-2.23266	4.34053e-07	1.37512e-07	Pias3	GO:0031325//positive regulation of cellular metabolic process;GO:1901564//organonitrogen compound metabolic process;GO:0065007//biological regulation;GO:0031324//negative regulation of cellular metabolic process;GO:0034645//cellular macromolecule biosynthetic process;GO:0051172//negative regulation of nitrogen compound metabolic process;GO:0031400//negative regulation of protein modification proc…	K16064//E3 SUMO-protein ligase PIAS3+ko04630//Jak-STAT signaling pathway+ko04120//Ubiquitin mediated proteolysis;K16064//E3 SUMO-protein ligase PIAS3+ko04630//Jak-STAT signaling pathway+ko04120//Ubiquitin mediated proteolysis;K16064//E3 SUMO-protein ligase PIAS3+ko04630//Jak-STAT signaling pathway+ko04120//Ubiquitin mediated proteolysis
69080	2.63	0.56	-2.23156	4.97081e-19	7.43662e-20	Gmppa	GO:0009058//biosynthetic process;GO:0008152//metabolic process;GO:0043226//organelle;GO:0031982//vesicle;GO:0005737//cytoplasm;GO:0043230//extracellular organelle;GO:0005576//extracellular region;GO:0044464//cell part;GO:0070062//extracellular exosome;GO:1903561//extracellular vesicle;GO:0005622//intracellular;GO:0043227//membrane-bounded organelle;GO:0044424//intracellular part;GO:0044421//extra…	K00966//mannose-1-phosphate guanylyltransferase [EC:2.7.7.13]+ko00051//Fructose and mannose metabolism+ko00520//Amino sugar and nucleotide sugar metabolism+ko01100//Metabolic pathways;K00966//mannose-1-phosphate guanylyltransferase [EC:2.7.7.13]+ko00051//Fructose and mannose metabolism+ko00520//Amino sugar and nucleotide sugar metabolism+ko01100//Metabolic pathways
17441	0.56	0.12	-2.22239	0.000568832	0.000258782	Mog	GO:0007155//cell adhesion;GO:0022610//biological adhesion;GO:0043209//myelin sheath;GO:0016020//membrane;GO:0016021//integral component of membrane;GO:0044464//cell part;GO:0005623//cell;GO:0031224//intrinsic component of membrane;GO:0044425//membrane part;	K17270//myelin-oligodendrocyte glycoprotein;K17270//myelin-oligodendrocyte glycoprotein
227545	0.28	0.06	-2.22239	1.49378e-05	5.53326e-06	Proser2
239556	0.14	0.03	-2.22239	1.89155e-06	6.366e-07	Cacna1i	GO:0006810//transport;GO:0060627//regulation of vesicle-mediated transport;GO:0051899//membrane depolarization;GO:0035637//multicellular organismal signaling;GO:0009987//cellular process;GO:0045921//positive regulation of exocytosis;GO:0048518//positive regulation of biological process;GO:0019226//transmission of nerve impulse;GO:0001508//action potential;GO:0048870//cell motility;GO:0017158//reg…	K04856//voltage-dependent calcium channel T type alpha-1I+ko04020//Calcium signaling pathway+ko04713//Circadian entrainment+ko04934//Cushing's syndrome+ko04010//MAPK signaling pathway+ko04927//Cortisol synthesis and secretion+ko04925//Aldosterone synthesis and secretion
66844	0.7	0.15	-2.22239	0.000519431	0.00023503	Ormdl2
224807	0.93	0.2	-2.21723	2.60571e-13	5.22456e-14	Tmem63b	GO:0006810//transport;GO:0006811//ion transport;GO:0051179//localization;GO:0051234//establishment of localization;GO:0044424//intracellular part;GO:0005886//plasma membrane;GO:0071944//cell periphery;GO:0031224//intrinsic component of membrane;GO:0016021//integral component of membrane;GO:0043232//intracellular non-membrane-bounded organelle;GO:0016020//membrane;GO:0044425//membrane part;GO:0043…	K21989//calcium permeable stress-gated cation channel
68742	1.34	0.29	-2.20811	2.42259e-06	8.22962e-07	Tmem219	GO:0044425//membrane part;GO:0031224//intrinsic component of membrane;GO:0016021//integral component of membrane;GO:0016020//membrane;
20897	0.23	0.05	-2.20163	0.000896281	0.00041866	Stra6	GO:1905314//semi-lunar valve development;GO:0072001//renal system development;GO:0003205//cardiac chamber development;GO:0006820//anion transport;GO:0031223//auditory behavior;GO:0006082//organic acid metabolic process;GO:0034220//ion transmembrane transport;GO:0009653//anatomical structure morphogenesis;GO:0072359//circulatory system development;GO:0061029//eyelid development in camera-type eye;…
104709	0.32	0.07	-2.19265	2.27373e-05	8.59874e-06	Pik3r6	GO:0002706//regulation of lymphocyte mediated immunity;GO:0022603//regulation of anatomical structure morphogenesis;GO:0009893//positive regulation of metabolic process;GO:0045595//regulation of cell differentiation;GO:0065009//regulation of molecular function;GO:0022407//regulation of cell-cell adhesion;GO:0045597//positive regulation of cell differentiation;GO:0022409//positive regulation of ce…	K21290//phosphoinositide-3-kinase regulatory subunit 5/6+ko04022//cGMP-PKG signaling pathway+ko04072//Phospholipase D signaling pathway+ko04725//Cholinergic synapse+ko04611//Platelet activation+ko04261//Adrenergic signaling in cardiomyocytes+ko05145//Toxoplasmosis+ko04371//Apelin signaling pathway+ko04151//PI3K-Akt signaling pathway+ko04921//Oxytocin signaling pathway+ko05167//Kaposi's sarcoma-as…
21940	0.77	0.17	-2.17932	7.37428e-05	2.97576e-05	Cd27	GO:0007154//cell communication;GO:0045937//positive regulation of phosphate metabolic process;GO:0070228//regulation of lymphocyte apoptotic process;GO:2000106//regulation of leukocyte apoptotic process;GO:0015833//peptide transport;GO:0007166//cell surface receptor signaling pathway;GO:0008283//cell proliferation;GO:0043410//positive regulation of MAPK cascade;GO:0046903//secretion;GO:0001817//r…	K05144//tumor necrosis factor receptor superfamily member 7+ko04060//Cytokine-cytokine receptor interaction;K05144//tumor necrosis factor receptor superfamily member 7+ko04060//Cytokine-cytokine receptor interaction
226351	1.63	0.36	-2.1788	1.86336e-20	2.59496e-21	Tmem185b	GO:0044425//membrane part;GO:0031224//intrinsic component of membrane;GO:0016020//membrane;GO:0016021//integral component of membrane;	K18207//protein O-mannose beta-1,4-N-acetylglucosaminyltransferase [EC:2.4.1.312]+ko00515//Mannose type O-glycan biosynthesis+ko01100//Metabolic pathways
229699	1.22	0.27	-2.17585	7.7024e-13	1.59489e-13	Slc16a4	GO:0015849//organic acid transport;GO:0006810//transport;GO:0015718//monocarboxylic acid transport;GO:0071702//organic substance transport;GO:0051179//localization;GO:0006820//anion transport;GO:0006811//ion transport;GO:0046942//carboxylic acid transport;GO:0051234//establishment of localization;GO:0015711//organic anion transport;GO:0005886//plasma membrane;GO:0016020//membrane;GO:0044459//plas…	K08181//MFS transporter, MCP family, solute carrier family 16 (monocarboxylic acid transporters), member 4
16322	1.67	0.37	-2.17425	5.4425e-11	1.26837e-11	Inha	GO:0043408//regulation of MAPK cascade;GO:0051726//regulation of cell cycle;GO:0019538//protein metabolic process;GO:0051716//cellular response to stimulus;GO:0023056//positive regulation of signaling;GO:0010033//response to organic substance;GO:0090092//regulation of transmembrane receptor protein serine/threonine kinase signaling pathway;GO:0046883//regulation of hormone secretion;GO:0046660//f…	K05500//inhibin, alpha+ko04060//Cytokine-cytokine receptor interaction
109052	0.27	0.06	-2.16993	4.87687e-05	1.91537e-05	Krt75	GO:0048731//system development;GO:0009987//cellular process;GO:0030097//hemopoiesis;GO:0002244//hematopoietic progenitor cell differentiation;GO:0048856//anatomical structure development;GO:0032501//multicellular organismal process;GO:0002520//immune system development;GO:0048869//cellular developmental process;GO:0032502//developmental process;GO:0048534//hematopoietic or lymphoid organ developm…	K07605//type II keratin, basic
BGI_novel_G000492	2.87	0.64	-2.16491	1.62399e-14	3.03698e-15	BGI_novel_G000492		K10279//F-box and leucine-rich repeat protein 13;K06065//nuclear receptor co-repressor 2+ko04330//Notch signaling pathway+ko05169//Epstein-Barr virus infection;K13210//far upstream element-binding protein;K09228//KRAB domain-containing zinc finger protein
11745	1.03	0.23	-2.16294	1.06026e-07	3.20184e-08	Anxa3	GO:0051090//regulation of DNA binding transcription factor activity;GO:0002252//immune effector process;GO:0030335//positive regulation of cell migration;GO:0051171//regulation of nitrogen compound metabolic process;GO:0006950//response to stress;GO:0040017//positive regulation of locomotion;GO:0040012//regulation of locomotion;GO:0009607//response to biotic stimulus;GO:0031326//regulation of cel…	K17089//annexin A3
21647	1.47	0.33	-2.15528	2.27449e-05	8.59874e-06	Tcte3	GO:0051234//establishment of localization;GO:0009987//cellular process;GO:0051179//localization;GO:0006928//movement of cell or subcellular component;GO:0006810//transport;GO:0007017//microtubule-based process;GO:0007018//microtubule-based movement;GO:0043226//organelle;GO:0043234//protein complex;GO:0016020//membrane;GO:0042995//cell projection;GO:0015630//microtubule cytoskeleton;GO:0097223//sp…	K22197//BRG1-associated factor 45A+ko05225//Hepatocellular carcinoma;K18631//tektin-4
19401	0.4	0.09	-2.152	2.27411e-05	8.59874e-06	Rara	GO:0032656//regulation of interleukin-13 production;GO:1902106//negative regulation of leukocyte differentiation;GO:0032736//positive regulation of interleukin-13 production;GO:0010646//regulation of cell communication;GO:0050896//response to stimulus;GO:0045628//regulation of T-helper 2 cell differentiation;GO:0019538//protein metabolic process;GO:0071396//cellular response to lipid;GO:0002762//…	K08527//retinoic acid receptor alpha+ko04915//Estrogen signaling pathway+ko04659//Th17 cell differentiation+ko05200//Pathways in cancer+ko05202//Transcriptional misregulation in cancer+ko05221//Acute myeloid leukemia
219158	0.31	0.07	-2.14684	7.02189e-06	2.49874e-06	Ccar2	GO:0009058//biosynthetic process;GO:0051171//regulation of nitrogen compound metabolic process;GO:0044237//cellular metabolic process;GO:0007165//signal transduction;GO:0010468//regulation of gene expression;GO:0006974//cellular response to DNA damage stimulus;GO:0044092//negative regulation of molecular function;GO:0046483//heterocycle metabolic process;GO:0006397//mRNA processing;GO:1903050//re…	K22016//mucin-3/17
231863	0.62	0.14	-2.14684	1.92008e-08	5.47626e-09	Fbxl18	GO:0004842//ubiquitin-protein transferase activity;GO:0003824//catalytic activity;GO:0016740//transferase activity;GO:0019787//ubiquitin-like protein transferase activity;GO:0140096//catalytic activity, acting on a protein;	K10284//F-box and leucine-rich repeat protein 18;K10284//F-box and leucine-rich repeat protein 18
76630	1.46	0.33	-2.14543	2.90982e-13	5.85268e-14	Stambpl1	GO:0016020//membrane;GO:0043169//cation binding;GO:0046872//metal ion binding;GO:0140096//catalytic activity, acting on a protein;GO:0016787//hydrolase activity;GO:0005488//binding;GO:0043167//ion binding;GO:0003824//catalytic activity;GO:0070011//peptidase activity, acting on L-amino acid peptides;GO:0008233//peptidase activity;GO:0008237//metallopeptidase activity;	K11867//AMSH-like protease [EC:3.4.19.12]
20975	0.35	0.08	-2.12928	1.13005e-08	3.1603e-09	Synj2	GO:0051646//mitochondrion localization;GO:0044281//small molecule metabolic process;GO:0046486//glycerolipid metabolic process;GO:0046856//phosphatidylinositol dephosphorylation;GO:0046839//phospholipid dephosphorylation;GO:0006796//phosphate-containing compound metabolic process;GO:0007399//nervous system development;GO:0048311//mitochondrion distribution;GO:0009987//cellular process;GO:0048312/…	K20279//synaptojanin [EC:3.1.3.36]+ko04070//Phosphatidylinositol signaling system+ko00562//Inositol phosphate metabolism+ko01100//Metabolic pathways;K20279//synaptojanin [EC:3.1.3.36]+ko04070//Phosphatidylinositol signaling system+ko00562//Inositol phosphate metabolism+ko01100//Metabolic pathways;K20279//synaptojanin [EC:3.1.3.36]+ko04070//Phosphatidylinositol signaling system+ko00562//Inositol p…
BGI_novel_G000076	2.58	0.59	-2.12858	4.227e-14	8.08342e-15	BGI_novel_G000076		K06856//immunoglobulin heavy chain+ko04020//Calcium signaling pathway+ko05414//Dilated cardiomyopathy (DCM)+ko05416//Viral myocarditis+ko04145//Phagosome+ko04640//Hematopoietic cell lineage+ko04072//Phospholipase D signaling pathway+ko04650//Natural killer cell mediated cytotoxicity+ko05322//Systemic lupus erythematosus+ko04664//Fc epsilon RI signaling pathway+ko04666//Fc gamma R-mediated phagocy…
235312	1.88	0.43	-2.12832	5.20099e-12	1.13041e-12	C1qtnf5	GO:0046530//photoreceptor cell differentiation;GO:0048468//cell development;GO:0007600//sensory perception;GO:0007601//visual perception;GO:0048666//neuron development;GO:0048513//animal organ development;GO:0090596//sensory organ morphogenesis;GO:0003008//system process;GO:0048592//eye morphogenesis;GO:0022008//neurogenesis;GO:0001754//eye photoreceptor cell differentiation;GO:0007423//sensory o…	K06237//collagen, type IV, alpha+ko05222//Small cell lung cancer+ko04512//ECM-receptor interaction+ko04510//Focal adhesion+ko04933//AGE-RAGE signaling pathway in diabetic complications+ko05146//Amoebiasis+ko04974//Protein digestion and absorption+ko05200//Pathways in cancer+ko04151//PI3K-Akt signaling pathway+ko04926//Relaxin signaling pathway+ko05165//Human papillomavirus infection
12444	0.13	0.03	-2.11548	0.000159006	6.67814e-05	Ccnd2	GO:0048732//gland development;GO:0045595//regulation of cell differentiation;GO:0045664//regulation of neuron differentiation;GO:0030154//cell differentiation;GO:0051347//positive regulation of transferase activity;GO:0048522//positive regulation of cellular process;GO:0008585//female gonad development;GO:0050896//response to stimulus;GO:0010033//response to organic substance;GO:0051338//regulati…	K10151//G1/S-specific cyclin-D2+ko04390//Hippo signaling pathway+ko04630//Jak-STAT signaling pathway+ko04510//Focal adhesion+ko04218//Cellular senescence+ko04917//Prolactin signaling pathway+ko04310//Wnt signaling pathway+ko04340//Hedgehog signaling pathway+ko05200//Pathways in cancer+ko05202//Transcriptional misregulation in cancer+ko05203//Viral carcinogenesis+ko05206//MicroRNAs in cancer+ko041…
15277	2.08	0.48	-2.11548	7.40852e-44	4.79416e-45	Hk2	GO:0008219//cell death;GO:0033043//regulation of organelle organization;GO:0048856//anatomical structure development;GO:0006096//glycolytic process;GO:0009161//ribonucleoside monophosphate metabolic process;GO:0019693//ribose phosphate metabolic process;GO:0070887//cellular response to chemical stimulus;GO:0006950//response to stress;GO:1901564//organonitrogen compound metabolic process;GO:004693…	K00844//hexokinase [EC:2.7.1.1]+ko01200//Carbon metabolism+ko04910//Insulin signaling pathway+ko00010//Glycolysis / Gluconeogenesis+ko00052//Galactose metabolism+ko00500//Starch and sucrose metabolism+ko00051//Fructose and mannose metabolism+ko04973//Carbohydrate digestion and absorption+ko04930//Type II diabetes mellitus+ko00520//Amino sugar and nucleotide sugar metabolism+ko00524//Neomycin, kan…
17428	0.13	0.03	-2.11548	0.000896039	0.00041866	Mnt	GO:0065007//biological regulation;GO:2000113//negative regulation of cellular macromolecule biosynthetic process;GO:0048519//negative regulation of biological process;GO:0019222//regulation of metabolic process;GO:0060255//regulation of macromolecule metabolic process;GO:0009987//cellular process;GO:0045892//negative regulation of transcription, DNA-templated;GO:0006351//transcription, DNA-templa…	K09115//MAX-binding protein
327826	0.26	0.06	-2.11548	5.07245e-07	1.61723e-07	Frs2	GO:0050794//regulation of cellular process;GO:0060788//ectodermal placode formation;GO:0032147//activation of protein kinase activity;GO:0045595//regulation of cell differentiation;GO:0022603//regulation of anatomical structure morphogenesis;GO:0010562//positive regulation of phosphorus metabolic process;GO:0060526//prostate glandular acinus morphogenesis;GO:0000578//embryonic axis specification;…	K12461//fibroblast growth factor receptor substrate 2+ko04722//Neurotrophin signaling pathway+ko04714//Thermogenesis+ko05205//Proteoglycans in cancer
56541	0.56	0.13	-2.10692	9.82692e-07	3.20932e-07	Habp4	GO:0051246//regulation of protein metabolic process;GO:0043392//negative regulation of DNA binding;GO:0045727//positive regulation of translation;GO:0044237//cellular metabolic process;GO:0051254//positive regulation of RNA metabolic process;GO:0044260//cellular macromolecule metabolic process;GO:0051098//regulation of binding;GO:0044281//small molecule metabolic process;GO:0008380//RNA splicing;…	K19019//intracellular hyaluronan-binding protein 4
52822	0.43	0.1	-2.10434	2.83449e-05	1.08588e-05	Rufy3	GO:0048518//positive regulation of biological process;GO:0032501//multicellular organismal process;GO:0010720//positive regulation of cell development;GO:0051272//positive regulation of cellular component movement;GO:0051128//regulation of cellular component organization;GO:0045664//regulation of neuron differentiation;GO:0031345//negative regulation of cell projection organization;GO:0006996//or…	K10742//DNA replication ATP-dependent helicase Dna2 [EC:3.6.4.12]+ko03030//DNA replication;K12482//RUN and FYVE domain-containing protein 1+ko04144//Endocytosis;K10742//DNA replication ATP-dependent helicase Dna2 [EC:3.6.4.12]+ko03030//DNA replication;K12482//RUN and FYVE domain-containing protein 1+ko04144//Endocytosis;K10742//DNA replication ATP-dependent helicase Dna2 [EC:3.6.4.12]+ko03030//DN…
BGI_novel_G000209	0.86	0.2	-2.10434	2.55665e-05	9.74444e-06	BGI_novel_G000209	GO:1903507//negative regulation of nucleic acid-templated transcription;GO:1901360//organic cyclic compound metabolic process;GO:0009058//biosynthetic process;GO:0031326//regulation of cellular biosynthetic process;GO:0009987//cellular process;GO:2000112//regulation of cellular macromolecule biosynthetic process;GO:0034641//cellular nitrogen compound metabolic process;GO:0080090//regulation of pr…	K03000//DNA-directed RNA polymerase I subunit RPA12+ko00230//Purine metabolism+ko03020//RNA polymerase+ko00240//Pyrimidine metabolism+ko01100//Metabolic pathways
73419	0.73	0.17	-2.10236	2.24448e-07	6.95074e-08	Armt1	GO:0050789//regulation of biological process;GO:0032259//methylation;GO:0080134//regulation of response to stress;GO:0050794//regulation of cellular process;GO:0080135//regulation of cellular response to stress;GO:0006974//cellular response to DNA damage stimulus;GO:0006950//response to stress;GO:0051716//cellular response to stimulus;GO:0065007//biological regulation;GO:0033554//cellular respons…	K08550//estrogen receptor alpha+ko01522//Endocrine resistance+ko04919//Thyroid hormone signaling pathway+ko04917//Prolactin signaling pathway+ko04915//Estrogen signaling pathway+ko05200//Pathways in cancer+ko05205//Proteoglycans in cancer+ko05224//Breast cancer+ko04961//Endocrine and other factor-regulated calcium reabsorption;K17509//pyruvate dehydrogenase phosphatase regulatory subunit
73658	0.3	0.07	-2.09954	0.000240478	0.000103714	Spns1	GO:0055085//transmembrane transport;GO:0050896//response to stimulus;GO:0007186//G-protein coupled receptor signaling pathway;GO:0051716//cellular response to stimulus;GO:0003376//sphingosine-1-phosphate signaling pathway;GO:0040011//locomotion;GO:0007165//signal transduction;GO:0023052//signaling;GO:0090520//sphingolipid mediated signaling pathway;GO:0007154//cell communication;GO:0051234//estab…	K20225//capicua transcriptional repressor+ko04013//MAPK signaling pathway - fly;K14156//choline/ethanolamine kinase [EC:2.7.1.32 2.7.1.82]+ko00564//Glycerophospholipid metabolism+ko05231//Choline metabolism in cancer+ko01100//Metabolic pathways
20846	0.94	0.22	-2.09516	3.46462e-18	5.40398e-19	Stat1	GO:0051093//negative regulation of developmental process;GO:0044237//cellular metabolic process;GO:1902680//positive regulation of RNA biosynthetic process;GO:1903506//regulation of nucleic acid-templated transcription;GO:0006950//response to stress;GO:0009893//positive regulation of metabolic process;GO:0097696//STAT cascade;GO:0006807//nitrogen compound metabolic process;GO:0035458//cellular re…	K11220//signal transducer and activator of transcription 1+ko04630//Jak-STAT signaling pathway+ko04933//AGE-RAGE signaling pathway in diabetic complications+ko04217//Necroptosis+ko04919//Thyroid hormone signaling pathway+ko04917//Prolactin signaling pathway+ko04658//Th1 and Th2 cell differentiation+ko04659//Th17 cell differentiation+ko04380//Osteoclast differentiation+ko04625//C-type lectin recep…
17769	0.17	0.04	-2.08746	5.48647e-05	2.17694e-05	Mthfr	GO:0006760//folic acid-containing compound metabolic process;GO:0006555//methionine metabolic process;GO:0046653//tetrahydrofolate metabolic process;GO:0033044//regulation of chromosome organization;GO:0001666//response to hypoxia;GO:0051593//response to folic acid;GO:0019222//regulation of metabolic process;GO:0042221//response to chemical;GO:0006725//cellular aromatic compound metabolic process…	K00297//methylenetetrahydrofolate reductase (NADPH) [EC:1.5.1.20]+ko00670//One carbon pool by folate+ko01200//Carbon metabolism+ko01523//Antifolate resistance+ko01100//Metabolic pathways;K00297//methylenetetrahydrofolate reductase (NADPH) [EC:1.5.1.20]+ko00670//One carbon pool by folate+ko01200//Carbon metabolism+ko01523//Antifolate resistance+ko01100//Metabolic pathways;K00297//methylenetetrahyd…
51885	0.34	0.08	-2.08746	5.82972e-07	1.8708e-07	Tubgcp4	GO:0065003//macromolecular complex assembly;GO:0007020//microtubule nucleation;GO:0051415//interphase microtubule nucleation by interphase microtubule organizing center;GO:0007049//cell cycle;GO:0000278//mitotic cell cycle;GO:0000226//microtubule cytoskeleton organization;GO:0043933//macromolecular complex subunit organization;GO:0097435//supramolecular fiber organization;GO:0140014//mitotic nucl…	K16571//gamma-tubulin complex component 4
53609	1.19	0.28	-2.08746	1.32149e-11	2.95386e-12	Clasrp	GO:0046483//heterocycle metabolic process;GO:0043170//macromolecule metabolic process;GO:0006139//nucleobase-containing compound metabolic process;GO:0006397//mRNA processing;GO:0006725//cellular aromatic compound metabolic process;GO:0016070//RNA metabolic process;GO:0008152//metabolic process;GO:0009987//cellular process;GO:1901360//organic cyclic compound metabolic process;GO:0044237//cellular…	K13168//splicing factor, arginine/serine-rich 16;K13168//splicing factor, arginine/serine-rich 16
64899	0.51	0.12	-2.08746	8.07762e-08	2.41488e-08	Lpin3	GO:0006082//organic acid metabolic process;GO:0051254//positive regulation of RNA metabolic process;GO:0019222//regulation of metabolic process;GO:0072329//monocarboxylic acid catabolic process;GO:0071704//organic substance metabolic process;GO:0006357//regulation of transcription from RNA polymerase II promoter;GO:0044238//primary metabolic process;GO:0045893//positive regulation of transcriptio…	K15728//phosphatidate phosphatase LPIN [EC:3.1.3.4]+ko00564//Glycerophospholipid metabolism+ko00561//Glycerolipid metabolism+ko01100//Metabolic pathways;K15728//phosphatidate phosphatase LPIN [EC:3.1.3.4]+ko00564//Glycerophospholipid metabolism+ko00561//Glycerolipid metabolism+ko01100//Metabolic pathways
84036	0.21	0.05	-2.07039	0.000345436	0.00015214	Kcnn1	GO:0071944//cell periphery;GO:0044425//membrane part;GO:0097458//neuron part;GO:0016020//membrane;GO:0044464//cell part;GO:0044424//intracellular part;GO:0016021//integral component of membrane;GO:0005623//cell;GO:0044297//cell body;GO:0005886//plasma membrane;GO:0005737//cytoplasm;GO:0043025//neuronal cell body;GO:0005622//intracellular;GO:0031224//intrinsic component of membrane;GO:0036477//som…	K04942//potassium intermediate/small conductance calcium-activated channel subfamily N member 1+ko04911//Insulin secretion;K04942//potassium intermediate/small conductance calcium-activated channel subfamily N member 1+ko04911//Insulin secretion
15312	14.34	3.42	-2.06798	1.03706e-65	4.19272e-67	Hmgn1	GO:0006259//DNA metabolic process;GO:0065007//biological regulation;GO:0050678//regulation of epithelial cell proliferation;GO:0006357//regulation of transcription from RNA polymerase II promoter;GO:0050789//regulation of biological process;GO:0009411//response to UV;GO:0051276//chromosome organization;GO:0033554//cellular response to stress;GO:0032501//multicellular organismal process;GO:0010224…	K11299//high-mobility group nucleosome-binding domain-containing protein 1+ko05168//Herpes simplex infection
108148	0.67	0.16	-2.06609	3.58951e-12	7.73368e-13	Galnt2	GO:0044267//cellular protein metabolic process;GO:0036211//protein modification process;GO:0002377//immunoglobulin production;GO:0043413//macromolecule glycosylation;GO:0016266//O-glycan processing;GO:0071704//organic substance metabolic process;GO:0009059//macromolecule biosynthetic process;GO:0019538//protein metabolic process;GO:0009058//biosynthetic process;GO:1901566//organonitrogen compound…	K00710//polypeptide N-acetylgalactosaminyltransferase [EC:2.4.1.41]+ko00512//Mucin type O-glycan biosynthesis+ko01100//Metabolic pathways
192970	2.01	0.48	-2.06609	6.04393e-12	1.31743e-12	Dhrs11		K15890//NADP+-dependent farnesol dehydrogenase [EC:1.1.1.216]+ko00981//Insect hormone biosynthesis+ko00900//Terpenoid backbone biosynthesis
22793	0.46	0.11	-2.06413	3.82912e-05	1.48914e-05	Zyx	GO:0030029//actin filament-based process;GO:0022607//cellular component assembly;GO:0006996//organelle organization;GO:0022610//biological adhesion;GO:0032101//regulation of response to external stimulus;GO:0050896//response to stimulus;GO:0071495//cellular response to endogenous stimulus;GO:0023052//signaling;GO:0051716//cellular response to stimulus;GO:0051017//actin filament bundle assembly;GO…	K06273//zyxin+ko04510//Focal adhesion
234814	1.21	0.29	-2.06088	3.26691e-08	9.45972e-09	Mthfsd	GO:0006403//RNA localization;GO:0008298//intracellular mRNA localization;GO:0070727//cellular macromolecule localization;GO:0051641//cellular localization;GO:0051179//localization;GO:0033036//macromolecule localization;GO:0005623//cell;GO:0044424//intracellular part;GO:0005737//cytoplasm;GO:0005622//intracellular;GO:0044464//cell part;GO:1901363//heterocyclic compound binding;GO:0003723//RNA bind…
230379	0.25	0.06	-2.05889	3.82974e-05	1.48914e-05	Acer2	GO:0050896//response to stimulus;GO:0008152//metabolic process;GO:0051171//regulation of nitrogen compound metabolic process;GO:1901617//organic hydroxy compound biosynthetic process;GO:1903019//negative regulation of glycoprotein metabolic process;GO:0031323//regulation of cellular metabolic process;GO:0042221//response to chemical;GO:0009892//negative regulation of metabolic process;GO:1901615/…	K01441//alkaline ceramidase [EC:3.5.1.23]+ko04071//Sphingolipid signaling pathway+ko00600//Sphingolipid metabolism+ko01100//Metabolic pathways
13710	1.99	0.48	-2.05166	1.20435e-16	2.02054e-17	Elf3	GO:0048522//positive regulation of cellular process;GO:0051253//negative regulation of RNA metabolic process;GO:0031324//negative regulation of cellular metabolic process;GO:0009890//negative regulation of biosynthetic process;GO:0010629//negative regulation of gene expression;GO:0019222//regulation of metabolic process;GO:0022612//gland morphogenesis;GO:0009987//cellular process;GO:0043062//extr…	K09429//E74-like factor 3
381693	1.78	0.43	-2.04947	5.06606e-08	1.48962e-08	Wdr95		K02988//small subunit ribosomal protein S5+ko03010//Ribosome;K21957//pseudokinase FAM20A;K10260//F-box and WD-40 domain protein 7+ko04120//Ubiquitin mediated proteolysis
11785	2.19	0.53	-2.04687	7.64728e-25	8.90856e-26	Apbb1	GO:0044237//cellular metabolic process;GO:0006725//cellular aromatic compound metabolic process;GO:0032989//cellular component morphogenesis;GO:0009889//regulation of biosynthetic process;GO:0045665//negative regulation of neuron differentiation;GO:0031324//negative regulation of cellular metabolic process;GO:0033554//cellular response to stress;GO:0006281//DNA repair;GO:0031326//regulation of ce…	K04529//amyloid beta A4 precursor protein-binding family B member 1+ko05010//Alzheimer's disease;K04529//amyloid beta A4 precursor protein-binding family B member 1+ko05010//Alzheimer's disease;K04529//amyloid beta A4 precursor protein-binding family B member 1+ko05010//Alzheimer's disease;K04529//amyloid beta A4 precursor protein-binding family B member 1+ko05010//Alzheimer's disease;K04529//amy…
13350	2.55	0.62	-2.04016	2.10437e-17	3.3938e-18	Dgat1	GO:0045923//positive regulation of fatty acid metabolic process;GO:0046879//hormone secretion;GO:0046463//acylglycerol biosynthetic process;GO:0017144//drug metabolic process;GO:1905952//regulation of lipid localization;GO:0080090//regulation of primary metabolic process;GO:1901568//fatty acid derivative metabolic process;GO:0050801//ion homeostasis;GO:0031323//regulation of cellular metabolic pr…	K11155//diacylglycerol O-acyltransferase 1 [EC:2.3.1.20 2.3.1.75 2.3.1.76]+ko00830//Retinol metabolism+ko04975//Fat digestion and absorption+ko00561//Glycerolipid metabolism+ko01100//Metabolic pathways;K11155//diacylglycerol O-acyltransferase 1 [EC:2.3.1.20 2.3.1.75 2.3.1.76]+ko00830//Retinol metabolism+ko04975//Fat digestion and absorption+ko00561//Glycerolipid metabolism+ko01100//Metabolic path…
14087	0.74	0.18	-2.03953	4.86538e-14	9.33184e-15	Fanca	GO:0045137//development of primary sexual characteristics;GO:0030155//regulation of cell adhesion;GO:0046661//male sex differentiation;GO:0007276//gamete generation;GO:0045580//regulation of T cell differentiation;GO:0022402//cell cycle process;GO:0006996//organelle organization;GO:0033554//cellular response to stress;GO:0002682//regulation of immune system process;GO:0007049//cell cycle;GO:00421…	K10888//fanconi anemia group A protein+ko03460//Fanconi anemia pathway;K10888//fanconi anemia group A protein+ko03460//Fanconi anemia pathway;K10888//fanconi anemia group A protein+ko03460//Fanconi anemia pathway;K10888//fanconi anemia group A protein+ko03460//Fanconi anemia pathway;K10888//fanconi anemia group A protein+ko03460//Fanconi anemia pathway;K10888//fanconi anemia group A protein+ko034…
BGI_novel_G000027	0.37	0.09	-2.03953	0.00012427	5.15736e-05	BGI_novel_G000027	GO:0043067//regulation of programmed cell death;GO:0042981//regulation of apoptotic process;GO:0050789//regulation of biological process;GO:0009987//cellular process;GO:0065007//biological regulation;GO:0010941//regulation of cell death;GO:0008219//cell death;GO:0050794//regulation of cellular process;GO:0006915//apoptotic process;GO:0012501//programmed cell death;GO:0043226//organelle;GO:0016020…	K15485//Bcl-2-like protein 13+ko05134//Legionellosis+ko04137//Mitophagy - animal
231002	0.45	0.11	-2.03242	6.41537e-05	2.56534e-05	Plekhn1		K13710//Rho guanine nucleotide exchange factor 7+ko04810//Regulation of actin cytoskeleton;K05729//Rho guanine nucleotide exchange factor 6+ko04810//Regulation of actin cytoskeleton+ko05212//Pancreatic cancer
76713	1.38	0.34	-2.02106	1.02908e-11	2.28144e-12	1700039E15Rik	GO:0016021//integral component of membrane;GO:0016020//membrane;GO:0044425//membrane part;GO:0031224//intrinsic component of membrane;GO:0015077//monovalent inorganic cation transmembrane transporter activity;GO:0046873//metal ion transmembrane transporter activity;GO:0015081//sodium ion transmembrane transporter activity;GO:0015318//inorganic molecular entity transmembrane transporter activity;G…	K05048//solute carrier family 6 (neurotransmitter transporter, amino acid/orphan) member 15/16/17/18/20
76742	0.89	0.22	-2.0163	8.15675e-22	1.07779e-22	Snx27	GO:0015031//protein transport;GO:0071702//organic substance transport;GO:0098876//vesicle-mediated transport to the plasma membrane;GO:0023052//signaling;GO:0009987//cellular process;GO:0016197//endosomal transport;GO:0034613//cellular protein localization;GO:0051179//localization;GO:0007034//vacuolar transport;GO:0042886//amide transport;GO:0007165//signal transduction;GO:0007399//nervous system…	K17936//sorting nexin-27;K17936//sorting nexin-27
83453	0.97	0.24	-2.01495	1.30667e-16	2.19468e-17	Chrdl1	GO:0090287//regulation of cellular response to growth factor stimulus;GO:0032501//multicellular organismal process;GO:0031326//regulation of cellular biosynthetic process;GO:0001654//eye development;GO:0090092//regulation of transmembrane receptor protein serine/threonine kinase signaling pathway;GO:0090101//negative regulation of transmembrane receptor protein serine/threonine kinase signaling p…	K17280//chordin-like protein 2
56273	5.06	1.26	-2.00571	9.20684e-38	6.96828e-39	Pex14	GO:0019219//regulation of nucleobase-containing compound metabolic process;GO:0010468//regulation of gene expression;GO:0051641//cellular localization;GO:0051252//regulation of RNA metabolic process;GO:2001141//regulation of RNA biosynthetic process;GO:0010970//transport along microtubule;GO:0032091//negative regulation of protein binding;GO:0009987//cellular process;GO:0032463//negative regulati…	K13343//peroxin-14+ko04146//Peroxisome
108168323	0.04	0	-2	1.21937e-05	4.46218e-06	LOC108168323		K04948//cyclic nucleotide gated channel alpha 1+ko04024//cAMP signaling pathway+ko04022//cGMP-PKG signaling pathway+ko04744//Phototransduction;K05850//Ca2+ transporting ATPase, plasma membrane [EC:3.6.3.8]+ko04024//cAMP signaling pathway+ko04022//cGMP-PKG signaling pathway+ko04020//Calcium signaling pathway+ko04261//Adrenergic signaling in cardiomyocytes+ko04970//Salivary secretion+ko04972//Pancr…
16594	0.32	0.08	-2	6.41436e-05	2.56534e-05	Klc2	GO:0006928//movement of cell or subcellular component;GO:0007017//microtubule-based process;GO:0051649//establishment of localization in cell;GO:0099111//microtubule-based transport;GO:0051179//localization;GO:0008088//axo-dendritic transport;GO:0046907//intracellular transport;GO:0007018//microtubule-based movement;GO:0006810//transport;GO:0030705//cytoskeleton-dependent intracellular transport;…	K10407//kinesin light chain+ko05132//Salmonella infection
17921	0.04	0	-2	0.000936859	0.000440746	Myo7a	GO:0042490//mechanoreceptor differentiation;GO:0048598//embryonic morphogenesis;GO:0070727//cellular macromolecule localization;GO:0060429//epithelium development;GO:0051648//vesicle localization;GO:0008544//epidermis development;GO:0000904//cell morphogenesis involved in differentiation;GO:0002065//columnar/cuboidal epithelial cell differentiation;GO:0048699//generation of neurons;GO:0034613//ce…	K10359//myosin VIIa
213311	1.16	0.29	-2	2.53917e-09	6.71346e-10	Fbxl21	GO:0048511//rhythmic process;GO:0070647//protein modification by small protein conjugation or removal;GO:0032446//protein modification by small protein conjugation;GO:0050789//regulation of biological process;GO:0006807//nitrogen compound metabolic process;GO:0043153//entrainment of circadian clock by photoperiod;GO:0044237//cellular metabolic process;GO:0044238//primary metabolic process;GO:0043…	K10287//F-box and leucine-rich repeat protein 21;K10287//F-box and leucine-rich repeat protein 21;K10287//F-box and leucine-rich repeat protein 21;K10287//F-box and leucine-rich repeat protein 21
21961	0.04	0	-2	0.000222673	9.5347e-05	Tns1	GO:0007044//cell-substrate junction assembly;GO:0016477//cell migration;GO:0071840//cellular component organization or biogenesis;GO:0044085//cellular component biogenesis;GO:0023052//signaling;GO:0034330//cell junction organization;GO:0051716//cellular response to stimulus;GO:0001667//ameboidal-type cell migration;GO:0009987//cellular process;GO:0065007//biological regulation;GO:0050789//regulat…	K18080//tensin;K18080//tensin;K18080//tensin;K18080//tensin;K18080//tensin;K18080//tensin;K18080//tensin;K18080//tensin;K18080//tensin;K18080//tensin;K18080//tensin;K18080//tensin;K18080//tensin;K18080//tensin;K18080//tensin;K18080//tensin;K18080//tensin;K18080//tensin;K18080//tensin;K18080//tensin;K18080//tensin;K18080//tensin;K18080//tensin;K18080//tensin;K18080//tensin;K18080//tensin;K18080//t…
230587	1	0.25	-2	4.53679e-12	9.82042e-13	Glis1	GO:0019219//regulation of nucleobase-containing compound metabolic process;GO:0051172//negative regulation of nitrogen compound metabolic process;GO:0010604//positive regulation of macromolecule metabolic process;GO:0060255//regulation of macromolecule metabolic process;GO:0009889//regulation of biosynthetic process;GO:0051253//negative regulation of RNA metabolic process;GO:0050794//regulation o…	K09232//zinc finger protein GLIS1/3;K09232//zinc finger protein GLIS1/3
243906	0.44	0.11	-2	7.23224e-07	2.3405e-07	Zfp14	GO:0031326//regulation of cellular biosynthetic process;GO:0010556//regulation of macromolecule biosynthetic process;GO:0009889//regulation of biosynthetic process;GO:0051252//regulation of RNA metabolic process;GO:0019219//regulation of nucleobase-containing compound metabolic process;GO:0065007//biological regulation;GO:0031323//regulation of cellular metabolic process;GO:1903506//regulation of…	K09228//KRAB domain-containing zinc finger protein
269642	0.04	0	-2	0.000937739	0.000440746	Nat8l	GO:0051588//regulation of neurotransmitter transport;GO:2001025//positive regulation of response to drug;GO:0050804//modulation of chemical synaptic transmission;GO:0032225//regulation of synaptic transmission, dopaminergic;GO:0051050//positive regulation of transport;GO:2001023//regulation of response to drug;GO:0048583//regulation of response to stimulus;GO:0010647//positive regulation of cell …	K18309//aspartate N-acetyltransferase [EC:2.3.1.17]+ko00250//Alanine, aspartate and glutamate metabolism+ko01100//Metabolic pathways
329986	1.32	0.33	-2	1.01095e-11	2.23934e-12	BC080695	GO:0048523//negative regulation of cellular process;GO:0019219//regulation of nucleobase-containing compound metabolic process;GO:0009892//negative regulation of metabolic process;GO:0019222//regulation of metabolic process;GO:0009890//negative regulation of biosynthetic process;GO:0045934//negative regulation of nucleobase-containing compound metabolic process;GO:2001141//regulation of RNA biosy…	K10308//F-box protein 31;K14284//nuclear RNA export factor+ko03013//RNA transport+ko03015//mRNA surveillance pathway+ko03008//Ribosome biogenesis in eukaryotes+ko05164//Influenza A+ko05168//Herpes simplex infection;K22614//NLR family CARD domain-containing protein 3
442834	0.04	0	-2	0.000937864	0.000440746	D830031N03Rik		K19827//microtuble-actin crosslinking factor 1
75196	0.04	0	-2	0.00010766	4.43474e-05	Ankrd7	GO:0043227//membrane-bounded organelle;GO:0043231//intracellular membrane-bounded organelle;GO:0044424//intracellular part;GO:0044464//cell part;GO:0005623//cell;GO:0005622//intracellular;GO:0043229//intracellular organelle;GO:0043226//organelle;GO:0005634//nucleus;	K17299//POTE ankyrin domain family protein
77031	0.28	0.07	-2	1.22055e-05	4.4796e-06	Slc9a8	GO:0065008//regulation of biological quality;GO:0006873//cellular ion homeostasis;GO:0055067//monovalent inorganic cation homeostasis;GO:0006885//regulation of pH;GO:0019725//cellular homeostasis;GO:0009987//cellular process;GO:0051453//regulation of intracellular pH;GO:0098660//inorganic ion transmembrane transport;GO:0042592//homeostatic process;GO:0051179//localization;GO:0030003//cellular cat…	K14724//solute carrier family 9 (sodium/hydrogen exchanger), member 8
234796	1.47	0.37	-1.99022	6.25599e-13	1.28868e-13	Klhl36	GO:0019538//protein metabolic process;GO:0044260//cellular macromolecule metabolic process;GO:0071704//organic substance metabolic process;GO:0032446//protein modification by small protein conjugation;GO:0044238//primary metabolic process;GO:0070647//protein modification by small protein conjugation or removal;GO:0044267//cellular protein metabolic process;GO:0044237//cellular metabolic process;G…	K13958//kelch-like protein 36
103806	1.23	0.31	-1.98832	3.96498e-27	4.25132e-28	Maml1	GO:0045944//positive regulation of transcription from RNA polymerase II promoter;GO:0007219//Notch signaling pathway;GO:1903506//regulation of nucleic acid-templated transcription;GO:0051149//positive regulation of muscle cell differentiation;GO:0034641//cellular nitrogen compound metabolic process;GO:0051153//regulation of striated muscle cell differentiation;GO:0031326//regulation of cellular b…	K06061//mastermind+ko04658//Th1 and Th2 cell differentiation+ko04330//Notch signaling pathway+ko05165//Human papillomavirus infection
23849	0.95	0.24	-1.98489	3.59878e-16	6.18522e-17	Klf6	GO:0044452//nucleolar part;GO:0044446//intracellular organelle part;GO:0043227//membrane-bounded organelle;GO:0070013//intracellular organelle lumen;GO:0005829//cytosol;GO:0005730//nucleolus;GO:0043228//non-membrane-bounded organelle;GO:0001650//fibrillar center;GO:0031974//membrane-enclosed lumen;GO:0044422//organelle part;GO:0005622//intracellular;GO:0043232//intracellular non-membrane-bounded …	K09207//krueppel-like factor 6/7
104175	0.79	0.2	-1.98185	3.24239e-13	6.54614e-14	Sbk1	GO:0007275//multicellular organism development;GO:0018107//peptidyl-threonine phosphorylation;GO:0032501//multicellular organismal process;GO:0018105//peptidyl-serine phosphorylation;GO:0018209//peptidyl-serine modification;GO:0018193//peptidyl-amino acid modification;GO:0007417//central nervous system development;GO:0009987//cellular process;GO:0048513//animal organ development;GO:0006796//phosp…	K08858//serine/threonine-protein kinase SBK [EC:2.7.11.1];K08858//serine/threonine-protein kinase SBK [EC:2.7.11.1];K08858//serine/threonine-protein kinase SBK [EC:2.7.11.1]
236732	0.63	0.16	-1.97728	1.56633e-08	4.43966e-09	Rbm10	GO:1902369//negative regulation of RNA catabolic process;GO:0046483//heterocycle metabolic process;GO:0010629//negative regulation of gene expression;GO:0048523//negative regulation of cellular process;GO:0006725//cellular aromatic compound metabolic process;GO:0008152//metabolic process;GO:0048522//positive regulation of cellular process;GO:0009894//regulation of catabolic process;GO:2001141//re…	K13094//RNA-binding protein 5/10;K13094//RNA-binding protein 5/10;K13094//RNA-binding protein 5/10
74094	2.79	0.71	-1.97437	2.48796e-29	2.47462e-30	Tjap1	GO:0010256//endomembrane system organization;GO:0006996//organelle organization;GO:0007030//Golgi organization;GO:0016043//cellular component organization;GO:0009987//cellular process;GO:0071840//cellular component organization or biogenesis;GO:0031410//cytoplasmic vesicle;GO:0005737//cytoplasm;GO:0044431//Golgi apparatus part;GO:0043229//intracellular organelle;GO:0098791//Golgi subcompartment;G…	K06105//tight junction protein 4+ko04530//Tight junction;K06105//tight junction protein 4+ko04530//Tight junction;K06105//tight junction protein 4+ko04530//Tight junction;K06105//tight junction protein 4+ko04530//Tight junction;K06105//tight junction protein 4+ko04530//Tight junction;K06105//tight junction protein 4+ko04530//Tight junction;K06105//tight junction protein 4+ko04530//Tight junction;…
217138	0.51	0.13	-1.97199	1.34145e-05	4.94022e-06	Prr15l
BGI_novel_G000699	0.82	0.21	-1.96523	8.06493e-09	2.23356e-09	BGI_novel_G000699	GO:0043229//intracellular organelle;GO:0043231//intracellular membrane-bounded organelle;GO:0043226//organelle;GO:0043227//membrane-bounded organelle;GO:0005622//intracellular;GO:0044464//cell part;GO:0005623//cell;GO:0005634//nucleus;GO:0044424//intracellular part;GO:0097159//organic cyclic compound binding;GO:0005488//binding;GO:0003676//nucleic acid binding;GO:0003677//DNA binding;GO:1901363//…	K19607//X-linked retinitis pigmentosa GTPase regulator
231532	1.21	0.31	-1.96467	1.02937e-11	2.28144e-12	Arhgap24	GO:1900027//regulation of ruffle assembly;GO:0120032//regulation of plasma membrane bounded cell projection assembly;GO:0031344//regulation of cell projection organization;GO:0120035//regulation of plasma membrane bounded cell projection organization;GO:0023052//signaling;GO:0044087//regulation of cellular component biogenesis;GO:0051179//localization;GO:0048585//negative regulation of response t…	K20642//Rho GTPase-activating protein 22/24/25;K20642//Rho GTPase-activating protein 22/24/25
20499	1.83	0.47	-1.96111	1.94815e-36	1.52977e-37	Slc12a7	GO:0065007//biological regulation;GO:0051234//establishment of localization;GO:0019725//cellular homeostasis;GO:0006821//chloride transport;GO:0098916//anterograde trans-synaptic signaling;GO:0055085//transmembrane transport;GO:0008361//regulation of cell size;GO:0099537//trans-synaptic signaling;GO:0006810//transport;GO:1902476//chloride transmembrane transport;GO:0006884//cell volume homeostasi…	K13627//solute carrier family 12 (potassium/chloride transporter), member 7+ko04966//Collecting duct acid secretion;K13627//solute carrier family 12 (potassium/chloride transporter), member 7+ko04966//Collecting duct acid secretion
59004	12.03	3.09	-1.96096	2.75984e-73	9.71296e-75	Pias4	GO:0033235//positive regulation of protein sumoylation;GO:0009987//cellular process;GO:0010467//gene expression;GO:0006355//regulation of transcription, DNA-templated;GO:0032502//developmental process;GO:0006357//regulation of transcription from RNA polymerase II promoter;GO:0051171//regulation of nitrogen compound metabolic process;GO:0045892//negative regulation of transcription, DNA-templated;…	K16065//E3 SUMO-protein ligase PIAS4+ko04630//Jak-STAT signaling pathway+ko05418//Fluid shear stress and atherosclerosis+ko04120//Ubiquitin mediated proteolysis+ko04064//NF-kappa B signaling pathway
60534	0.7	0.18	-1.95936	5.03753e-08	1.4806e-08	Fancg	GO:0016043//cellular component organization;GO:0006974//cellular response to DNA damage stimulus;GO:0007276//gamete generation;GO:0048869//cellular developmental process;GO:0022602//ovulation cycle process;GO:0051704//multi-organism process;GO:0046545//development of primary female sexual characteristics;GO:0048511//rhythmic process;GO:0051716//cellular response to stimulus;GO:0042698//ovulation …	K10894//fanconi anemia group G protein+ko03460//Fanconi anemia pathway;K10894//fanconi anemia group G protein+ko03460//Fanconi anemia pathway;K10894//fanconi anemia group G protein+ko03460//Fanconi anemia pathway;K10894//fanconi anemia group G protein+ko03460//Fanconi anemia pathway
116870	1.01	0.26	-1.95777	6.60859e-11	1.55263e-11	Mta1	GO:0016070//RNA metabolic process;GO:0006725//cellular aromatic compound metabolic process;GO:0040029//regulation of gene expression, epigenetic;GO:0051171//regulation of nitrogen compound metabolic process;GO:0046483//heterocycle metabolic process;GO:0044267//cellular protein metabolic process;GO:0032501//multicellular organismal process;GO:0009057//macromolecule catabolic process;GO:1901564//or…	K11660//metastasis-associated protein MTA;K11660//metastasis-associated protein MTA;K11660//metastasis-associated protein MTA;K11660//metastasis-associated protein MTA
70144	0.66	0.17	-1.95693	1.56506e-05	5.81012e-06	Lrch3	GO:0050896//response to stimulus;GO:0007165//signal transduction;GO:0009987//cellular process;GO:0051716//cellular response to stimulus;GO:0007154//cell communication;GO:0065007//biological regulation;GO:0050789//regulation of biological process;GO:0050794//regulation of cellular process;GO:0023052//signaling;GO:0005737//cytoplasm;GO:0005622//intracellular;GO:0016020//membrane;GO:0005576//extrace…	K10130//leucine-rich repeats and death domain-containing protein+ko04210//Apoptosis+ko04115//p53 signaling pathway+ko04064//NF-kappa B signaling pathway;K19613//leucine-rich repeat protein SHOC2+ko04014//Ras signaling pathway;K10130//leucine-rich repeats and death domain-containing protein+ko04210//Apoptosis+ko04115//p53 signaling pathway+ko04064//NF-kappa B signaling pathway;K19613//leucine-rich…
67978	3.22	0.83	-1.95588	4.94544e-33	4.33876e-34	Tctn2	GO:0050896//response to stimulus;GO:0051716//cellular response to stimulus;GO:0120036//plasma membrane bounded cell projection organization;GO:0007165//signal transduction;GO:0008104//protein localization;GO:0007166//cell surface receptor signaling pathway;GO:0033365//protein localization to organelle;GO:0044782//cilium organization;GO:0050794//regulation of cellular process;GO:0070727//cellular …	K19361//tectonic-2;K19361//tectonic-2
70020	1.35	0.35	-1.94753	7.47104e-06	2.66752e-06	Ino80b	GO:0051252//regulation of RNA metabolic process;GO:0044237//cellular metabolic process;GO:0006950//response to stress;GO:0006351//transcription, DNA-templated;GO:2000112//regulation of cellular macromolecule biosynthetic process;GO:0009059//macromolecule biosynthetic process;GO:0006259//DNA metabolic process;GO:0046483//heterocycle metabolic process;GO:0051716//cellular response to stimulus;GO:00…	K11666//INO80 complex subunit B
94180	0.27	0.07	-1.94753	0.000568754	0.000258782	Acsbg1	GO:0033993//response to lipid;GO:0043436//oxoacid metabolic process;GO:0044238//primary metabolic process;GO:0006629//lipid metabolic process;GO:0014070//response to organic cyclic compound;GO:0009987//cellular process;GO:0050896//response to stimulus;GO:0019752//carboxylic acid metabolic process;GO:0006082//organic acid metabolic process;GO:0006631//fatty acid metabolic process;GO:0009719//respo…	K15013//long-chain-fatty-acid--CoA ligase ACSBG [EC:6.2.1.3]+ko03320//PPAR signaling pathway+ko00061//Fatty acid biosynthesis+ko01100//Metabolic pathways+ko01212//Fatty acid metabolism+ko00071//Fatty acid degradation+ko04920//Adipocytokine signaling pathway
BGI_novel_G000104	1.77	0.46	-1.94404	1.78835e-10	4.34032e-11	BGI_novel_G000104	GO:0006915//apoptotic process;GO:1900118//negative regulation of execution phase of apoptosis;GO:0060548//negative regulation of cell death;GO:0019219//regulation of nucleobase-containing compound metabolic process;GO:0031323//regulation of cellular metabolic process;GO:0048522//positive regulation of cellular process;GO:1902510//regulation of apoptotic DNA fragmentation;GO:0070242//thymocyte apo…	K02310//DNA fragmentation factor, 45 kD, alpha subunit+ko04210//Apoptosis
17932	0.5	0.13	-1.94342	1.08931e-10	2.5991e-11	Myt1	GO:0006357//regulation of transcription from RNA polymerase II promoter;GO:0031328//positive regulation of cellular biosynthetic process;GO:0065008//regulation of biological quality;GO:0032502//developmental process;GO:2000112//regulation of cellular macromolecule biosynthetic process;GO:0009893//positive regulation of metabolic process;GO:0051049//regulation of transport;GO:0070201//regulation o…	K19607//X-linked retinitis pigmentosa GTPase regulator;K19607//X-linked retinitis pigmentosa GTPase regulator;K19607//X-linked retinitis pigmentosa GTPase regulator;K19607//X-linked retinitis pigmentosa GTPase regulator;K19607//X-linked retinitis pigmentosa GTPase regulator;K19607//X-linked retinitis pigmentosa GTPase regulator;K19607//X-linked retinitis pigmentosa GTPase regulator;K19607//X-link…
73284	0.5	0.13	-1.94342	1.02634e-05	3.7105e-06	Ddit4l	GO:0048519//negative regulation of biological process;GO:0009968//negative regulation of signal transduction;GO:0065007//biological regulation;GO:0048585//negative regulation of response to stimulus;GO:0050794//regulation of cellular process;GO:0048523//negative regulation of cellular process;GO:0023051//regulation of signaling;GO:0050789//regulation of biological process;GO:0009966//regulation o…	K08270//DNA-damage-inducible transcript 4+ko04140//Autophagy - animal+ko05206//MicroRNAs in cancer+ko04151//PI3K-Akt signaling pathway+ko04150//mTOR signaling pathway
228866	3.38	0.88	-1.94145	4.84189e-34	4.12576e-35	Pcif1	GO:0019220//regulation of phosphate metabolic process;GO:0035305//negative regulation of dephosphorylation;GO:0048523//negative regulation of cellular process;GO:0010923//negative regulation of phosphatase activity;GO:0043086//negative regulation of catalytic activity;GO:0019222//regulation of metabolic process;GO:0009892//negative regulation of metabolic process;GO:0044092//negative regulation o…	K17584//phosphorylated CTD-interacting factor 1
223453	1.19	0.31	-1.94062	3.14279e-07	9.86744e-08	Dap	GO:0051252//regulation of RNA metabolic process;GO:0030162//regulation of proteolysis;GO:0065009//regulation of molecular function;GO:0050789//regulation of biological process;GO:0051716//cellular response to stimulus;GO:2001056//positive regulation of cysteine-type endopeptidase activity;GO:0050790//regulation of catalytic activity;GO:0010950//positive regulation of endopeptidase activity;GO:006…
330222	1.15	0.3	-1.9386	6.62899e-05	2.65996e-05	Sdk1	GO:1901698//response to nitrogen compound;GO:0048646//anatomical structure formation involved in morphogenesis;GO:0048148//behavioral response to cocaine;GO:0009887//animal organ morphogenesis;GO:0043010//camera-type eye development;GO:0007610//behavior;GO:0032502//developmental process;GO:0048513//animal organ development;GO:0048856//anatomical structure development;GO:0003407//neural retina dev…	K16353//protein sidekick;K16353//protein sidekick
66816	0.69	0.18	-1.9386	1.81657e-09	4.7445e-10	Thap2	GO:0044464//cell part;GO:0044428//nuclear part;GO:0031981//nuclear lumen;GO:0043227//membrane-bounded organelle;GO:0044424//intracellular part;GO:0043228//non-membrane-bounded organelle;GO:0044422//organelle part;GO:0005623//cell;GO:0005622//intracellular;GO:0005730//nucleolus;GO:0031974//membrane-enclosed lumen;GO:0043229//intracellular organelle;GO:0005634//nucleus;GO:0043232//intracellular non…	K08816//vaccinia related kinase [EC:2.7.11.1];K13485//2-oxo-4-hydroxy-4-carboxy-5-ureidoimidazoline decarboxylase [EC:4.1.1.97]+ko00230//Purine metabolism+ko01100//Metabolic pathways;K09228//KRAB domain-containing zinc finger protein;K09314//homeobox protein DLX1/4/6
11878	0.65	0.17	-1.9349	1.61243e-07	4.94052e-08	Arx	GO:0048870//cell motility;GO:0016043//cellular component organization;GO:0046620//regulation of organ growth;GO:0006355//regulation of transcription, DNA-templated;GO:1901576//organic substance biosynthetic process;GO:0060322//head development;GO:0021846//cell proliferation in forebrain;GO:0072148//epithelial cell fate commitment;GO:0051172//negative regulation of nitrogen compound metabolic proc…	K09452//homeobox protein aristaless-related
71984	4.09	1.07	-1.93449	3.58092e-25	4.12862e-26	Sars2	GO:0006412//translation;GO:0043038//amino acid activation;GO:1901564//organonitrogen compound metabolic process;GO:0006807//nitrogen compound metabolic process;GO:0034654//nucleobase-containing compound biosynthetic process;GO:0044249//cellular biosynthetic process;GO:0044238//primary metabolic process;GO:1901362//organic cyclic compound biosynthetic process;GO:0043170//macromolecule metabolic pr…	K01875//seryl-tRNA synthetase [EC:6.1.1.11]+ko00970//Aminoacyl-tRNA biosynthesis;K01875//seryl-tRNA synthetase [EC:6.1.1.11]+ko00970//Aminoacyl-tRNA biosynthesis;K01875//seryl-tRNA synthetase [EC:6.1.1.11]+ko00970//Aminoacyl-tRNA biosynthesis;K01875//seryl-tRNA synthetase [EC:6.1.1.11]+ko00970//Aminoacyl-tRNA biosynthesis
234797	2.56	0.67	-1.93391	1.69198e-22	2.17914e-23	6430548M08Rik		K10898//fanconi anemia-associated protein+ko03460//Fanconi anemia pathway;K10898//fanconi anemia-associated protein+ko03460//Fanconi anemia pathway
380753	0.8	0.21	-1.92961	4.69613e-06	1.64505e-06	Atxn7l1		K11318//ataxin-7;K11318//ataxin-7;K11318//ataxin-7;K11318//ataxin-7;K11318//ataxin-7;K11318//ataxin-7;K11318//ataxin-7;K11318//ataxin-7
224705	3.3	0.87	-1.92338	1.8229e-33	1.57399e-34	Vps52	GO:0048869//cellular developmental process;GO:0015833//peptide transport;GO:0010668//ectodermal cell differentiation;GO:0046907//intracellular transport;GO:0009888//tissue development;GO:0048731//system development;GO:0051234//establishment of localization;GO:0015031//protein transport;GO:0006892//post-Golgi vesicle-mediated transport;GO:0008104//protein localization;GO:0009653//anatomical struct…	K20298//vacuolar protein sorting-associated protein 52
241727	0.53	0.14	-1.92057	3.4689e-10	8.60498e-11	Snph
100503884	0.87	0.23	-1.91938	1.49406e-11	3.34998e-12	Ccdc149		K11584//serine/threonine-protein phosphatase 2A regulatory subunit B'+ko04071//Sphingolipid signaling pathway+ko04728//Dopaminergic synapse+ko04261//Adrenergic signaling in cardiomyocytes+ko03015//mRNA surveillance pathway+ko04152//AMPK signaling pathway+ko04151//PI3K-Akt signaling pathway+ko04114//Oocyte meiosis+ko05165//Human papillomavirus infection;K20478//golgin subfamily B member 1;K20283//…
18709	0.34	0.09	-1.91754	7.58408e-05	3.06568e-05	Pik3r2	GO:0010648//negative regulation of cell communication;GO:0009725//response to hormone;GO:0031324//negative regulation of cellular metabolic process;GO:0009719//response to endogenous stimulus;GO:1904951//positive regulation of establishment of protein localization;GO:1900182//positive regulation of protein localization to nucleus;GO:0048015//phosphatidylinositol-mediated signaling;GO:0008104//pro…	K02649//phosphoinositide-3-kinase regulatory subunit alpha/beta/delta+ko04360//Axon guidance+ko04024//cAMP signaling pathway+ko04140//Autophagy - animal+ko04630//Jak-STAT signaling pathway+ko04810//Regulation of actin cytoskeleton+ko05222//Small cell lung cancer+ko05223//Non-small cell lung cancer+ko05226//Gastric cancer+ko05225//Hepatocellular carcinoma+ko04510//Focal adhesion+ko04933//AGE-RAGE …
56794	0.34	0.09	-1.91754	0.000290838	0.000126718	Hacl1	GO:0044237//cellular metabolic process;GO:0044248//cellular catabolic process;GO:0006082//organic acid metabolic process;GO:0016043//cellular component organization;GO:0019395//fatty acid oxidation;GO:0046395//carboxylic acid catabolic process;GO:0044085//cellular component biogenesis;GO:0044281//small molecule metabolic process;GO:0043436//oxoacid metabolic process;GO:0019752//carboxylic acid me…	K12261//2-hydroxyacyl-CoA lyase 1 [EC:4.1.-.-]+ko04146//Peroxisome
69297	0.68	0.18	-1.91754	0.000473283	0.000213134	Lrrc46	GO:0065008//regulation of biological quality;GO:0032879//regulation of localization;GO:0051128//regulation of cellular component organization;GO:0031647//regulation of protein stability;GO:0090316//positive regulation of intracellular protein transport;GO:1903827//regulation of cellular protein localization;GO:0070201//regulation of establishment of protein localization;GO:1903533//regulation of …	K19750//dynein assembly factor 1, axonemal;K17550//protein phosphatase 1 regulatory subunit 7
56190	47.07	12.46	-1.9175	1.78296e-295	1.05707e-297	Rbm38	GO:0043484//regulation of RNA splicing;GO:0072413//signal transduction involved in mitotic cell cycle checkpoint;GO:0048522//positive regulation of cellular process;GO:0043489//RNA stabilization;GO:0072331//signal transduction by p53 class mediator;GO:0071156//regulation of cell cycle arrest;GO:0061013//regulation of mRNA catabolic process;GO:0016070//RNA metabolic process;GO:0006977//DNA damage …	K12741//heterogeneous nuclear ribonucleoprotein A1/A3+ko03040//Spliceosome;K14411//RNA-binding protein Musashi+ko03015//mRNA surveillance pathway
BGI_novel_G000081	1.66	0.44	-1.91561	6.50152e-12	1.42127e-12	BGI_novel_G000081		K06856//immunoglobulin heavy chain+ko04020//Calcium signaling pathway+ko05414//Dilated cardiomyopathy (DCM)+ko05416//Viral myocarditis+ko04145//Phagosome+ko04640//Hematopoietic cell lineage+ko04072//Phospholipase D signaling pathway+ko04650//Natural killer cell mediated cytotoxicity+ko05322//Systemic lupus erythematosus+ko04664//Fc epsilon RI signaling pathway+ko04666//Fc gamma R-mediated phagocy…
78266	0.49	0.13	-1.91427	4.80788e-09	1.30484e-09	Zfp687	GO:1903506//regulation of nucleic acid-templated transcription;GO:0044237//cellular metabolic process;GO:2000112//regulation of cellular macromolecule biosynthetic process;GO:0009987//cellular process;GO:0008152//metabolic process;GO:0090304//nucleic acid metabolic process;GO:0044238//primary metabolic process;GO:0050789//regulation of biological process;GO:0031323//regulation of cellular metabol…	K19325//zinc finger protein 592
14735	1.13	0.3	-1.91329	6.51342e-09	1.78826e-09	Gpc4	GO:0009058//biosynthetic process;GO:1901135//carbohydrate derivative metabolic process;GO:0006023//aminoglycan biosynthetic process;GO:0043170//macromolecule metabolic process;GO:0006022//aminoglycan metabolic process;GO:1901137//carbohydrate derivative biosynthetic process;GO:0006807//nitrogen compound metabolic process;GO:0071704//organic substance metabolic process;GO:1901576//organic substanc…	K08110//glypican 4+ko04310//Wnt signaling pathway
79196	0.64	0.17	-1.91254	2.96663e-09	7.8792e-10	Osbpl5	GO:0015711//organic anion transport;GO:0071702//organic substance transport;GO:0006811//ion transport;GO:0006820//anion transport;GO:0010876//lipid localization;GO:0033036//macromolecule localization;GO:0006810//transport;GO:0051234//establishment of localization;GO:0051179//localization;GO:0015914//phospholipid transport;GO:0006869//lipid transport;GO:0015748//organophosphate ester transport;GO:…	K20464//oxysterol-binding protein-related protein 5+ko04979//Cholesterol metabolism;K20464//oxysterol-binding protein-related protein 5+ko04979//Cholesterol metabolism;K20464//oxysterol-binding protein-related protein 5+ko04979//Cholesterol metabolism;K20464//oxysterol-binding protein-related protein 5+ko04979//Cholesterol metabolism;K20464//oxysterol-binding protein-related protein 5+ko04979//Ch…
107476	0.15	0.04	-1.90689	5.53021e-05	2.19534e-05	Acaca	GO:0019538//protein metabolic process;GO:0060249//anatomical structure homeostasis;GO:0001894//tissue homeostasis;GO:0097305//response to alcohol;GO:0071380//cellular response to prostaglandin E stimulus;GO:0006807//nitrogen compound metabolic process;GO:0051289//protein homotetramerization;GO:0009987//cellular process;GO:0044237//cellular metabolic process;GO:0051259//protein oligomerization;GO:…	K11262//acetyl-CoA carboxylase / biotin carboxylase 1 [EC:6.4.1.2 6.3.4.14 2.1.3.15]+ko04910//Insulin signaling pathway+ko00640//Propanoate metabolism+ko00061//Fatty acid biosynthesis+ko00620//Pyruvate metabolism+ko04152//AMPK signaling pathway+ko01100//Metabolic pathways+ko01212//Fatty acid metabolism+ko04922//Glucagon signaling pathway;K11262//acetyl-CoA carboxylase / biotin carboxylase 1 [EC:6…
11899	0.3	0.08	-1.90689	1.26377e-08	3.5478e-09	Astn1	GO:0007155//cell adhesion;GO:0007158//neuron cell-cell adhesion;GO:0098609//cell-cell adhesion;GO:0040011//locomotion;GO:0007626//locomotory behavior;GO:0032502//developmental process;GO:0022610//biological adhesion;GO:0048731//system development;GO:0001764//neuron migration;GO:0032501//multicellular organismal process;GO:0007399//nervous system development;GO:0048869//cellular developmental proc…	K10414//dynein heavy chain 2, cytosolic+ko04145//Phagosome+ko05132//Salmonella infection+ko04962//Vasopressin-regulated water reabsorption;K19901//disabled homolog 2-interacting protein+ko04210//Apoptosis+ko04668//TNF signaling pathway;K05207//glutamate receptor delta-2 subunit+ko04730//Long-term depression+ko04080//Neuroactive ligand-receptor interaction;K17307//fibulin 1/2
18554	0.6	0.16	-1.90689	1.99006e-05	7.48704e-06	Pcsk7	GO:0016486//peptide hormone processing;GO:0016485//protein processing;GO:0006508//proteolysis;GO:0010467//gene expression;GO:0006518//peptide metabolic process;GO:0019538//protein metabolic process;GO:0009987//cellular process;GO:0044238//primary metabolic process;GO:0034641//cellular nitrogen compound metabolic process;GO:1901564//organonitrogen compound metabolic process;GO:0010817//regulation …	K08673//proprotein convertase subtilisin/kexin type 7 [EC:3.4.21.-];K08673//proprotein convertase subtilisin/kexin type 7 [EC:3.4.21.-];K08673//proprotein convertase subtilisin/kexin type 7 [EC:3.4.21.-];K08673//proprotein convertase subtilisin/kexin type 7 [EC:3.4.21.-];K08673//proprotein convertase subtilisin/kexin type 7 [EC:3.4.21.-]
382045	2.17	0.58	-1.90357	7.8736e-20	1.12828e-20	Adgrg5	GO:0050789//regulation of biological process;GO:0050794//regulation of cellular process;GO:0023052//signaling;GO:0050896//response to stimulus;GO:0065007//biological regulation;GO:0007166//cell surface receptor signaling pathway;GO:0051716//cellular response to stimulus;GO:0007165//signal transduction;GO:0009987//cellular process;GO:0007154//cell communication;GO:0016020//membrane;GO:0044425//mem…	K08459//G protein-coupled receptor 114;K08459//G protein-coupled receptor 114
11826	0.56	0.15	-1.90046	1.6491e-06	5.51052e-07	Aqp1	GO:0071705//nitrogen compound transport;GO:0071702//organic substance transport;GO:0007423//sensory organ development;GO:0032501//multicellular organismal process;GO:0015696//ammonium transport;GO:0051234//establishment of localization;GO:0072488//ammonium transmembrane transport;GO:0090596//sensory organ morphogenesis;GO:0009887//animal organ morphogenesis;GO:0009653//anatomical structure morpho…	K09864//aquaporin-1+ko04976//Bile secretion+ko04964//Proximal tubule bicarbonate reclamation+ko04924//Renin secretion
74187	3.32	0.89	-1.89931	4.34271e-31	4.05922e-32	Katnb1	GO:0010976//positive regulation of neuron projection development;GO:0031111//negative regulation of microtubule polymerization or depolymerization;GO:0070507//regulation of microtubule cytoskeleton organization;GO:0007399//nervous system development;GO:0048869//cellular developmental process;GO:0048699//generation of neurons;GO:0051495//positive regulation of cytoskeleton organization;GO:0051493/…	K18643//katanin p80 WD40 repeat-containing subunit B1;K18643//katanin p80 WD40 repeat-containing subunit B1;K18643//katanin p80 WD40 repeat-containing subunit B1
107338	2.75	0.74	-1.89383	7.38803e-55	3.7278e-56	Gbf1	GO:0051716//cellular response to stimulus;GO:0048308//organelle inheritance;GO:0051704//multi-organism process;GO:0048193//Golgi vesicle transport;GO:0051726//regulation of cell cycle;GO:0060341//regulation of cellular localization;GO:1902531//regulation of intracellular signal transduction;GO:0065007//biological regulation;GO:0050789//regulation of biological process;GO:0051674//localization of …	K18443//golgi-specific brefeldin A-resistance guanine nucleotide exchange factor 1+ko04144//Endocytosis;K18443//golgi-specific brefeldin A-resistance guanine nucleotide exchange factor 1+ko04144//Endocytosis
22648	0.52	0.14	-1.89308	3.55382e-08	1.0342e-08	Zfp11	GO:0044464//cell part;GO:0044424//intracellular part;GO:0043227//membrane-bounded organelle;GO:0005634//nucleus;GO:0005623//cell;GO:0043229//intracellular organelle;GO:0043231//intracellular membrane-bounded organelle;GO:0043226//organelle;GO:0005622//intracellular;GO:0097159//organic cyclic compound binding;GO:0043169//cation binding;GO:0003676//nucleic acid binding;GO:1901363//heterocyclic comp…	K09228//KRAB domain-containing zinc finger protein
58231	2.36	0.64	-1.88264	3.33737e-32	2.99742e-33	Stk4	GO:0046777//protein autophosphorylation;GO:0048534//hematopoietic or lymphoid organ development;GO:0031399//regulation of protein modification process;GO:0061138//morphogenesis of a branching epithelium;GO:0071840//cellular component organization or biogenesis;GO:0043170//macromolecule metabolic process;GO:0008219//cell death;GO:0030178//negative regulation of Wnt signaling pathway;GO:0060706//ce…	K04411//serine/threonine kinase 4+ko05223//Non-small cell lung cancer+ko05200//Pathways in cancer+ko04010//MAPK signaling pathway+ko04014//Ras signaling pathway+ko04068//FoxO signaling pathway
22225	3.39	0.92	-1.88158	9.78812e-39	7.22302e-40	Usp5	GO:0032434//regulation of proteasomal ubiquitin-dependent protein catabolic process;GO:0006464//cellular protein modification process;GO:0009893//positive regulation of metabolic process;GO:0044267//cellular protein metabolic process;GO:0006508//proteolysis;GO:1903362//regulation of cellular protein catabolic process;GO:0009987//cellular process;GO:0008152//metabolic process;GO:0019538//protein m…	K11836//ubiquitin carboxyl-terminal hydrolase 5/13 [EC:3.4.19.12];K11836//ubiquitin carboxyl-terminal hydrolase 5/13 [EC:3.4.19.12];K11836//ubiquitin carboxyl-terminal hydrolase 5/13 [EC:3.4.19.12]
233064	1.8	0.49	-1.87714	4.21248e-31	3.93218e-32	Wdr62	GO:0022402//cell cycle process;GO:0007420//brain development;GO:0070925//organelle assembly;GO:0031023//microtubule organizing center organization;GO:0048856//anatomical structure development;GO:0007017//microtubule-based process;GO:1903047//mitotic cell cycle process;GO:0000278//mitotic cell cycle;GO:0071840//cellular component organization or biogenesis;GO:0007010//cytoskeleton organization;GO:…	K21762//WD repeat-containing protein 62;K21762//WD repeat-containing protein 62;K21762//WD repeat-containing protein 62;K21762//WD repeat-containing protein 62;K21762//WD repeat-containing protein 62
321008	0.33	0.09	-1.87447	0.000102054	4.18192e-05	6330408A02Rik	GO:0043170//macromolecule metabolic process;GO:0032502//developmental process;GO:1901575//organic substance catabolic process;GO:0044267//cellular protein metabolic process;GO:0030154//cell differentiation;GO:1901564//organonitrogen compound metabolic process;GO:0043632//modification-dependent macromolecule catabolic process;GO:0019941//modification-dependent protein catabolic process;GO:0006511/…
BGI_novel_G000663	2.2	0.6	-1.87447	2.38249e-05	9.03256e-06	BGI_novel_G000663	GO:0080090//regulation of primary metabolic process;GO:0065007//biological regulation;GO:0045950//negative regulation of mitotic recombination;GO:0031326//regulation of cellular biosynthetic process;GO:0016070//RNA metabolic process;GO:0006259//DNA metabolic process;GO:0019438//aromatic compound biosynthetic process;GO:0006996//organelle organization;GO:0051704//multi-organism process;GO:0007565/…	K09230//SCAN domain-containing zinc finger protein
246696	2.05	0.56	-1.87213	6.75334e-10	1.70633e-10	Slc25a28	GO:0055080//cation homeostasis;GO:0006811//ion transport;GO:0055065//metal ion homeostasis;GO:0000041//transition metal ion transport;GO:0051179//localization;GO:0048878//chemical homeostasis;GO:0030001//metal ion transport;GO:0048250//mitochondrial iron ion transport;GO:0098771//inorganic ion homeostasis;GO:0006839//mitochondrial transport;GO:0050801//ion homeostasis;GO:0065007//biological regul…	K15113//solute carrier family 25 (mitochondrial iron transporter), member 28/37;K15113//solute carrier family 25 (mitochondrial iron transporter), member 28/37;K15113//solute carrier family 25 (mitochondrial iron transporter), member 28/37
BGI_novel_G000302	1.68	0.46	-1.86876	6.95565e-08	2.06454e-08	BGI_novel_G000302	GO:0006812//cation transport;GO:0051234//establishment of localization;GO:0006810//transport;GO:0051179//localization;GO:0006818//hydrogen transport;GO:0006811//ion transport;GO:0015992//proton transport;GO:0015672//monovalent inorganic cation transport;GO:0030658//transport vesicle membrane;GO:0070382//exocytic vesicle;GO:0098805//whole membrane;GO:0044424//intracellular part;GO:0005774//vacuola…	K02152//V-type H+-transporting ATPase subunit G+ko04145//Phagosome+ko04721//Synaptic vesicle cycle+ko05323//Rheumatoid arthritis+ko00190//Oxidative phosphorylation+ko05110//Vibrio cholerae infection+ko04150//mTOR signaling pathway+ko05120//Epithelial cell signaling in Helicobacter pylori infection+ko04966//Collecting duct acid secretion+ko01100//Metabolic pathways+ko05165//Human papillomavirus in…
56504	0.62	0.17	-1.86673	3.23332e-05	1.2452e-05	Srpk3	GO:0051252//regulation of RNA metabolic process;GO:0006793//phosphorus metabolic process;GO:0006807//nitrogen compound metabolic process;GO:0000377//RNA splicing, via transesterification reactions with bulged adenosine as nucleophile;GO:0031323//regulation of cellular metabolic process;GO:0048513//animal organ development;GO:0022607//cellular component assembly;GO:0000375//RNA splicing, via trans…	K08832//serine/threonine-protein kinase SRPK3 [EC:2.7.11.1];K08832//serine/threonine-protein kinase SRPK3 [EC:2.7.11.1]
18605	0.29	0.08	-1.85798	6.95417e-08	2.06454e-08	Enpp1	GO:0051174//regulation of phosphorus metabolic process;GO:0032868//response to insulin;GO:0030643//cellular phosphate ion homeostasis;GO:1901564//organonitrogen compound metabolic process;GO:0007275//multicellular organism development;GO:0030002//cellular anion homeostasis;GO:0051235//maintenance of location;GO:0009143//nucleoside triphosphate catabolic process;GO:0023057//negative regulation of …	K01513//ectonucleotide pyrophosphatase/phosphodiesterase family member 1/3 [EC:3.1.4.1 3.6.1.9]+ko00230//Purine metabolism+ko00770//Pantothenate and CoA biosynthesis+ko00240//Pyrimidine metabolism+ko00760//Nicotinate and nicotinamide metabolism+ko00500//Starch and sucrose metabolism+ko00740//Riboflavin metabolism+ko01100//Metabolic pathways;K01513//ectonucleotide pyrophosphatase/phosphodiesterase…
67102	0.29	0.08	-1.85798	5.82301e-07	1.86792e-07	D16Ertd472e	GO:0048731//system development;GO:0120035//regulation of plasma membrane bounded cell projection organization;GO:0010720//positive regulation of cell development;GO:0050773//regulation of dendrite development;GO:0048513//animal organ development;GO:0007420//brain development;GO:0021953//central nervous system neuron differentiation;GO:0060998//regulation of dendritic spine development;GO:0051960/…
75050	0.58	0.16	-1.85798	6.55516e-10	1.65419e-10	Kif27	GO:0007399//nervous system development;GO:0022607//cellular component assembly;GO:0007420//brain development;GO:0007275//multicellular organism development;GO:0032502//developmental process;GO:0007018//microtubule-based movement;GO:0060271//cilium assembly;GO:0021591//ventricular system development;GO:0060322//head development;GO:0120031//plasma membrane bounded cell projection assembly;GO:004873…	K10395//kinesin family member 4/21/27;K10395//kinesin family member 4/21/27
67417	2.21	0.61	-1.85717	2.29078e-21	3.08038e-22	Ears2	GO:0046483//heterocycle metabolic process;GO:0034641//cellular nitrogen compound metabolic process;GO:0043436//oxoacid metabolic process;GO:1901576//organic substance biosynthetic process;GO:1901566//organonitrogen compound biosynthetic process;GO:0043603//cellular amide metabolic process;GO:0043043//peptide biosynthetic process;GO:0043039//tRNA aminoacylation;GO:0071704//organic substance metabo…	K01885//glutamyl-tRNA synthetase [EC:6.1.1.17]+ko00860//Porphyrin and chlorophyll metabolism+ko00970//Aminoacyl-tRNA biosynthesis+ko01100//Metabolic pathways;K01885//glutamyl-tRNA synthetase [EC:6.1.1.17]+ko00860//Porphyrin and chlorophyll metabolism+ko00970//Aminoacyl-tRNA biosynthesis+ko01100//Metabolic pathways
192198	0.94	0.26	-1.85415	6.18844e-13	1.27399e-13	Lrrc4	GO:0065008//regulation of biological quality;GO:0010648//negative regulation of cell communication;GO:0009968//negative regulation of signal transduction;GO:0009987//cellular process;GO:0071840//cellular component organization or biogenesis;GO:0051641//cellular localization;GO:0070727//cellular macromolecule localization;GO:0070887//cellular response to chemical stimulus;GO:0065009//regulation of…	K16351//netrin-G2 ligand+ko04360//Axon guidance+ko04514//Cell adhesion molecules (CAMs)
67590	0.94	0.26	-1.85415	6.55352e-10	1.65419e-10	Tctn3	GO:0120031//plasma membrane bounded cell projection assembly;GO:0051716//cellular response to stimulus;GO:0050794//regulation of cellular process;GO:0022607//cellular component assembly;GO:0120036//plasma membrane bounded cell projection organization;GO:0006996//organelle organization;GO:0007154//cell communication;GO:0043065//positive regulation of apoptotic process;GO:0030031//cell projection a…	K19382//tectonic-1/3
112403	2.53	0.7	-1.85371	1.62733e-14	3.04426e-15	Dxo	GO:0044248//cellular catabolic process;GO:0016071//mRNA metabolic process;GO:0010605//negative regulation of macromolecule metabolic process;GO:0071028//nuclear mRNA surveillance;GO:0060255//regulation of macromolecule metabolic process;GO:0006139//nucleobase-containing compound metabolic process;GO:0019222//regulation of metabolic process;GO:0031329//regulation of cellular catabolic process;GO:0…	K14845//RAT1-interacting protein;K14845//RAT1-interacting protein;K14845//RAT1-interacting protein
245857	0.65	0.18	-1.85244	5.82415e-07	1.86792e-07	Ssh3	GO:0007399//nervous system development;GO:0048856//anatomical structure development;GO:0010769//regulation of cell morphogenesis involved in differentiation;GO:0032502//developmental process;GO:0048699//generation of neurons;GO:0065008//regulation of biological quality;GO:0031344//regulation of cell projection organization;GO:0050770//regulation of axonogenesis;GO:1902903//regulation of supramole…	K05766//protein phosphatase slingshot [EC:3.1.3.16 3.1.3.48]+ko04360//Axon guidance+ko04810//Regulation of actin cytoskeleton
108961	0.36	0.1	-1.848	3.23385e-05	1.2452e-05	E2f8	GO:0060717//chorion development;GO:1902680//positive regulation of RNA biosynthetic process;GO:0045740//positive regulation of DNA replication;GO:0032465//regulation of cytokinesis;GO:0045787//positive regulation of cell cycle;GO:0010558//negative regulation of macromolecule biosynthetic process;GO:0065007//biological regulation;GO:0001889//liver development;GO:2000112//regulation of cellular mac…	K09391//transcription factor E2F7/8
13806	6.26	1.74	-1.84708	2.70827e-39	1.97974e-40	Eno1	GO:0031328//positive regulation of cellular biosynthetic process;GO:0023051//regulation of signaling;GO:0043207//response to external biotic stimulus;GO:0045862//positive regulation of proteolysis;GO:0009144//purine nucleoside triphosphate metabolic process;GO:1902532//negative regulation of intracellular signal transduction;GO:1901575//organic substance catabolic process;GO:0019362//pyridine nuc…	K01689//enolase [EC:4.2.1.11]+ko01200//Carbon metabolism+ko00010//Glycolysis / Gluconeogenesis+ko01230//Biosynthesis of amino acids+ko03018//RNA degradation+ko01100//Metabolic pathways+ko04066//HIF-1 signaling pathway;K01689//enolase [EC:4.2.1.11]+ko01200//Carbon metabolism+ko00010//Glycolysis / Gluconeogenesis+ko01230//Biosynthesis of amino acids+ko03018//RNA degradation+ko01100//Metabolic pathw…
74761	3.09	0.86	-1.8452	6.18575e-19	9.31276e-20	Mxra8	GO:0030154//cell differentiation;GO:0048856//anatomical structure development;GO:0009987//cellular process;GO:0010001//glial cell differentiation;GO:0007399//nervous system development;GO:0042063//gliogenesis;GO:0048869//cellular developmental process;GO:0007275//multicellular organism development;GO:0022008//neurogenesis;GO:0060856//establishment of blood-brain barrier;GO:0048468//cell developme…	K02353//segment polarity protein dishevelled+ko04390//Hippo signaling pathway+ko05226//Gastric cancer+ko05225//Hepatocellular carcinoma+ko04916//Melanogenesis+ko04550//Signaling pathways regulating pluripotency of stem cells+ko04310//Wnt signaling pathway+ko05217//Basal cell carcinoma+ko05200//Pathways in cancer+ko05224//Breast cancer+ko04934//Cushing's syndrome+ko04150//mTOR signaling pathway+ko…
212547	1.47	0.41	-1.84212	1.35986e-19	1.97354e-20	Nepro	GO:0051239//regulation of multicellular organismal process;GO:0023056//positive regulation of signaling;GO:0022008//neurogenesis;GO:0048523//negative regulation of cellular process;GO:0008593//regulation of Notch signaling pathway;GO:0050768//negative regulation of neurogenesis;GO:0051241//negative regulation of multicellular organismal process;GO:0060284//regulation of cell development;GO:001064…
546134	1.86	0.52	-1.83872	7.27599e-16	1.27209e-16	Gramd2	GO:0016020//membrane;GO:0016021//integral component of membrane;GO:0044425//membrane part;GO:0031224//intrinsic component of membrane;	K22641//protein tweety
214952	3.25	0.91	-1.8365	3.77611e-32	3.39624e-33	Rhot2	GO:0065007//biological regulation;GO:0007005//mitochondrion organization;GO:0007165//signal transduction;GO:0035794//positive regulation of mitochondrial membrane permeability;GO:0010970//transport along microtubule;GO:0006810//transport;GO:0061024//membrane organization;GO:0051649//establishment of localization in cell;GO:0050789//regulation of biological process;GO:0050896//response to stimulus…	K07871//mitochondrial Rho GTPase 2 [EC:3.6.5.-]+ko04137//Mitophagy - animal
78921	0.25	0.07	-1.8365	0.000241856	0.000104324	9130019O22Rik	GO:0010556//regulation of macromolecule biosynthetic process;GO:0019219//regulation of nucleobase-containing compound metabolic process;GO:0050794//regulation of cellular process;GO:0019222//regulation of metabolic process;GO:2000112//regulation of cellular macromolecule biosynthetic process;GO:0031326//regulation of cellular biosynthetic process;GO:0051171//regulation of nitrogen compound metabo…	K09228//KRAB domain-containing zinc finger protein
18641	1.32	0.37	-1.83494	3.04248e-15	5.46706e-16	Pfkl	GO:0030388//fructose 1,6-bisphosphate metabolic process;GO:0034641//cellular nitrogen compound metabolic process;GO:0046496//nicotinamide nucleotide metabolic process;GO:0051289//protein homotetramerization;GO:0051046//regulation of secretion;GO:0071704//organic substance metabolic process;GO:0065008//regulation of biological quality;GO:0065007//biological regulation;GO:0055086//nucleobase-contai…	K00850//6-phosphofructokinase 1 [EC:2.7.1.11]+ko01200//Carbon metabolism+ko00010//Glycolysis / Gluconeogenesis+ko01230//Biosynthesis of amino acids+ko00052//Galactose metabolism+ko00051//Fructose and mannose metabolism+ko03018//RNA degradation+ko04152//AMPK signaling pathway+ko00030//Pentose phosphate pathway+ko05230//Central carbon metabolism in cancer+ko01100//Metabolic pathways
18999	1.92	0.54	-1.83007	5.82186e-07	1.86792e-07	Pou5f1	GO:0048589//developmental growth;GO:0001759//organ induction;GO:0071773//cellular response to BMP stimulus;GO:0031128//developmental induction;GO:0009987//cellular process;GO:0043009//chordate embryonic development;GO:0051252//regulation of RNA metabolic process;GO:0045165//cell fate commitment;GO:0032501//multicellular organismal process;GO:0003130//BMP signaling pathway involved in heart induct…	K09367//POU domain transcription factor, class 5+ko04550//Signaling pathways regulating pluripotency of stem cells
320534	0.64	0.18	-1.83007	3.79526e-11	8.76584e-12	Tmem104	GO:0016020//membrane;GO:0044425//membrane part;GO:0031224//intrinsic component of membrane;GO:0016021//integral component of membrane;	K01069//hydroxyacylglutathione hydrolase [EC:3.1.2.6]+ko00620//Pyruvate metabolism;K21125//mucin-5AC+ko04657//IL-17 signaling pathway
553127	1.6	0.45	-1.83007	1.83944e-07	5.65812e-08	Cxx1b
74370	1.42	0.4	-1.82782	1.19727e-06	3.94182e-07	Rptor	GO:1902533//positive regulation of intracellular signal transduction;GO:0001558//regulation of cell growth;GO:0043201//response to leucine;GO:0010564//regulation of cell cycle process;GO:0070201//regulation of establishment of protein localization;GO:0010604//positive regulation of macromolecule metabolic process;GO:0009987//cellular process;GO:1901989//positive regulation of cell cycle phase tra…	K07204//regulatory associated protein of mTOR+ko04140//Autophagy - animal+ko04211//Longevity regulating pathway+ko04213//Longevity regulating pathway - multiple species+ko04910//Insulin signaling pathway+ko04136//Autophagy - other+ko04714//Thermogenesis+ko05206//MicroRNAs in cancer+ko04152//AMPK signaling pathway+ko04151//PI3K-Akt signaling pathway+ko04150//mTOR signaling pathway;K07204//regulato…
72500	0.78	0.22	-1.82597	5.23174e-05	2.06036e-05	Ier5l		K16628//collagen, type VII, alpha+ko04974//Protein digestion and absorption
13618	0.99	0.28	-1.822	4.94605e-10	1.23971e-10	Ednrb	GO:0030595//leukocyte chemotaxis;GO:0048856//anatomical structure development;GO:2000021//regulation of ion homeostasis;GO:0050794//regulation of cellular process;GO:0045595//regulation of cell differentiation;GO:0009892//negative regulation of metabolic process;GO:0007275//multicellular organism development;GO:0050768//negative regulation of neurogenesis;GO:0014033//neural crest cell differentia…	K04198//endothelin receptor type B+ko04022//cGMP-PKG signaling pathway+ko04020//Calcium signaling pathway+ko04916//Melanogenesis+ko05200//Pathways in cancer+ko04080//Neuroactive ligand-receptor interaction+ko04926//Relaxin signaling pathway
58202	3.1	0.88	-1.81669	4.45769e-28	4.61092e-29	Nelfb	GO:0045934//negative regulation of nucleobase-containing compound metabolic process;GO:0050789//regulation of biological process;GO:2000112//regulation of cellular macromolecule biosynthetic process;GO:0065007//biological regulation;GO:0031323//regulation of cellular metabolic process;GO:0019222//regulation of metabolic process;GO:0051172//negative regulation of nitrogen compound metabolic proces…	K15180//negative elongation factor B;K15180//negative elongation factor B
74211	1.76	0.5	-1.81558	1.59061e-30	1.51687e-31	1700017B05Rik	GO:0005737//cytoplasm;GO:0044444//cytoplasmic part;GO:0044424//intracellular part;GO:0005623//cell;GO:0005829//cytosol;GO:0005622//intracellular;GO:0044464//cell part;	K09993//cyclin-dependent kinase inhibitor 1C+ko04110//Cell cycle;K10955//mucin-2+ko05226//Gastric cancer+ko05146//Amoebiasis;K09993//cyclin-dependent kinase inhibitor 1C+ko04110//Cell cycle;K10955//mucin-2+ko05226//Gastric cancer+ko05146//Amoebiasis
11632	23.1	6.57	-1.81393	7.10799e-92	1.96809e-93	Aip	GO:0048583//regulation of response to stimulus;GO:0065007//biological regulation;GO:0043170//macromolecule metabolic process;GO:0006839//mitochondrial transport;GO:0050790//regulation of catalytic activity;GO:0044092//negative regulation of molecular function;GO:0006626//protein targeting to mitochondrion;GO:0051641//cellular localization;GO:0044238//primary metabolic process;GO:0070887//cellular…	K17767//AH receptor-interacting protein+ko04934//Cushing's syndrome
233913	2.42	0.69	-1.81034	9.94055e-20	1.43136e-20	BC017158	GO:0016020//membrane;GO:0031224//intrinsic component of membrane;GO:0044425//membrane part;GO:0016021//integral component of membrane;	K10696//E3 ubiquitin-protein ligase BRE1 [EC:2.3.2.27];K14382//solute carrier family 5 (sodium/glucose cotransporter), member 2
104923	0.84	0.24	-1.80735	1.36597e-05	5.03484e-06	Adi1	GO:0009058//biosynthetic process;GO:1901564//organonitrogen compound metabolic process;GO:0008652//cellular amino acid biosynthetic process;GO:0071267//L-methionine salvage;GO:0008152//metabolic process;GO:0000096//sulfur amino acid metabolic process;GO:0009066//aspartate family amino acid metabolic process;GO:0006807//nitrogen compound metabolic process;GO:0071704//organic substance metabolic pr…	K08967//1,2-dihydroxy-3-keto-5-methylthiopentene dioxygenase [EC:1.13.11.53 1.13.11.54]+ko01100//Metabolic pathways+ko00270//Cysteine and methionine metabolism
15273	0.21	0.06	-1.80735	3.29031e-08	9.53164e-09	Hivep2	GO:0032501//multicellular organismal process;GO:0007165//signal transduction;GO:0006725//cellular aromatic compound metabolic process;GO:0019438//aromatic compound biosynthetic process;GO:1901362//organic cyclic compound biosynthetic process;GO:0046483//heterocycle metabolic process;GO:0044237//cellular metabolic process;GO:1901576//organic substance biosynthetic process;GO:0044271//cellular nitr…	K09239//human immunodeficiency virus type I enhancer-binding protein
22421	0.56	0.16	-1.80735	3.5958e-07	1.13306e-07	Wnt7a	GO:0008284//positive regulation of cell proliferation;GO:0061028//establishment of endothelial barrier;GO:0048870//cell motility;GO:0030855//epithelial cell differentiation;GO:0099177//regulation of trans-synaptic signaling;GO:0010634//positive regulation of epithelial cell migration;GO:0106027//neuron projection organization;GO:0060429//epithelium development;GO:0051234//establishment of localiz…	K00572//wingless-type MMTV integration site family, member 7+ko04390//Hippo signaling pathway+ko05226//Gastric cancer+ko05225//Hepatocellular carcinoma+ko04916//Melanogenesis+ko04550//Signaling pathways regulating pluripotency of stem cells+ko04310//Wnt signaling pathway+ko05217//Basal cell carcinoma+ko05200//Pathways in cancer+ko05205//Proteoglycans in cancer+ko05224//Breast cancer+ko04934//Cush…
56077	0.56	0.16	-1.80735	0.000320594	0.000140531	Dgke	GO:0035556//intracellular signal transduction;GO:0071704//organic substance metabolic process;GO:0016310//phosphorylation;GO:0006793//phosphorus metabolic process;GO:0007205//protein kinase C-activating G-protein coupled receptor signaling pathway;GO:0030258//lipid modification;GO:0050789//regulation of biological process;GO:0023052//signaling;GO:0065007//biological regulation;GO:0044237//cellula…	K00901//diacylglycerol kinase (ATP) [EC:2.7.1.107]+ko04070//Phosphatidylinositol signaling system+ko04072//Phospholipase D signaling pathway+ko00564//Glycerophospholipid metabolism+ko00561//Glycerolipid metabolism+ko05231//Choline metabolism in cancer+ko01100//Metabolic pathways
94088	1.12	0.32	-1.80735	8.71905e-15	1.60853e-15	Trim6	GO:2000736//regulation of stem cell differentiation;GO:0010605//negative regulation of macromolecule metabolic process;GO:0043933//macromolecular complex subunit organization;GO:0010558//negative regulation of macromolecule biosynthetic process;GO:0032880//regulation of protein localization;GO:0042327//positive regulation of phosphorylation;GO:0048519//negative regulation of biological process;GO…	K11999//tripartite motif-containing protein 6/22/34;K11999//tripartite motif-containing protein 6/22/34;K11999//tripartite motif-containing protein 6/22/34;K11999//tripartite motif-containing protein 6/22/34
106707	1.85	0.53	-1.80346	5.5158e-11	1.28615e-11	Rpusd1	GO:0043170//macromolecule metabolic process;GO:0016072//rRNA metabolic process;GO:0071840//cellular component organization or biogenesis;GO:0008033//tRNA processing;GO:0006139//nucleobase-containing compound metabolic process;GO:0090304//nucleic acid metabolic process;GO:0044238//primary metabolic process;GO:0043412//macromolecule modification;GO:0000455//enzyme-directed rRNA pseudouridine synthe…	K22538//mitochondrial RNA pseudouridine synthase RPUSD4 [EC:5.4.99.-]
101706	1.36	0.39	-1.80206	1.74728e-32	1.55718e-33	Numa1	GO:0045684//positive regulation of epidermis development;GO:1904776//regulation of protein localization to cell cortex;GO:0031113//regulation of microtubule polymerization;GO:0048869//cellular developmental process;GO:0048518//positive regulation of biological process;GO:0051321//meiotic cell cycle;GO:0007088//regulation of mitotic nuclear division;GO:0090068//positive regulation of cell cycle pr…	K16808//nuclear mitotic apparatus protein 1
76308	6.9	1.98	-1.8011	1.35203e-41	9.34612e-43	Rab1b		K07875//Ras-related protein Rab-1B+ko05134//Legionellosis
170731	0.8	0.23	-1.79837	7.65171e-13	1.58343e-13	Mfn2	GO:0010821//regulation of mitochondrion organization;GO:0009987//cellular process;GO:0009968//negative regulation of signal transduction;GO:0022607//cellular component assembly;GO:0007275//multicellular organism development;GO:0071702//organic substance transport;GO:0001824//blastocyst development;GO:0034613//cellular protein localization;GO:0051056//regulation of small GTPase mediated signal tra…	K06030//mitofusin 2 [EC:3.6.5.-]+ko04214//Apoptosis - fly+ko04137//Mitophagy - animal+ko04621//NOD-like receptor signaling pathway
BGI_novel_G000387	2.08	0.6	-1.79355	2.00036e-25	2.27856e-26	BGI_novel_G000387		K03234//elongation factor 2+ko04152//AMPK signaling pathway+ko04921//Oxytocin signaling pathway
69309	3.88	1.12	-1.79256	4.74237e-33	4.15462e-34	Slc16a13	GO:0051234//establishment of localization;GO:0006811//ion transport;GO:0006820//anion transport;GO:0015849//organic acid transport;GO:0051179//localization;GO:0015718//monocarboxylic acid transport;GO:0006810//transport;GO:0046942//carboxylic acid transport;GO:0015711//organic anion transport;GO:0071702//organic substance transport;GO:0016020//membrane;GO:0043227//membrane-bounded organelle;GO:00…	K08189//MFS transporter, MCP family, solute carrier family 16 (monocarboxylic acid transporters), member 13;K22648//B-cell CLL/lymphoma 6 member B protein
106947	0.45	0.13	-1.79141	1.50895e-06	5.01938e-07	Slc39a3	GO:0000902//cell morphogenesis;GO:0007275//multicellular organism development;GO:0006810//transport;GO:0006812//cation transport;GO:0098655//cation transmembrane transport;GO:0002260//lymphocyte homeostasis;GO:0048869//cellular developmental process;GO:0048736//appendage development;GO:0048598//embryonic morphogenesis;GO:0009987//cellular process;GO:0071840//cellular component organization or bio…	K14709//solute carrier family 39 (zinc transporter), member 1/2/3;K14709//solute carrier family 39 (zinc transporter), member 1/2/3
11610	0.45	0.13	-1.79141	4.80579e-07	1.52918e-07	Agtrap	GO:0065007//biological regulation;GO:0006950//response to stress;GO:0001666//response to hypoxia;GO:0008015//blood circulation;GO:0050896//response to stimulus;GO:0008217//regulation of blood pressure;GO:0009628//response to abiotic stimulus;GO:0036293//response to decreased oxygen levels;GO:0070482//response to oxygen levels;GO:0003013//circulatory system process;GO:0065008//regulation of biolog…	K14435//chromodomain-helicase-DNA-binding protein 5 [EC:3.6.4.12]
14732	0.45	0.13	-1.79141	8.7675e-12	1.93156e-12	Gpam	GO:0009605//response to external stimulus;GO:0051186//cofactor metabolic process;GO:0032501//multicellular organismal process;GO:0006790//sulfur compound metabolic process;GO:0070235//regulation of activation-induced cell death of T cells;GO:0050670//regulation of lymphocyte proliferation;GO:0002683//negative regulation of immune system process;GO:0002682//regulation of immune system process;GO:0…	K00629//glycerol-3-phosphate O-acyltransferase 1/2 [EC:2.3.1.15]+ko00564//Glycerophospholipid metabolism+ko00561//Glycerolipid metabolism+ko01100//Metabolic pathways
20907	0.45	0.13	-1.79141	0.00032064	0.000140531	Stx1a	GO:0032386//regulation of intracellular transport;GO:1902803//regulation of synaptic vesicle transport;GO:0071840//cellular component organization or biogenesis;GO:0098916//anterograde trans-synaptic signaling;GO:0043933//macromolecular complex subunit organization;GO:0035493//SNARE complex assembly;GO:0010817//regulation of hormone levels;GO:1903305//regulation of regulated secretory pathway;GO:…	K04560//syntaxin 1A+ko04911//Insulin secretion+ko04130//SNARE interactions in vesicular transport+ko04721//Synaptic vesicle cycle+ko05031//Amphetamine addiction
77832	1.66	0.48	-1.79008	7.0951e-16	1.24002e-16	Tchp	GO:0009987//cellular process;GO:0051128//regulation of cellular component organization;GO:0001558//regulation of cell growth;GO:0008219//cell death;GO:0044087//regulation of cellular component biogenesis;GO:0048523//negative regulation of cellular process;GO:1902115//regulation of organelle assembly;GO:0030308//negative regulation of cell growth;GO:0071840//cellular component organization or biog…	K16811//trichoplein keratin filament-binding protein;K16811//trichoplein keratin filament-binding protein;K16811//trichoplein keratin filament-binding protein;K16811//trichoplein keratin filament-binding protein
60363	4.87	1.41	-1.78823	4.98716e-30	4.8346e-31	Cldn15	GO:0098609//cell-cell adhesion;GO:0016338//calcium-independent cell-cell adhesion via plasma membrane cell-adhesion molecules;GO:0051234//establishment of localization;GO:0006811//ion transport;GO:0006810//transport;GO:0007155//cell adhesion;GO:0022610//biological adhesion;GO:0098742//cell-cell adhesion via plasma-membrane adhesion molecules;GO:0051179//localization;GO:0044464//cell part;GO:00701…	K06087//claudin+ko04514//Cell adhesion molecules (CAMs)+ko04530//Tight junction+ko04670//Leukocyte transendothelial migration+ko05160//Hepatitis C
68347	1.31	0.38	-1.7855	0.000320547	0.000140531	0610011F06Rik		K00728//dolichyl-phosphate-mannose-protein mannosyltransferase [EC:2.4.1.109]+ko00515//Mannose type O-glycan biosynthesis+ko00514//Other types of O-glycan biosynthesis+ko01100//Metabolic pathways;K19938//rabphilin-3A;K15001//cytochrome P450 family 4 [EC:1.14.-.-]
26895	3.72	1.08	-1.78427	1.79536e-24	2.12884e-25	Cops7b	GO:0000338//protein deneddylation;GO:0006508//proteolysis;GO:1901564//organonitrogen compound metabolic process;GO:0019538//protein metabolic process;GO:0044237//cellular metabolic process;GO:0044260//cellular macromolecule metabolic process;GO:0006807//nitrogen compound metabolic process;GO:0043170//macromolecule metabolic process;GO:0044238//primary metabolic process;GO:0043412//macromolecule m…	K12180//COP9 signalosome complex subunit 7
396184	0.31	0.09	-1.78427	1.19e-10	2.8506e-11	Flrt1	GO:0050803//regulation of synapse structure or activity;GO:0031323//regulation of cellular metabolic process;GO:0009719//response to endogenous stimulus;GO:0016358//dendrite development;GO:0042326//negative regulation of phosphorylation;GO:0030182//neuron differentiation;GO:0048468//cell development;GO:0065007//biological regulation;GO:0019222//regulation of metabolic process;GO:0009987//cellular…	K16362//leucine-rich repeat transmembrane protein FLRT
55992	0.93	0.27	-1.78427	1.54321e-09	4.0072e-10	Trim3	GO:0015031//protein transport;GO:0006464//cellular protein modification process;GO:0033036//macromolecule localization;GO:0071702//organic substance transport;GO:0036211//protein modification process;GO:0070647//protein modification by small protein conjugation or removal;GO:0008152//metabolic process;GO:0006810//transport;GO:0044237//cellular metabolic process;GO:0019538//protein metabolic proce…	K11997//tripartite motif-containing protein 2/3;K11997//tripartite motif-containing protein 2/3;K11997//tripartite motif-containing protein 2/3;K11997//tripartite motif-containing protein 2/3;K11997//tripartite motif-containing protein 2/3;K11997//tripartite motif-containing protein 2/3
211535	4.92	1.43	-1.78264	6.76882e-42	4.64916e-43	Ccdc114	GO:0030030//cell projection organization;GO:0001578//microtubule bundle formation;GO:0006996//organelle organization;GO:0016043//cellular component organization;GO:0065003//macromolecular complex assembly;GO:0035082//axoneme assembly;GO:0060271//cilium assembly;GO:0044782//cilium organization;GO:0044085//cellular component biogenesis;GO:0007018//microtubule-based movement;GO:0120036//plasma membr…	K21110//cingulin-like protein 1+ko04530//Tight junction;K18626//trichohyalin;K10421//CAP-Gly domain-containing linker protein 1+ko04150//mTOR signaling pathway;K21110//cingulin-like protein 1+ko04530//Tight junction;K10421//CAP-Gly domain-containing linker protein 1+ko04150//mTOR signaling pathway;K10352//myosin heavy chain+ko04530//Tight junction
233863	1.34	0.39	-1.78069	1.77457e-31	1.63298e-32	Gtf3c1	GO:0034645//cellular macromolecule biosynthetic process;GO:0032774//RNA biosynthetic process;GO:0034654//nucleobase-containing compound biosynthetic process;GO:0044249//cellular biosynthetic process;GO:0008152//metabolic process;GO:0043170//macromolecule metabolic process;GO:0006383//transcription from RNA polymerase III promoter;GO:0006807//nitrogen compound metabolic process;GO:0009987//cellula…	K15199//general transcription factor 3C polypeptide 1
18971	0.79	0.23	-1.78022	6.01833e-10	1.51606e-10	Pold1	GO:0071482//cellular response to light stimulus;GO:0006725//cellular aromatic compound metabolic process;GO:0009416//response to light stimulus;GO:0006289//nucleotide-excision repair;GO:0006807//nitrogen compound metabolic process;GO:0034645//cellular macromolecule biosynthetic process;GO:0055088//lipid homeostasis;GO:0018130//heterocycle biosynthetic process;GO:0071897//DNA biosynthetic process;…	K02327//DNA polymerase delta subunit 1 [EC:2.7.7.7]+ko03420//Nucleotide excision repair+ko03030//DNA replication+ko00230//Purine metabolism+ko00240//Pyrimidine metabolism+ko03410//Base excision repair+ko03440//Homologous recombination+ko03430//Mismatch repair+ko01100//Metabolic pathways+ko05166//HTLV-I infection
12977	2.46	0.72	-1.77259	8.04013e-24	9.83274e-25	Csf1	GO:0034097//response to cytokine;GO:0006950//response to stress;GO:2000027//regulation of organ morphogenesis;GO:0080090//regulation of primary metabolic process;GO:0048699//generation of neurons;GO:1903969//regulation of response to macrophage colony-stimulating factor;GO:0023052//signaling;GO:1904139//regulation of microglial cell migration;GO:0060560//developmental growth involved in morphogen…	K05453//macrophage colony-stimulating factor 1+ko04640//Hematopoietic cell lineage+ko04380//Osteoclast differentiation+ko04668//TNF signaling pathway+ko05323//Rheumatoid arthritis+ko04151//PI3K-Akt signaling pathway+ko04010//MAPK signaling pathway+ko04014//Ras signaling pathway+ko04015//Rap1 signaling pathway+ko04060//Cytokine-cytokine receptor interaction;K05453//macrophage colony-stimulating fa…
18591	4.1	1.2	-1.77259	2.03484e-27	2.16254e-28	Pdgfb	GO:2000379//positive regulation of reactive oxygen species metabolic process;GO:0045834//positive regulation of lipid metabolic process;GO:0023051//regulation of signaling;GO:2000113//negative regulation of cellular macromolecule biosynthetic process;GO:1903035//negative regulation of response to wounding;GO:0007169//transmembrane receptor protein tyrosine kinase signaling pathway;GO:0010595//pos…	K17386//platelet-derived growth factor subunit B+ko04630//Jak-STAT signaling pathway+ko04810//Regulation of actin cytoskeleton+ko04510//Focal adhesion+ko04072//Phospholipase D signaling pathway+ko01521//EGFR tyrosine kinase inhibitor resistance+ko05418//Fluid shear stress and atherosclerosis+ko05215//Prostate cancer+ko05214//Glioma+ko05211//Renal cell carcinoma+ko05218//Melanoma+ko04540//Gap junc…
269614	0.41	0.12	-1.77259	0.000261161	0.000112947	Pank4	GO:0034032//purine nucleoside bisphosphate metabolic process;GO:0019637//organophosphate metabolic process;GO:0009058//biosynthetic process;GO:0046483//heterocycle metabolic process;GO:0006796//phosphate-containing compound metabolic process;GO:0051186//cofactor metabolic process;GO:0072521//purine-containing compound metabolic process;GO:0009150//purine ribonucleotide metabolic process;GO:000915…	K09680//type II pantothenate kinase [EC:2.7.1.33]+ko00770//Pantothenate and CoA biosynthesis+ko01100//Metabolic pathways;K09680//type II pantothenate kinase [EC:2.7.1.33]+ko00770//Pantothenate and CoA biosynthesis+ko01100//Metabolic pathways;K09680//type II pantothenate kinase [EC:2.7.1.33]+ko00770//Pantothenate and CoA biosynthesis+ko01100//Metabolic pathways
225861	0.75	0.22	-1.76939	4.27748e-05	1.67241e-05	Snx32	GO:0006810//transport;GO:0015031//protein transport;GO:0051179//localization;GO:0008104//protein localization;GO:0016043//cellular component organization;GO:0098657//import into cell;GO:0071840//cellular component organization or biogenesis;GO:0051234//establishment of localization;GO:0006996//organelle organization;GO:0033036//macromolecule localization;GO:0009987//cellular process;GO:0071702//o…	K17920//sorting nexin-5/6/32+ko04144//Endocytosis;K17920//sorting nexin-5/6/32+ko04144//Endocytosis;K17920//sorting nexin-5/6/32+ko04144//Endocytosis
14254	3.1	0.91	-1.76833	5.25769e-25	6.10496e-26	Flt1	GO:1901532//regulation of hematopoietic progenitor cell differentiation;GO:0002682//regulation of immune system process;GO:1903727//positive regulation of phospholipid metabolic process;GO:0001763//morphogenesis of a branching structure;GO:0072359//circulatory system development;GO:0050794//regulation of cellular process;GO:0050793//regulation of developmental process;GO:0043412//macromolecule mo…	K05096//FMS-like tyrosine kinase 1 [EC:2.7.10.1]+ko04510//Focal adhesion+ko05323//Rheumatoid arthritis+ko05202//Transcriptional misregulation in cancer+ko04151//PI3K-Akt signaling pathway+ko04010//MAPK signaling pathway+ko04014//Ras signaling pathway+ko04015//Rap1 signaling pathway+ko04066//HIF-1 signaling pathway
353047	1.09	0.32	-1.76818	4.58378e-19	6.84314e-20	Plekhm1	GO:0065007//biological regulation;GO:0120035//regulation of plasma membrane bounded cell projection organization;GO:0060491//regulation of cell projection assembly;GO:0065008//regulation of biological quality;GO:0050789//regulation of biological process;GO:0051716//cellular response to stimulus;GO:0034103//regulation of tissue remodeling;GO:0008152//metabolic process;GO:0045780//positive regulati…	K19330//run domain Beclin-1 interacting and cysteine-rich containing protein+ko04140//Autophagy - animal
11517	0.17	0.05	-1.76553	7.58526e-05	3.06568e-05	Adcyap1r1	GO:0010676//positive regulation of cellular carbohydrate metabolic process;GO:0010863//positive regulation of phospholipase C activity;GO:0055065//metal ion homeostasis;GO:0051049//regulation of transport;GO:0010517//regulation of phospholipase activity;GO:0019725//cellular homeostasis;GO:0030802//regulation of cyclic nucleotide biosynthetic process;GO:0045913//positive regulation of carbohydrate…	K04587//pituitary adenylate cyclase-activating polypeptide type I receptor+ko04024//cAMP signaling pathway+ko04911//Insulin secretion+ko04713//Circadian entrainment+ko04080//Neuroactive ligand-receptor interaction+ko04924//Renin secretion;K04587//pituitary adenylate cyclase-activating polypeptide type I receptor+ko04024//cAMP signaling pathway+ko04911//Insulin secretion+ko04713//Circadian entrain…
20868	0.17	0.05	-1.76553	0.000628889	0.000287492	Stk10	GO:0044238//primary metabolic process;GO:0051173//positive regulation of nitrogen compound metabolic process;GO:0071704//organic substance metabolic process;GO:0045937//positive regulation of phosphate metabolic process;GO:0007154//cell communication;GO:0009893//positive regulation of metabolic process;GO:0051246//regulation of protein metabolic process;GO:0042981//regulation of apoptotic process…	K08837//serine/threonine kinase 10 [EC:2.7.11.1]+ko04914//Progesterone-mediated oocyte maturation
22722	0.68	0.2	-1.76553	3.94729e-07	1.2468e-07	Zfp64	GO:0032680//regulation of tumor necrosis factor production;GO:0032648//regulation of interferon-beta production;GO:0051239//regulation of multicellular organismal process;GO:0001817//regulation of cytokine production;GO:0009893//positive regulation of metabolic process;GO:0032760//positive regulation of tumor necrosis factor production;GO:0050684//regulation of mRNA processing;GO:0048024//regulat…	K09228//KRAB domain-containing zinc finger protein
330830	0.34	0.1	-1.76553	0.000510339	0.000230562	Drc7	GO:0030154//cell differentiation;GO:0044703//multi-organism reproductive process;GO:0007276//gamete generation;GO:0051704//multi-organism process;GO:0048869//cellular developmental process;GO:0007283//spermatogenesis;GO:0022414//reproductive process;GO:0000003//reproduction;GO:0032502//developmental process;GO:0009987//cellular process;GO:0032501//multicellular organismal process;GO:0048609//mult…	K18402//PHD finger protein 20
67860	1.7	0.5	-1.76553	3.59652e-07	1.13306e-07	S100a16	GO:0051592//response to calcium ion;GO:0042221//response to chemical;GO:0010035//response to inorganic substance;GO:0010038//response to metal ion;GO:0050896//response to stimulus;GO:0071944//cell periphery;GO:0043231//intracellular membrane-bounded organelle;GO:0043226//organelle;GO:0070062//extracellular exosome;GO:0043230//extracellular organelle;GO:0043227//membrane-bounded organelle;GO:00444…
269999	2.17	0.64	-1.76155	1.80306e-10	4.37944e-11	Orai3	GO:0051179//localization;GO:0006810//transport;GO:0051234//establishment of localization;GO:0006811//ion transport;GO:0070838//divalent metal ion transport;GO:0030001//metal ion transport;GO:0006812//cation transport;GO:0002115//store-operated calcium entry;GO:0006816//calcium ion transport;GO:0072511//divalent inorganic cation transport;GO:0044425//membrane part;GO:0016021//integral component of…	K16058//calcium release-activated calcium channel protein 3+ko04020//Calcium signaling pathway
BGI_novel_G000516	1.66	0.49	-1.76033	4.76529e-09	1.29299e-09	BGI_novel_G000516	GO:0002252//immune effector process;GO:0006952//defense response;GO:0098542//defense response to other organism;GO:0065003//macromolecular complex assembly;GO:0051607//defense response to virus;GO:0009607//response to biotic stimulus;GO:0034622//cellular macromolecular complex assembly;GO:0043207//response to external biotic stimulus;GO:0006996//organelle organization;GO:0043623//cellular protein…	K14754//interferon-induced GTP-binding protein Mx1+ko05162//Measles+ko05165//Human papillomavirus infection+ko05164//Influenza A
106633	1.05	0.31	-1.76005	4.12151e-18	6.46236e-19	Ift140	GO:0060173//limb development;GO:0050794//regulation of cellular process;GO:0010970//transport along microtubule;GO:0015031//protein transport;GO:0030182//neuron differentiation;GO:0071705//nitrogen compound transport;GO:0042073//intraciliary transport;GO:0009855//determination of bilateral symmetry;GO:0048666//neuron development;GO:0007275//multicellular organism development;GO:0006928//movement …	K19672//intraflagellar transport protein 140;K19672//intraflagellar transport protein 140;K19672//intraflagellar transport protein 140;K19672//intraflagellar transport protein 140;K19672//intraflagellar transport protein 140
230235	0.44	0.13	-1.75899	1.50924e-06	5.01938e-07	Frrs1l		K03843//alpha-1,3/alpha-1,6-mannosyltransferase [EC:2.4.1.132 2.4.1.257]+ko00510//N-Glycan biosynthesis+ko01100//Metabolic pathways
74148	0.44	0.13	-1.75899	1.80581e-08	5.14238e-09	Cluh	GO:0048312//intracellular distribution of mitochondria;GO:0071840//cellular component organization or biogenesis;GO:0051179//localization;GO:0051641//cellular localization;GO:0051640//organelle localization;GO:0048311//mitochondrion distribution;GO:0016043//cellular component organization;GO:0007005//mitochondrion organization;GO:0009987//cellular process;GO:0006996//organelle organization;GO:005…	K03255//protein TIF31
14073	2.3	0.68	-1.75803	3.85615e-26	4.30002e-27	Faah	GO:0003008//system process;GO:0097756//negative regulation of blood vessel diameter;GO:0071704//organic substance metabolic process;GO:0072329//monocarboxylic acid catabolic process;GO:0008015//blood circulation;GO:0065008//regulation of biological quality;GO:0097746//regulation of blood vessel diameter;GO:0090066//regulation of anatomical structure size;GO:0044237//cellular metabolic process;GO:…	K15528//fatty acid amide hydrolase [EC:3.5.1.99]+ko04723//Retrograde endocannabinoid signaling;K15528//fatty acid amide hydrolase [EC:3.5.1.99]+ko04723//Retrograde endocannabinoid signaling
12663	0.27	0.08	-1.75489	3.09979e-06	1.06787e-06	Chml	GO:0043412//macromolecule modification;GO:0015031//protein transport;GO:0006886//intracellular protein transport;GO:0051716//cellular response to stimulus;GO:0045184//establishment of protein localization;GO:0006807//nitrogen compound metabolic process;GO:0007264//small GTPase mediated signal transduction;GO:0046907//intracellular transport;GO:0007165//signal transduction;GO:0051641//cellular loc…	K17255//Rab GDP dissociation inhibitor
382056	0.54	0.16	-1.75489	4.90463e-06	1.72026e-06	Crtc1	GO:0048167//regulation of synaptic plasticity;GO:0016070//RNA metabolic process;GO:0009059//macromolecule biosynthetic process;GO:0019219//regulation of nucleobase-containing compound metabolic process;GO:0032502//developmental process;GO:0045664//regulation of neuron differentiation;GO:0051091//positive regulation of DNA binding transcription factor activity;GO:0007613//memory;GO:0010557//positi…	K15309//CREB-regulated transcription coactivator 1+ko05166//HTLV-I infection
67315	1.08	0.32	-1.75489	1.52244e-07	4.65326e-08	Ceacam12		K06499//carcinoembryonic antigen-related cell adhesion molecule
66451	1.45	0.43	-1.75364	6.80029e-05	2.7347e-05	2610528J11Rik	GO:0044464//cell part;GO:0044425//membrane part;GO:0055037//recycling endosome;GO:0005622//intracellular;GO:0031224//intrinsic component of membrane;GO:0005737//cytoplasm;GO:0016021//integral component of membrane;GO:0043226//organelle;GO:0097708//intracellular vesicle;GO:0043227//membrane-bounded organelle;GO:0012505//endomembrane system;GO:0005769//early endosome;GO:0031410//cytoplasmic vesicle…	K12393//AP-1 complex subunit mu+ko04142//Lysosome
[truncated: 869 more rows]
