# Supplementary material for: The ubiquitin ligase KBTBD8 regulates PKM1 levels via Erk1/2 and Aurora A to ensure oocyte quality
Source: Aging (Albany NY). 2019 Feb 20;11(4):1110–28. doi: 10.18632/aging.101802 (PMC6402520; doi:10.18632/aging.101802)
Supplement: Supplementary Dataset 2 [file aging-11-101802-s003.xls]

## Sheet: KBTBD8 DE vs control-up
Gene ID	IgG FPKM	K8 FPKM	log2(K8/IgG)	FDR(IgG-vs-K8)	Pvalue(IgG-vs-K8)	Other Gene ID	GO	Kegg Orthology
BGI_novel_G000252	0	5.74	9.16491	1.78651e-176	2.05074e-178	BGI_novel_G000252	GO:0043408//regulation of MAPK cascade;GO:1903242//regulation of cardiac muscle hypertrophy in response to stress;GO:1901700//response to oxygen-containing compound;GO:0035556//intracellular signal transduction;GO:0032269//negative regulation of cellular protein metabolic process;GO:0030323//respiratory tube development;GO:0031326//regulation of cellular biosynthetic process;GO:0031324//negative …	K08886//activated CDC42 kinase 1 [EC:2.7.10.2 2.7.11.1]
100034363	0	2.48	7.9542	1.05435e-15	1.85534e-16	Tmsb15b2	GO:1902903//regulation of supramolecular fiber organization;GO:0030837//negative regulation of actin filament polymerization;GO:0007015//actin filament organization;GO:0051641//cellular localization;GO:0051651//maintenance of location in cell;GO:0008064//regulation of actin polymerization or depolymerization;GO:0032231//regulation of actin filament bundle assembly;GO:0051497//negative regulation …	K05764//thymosin, beta 4+ko04810//Regulation of actin cytoskeleton
75465	0	2.37	7.88874	1.12829e-10	2.70064e-11	Dynlrb2	GO:0006810//transport;GO:0051234//establishment of localization;GO:0007017//microtubule-based process;GO:0006928//movement of cell or subcellular component;GO:0007018//microtubule-based movement;GO:0051179//localization;GO:0009987//cellular process;GO:0044444//cytoplasmic part;GO:0005874//microtubule;GO:0005623//cell;GO:0005929//cilium;GO:0030286//dynein complex;GO:0120038//plasma membrane bounde…	K10419//dynein light chain roadblock-type
BGI_novel_G000150	0	1.94	7.59991	9.09314e-17	1.51868e-17	BGI_novel_G000150		K16836//T-cell leukemia/lymphoma 1B+ko04151//PI3K-Akt signaling pathway
BGI_novel_G000249	0	1.36	7.08746	1.42616e-08	4.03068e-09	BGI_novel_G000249	GO:0034654//nucleobase-containing compound biosynthetic process;GO:0006139//nucleobase-containing compound metabolic process;GO:0006862//nucleotide transport;GO:0055085//transmembrane transport;GO:1903426//regulation of reactive oxygen species biosynthetic process;GO:0042221//response to chemical;GO:0080090//regulation of primary metabolic process;GO:1901652//response to peptide;GO:0042127//regul…	K15116//solute carrier family 25, member 33/36
BGI_novel_G000737	0	1.34	7.06609	5.64459e-28	5.8671e-29	BGI_novel_G000737		K22823//non-structural maintenance of chromosomes element 3
18347	0	1.31	7.03342	1.82881e-11	4.13284e-12	Olfr48	GO:0051716//cellular response to stimulus;GO:0007606//sensory perception of chemical stimulus;GO:0007186//G-protein coupled receptor signaling pathway;GO:0003008//system process;GO:0009987//cellular process;GO:0050877//nervous system process;GO:0050794//regulation of cellular process;GO:0050896//response to stimulus;GO:0007165//signal transduction;GO:0009593//detection of chemical stimulus;GO:005…	K04257//olfactory receptor+ko04740//Olfactory transduction
BGI_novel_G000459	0	1.2	6.90689	1.12859e-10	2.70064e-11	BGI_novel_G000459		K06856//immunoglobulin heavy chain+ko04020//Calcium signaling pathway+ko05414//Dilated cardiomyopathy (DCM)+ko05416//Viral myocarditis+ko04145//Phagosome+ko04640//Hematopoietic cell lineage+ko04072//Phospholipase D signaling pathway+ko04650//Natural killer cell mediated cytotoxicity+ko05322//Systemic lupus erythematosus+ko04664//Fc epsilon RI signaling pathway+ko04666//Fc gamma R-mediated phagocy…
170461	0	1.12	6.80735	2.67741e-17	4.34498e-18	Stard6	GO:0006810//transport;GO:0051234//establishment of localization;GO:0071702//organic substance transport;GO:0051179//localization;GO:0033036//macromolecule localization;GO:0010876//lipid localization;GO:0006869//lipid transport;GO:0043231//intracellular membrane-bounded organelle;GO:0043229//intracellular organelle;GO:0005737//cytoplasm;GO:0044464//cell part;GO:0043227//membrane-bounded organelle;…	K21988//transmembrane channel-like protein;K22291//StAR-related lipid transfer protein 3+ko04979//Cholesterol metabolism
258689	0	1.12	6.80735	1.98612e-19	2.91122e-20	Olfr1466	GO:0007606//sensory perception of chemical stimulus;GO:0050896//response to stimulus;GO:0023052//signaling;GO:0050794//regulation of cellular process;GO:0050877//nervous system process;GO:0007600//sensory perception;GO:0007165//signal transduction;GO:0051716//cellular response to stimulus;GO:0009987//cellular process;GO:0007608//sensory perception of smell;GO:0003008//system process;GO:0007186//G…	K04257//olfactory receptor+ko04740//Olfactory transduction;K04257//olfactory receptor+ko04740//Olfactory transduction
BGI_novel_G000465	0	1.1	6.78136	1.24584e-18	1.90236e-19	BGI_novel_G000465		K09228//KRAB domain-containing zinc finger protein
258762	0	1.02	6.67243	2.33853e-09	6.16824e-10	Olfr1109	GO:0023052//signaling;GO:0007154//cell communication;GO:0007606//sensory perception of chemical stimulus;GO:0065007//biological regulation;GO:0051716//cellular response to stimulus;GO:0050896//response to stimulus;GO:0032501//multicellular organismal process;GO:0007186//G-protein coupled receptor signaling pathway;GO:0050877//nervous system process;GO:0007165//signal transduction;GO:0007608//sens…	K04257//olfactory receptor+ko04740//Olfactory transduction
279706	0	0.88	6.45943	1.45071e-17	2.32406e-18	Nup62cl	GO:0017038//protein import;GO:0051649//establishment of localization in cell;GO:0033365//protein localization to organelle;GO:0071702//organic substance transport;GO:0034613//cellular protein localization;GO:0071166//ribonucleoprotein complex localization;GO:0045184//establishment of protein localization;GO:0033036//macromolecule localization;GO:0051236//establishment of RNA localization;GO:00512…	K14306//nuclear pore complex protein Nup62+ko03013//RNA transport;K14306//nuclear pore complex protein Nup62+ko03013//RNA transport;K14306//nuclear pore complex protein Nup62+ko03013//RNA transport;K14306//nuclear pore complex protein Nup62+ko03013//RNA transport;K14306//nuclear pore complex protein Nup62+ko03013//RNA transport;K14306//nuclear pore complex protein Nup62+ko03013//RNA transport;K14…
20216	0	0.77	6.26679	3.1576e-20	4.4551e-21	Acsm3	GO:1901576//organic substance biosynthetic process;GO:0032787//monocarboxylic acid metabolic process;GO:0044255//cellular lipid metabolic process;GO:0072329//monocarboxylic acid catabolic process;GO:0006631//fatty acid metabolic process;GO:0006732//coenzyme metabolic process;GO:0035383//thioester metabolic process;GO:0044281//small molecule metabolic process;GO:0019752//carboxylic acid metabolic …	K01896//medium-chain acyl-CoA synthetase [EC:6.2.1.2]+ko00650//Butanoate metabolism+ko01100//Metabolic pathways
18719	0	0.73	6.18982	3.66273e-19	5.4427e-20	Pip5k1b	GO:0006650//glycerophospholipid metabolic process;GO:0006793//phosphorus metabolic process;GO:0044237//cellular metabolic process;GO:0046486//glycerolipid metabolic process;GO:0045017//glycerolipid biosynthetic process;GO:0008152//metabolic process;GO:0044255//cellular lipid metabolic process;GO:0019637//organophosphate metabolic process;GO:0006661//phosphatidylinositol biosynthetic process;GO:00…	K00889//1-phosphatidylinositol-4-phosphate 5-kinase [EC:2.7.1.68]+ko04144//Endocytosis+ko04810//Regulation of actin cytoskeleton+ko04070//Phosphatidylinositol signaling system+ko04072//Phospholipase D signaling pathway+ko04666//Fc gamma R-mediated phagocytosis+ko00562//Inositol phosphate metabolism+ko05231//Choline metabolism in cancer+ko01100//Metabolic pathways
545662	0	0.72	6.16993	1.21987e-14	2.26662e-15	B020004J07Rik	GO:0048519//negative regulation of biological process;GO:0010556//regulation of macromolecule biosynthetic process;GO:0051171//regulation of nitrogen compound metabolic process;GO:0043067//regulation of programmed cell death;GO:1902679//negative regulation of RNA biosynthetic process;GO:1903506//regulation of nucleic acid-templated transcription;GO:0048522//positive regulation of cellular process…	K14284//nuclear RNA export factor+ko03013//RNA transport+ko03015//mRNA surveillance pathway+ko03008//Ribosome biogenesis in eukaryotes+ko05164//Influenza A+ko05168//Herpes simplex infection;K10308//F-box protein 31
22775	0	0.71	6.14975	3.4518e-31	3.21776e-32	Zik1	GO:0050789//regulation of biological process;GO:0051171//regulation of nitrogen compound metabolic process;GO:0097659//nucleic acid-templated transcription;GO:0050794//regulation of cellular process;GO:0019222//regulation of metabolic process;GO:0009987//cellular process;GO:0006139//nucleobase-containing compound metabolic process;GO:0006351//transcription, DNA-templated;GO:0080090//regulation of…	K09228//KRAB domain-containing zinc finger protein
67770	0.01	0.7	6.12928	9.16019e-14	1.78408e-14	Caap1	GO:0006915//apoptotic process;GO:0012501//programmed cell death;GO:0008219//cell death;GO:0009987//cellular process;	K14018//phospholipase A-2-activating protein+ko04141//Protein processing in endoplasmic reticulum
57014	0	0.69	6.10852	4.92895e-17	8.1232e-18	Htr3b	GO:0043269//regulation of ion transport;GO:0070848//response to growth factor;GO:0051716//cellular response to stimulus;GO:0065009//regulation of molecular function;GO:0050789//regulation of biological process;GO:0048518//positive regulation of biological process;GO:0034764//positive regulation of transmembrane transport;GO:0065007//biological regulation;GO:0034762//regulation of transmembrane tr…	K04819//5-hydroxytryptamine receptor 3+ko04726//Serotonergic synapse+ko04742//Taste transduction
238829	0	0.64	6	9.84889e-07	3.21774e-07	Cldn34b3	GO:0031224//intrinsic component of membrane;GO:0005911//cell-cell junction;GO:0016021//integral component of membrane;GO:0044425//membrane part;GO:0043296//apical junction complex;GO:0005923//bicellular tight junction;GO:0070160//occluding junction;GO:0030054//cell junction;GO:0016020//membrane;GO:0005198//structural molecule activity;	K06087//claudin+ko04514//Cell adhesion molecules (CAMs)+ko04530//Tight junction+ko04670//Leukocyte transendothelial migration+ko05160//Hepatitis C
13052	0	0.63	5.97728	2.93672e-32	2.63388e-33	Cxadr	GO:0065008//regulation of biological quality;GO:0060326//cell chemotaxis;GO:0044057//regulation of system process;GO:0022412//cellular process involved in reproduction in multicellular organism;GO:0002252//immune effector process;GO:0051239//regulation of multicellular organismal process;GO:0055022//negative regulation of cardiac muscle tissue growth;GO:0055007//cardiac muscle cell differentiatio…	K06788//coxsackievirus and adenovirus receptor+ko05416//Viral myocarditis
433107	0	0.63	5.97728	0.000379008	0.000167858	Esp6	GO:0005576//extracellular region;GO:0044421//extracellular region part;GO:0005615//extracellular space;GO:0005102//receptor binding;GO:0005515//protein binding;GO:0005186//pheromone activity;GO:0005488//binding;
65963	0	0.63	5.97728	9.8508e-07	3.21774e-07	Tmem176b	GO:1903706//regulation of hemopoiesis;GO:1902106//negative regulation of leukocyte differentiation;GO:0048519//negative regulation of biological process;GO:0065007//biological regulation;GO:0051093//negative regulation of developmental process;GO:0051239//regulation of multicellular organismal process;GO:0051241//negative regulation of multicellular organismal process;GO:0048523//negative regulat…
15497	0	0.57	5.83289	1.12889e-10	2.70064e-11	Hsd3b6	GO:1901360//organic cyclic compound metabolic process;GO:1901362//organic cyclic compound biosynthetic process;GO:1901576//organic substance biosynthetic process;GO:0008610//lipid biosynthetic process;GO:0009058//biosynthetic process;GO:0044238//primary metabolic process;GO:0071704//organic substance metabolic process;GO:0008152//metabolic process;GO:0006629//lipid metabolic process;GO:0008202//s…	K00070//3beta-hydroxy-Delta5-steroid dehydrogenase / steroid Delta-isomerase [EC:1.1.1.145 5.3.3.1]+ko04913//Ovarian steroidogenesis+ko04934//Cushing's syndrome+ko00140//Steroid hormone biosynthesis+ko01100//Metabolic pathways+ko04927//Cortisol synthesis and secretion+ko04925//Aldosterone synthesis and secretion
100312474	0	0.56	5.80735	1.9564e-05	7.34932e-06	Vmn1r88	GO:0007606//sensory perception of chemical stimulus;GO:0042221//response to chemical;GO:0007600//sensory perception;GO:0003008//system process;GO:0032501//multicellular organismal process;GO:0010033//response to organic substance;GO:0050896//response to stimulus;GO:0050877//nervous system process;GO:0019236//response to pheromone;GO:0044425//membrane part;GO:0044464//cell part;GO:0005623//cell;GO…	K04614//vomeronasal1 receptor
BGI_novel_G000246	0	0.56	5.80735	0.000681876	0.000313822	BGI_novel_G000246		K02922//large subunit ribosomal protein L37e+ko03010//Ribosome
240549	0	0.55	5.78136	1.42648e-08	4.03068e-09	Gm4952	GO:0005622//intracellular;GO:0044444//cytoplasmic part;GO:0005739//mitochondrion;GO:0044464//cell part;GO:0043231//intracellular membrane-bounded organelle;GO:0044424//intracellular part;GO:0043226//organelle;GO:0005623//cell;GO:0043227//membrane-bounded organelle;GO:0043229//intracellular organelle;GO:0005737//cytoplasm;GO:0047961//glycine N-acyltransferase activity;GO:0016740//transferase activ…	K15517//glycine N-phenylacetyltransferase [EC:2.3.1.192]+ko00360//Phenylalanine metabolism
258592	0	0.53	5.72792	1.08094e-05	3.93106e-06	Olfr697	GO:0007154//cell communication;GO:0007165//signal transduction;GO:0023052//signaling;GO:0051716//cellular response to stimulus;GO:0032501//multicellular organismal process;GO:0007600//sensory perception;GO:0065007//biological regulation;GO:0050794//regulation of cellular process;GO:0050896//response to stimulus;GO:0050789//regulation of biological process;GO:0050877//nervous system process;GO:000…	K04257//olfactory receptor+ko04740//Olfactory transduction
79455	0	0.53	5.72792	1.7905e-06	6.01578e-07	Pdcl2	GO:0006807//nitrogen compound metabolic process;GO:0034654//nucleobase-containing compound biosynthetic process;GO:0042455//ribonucleoside biosynthetic process;GO:0009116//nucleoside metabolic process;GO:1901576//organic substance biosynthetic process;GO:0009163//nucleoside biosynthetic process;GO:1901564//organonitrogen compound metabolic process;GO:0071704//organic substance metabolic process;G…	K00509//prostaglandin-endoperoxide synthase 1 [EC:1.14.99.1]+ko04726//Serotonergic synapse+ko00590//Arachidonic acid metabolism+ko04611//Platelet activation+ko01100//Metabolic pathways+ko04923//Regulation of lipolysis in adipocytes;K08327//phosducin
100043456	0	0.51	5.67243	1.42776e-08	4.03068e-09	Gm10681	GO:0006629//lipid metabolic process;GO:0050896//response to stimulus;GO:1901362//organic cyclic compound biosynthetic process;GO:0071704//organic substance metabolic process;GO:0044238//primary metabolic process;GO:0008202//steroid metabolic process;GO:0009058//biosynthetic process;GO:0010033//response to organic substance;GO:0008610//lipid biosynthetic process;GO:1901576//organic substance biosy…	K00070//3beta-hydroxy-Delta5-steroid dehydrogenase / steroid Delta-isomerase [EC:1.1.1.145 5.3.3.1]+ko04913//Ovarian steroidogenesis+ko04934//Cushing's syndrome+ko00140//Steroid hormone biosynthesis+ko01100//Metabolic pathways+ko04927//Cortisol synthesis and secretion+ko04925//Aldosterone synthesis and secretion
216984	0	0.51	5.67243	6.7531e-19	1.01754e-19	Evi2b	GO:0048522//positive regulation of cellular process;GO:0032502//developmental process;GO:0010941//regulation of cell death;GO:0030852//regulation of granulocyte differentiation;GO:1903706//regulation of hemopoiesis;GO:0010564//regulation of cell cycle process;GO:0048513//animal organ development;GO:0051302//regulation of cell division;GO:0045595//regulation of cell differentiation;GO:0045639//pos…	K16854//ecotropic viral integration site 2B protein
74279	0	0.51	5.67243	4.79951e-08	1.40882e-08	1700080O16Rik		K22823//non-structural maintenance of chromosomes element 3
75647	0	0.51	5.67243	5.3781e-07	1.72113e-07	Ssmem1	GO:0016021//integral component of membrane;GO:0044425//membrane part;GO:0016020//membrane;GO:0031224//intrinsic component of membrane;
100040899	0	0.5	5.64386	0.000683093	0.000313822	Gm15142	GO:0031224//intrinsic component of membrane;GO:0005923//bicellular tight junction;GO:0030054//cell junction;GO:0005911//cell-cell junction;GO:0016020//membrane;GO:0043296//apical junction complex;GO:0016021//integral component of membrane;GO:0070160//occluding junction;GO:0044425//membrane part;GO:0005198//structural molecule activity;
107321	0	0.5	5.64386	1.42744e-08	4.03068e-09	Lpxn	GO:0007155//cell adhesion;GO:0050789//regulation of biological process;GO:0050776//regulation of immune response;GO:0016070//RNA metabolic process;GO:0030155//regulation of cell adhesion;GO:0051252//regulation of RNA metabolic process;GO:0019222//regulation of metabolic process;GO:0044237//cellular metabolic process;GO:0043170//macromolecule metabolic process;GO:0008152//metabolic process;GO:0050…	K05760//paxillin+ko04810//Regulation of actin cytoskeleton+ko04510//Focal adhesion+ko05100//Bacterial invasion of epithelial cells+ko05203//Viral carcinogenesis+ko05205//Proteoglycans in cancer+ko04370//VEGF signaling pathway+ko04670//Leukocyte transendothelial migration+ko04062//Chemokine signaling pathway+ko05163//Human cytomegalovirus infection+ko05165//Human papillomavirus infection
12942	0	0.5	5.64386	1.9342e-27	2.0507e-28	Pcdha11	GO:0007275//multicellular organism development;GO:0007399//nervous system development;GO:0007154//cell communication;GO:0032501//multicellular organismal process;GO:0009987//cellular process;GO:0048731//system development;GO:0098609//cell-cell adhesion;GO:0007155//cell adhesion;GO:0032502//developmental process;GO:0098742//cell-cell adhesion via plasma-membrane adhesion molecules;GO:0023052//sign…	K16493//protocadherin alpha
668357	0	0.5	5.64386	1.79151e-06	6.01578e-07	Dmrtc1c2	GO:0043229//intracellular organelle;GO:0005634//nucleus;GO:0044424//intracellular part;GO:0044464//cell part;GO:0005622//intracellular;GO:0043226//organelle;GO:0043231//intracellular membrane-bounded organelle;GO:0043227//membrane-bounded organelle;GO:0005623//cell;GO:0003700//DNA binding transcription factor activity;GO:0140110//transcription regulator activity;	K19494//doublesex- and mab-3-related transcription factor 8
74069	0	0.5	5.64386	1.60777e-07	4.9242e-08	Serpina3a	GO:0044421//extracellular region part;GO:0005615//extracellular space;GO:0005576//extracellular region;GO:0098772//molecular function regulator;GO:0004857//enzyme inhibitor activity;GO:0061135//endopeptidase regulator activity;GO:0004866//endopeptidase inhibitor activity;GO:0061134//peptidase regulator activity;GO:0030414//peptidase inhibitor activity;GO:0030234//enzyme regulator activity;GO:0004…	K04525//serpin peptidase inhibitor, clade A
14102	0	0.47	5.55459	2.94694e-07	9.20606e-08	Fas	GO:0097192//extrinsic apoptotic signaling pathway in absence of ligand;GO:0008152//metabolic process;GO:0036296//response to increased oxygen levels;GO:1901700//response to oxygen-containing compound;GO:0045619//regulation of lymphocyte differentiation;GO:0055093//response to hyperoxia;GO:0002683//negative regulation of immune system process;GO:2001241//positive regulation of extrinsic apoptotic …	K04390//tumor necrosis factor receptor superfamily member 6+ko04217//Necroptosis+ko04210//Apoptosis+ko01524//Platinum drug resistance+ko04650//Natural killer cell mediated cytotoxicity+ko04940//Type I diabetes mellitus+ko04668//TNF signaling pathway+ko05143//African trypanosomiasis+ko05142//Chagas disease (American trypanosomiasis)+ko05320//Autoimmune thyroid disease+ko05200//Pathways in cancer+k…
100061	0	0.46	5.52356	2.58359e-13	5.17696e-14	Lrrc19	GO:0007166//cell surface receptor signaling pathway;GO:1904892//regulation of STAT cascade;GO:0009987//cellular process;GO:0045859//regulation of protein kinase activity;GO:0019221//cytokine-mediated signaling pathway;GO:1904893//negative regulation of STAT cascade;GO:0033673//negative regulation of kinase activity;GO:0045936//negative regulation of phosphate metabolic process;GO:0044092//negativ…	K13023//carboxypeptidase N regulatory subunit;K07523//netrin-G1 ligand+ko04360//Axon guidance+ko04514//Cell adhesion molecules (CAMs)
332923	0	0.46	5.52356	5.37916e-07	1.72113e-07	Gm12794	GO:0048522//positive regulation of cellular process;GO:0008284//positive regulation of cell proliferation;GO:0045934//negative regulation of nucleobase-containing compound metabolic process;GO:0060255//regulation of macromolecule metabolic process;GO:0010941//regulation of cell death;GO:0048518//positive regulation of biological process;GO:0006355//regulation of transcription, DNA-templated;GO:00…	K10308//F-box protein 31;K14284//nuclear RNA export factor+ko03013//RNA transport+ko03015//mRNA surveillance pathway+ko03008//Ribosome biogenesis in eukaryotes+ko05164//Influenza A+ko05168//Herpes simplex infection
329919	0	0.44	5.45943	1.0815e-05	3.93106e-06	Skint2	GO:0048519//negative regulation of biological process;GO:0002695//negative regulation of leukocyte activation;GO:0002682//regulation of immune system process;GO:1903037//regulation of leukocyte cell-cell adhesion;GO:0050865//regulation of cell activation;GO:0022407//regulation of cell-cell adhesion;GO:0022408//negative regulation of cell-cell adhesion;GO:1903038//negative regulation of leukocyte …	K06712//butyrophilin
381350	0	0.44	5.45943	2.33909e-09	6.16824e-10	Spag6	GO:0005623//cell;GO:0044424//intracellular part;GO:0043227//membrane-bounded organelle;GO:0044464//cell part;GO:0005622//intracellular;GO:0043229//intracellular organelle;GO:0043226//organelle;GO:0005634//nucleus;GO:0043231//intracellular membrane-bounded organelle;	K15043//importin subunit alpha-2+ko05164//Influenza A
70887	0	0.44	5.45943	1.95772e-05	7.34932e-06	Dmrtc1a	GO:0034654//nucleobase-containing compound biosynthetic process;GO:0008152//metabolic process;GO:0034641//cellular nitrogen compound metabolic process;GO:0043170//macromolecule metabolic process;GO:1901576//organic substance biosynthetic process;GO:0044260//cellular macromolecule metabolic process;GO:0009987//cellular process;GO:0009058//biosynthetic process;GO:0044271//cellular nitrogen compound…	K19494//doublesex- and mab-3-related transcription factor 8;K19494//doublesex- and mab-3-related transcription factor 8;K19494//doublesex- and mab-3-related transcription factor 8
69281	0.03	1.3	5.43741	1.75871e-12	3.7304e-13	Spata4	GO:0005623//cell;GO:0005622//intracellular;GO:0044424//intracellular part;GO:0044464//cell part;GO:0005737//cytoplasm;
108167848	0.01	0.43	5.42626	6.2393e-16	1.08652e-16	LOC108167848	GO:0019222//regulation of metabolic process;GO:0050794//regulation of cellular process;GO:0009889//regulation of biosynthetic process;GO:0006355//regulation of transcription, DNA-templated;GO:0031323//regulation of cellular metabolic process;GO:0080090//regulation of primary metabolic process;GO:0051252//regulation of RNA metabolic process;GO:2001141//regulation of RNA biosynthetic process;GO:001…	K09228//KRAB domain-containing zinc finger protein
208665	0	0.43	5.42626	9.84509e-07	3.21774e-07	Akr1d1	GO:0046395//carboxylic acid catabolic process;GO:0046164//alcohol catabolic process;GO:0008152//metabolic process;GO:0044283//small molecule biosynthetic process;GO:1901575//organic substance catabolic process;GO:0046394//carboxylic acid biosynthetic process;GO:1901360//organic cyclic compound metabolic process;GO:0008610//lipid biosynthetic process;GO:0006694//steroid biosynthetic process;GO:001…	K00251//3-oxo-5-beta-steroid 4-dehydrogenase [EC:1.3.1.3]+ko00120//Primary bile acid biosynthesis+ko00140//Steroid hormone biosynthesis+ko01100//Metabolic pathways;K00251//3-oxo-5-beta-steroid 4-dehydrogenase [EC:1.3.1.3]+ko00120//Primary bile acid biosynthesis+ko00140//Steroid hormone biosynthesis+ko01100//Metabolic pathways
241201	0	0.42	5.39232	1.24636e-18	1.90236e-19	Cdh7	GO:0022610//biological adhesion;GO:0098742//cell-cell adhesion via plasma-membrane adhesion molecules;GO:0098609//cell-cell adhesion;GO:0007155//cell adhesion;GO:0007156//homophilic cell adhesion via plasma membrane adhesion molecules;GO:0016021//integral component of membrane;GO:0071944//cell periphery;GO:0044464//cell part;GO:0005623//cell;GO:0005886//plasma membrane;GO:0016020//membrane;GO:003…	K06799//cadherin 7, type 2
368203	0	0.42	5.39232	6.40881e-05	2.56878e-05	Gm5136	GO:0006302//double-strand break repair;GO:0048523//negative regulation of cellular process;GO:0006325//chromatin organization;GO:2001020//regulation of response to DNA damage stimulus;GO:0019222//regulation of metabolic process;GO:0048522//positive regulation of cellular process;GO:0006974//cellular response to DNA damage stimulus;GO:0051726//regulation of cell cycle;GO:0031325//positive regulati…	K11864//BRCA1/BRCA2-containing complex subunit 3 [EC:3.4.19.-]+ko03440//Homologous recombination+ko04621//NOD-like receptor signaling pathway
77674	0	0.42	5.39232	0.000210458	8.9785e-05	Defb12	GO:0045087//innate immune response;GO:0051704//multi-organism process;GO:0051707//response to other organism;GO:0002376//immune system process;GO:0009605//response to external stimulus;GO:0009607//response to biotic stimulus;GO:0009617//response to bacterium;GO:0043207//response to external biotic stimulus;GO:0006950//response to stress;GO:0042742//defense response to bacterium;GO:0006955//immune…
75185	0	0.41	5.35755	0.000379386	0.000167858	Samt4	GO:0005923//bicellular tight junction;GO:0070160//occluding junction;GO:0031224//intrinsic component of membrane;GO:0044425//membrane part;GO:0043296//apical junction complex;GO:0016020//membrane;GO:0005911//cell-cell junction;GO:0030054//cell junction;GO:0016021//integral component of membrane;GO:0005198//structural molecule activity;
54635	0.01	0.39	5.2854	1.12633e-09	2.89912e-10	Pdgfc	GO:0071229//cellular response to acid chemical;GO:0031328//positive regulation of cellular biosynthetic process;GO:0071230//cellular response to amino acid stimulus;GO:1901698//response to nitrogen compound;GO:0031325//positive regulation of cellular metabolic process;GO:0007154//cell communication;GO:0031326//regulation of cellular biosynthetic process;GO:0030335//positive regulation of cell mig…	K05450//platelet derived growth factor C/D+ko04810//Regulation of actin cytoskeleton+ko04510//Focal adhesion+ko04072//Phospholipase D signaling pathway+ko01521//EGFR tyrosine kinase inhibitor resistance+ko05215//Prostate cancer+ko05218//Melanoma+ko04540//Gap junction+ko04151//PI3K-Akt signaling pathway+ko04010//MAPK signaling pathway+ko04014//Ras signaling pathway+ko04015//Rap1 signaling pathway+…
20311	0	0.37	5.20945	1.79084e-06	6.01578e-07	Cxcl5	GO:0048518//positive regulation of biological process;GO:0031341//regulation of cell killing;GO:0050896//response to stimulus;GO:0051674//localization of cell;GO:0032103//positive regulation of response to external stimulus;GO:0007154//cell communication;GO:0002697//regulation of immune effector process;GO:0050789//regulation of biological process;GO:0002886//regulation of myeloid leukocyte media…	K05506//C-X-C motif chemokine 5/6+ko05133//Pertussis+ko04657//IL-17 signaling pathway+ko05323//Rheumatoid arthritis+ko04062//Chemokine signaling pathway+ko04060//Cytokine-cytokine receptor interaction
227619	0	0.37	5.20945	1.22028e-14	2.26662e-15	Man1b1	GO:0006511//ubiquitin-dependent protein catabolic process;GO:1904382//mannose trimming involved in glycoprotein ERAD pathway;GO:0044238//primary metabolic process;GO:1901700//response to oxygen-containing compound;GO:0030433//ubiquitin-dependent ERAD pathway;GO:0042221//response to chemical;GO:0097466//ubiquitin-dependent glycoprotein ERAD pathway;GO:0043170//macromolecule metabolic process;GO:00…	K01230//mannosyl-oligosaccharide alpha-1,2-mannosidase [EC:3.2.1.113]+ko04141//Protein processing in endoplasmic reticulum+ko00510//N-Glycan biosynthesis+ko01100//Metabolic pathways;K01230//mannosyl-oligosaccharide alpha-1,2-mannosidase [EC:3.2.1.113]+ko04141//Protein processing in endoplasmic reticulum+ko00510//N-Glycan biosynthesis+ko01100//Metabolic pathways
545762	0	0.36	5.16993	1.6081e-07	4.9242e-08	Gm16367	GO:0010468//regulation of gene expression;GO:0009892//negative regulation of metabolic process;GO:0009890//negative regulation of biosynthetic process;GO:0019222//regulation of metabolic process;GO:0080090//regulation of primary metabolic process;GO:0048522//positive regulation of cellular process;GO:0045595//regulation of cell differentiation;GO:0009889//regulation of biosynthetic process;GO:005…	K10308//F-box protein 31;K14284//nuclear RNA export factor+ko03013//RNA transport+ko03015//mRNA surveillance pathway+ko03008//Ribosome biogenesis in eukaryotes+ko05164//Influenza A+ko05168//Herpes simplex infection
83770	0	0.36	5.16993	1.82932e-11	4.13284e-12	Tas1r2	GO:0050789//regulation of biological process;GO:0051781//positive regulation of cell division;GO:0042221//response to chemical;GO:0032467//positive regulation of cytokinesis;GO:0007600//sensory perception;GO:0050909//sensory perception of taste;GO:0065007//biological regulation;GO:0050877//nervous system process;GO:0007606//sensory perception of chemical stimulus;GO:0003008//system process;GO:004…	K04625//taste receptor type 1 member 2+ko04973//Carbohydrate digestion and absorption+ko04742//Taste transduction
16548	0	0.35	5.12928	1.08263e-05	3.93106e-06	Khk	GO:0044238//primary metabolic process;GO:0009132//nucleoside diphosphate metabolic process;GO:0070873//regulation of glycogen metabolic process;GO:0006793//phosphorus metabolic process;GO:0009743//response to carbohydrate;GO:0019222//regulation of metabolic process;GO:0006081//cellular aldehyde metabolic process;GO:0009259//ribonucleotide metabolic process;GO:0055086//nucleobase-containing small …	K00846//ketohexokinase [EC:2.7.1.3]+ko00051//Fructose and mannose metabolism+ko01100//Metabolic pathways
234407	0	0.35	5.12928	1.82983e-11	4.13284e-12	Colgalt1	GO:1902903//regulation of supramolecular fiber organization;GO:1903053//regulation of extracellular matrix organization;GO:0048518//positive regulation of biological process;GO:1902905//positive regulation of supramolecular fiber organization;GO:0065007//biological regulation;GO:0050794//regulation of cellular process;GO:1904026//regulation of collagen fibril organization;GO:1903055//positive reg…	K11703//collagen beta-1,O-galactosyltransferase [EC:2.4.1.50]+ko00514//Other types of O-glycan biosynthesis+ko00310//Lysine degradation;K11703//collagen beta-1,O-galactosyltransferase [EC:2.4.1.50]+ko00514//Other types of O-glycan biosynthesis+ko00310//Lysine degradation
79565	0.01	0.35	5.12928	3.66004e-08	1.06581e-08	Wbscr27
81535	0	0.35	5.12928	2.94237e-12	6.32456e-13	Sgpp1	GO:0044281//small molecule metabolic process;GO:0006629//lipid metabolic process;GO:1901615//organic hydroxy compound metabolic process;GO:0006665//sphingolipid metabolic process;GO:0050789//regulation of biological process;GO:0071704//organic substance metabolic process;GO:0097164//ammonium ion metabolic process;GO:0097193//intrinsic apoptotic signaling pathway;GO:0019637//organophosphate metabo…	K04716//sphingosine-1-phosphate phosphatase 1 [EC:3.1.3.-]+ko04071//Sphingolipid signaling pathway+ko00600//Sphingolipid metabolism
434903	0	0.34	5.08746	1.42808e-08	4.03068e-09	Mageb4	GO:0044464//cell part;GO:0005737//cytoplasm;GO:0044424//intracellular part;GO:0005623//cell;GO:0005622//intracellular;	K22823//non-structural maintenance of chromosomes element 3
545562	0	0.34	5.08746	3.54859e-05	1.374e-05	Amy2b		K01176//alpha-amylase [EC:3.2.1.1]+ko00500//Starch and sucrose metabolism+ko04973//Carbohydrate digestion and absorption+ko01100//Metabolic pathways
97848	0	0.33	5.04439	6.41083e-05	2.56878e-05	Serpinb6c	GO:0005615//extracellular space;GO:0044464//cell part;GO:0005576//extracellular region;GO:0044424//intracellular part;GO:0044421//extracellular region part;GO:0005737//cytoplasm;GO:0005622//intracellular;GO:0005623//cell;GO:0030414//peptidase inhibitor activity;GO:0061134//peptidase regulator activity;GO:0004866//endopeptidase inhibitor activity;GO:0004857//enzyme inhibitor activity;GO:0004867//s…	K13963//serpin B+ko05146//Amoebiasis
236574	0.02	0.64	5	9.16315e-14	1.78408e-14	Smok2b	GO:0044238//primary metabolic process;GO:0044267//cellular protein metabolic process;GO:0050896//response to stimulus;GO:0018193//peptidyl-amino acid modification;GO:0006325//chromatin organization;GO:0023052//signaling;GO:0016572//histone phosphorylation;GO:0023051//regulation of signaling;GO:0009968//negative regulation of signal transduction;GO:0006793//phosphorus metabolic process;GO:0009267/…	K08798//MAP/microtubule affinity-regulating kinase [EC:2.7.11.1]
29812	0.01	0.32	5	6.54646e-08	1.93896e-08	Ndrg3	GO:0009987//cellular process;GO:0065007//biological regulation;GO:0007165//signal transduction;GO:0050896//response to stimulus;GO:0023052//signaling;GO:0050789//regulation of biological process;GO:0007154//cell communication;GO:0050794//regulation of cellular process;GO:0051716//cellular response to stimulus;GO:0005576//extracellular region;GO:0005737//cytoplasm;GO:0005623//cell;GO:0043226//orga…	K18266//protein NDRG1
241633	0	0.31	4.9542	4.73918e-13	9.67862e-14	Atp8b4	GO:0006996//organelle organization;GO:0071840//cellular component organization or biogenesis;GO:0016043//cellular component organization;GO:0007030//Golgi organization;GO:0009987//cellular process;GO:0010256//endomembrane system organization;GO:0044464//cell part;GO:0005794//Golgi apparatus;GO:0043231//intracellular membrane-bounded organelle;GO:0071944//cell periphery;GO:0044424//intracellular p…	K01530//phospholipid-translocating ATPase [EC:3.6.3.1];K01530//phospholipid-translocating ATPase [EC:3.6.3.1];K01530//phospholipid-translocating ATPase [EC:3.6.3.1];K01530//phospholipid-translocating ATPase [EC:3.6.3.1]
380702	0	0.31	4.9542	5.94466e-06	2.10266e-06	Shisa6	GO:0065007//biological regulation;GO:0048168//regulation of neuronal synaptic plasticity;GO:0050789//regulation of biological process;GO:0010646//regulation of cell communication;GO:0050804//modulation of chemical synaptic transmission;GO:0048172//regulation of short-term neuronal synaptic plasticity;GO:0099177//regulation of trans-synaptic signaling;GO:0065008//regulation of biological quality;G…	K08458//G protein-coupled receptor 116;K08458//G protein-coupled receptor 116
116914	0.01	0.3	4.90689	3.49782e-10	8.67892e-11	Slc19a2	GO:0051179//localization;GO:0042493//response to drug;GO:0072348//sulfur compound transport;GO:0042221//response to chemical;GO:0071705//nitrogen compound transport;GO:0045117//azole transport;GO:0015893//drug transport;GO:0006810//transport;GO:0015888//thiamine transport;GO:0071702//organic substance transport;GO:0051234//establishment of localization;GO:0050896//response to stimulus;GO:0051180/…	K14610//solute carrier family 19 (thiamine transporter), member 2/3+ko04977//Vitamin digestion and absorption
11810	0	0.3	4.90689	5.38128e-07	1.72113e-07	Apobec1	GO:0016070//RNA metabolic process;GO:0051254//positive regulation of RNA metabolic process;GO:0048255//mRNA stabilization;GO:0009451//RNA modification;GO:0045893//positive regulation of transcription, DNA-templated;GO:0070988//demethylation;GO:0035510//DNA dealkylation;GO:0016554//cytidine to uridine editing;GO:0016071//mRNA metabolic process;GO:0090304//nucleic acid metabolic process;GO:0042127/…	K16932//C->U-editing enzyme APOBEC1 [EC:3.5.4.36]
320091	0.01	0.3	4.90689	6.7297e-12	1.472e-12	Ano4	GO:0016043//cellular component organization;GO:0065007//biological regulation;GO:0061590//calcium activated phosphatidylcholine scrambling;GO:0010256//endomembrane system organization;GO:0061589//calcium activated phosphatidylserine scrambling;GO:0097035//regulation of membrane lipid distribution;GO:0009987//cellular process;GO:0061591//calcium activated galactosylceramide scrambling;GO:0071840//…	K19499//anoctamin-4;K19499//anoctamin-4;K19499//anoctamin-4;K19499//anoctamin-4;K19499//anoctamin-4;K19499//anoctamin-4;K19499//anoctamin-4;K19499//anoctamin-4;K19499//anoctamin-4
668894	0.01	0.3	4.90689	4.66375e-15	8.47152e-16	Gm14025	GO:0022610//biological adhesion;GO:0007155//cell adhesion;GO:0008092//cytoskeletal protein binding;GO:0005515//protein binding;GO:0003779//actin binding;GO:0005488//binding;GO:0051015//actin filament binding;GO:0044877//macromolecular complex binding;GO:0032403//protein complex binding;	K06585//integrin alpha 9+ko05414//Dilated cardiomyopathy (DCM)+ko05410//Hypertrophic cardiomyopathy (HCM)+ko05412//Arrhythmogenic right ventricular cardiomyopathy (ARVC)+ko04810//Regulation of actin cytoskeleton+ko04512//ECM-receptor interaction+ko04510//Focal adhesion+ko04514//Cell adhesion molecules (CAMs)+ko04151//PI3K-Akt signaling pathway+ko05165//Human papillomavirus infection;K05691//caten…
102902673	0	0.29	4.85798	1.4284e-08	4.03068e-09	Gm21992	GO:0007165//signal transduction;GO:0008104//protein localization;GO:0048856//anatomical structure development;GO:0036211//protein modification process;GO:0046626//regulation of insulin receptor signaling pathway;GO:0009648//photoperiodism;GO:0032940//secretion by cell;GO:0030154//cell differentiation;GO:0033043//regulation of organelle organization;GO:0051171//regulation of nitrogen compound meta…	K13187//RNA-binding protein 4
13992	0.06	1.74	4.85798	3.65224e-26	4.06572e-27	Khdrbs3	GO:0044249//cellular biosynthetic process;GO:0044237//cellular metabolic process;GO:0043933//macromolecular complex subunit organization;GO:0006355//regulation of transcription, DNA-templated;GO:0051171//regulation of nitrogen compound metabolic process;GO:0010556//regulation of macromolecule biosynthetic process;GO:0034641//cellular nitrogen compound metabolic process;GO:0006351//transcription, …	K14942//KH domain-containing, RNA-binding, signal transduction-associated protein 3
209176	0	0.29	4.85798	7.79894e-09	2.15596e-09	Ido2	GO:0042430//indole-containing compound metabolic process;GO:0042402//cellular biogenic amine catabolic process;GO:0042436//indole-containing compound catabolic process;GO:0043436//oxoacid metabolic process;GO:1901360//organic cyclic compound metabolic process;GO:0009310//amine catabolic process;GO:0016054//organic acid catabolic process;GO:0044237//cellular metabolic process;GO:0006082//organic a…	K00463//indoleamine 2,3-dioxygenase [EC:1.13.11.52]+ko05143//African trypanosomiasis+ko00380//Tryptophan metabolism+ko01100//Metabolic pathways
17287	0	0.28	4.80735	7.80072e-09	2.15596e-09	Mep1a	GO:0005576//extracellular region;GO:0032991//macromolecular complex;GO:0043234//protein complex;GO:0098796//membrane protein complex;GO:0031982//vesicle;GO:0043226//organelle;GO:0044425//membrane part;GO:0043227//membrane-bounded organelle;GO:0016021//integral component of membrane;GO:0044421//extracellular region part;GO:0043230//extracellular organelle;GO:0016020//membrane;GO:1903561//extracell…	K01395//meprin A [EC:3.4.24.18]+ko04974//Protein digestion and absorption
30051	0	0.28	4.80735	0.000210521	8.9785e-05	Spdef	GO:0010454//negative regulation of cell fate commitment;GO:0010468//regulation of gene expression;GO:0009059//macromolecule biosynthetic process;GO:0060576//intestinal epithelial cell development;GO:1901360//organic cyclic compound metabolic process;GO:0009890//negative regulation of biosynthetic process;GO:0010604//positive regulation of macromolecule metabolic process;GO:0010558//negative regul…	K09442//SAM pointed domain-containing ETS transcription factor
17083	0	0.27	4.75489	0.000210677	8.9785e-05	Tmed1	GO:0015031//protein transport;GO:0045184//establishment of protein localization;GO:0071705//nitrogen compound transport;GO:0015833//peptide transport;GO:0051234//establishment of localization;GO:0051179//localization;GO:0033036//macromolecule localization;GO:0042886//amide transport;GO:0008104//protein localization;GO:0006810//transport;GO:0071702//organic substance transport;GO:0016020//membrane…	K20348//p24 family protein gamma-1
213234	0	0.27	4.75489	1.08282e-05	3.93106e-06	Zbbx	GO:0005622//intracellular;GO:0005623//cell;GO:0044464//cell part;GO:0043167//ion binding;GO:0005488//binding;GO:0046872//metal ion binding;GO:0043169//cation binding;GO:0046914//transition metal ion binding;GO:0008270//zinc ion binding;	K03006//DNA-directed RNA polymerase II subunit RPB1 [EC:2.7.7.6]+ko00230//Purine metabolism+ko03020//RNA polymerase+ko00240//Pyrimidine metabolism+ko05016//Huntington's disease+ko01100//Metabolic pathways+ko05169//Epstein-Barr virus infection+ko05168//Herpes simplex infection
216864	0	0.27	4.75489	0.000210552	8.9785e-05	Mgl2	GO:0016021//integral component of membrane;GO:0031224//intrinsic component of membrane;GO:0016020//membrane;GO:0044425//membrane part;GO:0030246//carbohydrate binding;GO:0005488//binding;	K06721//C-type lectin domain family 10 member A
100040854	0	0.26	4.70044	1.08188e-05	3.93106e-06	Gm13040	GO:1903506//regulation of nucleic acid-templated transcription;GO:0060548//negative regulation of cell death;GO:2000112//regulation of cellular macromolecule biosynthetic process;GO:0010556//regulation of macromolecule biosynthetic process;GO:0006355//regulation of transcription, DNA-templated;GO:0019219//regulation of nucleobase-containing compound metabolic process;GO:0048518//positive regulati…	K10308//F-box protein 31;K14284//nuclear RNA export factor+ko03013//RNA transport+ko03015//mRNA surveillance pathway+ko03008//Ribosome biogenesis in eukaryotes+ko05164//Influenza A+ko05168//Herpes simplex infection
100040861	0	0.26	4.70044	1.08301e-05	3.93106e-06	Gm13057	GO:0045934//negative regulation of nucleobase-containing compound metabolic process;GO:0050794//regulation of cellular process;GO:0045596//negative regulation of cell differentiation;GO:0048523//negative regulation of cellular process;GO:0031324//negative regulation of cellular metabolic process;GO:0008284//positive regulation of cell proliferation;GO:0010605//negative regulation of macromolecule…	K10308//F-box protein 31;K14284//nuclear RNA export factor+ko03013//RNA transport+ko03015//mRNA surveillance pathway+ko03008//Ribosome biogenesis in eukaryotes+ko05164//Influenza A+ko05168//Herpes simplex infection
217378	0.01	0.26	4.70044	1.86716e-11	4.22068e-12	Dnajc27	GO:0050794//regulation of cellular process;GO:0070372//regulation of ERK1 and ERK2 cascade;GO:0050789//regulation of biological process;GO:0048583//regulation of response to stimulus;GO:0010647//positive regulation of cell communication;GO:0051246//regulation of protein metabolic process;GO:0051171//regulation of nitrogen compound metabolic process;GO:0032879//regulation of localization;GO:003288…	K19372//DnaJ homolog subfamily C member 27
83691	0	0.26	4.70044	3.78985e-10	9.43938e-11	Crispld1	GO:0060323//head morphogenesis;GO:0032502//developmental process;GO:0060324//face development;GO:0060322//head development;GO:0060325//face morphogenesis;GO:0048856//anatomical structure development;GO:0010171//body morphogenesis;GO:0009653//anatomical structure morphogenesis;GO:0044421//extracellular region part;GO:0005576//extracellular region;GO:0043230//extracellular organelle;GO:1903561//ext…	K19919//cysteine-rich secretory protein;K19919//cysteine-rich secretory protein;K19919//cysteine-rich secretory protein
102632837	0	0.25	4.64386	0.000682156	0.000313822	Rnf212b	GO:0007059//chromosome segregation;GO:1901564//organonitrogen compound metabolic process;GO:0006807//nitrogen compound metabolic process;GO:0006464//cellular protein modification process;GO:1903046//meiotic cell cycle process;GO:0007049//cell cycle;GO:0043170//macromolecule metabolic process;GO:0008152//metabolic process;GO:0016925//protein sumoylation;GO:0044237//cellular metabolic process;GO:00…	K09379//zinc finger homeobox protein 2;K10330//ankyrin repeat and SOCS box protein 8;K09379//zinc finger homeobox protein 2;K10330//ankyrin repeat and SOCS box protein 8
12162	0	0.25	4.64386	6.9741e-10	1.76475e-10	Bmp7	GO:0007409//axonogenesis;GO:0022008//neurogenesis;GO:0007275//multicellular organism development;GO:0000902//cell morphogenesis;GO:0120036//plasma membrane bounded cell projection organization;GO:0030154//cell differentiation;GO:0048812//neuron projection morphogenesis;GO:0009605//response to external stimulus;GO:0032501//multicellular organismal process;GO:0120039//plasma membrane bounded cell p…	K16621//bone morphogenetic protein 7+ko04390//Hippo signaling pathway+ko04360//Axon guidance+ko04350//TGF-beta signaling pathway+ko04060//Cytokine-cytokine receptor interaction
217674	0	0.25	4.64386	0.000378685	0.000167858	Gphb5	GO:0009987//cellular process;GO:0009893//positive regulation of metabolic process;GO:0007267//cell-cell signaling;GO:0050896//response to stimulus;GO:0010562//positive regulation of phosphorus metabolic process;GO:0007165//signal transduction;GO:0019219//regulation of nucleobase-containing compound metabolic process;GO:0031328//positive regulation of cellular biosynthetic process;GO:0009755//horm…
26465	0	0.25	4.64386	1.08244e-05	3.93106e-06	Zfp146	GO:1903506//regulation of nucleic acid-templated transcription;GO:0010468//regulation of gene expression;GO:0080090//regulation of primary metabolic process;GO:0031326//regulation of cellular biosynthetic process;GO:0006355//regulation of transcription, DNA-templated;GO:0060255//regulation of macromolecule metabolic process;GO:0065007//biological regulation;GO:0051171//regulation of nitrogen comp…	K09228//KRAB domain-containing zinc finger protein
105244717	0	0.24	4.58496	0.000378954	0.000167858	Gm40275		K08815//tau tubulin kinase [EC:2.7.11.26];K13912//deleted in malignant brain tumors 1 protein+ko04970//Salivary secretion
268481	0	0.24	4.58496	5.38234e-07	1.72113e-07	Krt222	GO:0099513//polymeric cytoskeletal fiber;GO:0043228//non-membrane-bounded organelle;GO:0044430//cytoskeletal part;GO:0005622//intracellular;GO:0045111//intermediate filament cytoskeleton;GO:0043226//organelle;GO:0005856//cytoskeleton;GO:0005623//cell;GO:0044422//organelle part;GO:0043232//intracellular non-membrane-bounded organelle;GO:0005882//intermediate filament;GO:0099512//supramolecular fib…	K07604//type I keratin, acidic+ko04915//Estrogen signaling pathway
71738	0	0.24	4.58496	1.42712e-08	4.03068e-09	Mamdc2	GO:1903510//mucopolysaccharide metabolic process;GO:0006022//aminoglycan metabolic process;GO:1901135//carbohydrate derivative metabolic process;GO:0006029//proteoglycan metabolic process;GO:0044238//primary metabolic process;GO:0018209//peptidyl-serine modification;GO:0030203//glycosaminoglycan metabolic process;GO:0006082//organic acid metabolic process;GO:0008152//metabolic process;GO:0006790/…	K01316//enterokinase [EC:3.4.21.9];K22453//trefoil factor 2
101055671	0	0.23	4.52356	0.000116001	4.80248e-05	Lipo2	GO:0016042//lipid catabolic process;GO:0009056//catabolic process;GO:1901575//organic substance catabolic process;GO:0044238//primary metabolic process;GO:0071704//organic substance metabolic process;GO:0006629//lipid metabolic process;GO:0008152//metabolic process;GO:0016788//hydrolase activity, acting on ester bonds;GO:0003824//catalytic activity;GO:0016787//hydrolase activity;	K14452//gastric triacylglycerol lipase [EC:3.1.1.3]+ko04975//Fat digestion and absorption+ko00561//Glycerolipid metabolism+ko01100//Metabolic pathways
107765	0	0.23	4.52356	0.000210645	8.9785e-05	Ankrd1	GO:0043516//regulation of DNA damage response, signal transduction by p53 class mediator;GO:0006950//response to stress;GO:0048518//positive regulation of biological process;GO:0031327//negative regulation of cellular biosynthetic process;GO:1902531//regulation of intracellular signal transduction;GO:0071347//cellular response to interleukin-1;GO:0010605//negative regulation of macromolecule meta…	K21433//ankyrin repeat domain-containing protein 1
26359	0	0.23	4.52356	0.000116037	4.80248e-05	Anxa10	GO:0044464//cell part;GO:0043226//organelle;GO:0044444//cytoplasmic part;GO:0005739//mitochondrion;GO:0043227//membrane-bounded organelle;GO:0043229//intracellular organelle;GO:0005622//intracellular;GO:0005623//cell;GO:0043231//intracellular membrane-bounded organelle;GO:0005737//cytoplasm;GO:0044424//intracellular part;GO:0046872//metal ion binding;GO:0005509//calcium ion binding;GO:0005544//ca…	K17097//annexin A10
621603	0	0.23	4.52356	1.95904e-05	7.34932e-06	Aldh3b2	GO:0006081//cellular aldehyde metabolic process;GO:0009987//cellular process;GO:0008152//metabolic process;GO:0071704//organic substance metabolic process;GO:0044281//small molecule metabolic process;GO:0017144//drug metabolic process;GO:0046164//alcohol catabolic process;GO:0006068//ethanol catabolic process;GO:0044282//small molecule catabolic process;GO:1901575//organic substance catabolic pro…	K00129//aldehyde dehydrogenase (NAD(P)+) [EC:1.2.1.5]+ko00410//beta-Alanine metabolism+ko00980//Metabolism of xenobiotics by cytochrome P450+ko00982//Drug metabolism - cytochrome P450+ko00340//Histidine metabolism+ko00010//Glycolysis / Gluconeogenesis+ko05204//Chemical carcinogenesis+ko00360//Phenylalanine metabolism+ko00350//Tyrosine metabolism+ko01100//Metabolic pathways
70426	0	0.23	4.52356	0.000210427	8.9785e-05	Tekt5	GO:0016043//cellular component organization;GO:0007018//microtubule-based movement;GO:0009987//cellular process;GO:0030030//cell projection organization;GO:0060285//cilium-dependent cell motility;GO:0006928//movement of cell or subcellular component;GO:0006996//organelle organization;GO:0030317//flagellated sperm motility;GO:0120031//plasma membrane bounded cell projection assembly;GO:0060271//ci…	K18632//tektin-5
110058	0	0.22	4.45943	3.25577e-06	1.12468e-06	Syt17	GO:0048791//calcium ion-regulated exocytosis of neurotransmitter;GO:0048639//positive regulation of developmental growth;GO:0009987//cellular process;GO:0051648//vesicle localization;GO:0016079//synaptic vesicle exocytosis;GO:0048869//cellular developmental process;GO:0023052//signaling;GO:0120035//regulation of plasma membrane bounded cell projection organization;GO:0051046//regulation of secret…	K19915//synaptotagmin-17
15957	0	0.22	4.45943	3.2528e-06	1.12468e-06	Ifit1	GO:0009615//response to virus;GO:0035457//cellular response to interferon-alpha;GO:0009607//response to biotic stimulus;GO:0051707//response to other organism;GO:0051704//multi-organism process;GO:0051716//cellular response to stimulus;GO:0098542//defense response to other organism;GO:0070887//cellular response to chemical stimulus;GO:0043207//response to external biotic stimulus;GO:0035456//resp…	K14217//interferon-induced protein with tetratricopeptide repeats 1+ko05160//Hepatitis C+ko05168//Herpes simplex infection
18514	0	0.22	4.45943	1.40492e-13	2.76908e-14	Pbx1	GO:0051241//negative regulation of multicellular organismal process;GO:0035019//somatic stem cell population maintenance;GO:0022008//neurogenesis;GO:0060675//ureteric bud morphogenesis;GO:1901360//organic cyclic compound metabolic process;GO:0003006//developmental process involved in reproduction;GO:0032502//developmental process;GO:0035108//limb morphogenesis;GO:0072006//nephron development;GO:0…	K09355//pre-B-cell leukemia transcription factor 1+ko05202//Transcriptional misregulation in cancer+ko04934//Cushing's syndrome+ko04927//Cortisol synthesis and secretion
208994	0	0.22	4.45943	4.79848e-08	1.40882e-08	Fam83b	GO:0009987//cellular process;GO:0007167//enzyme linked receptor protein signaling pathway;GO:0050789//regulation of biological process;GO:0007173//epidermal growth factor receptor signaling pathway;GO:0051716//cellular response to stimulus;GO:0023052//signaling;GO:0038127//ERBB signaling pathway;GO:0007166//cell surface receptor signaling pathway;GO:0050794//regulation of cellular process;GO:0065…	K16805//protein FAM83D
26397	0.03	0.66	4.45943	2.10947e-11	4.78838e-12	Map2k3	GO:0051252//regulation of RNA metabolic process;GO:0032502//developmental process;GO:0003013//circulatory system process;GO:0003008//system process;GO:0070887//cellular response to chemical stimulus;GO:0033674//positive regulation of kinase activity;GO:0006793//phosphorus metabolic process;GO:0009889//regulation of biosynthetic process;GO:0009617//response to bacterium;GO:0033993//response to lip…	K04432//mitogen-activated protein kinase kinase 3 [EC:2.7.12.2]+ko05014//Amyotrophic lateral sclerosis (ALS)+ko04218//Cellular senescence+ko04912//GnRH signaling pathway+ko04668//TNF signaling pathway+ko04664//Fc epsilon RI signaling pathway+ko04714//Thermogenesis+ko05145//Toxoplasmosis+ko04620//Toll-like receptor signaling pathway+ko04624//Toll and Imd signaling pathway+ko04750//Inflammatory med…
100041639	0.18	3.85	4.41879	7.40234e-23	9.40758e-24	Gm3448	GO:0007017//microtubule-based process;GO:0051234//establishment of localization;GO:0051179//localization;GO:0007018//microtubule-based movement;GO:0006810//transport;GO:0009987//cellular process;GO:0006928//movement of cell or subcellular component;GO:0099513//polymeric cytoskeletal fiber;GO:0019898//extrinsic component of membrane;GO:0043226//organelle;GO:0097223//sperm part;GO:0044422//organell…	K22197//BRG1-associated factor 45A+ko05225//Hepatocellular carcinoma;K18631//tektin-4
15478	0.01	0.21	4.39232	7.8025e-09	2.15596e-09	Hs3st3a1	GO:0005794//Golgi apparatus;GO:0044422//organelle part;GO:0043226//organelle;GO:0043227//membrane-bounded organelle;GO:0044424//intracellular part;GO:0031090//organelle membrane;GO:0043229//intracellular organelle;GO:0043231//intracellular membrane-bounded organelle;GO:0044444//cytoplasmic part;GO:0000139//Golgi membrane;GO:0031224//intrinsic component of membrane;GO:0016021//integral component o…	K07809//[heparan sulfate]-glucosamine 3-sulfotransferase 3 [EC:2.8.2.30]+ko00534//Glycosaminoglycan biosynthesis - heparan sulfate / heparin
27226	0	0.21	4.39232	0.000682343	0.000313822	Pla2g7	GO:0034369//plasma lipoprotein particle remodeling;GO:0019637//organophosphate metabolic process;GO:0071704//organic substance metabolic process;GO:0048584//positive regulation of response to stimulus;GO:0050920//regulation of chemotaxis;GO:0006644//phospholipid metabolic process;GO:0008152//metabolic process;GO:0040012//regulation of locomotion;GO:0050921//positive regulation of chemotaxis;GO:00…	K01062//platelet-activating factor acetylhydrolase [EC:3.1.1.47]+ko00565//Ether lipid metabolism+ko01100//Metabolic pathways
272428	0	0.21	4.39232	6.41588e-05	2.56878e-05	Acsm5	GO:0044238//primary metabolic process;GO:0006631//fatty acid metabolic process;GO:0008610//lipid biosynthetic process;GO:0046394//carboxylic acid biosynthetic process;GO:0006629//lipid metabolic process;GO:0006633//fatty acid biosynthetic process;GO:0032787//monocarboxylic acid metabolic process;GO:0044255//cellular lipid metabolic process;GO:0044283//small molecule biosynthetic process;GO:001975…	K01896//medium-chain acyl-CoA synthetase [EC:6.2.1.2]+ko00650//Butanoate metabolism+ko01100//Metabolic pathways
381058	0	0.21	4.39232	5.94572e-06	2.10266e-06	Unc93a	GO:0005623//cell;GO:0044425//membrane part;GO:0044464//cell part;GO:0071944//cell periphery;GO:0016020//membrane;GO:0005886//plasma membrane;GO:0016021//integral component of membrane;GO:0031224//intrinsic component of membrane;	K16600//tubulin polyglutamylase TTLL2 [EC:6.-.-.-]
432964	0	0.21	4.39232	0.00037917	0.000167858	K230010J24Rik		K15700//E3 ubiquitin-protein ligase RNF146 [EC:2.3.2.27];K16628//collagen, type VII, alpha+ko04974//Protein digestion and absorption
54195	0	0.21	4.39232	2.94635e-07	9.20606e-08	Gucy1b3	GO:0006164//purine nucleotide biosynthetic process;GO:0071731//response to nitric oxide;GO:0006725//cellular aromatic compound metabolic process;GO:0007165//signal transduction;GO:1901137//carbohydrate derivative biosynthetic process;GO:0051716//cellular response to stimulus;GO:0071241//cellular response to inorganic substance;GO:0099550//trans-synaptic signaling, modulating synaptic transmission…	K12319//guanylate cyclase soluble subunit beta [EC:4.6.1.2]+ko04022//cGMP-PKG signaling pathway+ko04730//Long-term depression+ko00230//Purine metabolism+ko04611//Platelet activation+ko04713//Circadian entrainment+ko04540//Gap junction+ko04970//Salivary secretion+ko04270//Vascular smooth muscle contraction+ko04921//Oxytocin signaling pathway+ko04924//Renin secretion
70840	0	0.21	4.39232	0.000378631	0.000167858	Slc22a16	GO:0019953//sexual reproduction;GO:0097722//sperm motility;GO:0006811//ion transport;GO:0071705//nitrogen compound transport;GO:0015697//quaternary ammonium group transport;GO:0015879//carnitine transport;GO:0032502//developmental process;GO:0000003//reproduction;GO:0051704//multi-organism process;GO:0015696//ammonium transport;GO:0007338//single fertilization;GO:0009566//fertilization;GO:0030154…	K08212//MFS transporter, OCT family, solute carrier family 22 (organic cation transporter), member 16
74134	0	0.21	4.39232	5.9436e-06	2.10266e-06	Cyp2s1	GO:0043436//oxoacid metabolic process;GO:0019369//arachidonic acid metabolic process;GO:0044255//cellular lipid metabolic process;GO:0008152//metabolic process;GO:0006629//lipid metabolic process;GO:0019373//epoxygenase P450 pathway;GO:0006690//icosanoid metabolic process;GO:1901568//fatty acid derivative metabolic process;GO:0071704//organic substance metabolic process;GO:0019752//carboxylic aci…	K07420//cytochrome P450 family 2 subfamily S polypeptide 1 [EC:1.14.14.1]+ko00980//Metabolism of xenobiotics by cytochrome P450+ko00830//Retinol metabolism+ko01100//Metabolic pathways
78753	0	0.21	4.39232	0.00011609	4.80248e-05	Lipm	GO:0071704//organic substance metabolic process;GO:0044238//primary metabolic process;GO:0008152//metabolic process;GO:0006629//lipid metabolic process;GO:0016042//lipid catabolic process;GO:1901575//organic substance catabolic process;GO:0009056//catabolic process;GO:0005576//extracellular region;GO:0016787//hydrolase activity;GO:0016788//hydrolase activity, acting on ester bonds;GO:0003824//cat…	K19406//lipase-like abhydrolase domain-containing protein 3 [EC:3.1.1.-];K19406//lipase-like abhydrolase domain-containing protein 3 [EC:3.1.1.-];K19406//lipase-like abhydrolase domain-containing protein 3 [EC:3.1.1.-];K19406//lipase-like abhydrolase domain-containing protein 3 [EC:3.1.1.-]
83454	0	0.21	4.39232	1.95937e-05	7.34932e-06	Nxf2	GO:0051179//localization;GO:0051169//nuclear transport;GO:0071702//organic substance transport;GO:0070727//cellular macromolecule localization;GO:0071427//mRNA-containing ribonucleoprotein complex export from nucleus;GO:0051236//establishment of RNA localization;GO:0006913//nucleocytoplasmic transport;GO:0051649//establishment of localization in cell;GO:0051028//mRNA transport;GO:0010467//gene ex…	K14284//nuclear RNA export factor+ko03013//RNA transport+ko03015//mRNA surveillance pathway+ko03008//Ribosome biogenesis in eukaryotes+ko05164//Influenza A+ko05168//Herpes simplex infection
102634841	0	0.2	4.32193	6.4179e-05	2.56878e-05	Gm38469		K11765//AT-rich interactive domain-containing protein 2+ko05225//Hepatocellular carcinoma;K06236//collagen, type I, alpha+ko04512//ECM-receptor interaction+ko04510//Focal adhesion+ko04933//AGE-RAGE signaling pathway in diabetic complications+ko04611//Platelet activation+ko05146//Amoebiasis+ko04974//Protein digestion and absorption+ko04151//PI3K-Akt signaling pathway+ko04926//Relaxin signaling pat…
108899	0	0.2	4.32193	2.62068e-08	7.5356e-09	2700081O15Rik	GO:0003676//nucleic acid binding;GO:0097159//organic cyclic compound binding;GO:0005488//binding;GO:1901363//heterocyclic compound binding;	K19475//WAS/WASL-interacting protein+ko04144//Endocytosis;K19720//collagen, type III, alpha+ko04933//AGE-RAGE signaling pathway in diabetic complications+ko04611//Platelet activation+ko05146//Amoebiasis+ko04974//Protein digestion and absorption+ko04926//Relaxin signaling pathway
18783	0.03	0.6	4.32193	3.77817e-14	7.20604e-15	Pla2g4a	GO:0019752//carboxylic acid metabolic process;GO:0016053//organic acid biosynthetic process;GO:0051234//establishment of localization;GO:0044248//cellular catabolic process;GO:0071715//icosanoid transport;GO:0050482//arachidonic acid secretion;GO:0044242//cellular lipid catabolic process;GO:0016042//lipid catabolic process;GO:0044249//cellular biosynthetic process;GO:1901568//fatty acid derivativ…	K16342//cytosolic phospholipase A2 [EC:3.1.1.4]+ko04730//Long-term depression+ko04217//Necroptosis+ko04072//Phospholipase D signaling pathway+ko04913//Ovarian steroidogenesis+ko04912//GnRH signaling pathway+ko04724//Glutamatergic synapse+ko04726//Serotonergic synapse+ko00590//Arachidonic acid metabolism+ko04611//Platelet activation+ko04664//Fc epsilon RI signaling pathway+ko04750//Inflammatory me…
242286	0	0.2	4.32193	0.000683187	0.000313822	Sdr16c6	GO:0016491//oxidoreductase activity;GO:0003824//catalytic activity;	K15734//all-trans-retinol dehydrogenase (NAD+) [EC:1.1.1.105]+ko00830//Retinol metabolism
382118	0	0.2	4.32193	1.95871e-05	7.34932e-06	Zkscan7	GO:0031326//regulation of cellular biosynthetic process;GO:0032774//RNA biosynthetic process;GO:0044237//cellular metabolic process;GO:0006355//regulation of transcription, DNA-templated;GO:0051252//regulation of RNA metabolic process;GO:0090304//nucleic acid metabolic process;GO:1903506//regulation of nucleic acid-templated transcription;GO:0050789//regulation of biological process;GO:0009889//r…	K09228//KRAB domain-containing zinc finger protein
433486	0	0.2	4.32193	1.08207e-05	3.93106e-06	Gm14151	GO:0006950//response to stress;GO:0018193//peptidyl-amino acid modification;GO:0006807//nitrogen compound metabolic process;GO:0050794//regulation of cellular process;GO:0008152//metabolic process;GO:0010648//negative regulation of cell communication;GO:0006793//phosphorus metabolic process;GO:0031667//response to nutrient levels;GO:0009987//cellular process;GO:0023051//regulation of signaling;GO…	K08798//MAP/microtubule affinity-regulating kinase [EC:2.7.11.1]
73010	0	0.2	4.32193	6.97758e-10	1.76475e-10	Gpr22	GO:0010243//response to organonitrogen compound;GO:1901698//response to nitrogen compound;GO:0050896//response to stimulus;GO:0010033//response to organic substance;GO:0051716//cellular response to stimulus;GO:0042221//response to chemical;GO:0071495//cellular response to endogenous stimulus;GO:0009719//response to endogenous stimulus;GO:0032870//cellular response to hormone stimulus;GO:1901652//…	K04319//G protein-coupled receptor 22
17153	0	0.19	4.24793	1.08225e-05	3.93106e-06	Mal	GO:2001233//regulation of apoptotic signaling pathway;GO:0034613//cellular protein localization;GO:0043067//regulation of programmed cell death;GO:0065007//biological regulation;GO:0008366//axon ensheathment;GO:0046907//intracellular transport;GO:0033036//macromolecule localization;GO:0048583//regulation of response to stimulus;GO:0006886//intracellular protein transport;GO:0051179//localization;…
211135	0	0.19	4.24793	0.000681969	0.000313822	D130040H23Rik		K09228//KRAB domain-containing zinc finger protein
245492	0	0.19	4.24793	1.95673e-05	7.34932e-06	4930595M18Rik	GO:0097159//organic cyclic compound binding;GO:1901363//heterocyclic compound binding;GO:0003676//nucleic acid binding;GO:0003723//RNA binding;GO:0005488//binding;	K16271//E3 ubiquitin-protein ligase RLIM [EC:2.3.2.27];K12891//splicing factor, arginine/serine-rich 2+ko03040//Spliceosome+ko05168//Herpes simplex infection
245670	0	0.19	4.24793	6.41487e-05	2.56878e-05	Rragb	GO:0048584//positive regulation of response to stimulus;GO:0010647//positive regulation of cell communication;GO:0019222//regulation of metabolic process;GO:0009267//cellular response to starvation;GO:0009894//regulation of catabolic process;GO:0048518//positive regulation of biological process;GO:0010506//regulation of autophagy;GO:0010033//response to organic substance;GO:0009987//cellular proc…	K16185//Ras-related GTP-binding protein A/B+ko04140//Autophagy - animal+ko04150//mTOR signaling pathway;K16185//Ras-related GTP-binding protein A/B+ko04140//Autophagy - animal+ko04150//mTOR signaling pathway;K16185//Ras-related GTP-binding protein A/B+ko04140//Autophagy - animal+ko04150//mTOR signaling pathway
407831	0	0.19	4.24793	0.000682531	0.000313822	Tmem204	GO:0032502//developmental process;GO:0050794//regulation of cellular process;GO:0048856//anatomical structure development;GO:0048869//cellular developmental process;GO:0001945//lymph vessel development;GO:0072359//circulatory system development;GO:0030947//regulation of vascular endothelial growth factor receptor signaling pathway;GO:0048731//system development;GO:0001944//vasculature development…
71886	0	0.19	4.24793	0.000378738	0.000167858	2310002L09Rik	GO:0031032//actomyosin structure organization;GO:0030029//actin filament-based process;GO:0016043//cellular component organization;GO:0071840//cellular component organization or biogenesis;GO:0009987//cellular process;GO:0006996//organelle organization;GO:0030036//actin cytoskeleton organization;GO:0007010//cytoskeleton organization;GO:0016020//membrane;GO:0031224//intrinsic component of membrane…
432769	0.04	0.74	4.20945	6.23704e-16	1.08652e-16	Zfp708	GO:0051252//regulation of RNA metabolic process;GO:0010468//regulation of gene expression;GO:0050789//regulation of biological process;GO:0019219//regulation of nucleobase-containing compound metabolic process;GO:0006355//regulation of transcription, DNA-templated;GO:0051171//regulation of nitrogen compound metabolic process;GO:2000112//regulation of cellular macromolecule biosynthetic process;GO…	K09228//KRAB domain-containing zinc finger protein
102022	0	0.18	4.16993	0.000682437	0.000313822	Ces2a	GO:0044260//cellular macromolecule metabolic process;GO:0001523//retinoid metabolic process;GO:0044267//cellular protein metabolic process;GO:0034645//cellular macromolecule biosynthetic process;GO:0006807//nitrogen compound metabolic process;GO:0044238//primary metabolic process;GO:0009059//macromolecule biosynthetic process;GO:0006720//isoprenoid metabolic process;GO:0006486//protein glycosylat…	K03927//carboxylesterase 2 [EC:3.1.1.1 3.1.1.84 3.1.1.56]+ko00983//Drug metabolism - other enzymes
11603	0	0.18	4.16993	2.58522e-13	5.17696e-14	Agrn	GO:1904396//regulation of neuromuscular junction development;GO:0043068//positive regulation of programmed cell death;GO:1904062//regulation of cation transmembrane transport;GO:0002028//regulation of sodium ion transport;GO:0032409//regulation of transporter activity;GO:1903522//regulation of blood circulation;GO:0051963//regulation of synapse assembly;GO:0051962//positive regulation of nervous …	K06254//agrin+ko04512//ECM-receptor interaction
14160	0	0.18	4.16993	4.26394e-09	1.15319e-09	Lgr5	GO:0048839//inner ear development;GO:0007275//multicellular organism development;GO:0048869//cellular developmental process;GO:0061326//renal tubule development;GO:0009888//tissue development;GO:0050789//regulation of biological process;GO:0030154//cell differentiation;GO:0048522//positive regulation of cellular process;GO:0023052//signaling;GO:0001655//urogenital system development;GO:0051716//c…	K04308//leucine-rich repeat-containing G protein-coupled receptor 5
15377	0	0.18	4.16993	0.000379062	0.000167858	Foxa3	GO:0007154//cell communication;GO:0009889//regulation of biosynthetic process;GO:0022414//reproductive process;GO:0032501//multicellular organismal process;GO:0019219//regulation of nucleobase-containing compound metabolic process;GO:0010467//gene expression;GO:0031326//regulation of cellular biosynthetic process;GO:0044271//cellular nitrogen compound biosynthetic process;GO:0009059//macromolecul…	K08038//forkhead box protein A3, hepatocyte nuclear factor 3-gamma+ko04950//Maturity onset diabetes of the young
17112	0	0.18	4.16993	0.000682905	0.000313822	Tm4sf1	GO:0016020//membrane;GO:0005886//plasma membrane;GO:0044464//cell part;GO:0044425//membrane part;GO:0005887//integral component of plasma membrane;GO:0005623//cell;GO:0031224//intrinsic component of membrane;GO:0016021//integral component of membrane;GO:0031226//intrinsic component of plasma membrane;GO:0044459//plasma membrane part;GO:0071944//cell periphery;	K00681//gamma-glutamyltranspeptidase / glutathione hydrolase [EC:2.3.2.2 3.4.19.13]+ko00480//Glutathione metabolism+ko00430//Taurine and hypotaurine metabolism+ko01100//Metabolic pathways;K13624//ceruloplasmin [EC:1.16.3.1]+ko04216//Ferroptosis+ko00860//Porphyrin and chlorophyll metabolism
19017	0	0.18	4.16993	5.43712e-12	1.18241e-12	Ppargc1a	GO:0008202//steroid metabolic process;GO:0008152//metabolic process;GO:0032502//developmental process;GO:0009987//cellular process;GO:0048856//anatomical structure development;GO:1990845//adaptive thermogenesis;GO:0065008//regulation of biological quality;GO:0060612//adipose tissue development;GO:0061448//connective tissue development;GO:0007568//aging;GO:0007275//multicellular organism developme…	K07202//alpha peroxisome proliferator-activated receptor gamma coactivator 1-alpha+ko04211//Longevity regulating pathway+ko04910//Insulin signaling pathway+ko04714//Thermogenesis+ko04371//Apelin signaling pathway+ko04931//Insulin resistance+ko04152//AMPK signaling pathway+ko05016//Huntington's disease+ko04922//Glucagon signaling pathway+ko04920//Adipocytokine signaling pathway;K07202//alpha perox…
234371	0	0.18	4.16993	6.42094e-05	2.56878e-05	Tmem161a	GO:0104004//cellular response to environmental stimulus;GO:0051173//positive regulation of nitrogen compound metabolic process;GO:0034644//cellular response to UV;GO:0080134//regulation of response to stress;GO:0065007//biological regulation;GO:0050896//response to stimulus;GO:0071214//cellular response to abiotic stimulus;GO:0060548//negative regulation of cell death;GO:0048522//positive regulat…	K03283//heat shock 70kDa protein 1/2/6/8+ko03040//Spliceosome+ko04144//Endocytosis+ko04141//Protein processing in endoplasmic reticulum+ko05134//Legionellosis+ko04213//Longevity regulating pathway - multiple species+ko04915//Estrogen signaling pathway+ko04612//Antigen processing and presentation+ko05145//Toxoplasmosis+ko04010//MAPK signaling pathway+ko05162//Measles+ko05164//Influenza A+ko05169//…
234378	0	0.18	4.16993	1.08113e-05	3.93106e-06	Klhl26	GO:0061458//reproductive system development;GO:0006807//nitrogen compound metabolic process;GO:0019538//protein metabolic process;GO:0019953//sexual reproduction;GO:0048515//spermatid differentiation;GO:0032502//developmental process;GO:0032501//multicellular organismal process;GO:0048869//cellular developmental process;GO:0008152//metabolic process;GO:0048609//multicellular organismal reproducti…	K10463//kelch-like protein 26
237213	0	0.18	4.16993	1.95706e-05	7.34932e-06	Glra2	GO:0007417//central nervous system development;GO:0051716//cellular response to stimulus;GO:0022607//cellular component assembly;GO:0071361//cellular response to ethanol;GO:0023052//signaling;GO:1901698//response to nitrogen compound;GO:0032502//developmental process;GO:0009636//response to toxic substance;GO:0071229//cellular response to acid chemical;GO:0015698//inorganic anion transport;GO:007…	K05194//glycine receptor alpha-2+ko04080//Neuroactive ligand-receptor interaction
239546	0	0.18	4.16993	0.000210833	8.9785e-05	Zfp647	GO:1903506//regulation of nucleic acid-templated transcription;GO:0010556//regulation of macromolecule biosynthetic process;GO:0006807//nitrogen compound metabolic process;GO:0046483//heterocycle metabolic process;GO:0009987//cellular process;GO:0071704//organic substance metabolic process;GO:1901576//organic substance biosynthetic process;GO:0009058//biosynthetic process;GO:0097659//nucleic acid…	K09228//KRAB domain-containing zinc finger protein
330938	0	0.18	4.16993	2.06852e-10	5.049e-11	Dixdc1	GO:0030111//regulation of Wnt signaling pathway;GO:0045665//negative regulation of neuron differentiation;GO:0007275//multicellular organism development;GO:0045596//negative regulation of cell differentiation;GO:0048699//generation of neurons;GO:0021987//cerebral cortex development;GO:0050767//regulation of neurogenesis;GO:0009966//regulation of signal transduction;GO:0050896//response to stimulu…	K19483//neuron navigator 2 [EC:3.6.4.12]
433070	0	0.18	4.16993	0.000116108	4.80248e-05	Vmn2r96		K04613//vomeronasal 2 receptor
54326	0	0.18	4.16993	1.60843e-07	4.9242e-08	Elovl2	GO:0044249//cellular biosynthetic process;GO:0044237//cellular metabolic process;GO:0019367//fatty acid elongation, saturated fatty acid;GO:0044281//small molecule metabolic process;GO:0034626//fatty acid elongation, polyunsaturated fatty acid;GO:0006636//unsaturated fatty acid biosynthetic process;GO:0019368//fatty acid elongation, unsaturated fatty acid;GO:0046467//membrane lipid biosynthetic p…	K10205//elongation of very long chain fatty acids protein 2 [EC:2.3.1.199]+ko01040//Biosynthesis of unsaturated fatty acids+ko00062//Fatty acid elongation+ko01212//Fatty acid metabolism
64099	0	0.18	4.16993	3.55032e-05	1.374e-05	Parvg	GO:0030029//actin filament-based process;GO:0009987//cellular process;GO:0007010//cytoskeleton organization;GO:0030036//actin cytoskeleton organization;GO:0006996//organelle organization;GO:0016043//cellular component organization;GO:0022610//biological adhesion;GO:0007155//cell adhesion;GO:0031532//actin cytoskeleton reorganization;GO:0071840//cellular component organization or biogenesis;GO:001…	K06275//parvin+ko04510//Focal adhesion
70809	0.03	0.54	4.16993	6.09088e-09	1.66803e-09	Clec2g	GO:0051241//negative regulation of multicellular organismal process;GO:0045595//regulation of cell differentiation;GO:0050793//regulation of developmental process;GO:0002762//negative regulation of myeloid leukocyte differentiation;GO:0051093//negative regulation of developmental process;GO:0065007//biological regulation;GO:1902106//negative regulation of leukocyte differentiation;GO:0048523//neg…	K10072//C-type lectin domain family 2 member D;K10072//C-type lectin domain family 2 member D
BGI_novel_G000686	0.04	0.69	4.10852	3.77942e-14	7.20604e-15	BGI_novel_G000686	GO:0016021//integral component of membrane;GO:0044425//membrane part;GO:0031224//intrinsic component of membrane;GO:0016020//membrane;
11495	0	0.17	4.08746	6.41689e-05	2.56878e-05	Adam2	GO:0007610//behavior;GO:0009416//response to light stimulus;GO:0050890//cognition;GO:0007632//visual behavior;GO:0022414//reproductive process;GO:0019953//sexual reproduction;GO:0007338//single fertilization;GO:0007611//learning or memory;GO:0044703//multi-organism reproductive process;GO:0003008//system process;GO:0051704//multi-organism process;GO:0009314//response to radiation;GO:0007155//cell…	K06833//disintegrin and metalloproteinase domain-containing protein 2 [EC:3.4.24.-]
15186	0	0.17	4.08746	0.000115984	4.80248e-05	Hdc	GO:0052805//imidazole-containing compound catabolic process;GO:0006548//histidine catabolic process;GO:0006520//cellular amino acid metabolic process;GO:1901360//organic cyclic compound metabolic process;GO:0009712//catechol-containing compound metabolic process;GO:1901617//organic hydroxy compound biosynthetic process;GO:0001694//histamine biosynthetic process;GO:0042401//cellular biogenic amine…	K01590//histidine decarboxylase [EC:4.1.1.22]+ko00340//Histidine metabolism+ko01100//Metabolic pathways
16682	0	0.17	4.08746	0.000378523	0.000167858	Krt4	GO:0009790//embryo development;GO:0065007//biological regulation;GO:0009888//tissue development;GO:0042127//regulation of cell proliferation;GO:0048523//negative regulation of cellular process;GO:0050794//regulation of cellular process;GO:0009987//cellular process;GO:0030855//epithelial cell differentiation;GO:0032502//developmental process;GO:0048869//cellular developmental process;GO:0050680//n…	K07605//type II keratin, basic
242202	0	0.17	4.08746	1.6006e-12	3.38292e-13	Pde5a	GO:0006753//nucleoside phosphate metabolic process;GO:0051249//regulation of lymphocyte activation;GO:1905879//regulation of oogenesis;GO:0006163//purine nucleotide metabolic process;GO:0009987//cellular process;GO:0009117//nucleotide metabolic process;GO:0050865//regulation of cell activation;GO:0044238//primary metabolic process;GO:0014742//positive regulation of muscle hypertrophy;GO:0046483//…	K13762//cGMP-specific 3',5'-cyclic phosphodiesterase [EC:3.1.4.35]+ko04022//cGMP-PKG signaling pathway+ko00230//Purine metabolism
633285	0	0.17	4.08746	0.000116019	4.80248e-05	Rbm46	GO:0051253//negative regulation of RNA metabolic process;GO:0048523//negative regulation of cellular process;GO:0048869//cellular developmental process;GO:0031324//negative regulation of cellular metabolic process;GO:0010608//posttranscriptional regulation of gene expression;GO:0010468//regulation of gene expression;GO:0060255//regulation of macromolecule metabolic process;GO:0031323//regulation …	K11972//E3 ubiquitin-protein ligase RNF19A [EC:2.3.2.31];K01876//aspartyl-tRNA synthetase [EC:6.1.1.12]+ko00970//Aminoacyl-tRNA biosynthesis;K13161//heterogeneous nuclear ribonucleoprotein R;K11972//E3 ubiquitin-protein ligase RNF19A [EC:2.3.2.31];K01876//aspartyl-tRNA synthetase [EC:6.1.1.12]+ko00970//Aminoacyl-tRNA biosynthesis;K13161//heterogeneous nuclear ribonucleoprotein R;K11972//E3 ubiqui…
78249	0	0.17	4.08746	1.9597e-05	7.34932e-06	Adgrf4	GO:0065007//biological regulation;GO:0007154//cell communication;GO:0051716//cellular response to stimulus;GO:0007165//signal transduction;GO:0050896//response to stimulus;GO:0050789//regulation of biological process;GO:0009987//cellular process;GO:0007166//cell surface receptor signaling pathway;GO:0023052//signaling;GO:0050794//regulation of cellular process;GO:0031224//intrinsic component of m…	K08457//G protein-coupled receptor 115
208092	0.02	0.33	4.04439	0.000178986	7.5715e-05	Chmp6	GO:0071705//nitrogen compound transport;GO:0019222//regulation of metabolic process;GO:0051246//regulation of protein metabolic process;GO:0031399//regulation of protein modification process;GO:0045184//establishment of protein localization;GO:0019058//viral life cycle;GO:0048583//regulation of response to stimulus;GO:0009966//regulation of signal transduction;GO:0001932//regulation of protein ph…	K12195//charged multivesicular body protein 6+ko04144//Endocytosis+ko04217//Necroptosis
170571	0	0.16	4	3.55148e-05	1.374e-05	Cntnap4	GO:0065007//biological regulation;GO:0022610//biological adhesion;GO:0050804//modulation of chemical synaptic transmission;GO:0010646//regulation of cell communication;GO:0050794//regulation of cellular process;GO:0032225//regulation of synaptic transmission, dopaminergic;GO:0050795//regulation of behavior;GO:0007155//cell adhesion;GO:0032228//regulation of synaptic transmission, GABAergic;GO:200…	K07380//contactin associated protein-like 2+ko04514//Cell adhesion molecules (CAMs);K07380//contactin associated protein-like 2+ko04514//Cell adhesion molecules (CAMs)
212943	0	0.16	4	1.2768e-09	3.2993e-10	Fam46a	GO:0010468//regulation of gene expression;GO:0050878//regulation of body fluid levels;GO:0050818//regulation of coagulation;GO:0061041//regulation of wound healing;GO:0060255//regulation of macromolecule metabolic process;GO:0030193//regulation of blood coagulation;GO:0048583//regulation of response to stimulus;GO:0080134//regulation of response to stress;GO:0050789//regulation of biological proc…	K05742//solute carrier family 9 (sodium/hydrogen exchanger), member 1+ko04024//cAMP signaling pathway+ko04810//Regulation of actin cytoskeleton+ko04919//Thyroid hormone signaling pathway+ko04261//Adrenergic signaling in cardiomyocytes+ko04260//Cardiac muscle contraction+ko04976//Bile secretion+ko04971//Gastric acid secretion+ko04970//Salivary secretion+ko04972//Pancreatic secretion+ko05205//Prote…
228684	0	0.16	4	0.000682063	0.000313822	Sel1l2	GO:0031224//intrinsic component of membrane;GO:0016021//integral component of membrane;GO:0016020//membrane;GO:0044425//membrane part;	K14026//SEL1 protein+ko04141//Protein processing in endoplasmic reticulum
231821	0	0.16	4	0.000378577	0.000167858	Adap1	GO:0019932//second-messenger-mediated signaling;GO:0007165//signal transduction;GO:0050790//regulation of catalytic activity;GO:0050789//regulation of biological process;GO:0023052//signaling;GO:0035556//intracellular signal transduction;GO:0051336//regulation of hydrolase activity;GO:0051716//cellular response to stimulus;GO:0050794//regulation of cellular process;GO:0065007//biological regulati…	K12491//Arf-GAP with GTPase, ANK repeat and PH domain-containing protein 1/3+ko04144//Endocytosis;K12486//stromal membrane-associated protein+ko04144//Endocytosis
237886	0	0.16	4	3.79081e-10	9.43938e-11	Slfn9	GO:0043229//intracellular organelle;GO:0005623//cell;GO:0044464//cell part;GO:0043226//organelle;GO:0005622//intracellular;GO:0005634//nucleus;GO:0043231//intracellular membrane-bounded organelle;GO:0044424//intracellular part;GO:0043227//membrane-bounded organelle;GO:0005488//binding;GO:0000166//nucleotide binding;GO:0030554//adenyl nucleotide binding;GO:0097367//carbohydrate derivative binding;…	K04613//vomeronasal 2 receptor;K11290//template-activating factor I
269437	0	0.16	4	6.16833e-11	1.44453e-11	Plch1	GO:0006629//lipid metabolic process;GO:0009056//catabolic process;GO:0016042//lipid catabolic process;GO:0007165//signal transduction;GO:0050789//regulation of biological process;GO:0071704//organic substance metabolic process;GO:0009987//cellular process;GO:0007154//cell communication;GO:0035556//intracellular signal transduction;GO:0008152//metabolic process;GO:0051716//cellular response to sti…	K19006//phosphatidylinositol phospholipase C, eta [EC:3.1.4.11]+ko00562//Inositol phosphate metabolism+ko01100//Metabolic pathways
66848	0	0.16	4	1.95838e-05	7.34932e-06	Fuca2	GO:0051707//response to other organism;GO:0051704//multi-organism process;GO:0009607//response to biotic stimulus;GO:0043207//response to external biotic stimulus;GO:0065007//biological regulation;GO:0050896//response to stimulus;GO:0008152//metabolic process;GO:1901135//carbohydrate derivative metabolic process;GO:0009617//response to bacterium;GO:0016137//glycoside metabolic process;GO:0071704/…	K01206//alpha-L-fucosidase [EC:3.2.1.51]+ko00511//Other glycan degradation
67092	0	0.16	4	0.0003789	0.000167858	Gatm	GO:0006601//creatine biosynthetic process;GO:0032502//developmental process;GO:0009987//cellular process;GO:0042246//tissue regeneration;GO:0007275//multicellular organism development;GO:0010033//response to organic substance;GO:0016053//organic acid biosynthetic process;GO:0040007//growth;GO:0009725//response to hormone;GO:1901605//alpha-amino acid metabolic process;GO:1901700//response to oxyge…	K00613//glycine amidinotransferase [EC:2.1.4.1]+ko00330//Arginine and proline metabolism+ko00260//Glycine, serine and threonine metabolism+ko01100//Metabolic pathways
67464	0	0.16	4	3.55206e-05	1.374e-05	Entpd4	GO:0009191//ribonucleoside diphosphate catabolic process;GO:0009164//nucleoside catabolic process;GO:0034641//cellular nitrogen compound metabolic process;GO:0044238//primary metabolic process;GO:0009117//nucleotide metabolic process;GO:0055086//nucleobase-containing small molecule metabolic process;GO:0046133//pyrimidine ribonucleoside catabolic process;GO:0009140//pyrimidine nucleoside diphosph…	K12305//ectonucleoside triphosphate diphosphohydrolase 4 [EC:3.6.1.6]+ko04142//Lysosome+ko00230//Purine metabolism+ko00240//Pyrimidine metabolism
74318	0.03	0.48	4	0.00017896	7.5715e-05	Hopx	GO:0030154//cell differentiation;GO:0051093//negative regulation of developmental process;GO:0036211//protein modification process;GO:0006996//organelle organization;GO:0009059//macromolecule biosynthetic process;GO:0051155//positive regulation of striated muscle cell differentiation;GO:0008016//regulation of heart contraction;GO:0051239//regulation of multicellular organismal process;GO:0048731/…
246313	0.02	0.31	3.9542	1.06763e-11	2.37094e-12	Prokr2	GO:0048511//rhythmic process;GO:0007154//cell communication;GO:0099537//trans-synaptic signaling;GO:0008015//blood circulation;GO:0003008//system process;GO:0023052//signaling;GO:0032501//multicellular organismal process;GO:0099536//synaptic signaling;GO:0050789//regulation of biological process;GO:0009987//cellular process;GO:0007218//neuropeptide signaling pathway;GO:0007268//chemical synaptic …	K08380//prokineticin receptor 2
19337	0.03	0.46	3.9386	0.000103198	4.23272e-05	Rab33a	GO:2000785//regulation of autophagosome assembly;GO:0031323//regulation of cellular metabolic process;GO:0009894//regulation of catabolic process;GO:0010506//regulation of autophagy;GO:0019222//regulation of metabolic process;GO:0016241//regulation of macroautophagy;GO:0051128//regulation of cellular component organization;GO:0019882//antigen processing and presentation;GO:0065007//biological reg…	K07919//Ras-related protein Rab-33A
102642386	0.1	1.53	3.93546	1.9439e-18	2.98788e-19	LOC102642386	GO:0019219//regulation of nucleobase-containing compound metabolic process;GO:0019222//regulation of metabolic process;GO:0010468//regulation of gene expression;GO:0010556//regulation of macromolecule biosynthetic process;GO:0050794//regulation of cellular process;GO:1903506//regulation of nucleic acid-templated transcription;GO:0031326//regulation of cellular biosynthetic process;GO:0051171//reg…	K09228//KRAB domain-containing zinc finger protein
15394	0	0.15	3.90689	0.000681502	0.000313822	Hoxa1	GO:0060872//semicircular canal development;GO:0021599//abducens nerve formation;GO:0021560//abducens nerve development;GO:0032502//developmental process;GO:0010628//positive regulation of gene expression;GO:0031326//regulation of cellular biosynthetic process;GO:0009628//response to abiotic stimulus;GO:0048568//embryonic organ development;GO:0048598//embryonic morphogenesis;GO:0009893//positive r…	K09301//homeobox protein HoxA/B/D1
16173	0.08	1.2	3.90689	6.08948e-09	1.66803e-09	Il18	GO:0042346//positive regulation of NF-kappaB import into nucleus;GO:0048661//positive regulation of smooth muscle cell proliferation;GO:0001775//cell activation;GO:0097190//apoptotic signaling pathway;GO:0051239//regulation of multicellular organismal process;GO:0051174//regulation of phosphorus metabolic process;GO:0022409//positive regulation of cell-cell adhesion;GO:0055088//lipid homeostasis;…	K05482//interleukin 18+ko05134//Legionellosis+ko05132//Salmonella infection+ko05144//Malaria+ko05143//African trypanosomiasis+ko04621//NOD-like receptor signaling pathway+ko04623//Cytosolic DNA-sensing pathway+ko05323//Rheumatoid arthritis+ko05321//Inflammatory bowel disease (IBD)+ko05152//Tuberculosis+ko04060//Cytokine-cytokine receptor interaction+ko05164//Influenza A;K05482//interleukin 18+ko0…
20532	0	0.15	3.90689	0.000682718	0.000313822	Slc3a1	GO:0006865//amino acid transport;GO:0051234//establishment of localization;GO:0046942//carboxylic acid transport;GO:0008152//metabolic process;GO:0044238//primary metabolic process;GO:0005975//carbohydrate metabolic process;GO:0006820//anion transport;GO:0071705//nitrogen compound transport;GO:0051179//localization;GO:0006810//transport;GO:0071702//organic substance transport;GO:0071704//organic …	K14210//solute carrier family 3 (neutral and basic amino acid transporter), member 1+ko04974//Protein digestion and absorption
231045	0	0.15	3.90689	0.000210801	8.9785e-05	4931409K22Rik	GO:0097159//organic cyclic compound binding;GO:0005488//binding;GO:1901265//nucleoside phosphate binding;GO:0097367//carbohydrate derivative binding;GO:0032553//ribonucleotide binding;GO:0030554//adenyl nucleotide binding;GO:0035639//purine ribonucleoside triphosphate binding;GO:0036094//small molecule binding;GO:1901363//heterocyclic compound binding;GO:0032555//purine ribonucleotide binding;GO:…	K00665//fatty acid synthase, animal type [EC:2.3.1.85]+ko04910//Insulin signaling pathway+ko00061//Fatty acid biosynthesis+ko04152//AMPK signaling pathway+ko01100//Metabolic pathways+ko01212//Fatty acid metabolism;K18626//trichohyalin
232371	0	0.15	3.90689	6.41386e-05	2.56878e-05	C1rl	GO:0043170//macromolecule metabolic process;GO:0050896//response to stimulus;GO:0002376//immune system process;GO:0006807//nitrogen compound metabolic process;GO:0019724//B cell mediated immunity;GO:0016064//immunoglobulin mediated immune response;GO:0006952//defense response;GO:0006955//immune response;GO:0048583//regulation of response to stimulus;GO:0044238//primary metabolic process;GO:005078…	K01330//complement component 1, r subcomponent [EC:3.4.21.41]+ko04145//Phagosome+ko05133//Pertussis+ko05322//Systemic lupus erythematosus+ko04610//Complement and coagulation cascades+ko05150//Staphylococcus aureus infection
68235	0	0.15	3.90689	7.80428e-09	2.15596e-09	Mturn	GO:0022008//neurogenesis;GO:0009987//cellular process;GO:0032501//multicellular organismal process;GO:0032502//developmental process;GO:0048731//system development;GO:0048666//neuron development;GO:0048856//anatomical structure development;GO:0048468//cell development;GO:0007275//multicellular organism development;GO:0048869//cellular developmental process;GO:0030182//neuron differentiation;GO:00…	K08051//pleckstrin homology domain containing family A member 8
94280	0	0.15	3.90689	0.000210614	8.9785e-05	Sfxn3	GO:0055072//iron ion homeostasis;GO:0065007//biological regulation;GO:0055065//metal ion homeostasis;GO:0055080//cation homeostasis;GO:0042592//homeostatic process;GO:0055076//transition metal ion homeostasis;GO:0048878//chemical homeostasis;GO:0065008//regulation of biological quality;GO:0050801//ion homeostasis;GO:0098771//inorganic ion homeostasis;GO:0016020//membrane;GO:0031967//organelle env…	K03351//anaphase-promoting complex subunit 4+ko04914//Progesterone-mediated oocyte maturation+ko04120//Ubiquitin mediated proteolysis+ko04114//Oocyte meiosis+ko04110//Cell cycle+ko05166//HTLV-I infection;K12822//RNA-binding protein 25+ko03040//Spliceosome;K03351//anaphase-promoting complex subunit 4+ko04914//Progesterone-mediated oocyte maturation+ko04120//Ubiquitin mediated proteolysis+ko04114//…
231841	0.03	0.43	3.8413	6.10915e-12	1.33241e-12	Brat1	GO:0019222//regulation of metabolic process;GO:0040007//growth;GO:0008219//cell death;GO:0006950//response to stress;GO:0048522//positive regulation of cellular process;GO:0010604//positive regulation of macromolecule metabolic process;GO:0050896//response to stimulus;GO:0031323//regulation of cellular metabolic process;GO:0044281//small molecule metabolic process;GO:0051247//positive regulation …	K06237//collagen, type IV, alpha+ko05222//Small cell lung cancer+ko04512//ECM-receptor interaction+ko04510//Focal adhesion+ko04933//AGE-RAGE signaling pathway in diabetic complications+ko05146//Amoebiasis+ko04974//Protein digestion and absorption+ko05200//Pathways in cancer+ko04151//PI3K-Akt signaling pathway+ko04926//Relaxin signaling pathway+ko05165//Human papillomavirus infection;K06237//colla…
12364	0	0.14	3.80735	0.000379278	0.000167858	Casp12	GO:0034976//response to endoplasmic reticulum stress;GO:0006508//proteolysis;GO:0006986//response to unfolded protein;GO:0050794//regulation of cellular process;GO:0043170//macromolecule metabolic process;GO:0035967//cellular response to topologically incorrect protein;GO:0070887//cellular response to chemical stimulus;GO:0050789//regulation of biological process;GO:0006915//apoptotic process;GO:…	K04741//caspase 12 [EC:3.4.22.-]+ko05014//Amyotrophic lateral sclerosis (ALS)+ko04141//Protein processing in endoplasmic reticulum+ko04210//Apoptosis+ko04621//NOD-like receptor signaling pathway+ko05020//Prion diseases+ko05010//Alzheimer's disease+ko05161//Hepatitis B
14370	0	0.14	3.80735	3.55322e-05	1.374e-05	Fzd8	GO:0010558//negative regulation of macromolecule biosynthetic process;GO:0007154//cell communication;GO:0051173//positive regulation of nitrogen compound metabolic process;GO:0032268//regulation of cellular protein metabolic process;GO:0048518//positive regulation of biological process;GO:0031323//regulation of cellular metabolic process;GO:0006355//regulation of transcription, DNA-templated;GO:0…	K02375//frizzled 5/8+ko04390//Hippo signaling pathway+ko05226//Gastric cancer+ko05225//Hepatocellular carcinoma+ko04916//Melanogenesis+ko04550//Signaling pathways regulating pluripotency of stem cells+ko04310//Wnt signaling pathway+ko05217//Basal cell carcinoma+ko05200//Pathways in cancer+ko05205//Proteoglycans in cancer+ko05224//Breast cancer+ko04934//Cushing's syndrome+ko04150//mTOR signaling p…
18933	0	0.14	3.80735	1.60876e-07	4.9242e-08	Prrx1	GO:0048706//embryonic skeletal system development;GO:0001568//blood vessel development;GO:0048568//embryonic organ development;GO:0048844//artery morphogenesis;GO:0060284//regulation of cell development;GO:0009893//positive regulation of metabolic process;GO:0035108//limb morphogenesis;GO:0009967//positive regulation of signal transduction;GO:2000113//negative regulation of cellular macromolecule…	K09329//paired mesoderm homeobox protein
66863	0	0.14	3.80735	6.41285e-05	2.56878e-05	Lztr1	GO:0005737//cytoplasm;GO:0043231//intracellular membrane-bounded organelle;GO:0005622//intracellular;GO:0012505//endomembrane system;GO:0043229//intracellular organelle;GO:0044444//cytoplasmic part;GO:0005623//cell;GO:0043226//organelle;GO:0044424//intracellular part;GO:0043227//membrane-bounded organelle;GO:0044464//cell part;GO:0005794//Golgi apparatus;	K22747//apoptosis-inducing factor 3;K20285//Rab9 effector protein with kelch motifs
66889	0	0.14	3.80735	0.000379116	0.000167858	Rnf128	GO:0009889//regulation of biosynthetic process;GO:0051239//regulation of multicellular organismal process;GO:0080090//regulation of primary metabolic process;GO:0032446//protein modification by small protein conjugation;GO:0031327//negative regulation of cellular biosynthetic process;GO:0010556//regulation of macromolecule biosynthetic process;GO:0006464//cellular protein modification process;GO:…	K10629//E3 ubiquitin-protein ligase RNF128 [EC:2.3.2.27]
79201	0	0.14	3.80735	3.5509e-05	1.374e-05	Tnfrsf23	GO:0048731//system development;GO:2001237//negative regulation of extrinsic apoptotic signaling pathway;GO:0048666//neuron development;GO:0000902//cell morphogenesis;GO:0030182//neuron differentiation;GO:0009607//response to biotic stimulus;GO:0010646//regulation of cell communication;GO:0065007//biological regulation;GO:0050767//regulation of neurogenesis;GO:0048583//regulation of response to st…	K05159//tumor necrosis factor receptor superfamily member 23;K05158//tumor necrosis factor receptor superfamily member 22;K04722//tumor necrosis factor receptor superfamily member 10A/B+ko04217//Necroptosis+ko04210//Apoptosis+ko04650//Natural killer cell mediated cytotoxicity+ko04060//Cytokine-cytokine receptor interaction+ko05162//Measles+ko05164//Influenza A
654795	0.04	0.55	3.78136	2.31681e-05	8.77626e-06	Sdr39u1	GO:0043226//organelle;GO:0044464//cell part;GO:0005623//cell;GO:0043229//intracellular organelle;GO:0044424//intracellular part;GO:0005622//intracellular;GO:0005634//nucleus;GO:0043231//intracellular membrane-bounded organelle;GO:0043227//membrane-bounded organelle;GO:0048037//cofactor binding;GO:0005488//binding;GO:0050662//coenzyme binding;GO:0016491//oxidoreductase activity;GO:0003824//catalyt…	K07071//uncharacterized protein;K07071//uncharacterized protein;K07071//uncharacterized protein
BGI_novel_G000473	0.33	4.44	3.75002	1.50957e-50	8.28336e-52	BGI_novel_G000473
83555	0.03	0.4	3.73697	9.10859e-07	2.96898e-07	Tex13
20112	0	0.13	3.70044	8.78791e-08	2.63388e-08	Rps6ka2	GO:0042981//regulation of apoptotic process;GO:0008217//regulation of blood pressure;GO:0007165//signal transduction;GO:0071322//cellular response to carbohydrate stimulus;GO:0051784//negative regulation of nuclear division;GO:0007281//germ cell development;GO:0035556//intracellular signal transduction;GO:0051783//regulation of nuclear division;GO:0018209//peptidyl-serine modification;GO:0009743/…	K04373//ribosomal protein S6 kinase alpha-1/2/3/6 [EC:2.7.11.1]+ko04914//Progesterone-mediated oocyte maturation+ko04720//Long-term potentiation+ko04722//Neurotrophin signaling pathway+ko04714//Thermogenesis+ko04931//Insulin resistance+ko04150//mTOR signaling pathway+ko04010//MAPK signaling pathway+ko04114//Oocyte meiosis
21372	0	0.13	3.70044	1.60942e-07	4.9242e-08	Tbl1x		K04508//transducin (beta)-like 1+ko04310//Wnt signaling pathway+ko04013//MAPK signaling pathway - fly
330890	0	0.13	3.70044	0.000379224	0.000167858	Piwil4	GO:0010529//negative regulation of transposition;GO:0071704//organic substance metabolic process;GO:0016070//RNA metabolic process;GO:0031326//regulation of cellular biosynthetic process;GO:0048523//negative regulation of cellular process;GO:0032504//multicellular organism reproduction;GO:0044728//DNA methylation or demethylation;GO:0044237//cellular metabolic process;GO:0007275//multicellular or…	K02156//aubergine+ko04320//Dorso-ventral axis formation
381489	0.01	0.13	3.70044	6.35175e-06	2.25346e-06	Rxfp1	GO:0030324//lung development;GO:0035556//intracellular signal transduction;GO:0071840//cellular component organization or biogenesis;GO:0050794//regulation of cellular process;GO:0000003//reproduction;GO:0050789//regulation of biological process;GO:0051704//multi-organism process;GO:0007189//adenylate cyclase-activating G-protein coupled receptor signaling pathway;GO:0007154//cell communication;G…	K04306//relaxin family peptide receptor 1+ko04080//Neuroactive ligand-receptor interaction+ko04926//Relaxin signaling pathway;K04306//relaxin family peptide receptor 1+ko04080//Neuroactive ligand-receptor interaction+ko04926//Relaxin signaling pathway
637515	0	0.13	3.70044	3.25221e-06	1.12468e-06	Nlrp1b	GO:0043280//positive regulation of cysteine-type endopeptidase activity involved in apoptotic process;GO:2000116//regulation of cysteine-type endopeptidase activity;GO:0032612//interleukin-1 production;GO:0048518//positive regulation of biological process;GO:0016043//cellular component organization;GO:0043170//macromolecule metabolic process;GO:0031323//regulation of cellular metabolic process;GO…	K12798//NACHT, LRR and PYD domains-containing protein 1+ko04621//NOD-like receptor signaling pathway
69983	0.06	0.78	3.70044	6.66778e-34	5.69842e-35	Sis	GO:0044238//primary metabolic process;GO:0005975//carbohydrate metabolic process;GO:0008152//metabolic process;GO:0071704//organic substance metabolic process;GO:0005615//extracellular space;GO:0043227//membrane-bounded organelle;GO:0044464//cell part;GO:1903561//extracellular vesicle;GO:0044425//membrane part;GO:0005623//cell;GO:0016021//integral component of membrane;GO:0031224//intrinsic compo…	K01203//sucrase-isomaltase [EC:3.2.1.48 3.2.1.10]+ko00052//Galactose metabolism+ko00500//Starch and sucrose metabolism+ko04973//Carbohydrate digestion and absorption+ko01100//Metabolic pathways
77532	0	0.13	3.70044	0.00021077	8.9785e-05	Jrkl	GO:0005634//nucleus;GO:0043226//organelle;GO:0044424//intracellular part;GO:0005622//intracellular;GO:0043227//membrane-bounded organelle;GO:0043229//intracellular organelle;GO:0005623//cell;GO:0043231//intracellular membrane-bounded organelle;GO:0044464//cell part;GO:0005488//binding;GO:0003676//nucleic acid binding;GO:1901363//heterocyclic compound binding;GO:0097159//organic cyclic compound bi…	K09229//KRAB and SCAN domains-containing zinc finger protein;K09228//KRAB domain-containing zinc finger protein;K19326//nesprin-1;K05164//interleukin 17 receptor A+ko04657//IL-17 signaling pathway+ko04060//Cytokine-cytokine receptor interaction
80898	0	0.13	3.70044	1.08169e-05	3.93106e-06	Erap1	GO:0045765//regulation of angiogenesis;GO:0050794//regulation of cellular process;GO:0006508//proteolysis;GO:0009987//cellular process;GO:0033619//membrane protein proteolysis;GO:0050789//regulation of biological process;GO:0006518//peptide metabolic process;GO:0048518//positive regulation of biological process;GO:0044237//cellular metabolic process;GO:0007267//cell-cell signaling;GO:1904018//pos…	K09604//adipocyte-derived leucine aminopeptidase [EC:3.4.11.-]
93761	0	0.13	3.70044	5.94149e-06	2.10266e-06	Smarca1	GO:0010556//regulation of macromolecule biosynthetic process;GO:0045935//positive regulation of nucleobase-containing compound metabolic process;GO:0030182//neuron differentiation;GO:0044238//primary metabolic process;GO:0019219//regulation of nucleobase-containing compound metabolic process;GO:0043044//ATP-dependent chromatin remodeling;GO:0008152//metabolic process;GO:0051173//positive regulati…	K11727//SWI/SNF-related matrix-associated actin-dependent regulator of chromatin subfamily A member 1 [EC:3.6.4.-]
671003	0.16	1.94	3.59991	4.09357e-08	1.19644e-08	Gm9513	GO:0010469//regulation of receptor activity;GO:0023051//regulation of signaling;GO:0050789//regulation of biological process;GO:0050794//regulation of cellular process;GO:0048583//regulation of response to stimulus;GO:0010646//regulation of cell communication;GO:0009966//regulation of signal transduction;GO:0065007//biological regulation;GO:0065009//regulation of molecular function;GO:0099601//re…
102631805	0	0.12	3.58496	8.78976e-08	2.63388e-08	LOC102631805		K08798//MAP/microtubule affinity-regulating kinase [EC:2.7.11.1];K08798//MAP/microtubule affinity-regulating kinase [EC:2.7.11.1];K08798//MAP/microtubule affinity-regulating kinase [EC:2.7.11.1];K08798//MAP/microtubule affinity-regulating kinase [EC:2.7.11.1];K08798//MAP/microtubule affinity-regulating kinase [EC:2.7.11.1];K08798//MAP/microtubule affinity-regulating kinase [EC:2.7.11.1];K08798//M…
16420	0	0.12	3.58496	5.94678e-06	2.10266e-06	Itgb6	GO:0007155//cell adhesion;GO:0009306//protein secretion;GO:0051234//establishment of localization;GO:0007165//signal transduction;GO:0006810//transport;GO:0007154//cell communication;GO:0033627//cell adhesion mediated by integrin;GO:0071702//organic substance transport;GO:0050789//regulation of biological process;GO:0042886//amide transport;GO:0015031//protein transport;GO:0007160//cell-matrix ad…	K06589//integrin beta 6+ko05414//Dilated cardiomyopathy (DCM)+ko05410//Hypertrophic cardiomyopathy (HCM)+ko05412//Arrhythmogenic right ventricular cardiomyopathy (ARVC)+ko04810//Regulation of actin cytoskeleton+ko04512//ECM-receptor interaction+ko04510//Focal adhesion+ko04151//PI3K-Akt signaling pathway+ko05165//Human papillomavirus infection
16517	0	0.12	3.58496	6.41993e-05	2.56878e-05	Kcnj16	GO:0010107//potassium ion import;GO:0006812//cation transport;GO:0030001//metal ion transport;GO:0051234//establishment of localization;GO:0006813//potassium ion transport;GO:0098660//inorganic ion transmembrane transport;GO:0071804//cellular potassium ion transport;GO:0006810//transport;GO:0051179//localization;GO:0015672//monovalent inorganic cation transport;GO:0034220//ion transmembrane trans…	K05009//potassium inwardly-rectifying channel subfamily J member 16+ko04971//Gastric acid secretion
215693	0	0.12	3.58496	0.000116054	4.80248e-05	Zmat1	GO:0046914//transition metal ion binding;GO:0043167//ion binding;GO:0005488//binding;GO:0046872//metal ion binding;GO:0008270//zinc ion binding;GO:0003676//nucleic acid binding;GO:0097159//organic cyclic compound binding;GO:1901363//heterocyclic compound binding;GO:0043169//cation binding;	K21436//ankyrin repeat domain-containing protein 11/12;K22610//lysine-specific demethylase 9 [EC:1.14.11.-]
319695	0	0.12	3.58496	1.08131e-05	3.93106e-06	Ankar	GO:0005634//nucleus;GO:0005623//cell;GO:0043227//membrane-bounded organelle;GO:0043231//intracellular membrane-bounded organelle;GO:0044425//membrane part;GO:0031224//intrinsic component of membrane;GO:0044464//cell part;GO:0016020//membrane;GO:0016021//integral component of membrane;GO:0043229//intracellular organelle;GO:0005622//intracellular;GO:0005737//cytoplasm;GO:0044424//intracellular part…	K15503//serine/threonine-protein phosphatase 6 regulatory ankyrin repeat subunit B;K21440//ankyrin repeat domain-containing protein 50;K08803//death-associated protein kinase [EC:2.7.11.1]+ko04140//Autophagy - animal+ko05219//Bladder cancer+ko05200//Pathways in cancer
67760	0.01	0.12	3.58496	0.000189364	8.03082e-05	Slc38a2	GO:0006812//cation transport;GO:0051234//establishment of localization;GO:0015696//ammonium transport;GO:0015695//organic cation transport;GO:0048856//anatomical structure development;GO:0048513//animal organ development;GO:0007565//female pregnancy;GO:0050896//response to stimulus;GO:0015804//neutral amino acid transport;GO:0051179//localization;GO:0031667//response to nutrient levels;GO:0071496…	K14207//solute carrier family 38 (sodium-coupled neutral amino acid transporter), member 2+ko04724//Glutamatergic synapse+ko04727//GABAergic synapse+ko04974//Protein digestion and absorption
71720	0.02	0.24	3.58496	1.72174e-10	4.1754e-11	Osbpl3	GO:0010876//lipid localization;GO:0006810//transport;GO:0033036//macromolecule localization;GO:0006869//lipid transport;GO:0051234//establishment of localization;GO:0071702//organic substance transport;GO:0051179//localization;GO:0005635//nuclear envelope;GO:0031965//nuclear membrane;GO:0005737//cytoplasm;GO:0098827//endoplasmic reticulum subcompartment;GO:0120038//plasma membrane bounded cell pr…	K20463//oxysterol-binding protein-related protein 3/6/7;K20463//oxysterol-binding protein-related protein 3/6/7;K20463//oxysterol-binding protein-related protein 3/6/7;K20463//oxysterol-binding protein-related protein 3/6/7;K20463//oxysterol-binding protein-related protein 3/6/7;K20463//oxysterol-binding protein-related protein 3/6/7;K20463//oxysterol-binding protein-related protein 3/6/7
72077	0	0.12	3.58496	1.95575e-05	7.34932e-06	Gcnt3	GO:0048513//animal organ development;GO:0034645//cellular macromolecule biosynthetic process;GO:0016064//immunoglobulin mediated immune response;GO:0043413//macromolecule glycosylation;GO:0044238//primary metabolic process;GO:0002460//adaptive immune response based on somatic recombination of immune receptors built from immunoglobulin superfamily domains;GO:0001822//kidney development;GO:0006464/…	K09662//N-acetylglucosaminyltransferase 3, mucin type [EC:2.4.1.-]+ko00512//Mucin type O-glycan biosynthesis+ko01100//Metabolic pathways;K09662//N-acetylglucosaminyltransferase 3, mucin type [EC:2.4.1.-]+ko00512//Mucin type O-glycan biosynthesis+ko01100//Metabolic pathways;K09662//N-acetylglucosaminyltransferase 3, mucin type [EC:2.4.1.-]+ko00512//Mucin type O-glycan biosynthesis+ko01100//Metabol…
66985	0.04	0.47	3.55459	1.36095e-05	5.01548e-06	Rassf7	GO:0009987//cellular process;GO:0032886//regulation of microtubule-based process;GO:0006915//apoptotic process;GO:0050896//response to stimulus;GO:0051128//regulation of cellular component organization;GO:0051493//regulation of cytoskeleton organization;GO:0070507//regulation of microtubule cytoskeleton organization;GO:0065007//biological regulation;GO:0007154//cell communication;GO:0008219//cell…	K09855//Ras association domain-containing protein 7/8
18508	0.07	0.82	3.5502	3.54928e-21	4.8152e-22	Pax6		K08031//paired box protein 6+ko04950//Maturity onset diabetes of the young+ko04550//Signaling pathways regulating pluripotency of stem cells
216616	0.14	1.59	3.50553	3.25491e-19	4.82232e-20	Efemp1	GO:0006468//protein phosphorylation;GO:0009886//post-embryonic animal morphogenesis;GO:0048050//post-embryonic eye morphogenesis;GO:0006796//phosphate-containing compound metabolic process;GO:0050793//regulation of developmental process;GO:0032331//negative regulation of chondrocyte differentiation;GO:0007154//cell communication;GO:0051239//regulation of multicellular organismal process;GO:005079…	K18262//EGF-containing fibulin-like extracellular matrix protein 1;K18262//EGF-containing fibulin-like extracellular matrix protein 1;K18262//EGF-containing fibulin-like extracellular matrix protein 1
100042165	0	0.11	3.45943	3.25518e-06	1.12468e-06	BC005561	GO:0006886//intracellular protein transport;GO:0051641//cellular localization;GO:0006405//RNA export from nucleus;GO:0051168//nuclear export;GO:0008104//protein localization;GO:0006810//transport;GO:0015031//protein transport;GO:0015833//peptide transport;GO:0070727//cellular macromolecule localization;GO:0008152//metabolic process;GO:0050658//RNA transport;GO:0006406//mRNA export from nucleus;GO…	K12879//THO complex subunit 2+ko03040//Spliceosome+ko03013//RNA transport
12554	0	0.11	3.45943	0.000210708	8.9785e-05	Cdh13	GO:0050921//positive regulation of chemotaxis;GO:0050927//positive regulation of positive chemotaxis;GO:0030030//cell projection organization;GO:2000147//positive regulation of cell motility;GO:0045785//positive regulation of cell adhesion;GO:0023052//signaling;GO:0000278//mitotic cell cycle;GO:0010628//positive regulation of gene expression;GO:2000112//regulation of cellular macromolecule biosyn…	K06808//cadherin 13, H-cadherin
18627	0	0.11	3.45943	3.25458e-06	1.12468e-06	Per2	GO:0051588//regulation of neurotransmitter transport;GO:1903507//negative regulation of nucleic acid-templated transcription;GO:0033692//cellular polysaccharide biosynthetic process;GO:0070344//regulation of fat cell proliferation;GO:0051100//negative regulation of binding;GO:1903320//regulation of protein modification by small protein conjugation or removal;GO:1903530//regulation of secretion by…	K02633//period circadian protein 2+ko04711//Circadian rhythm - fly+ko04710//Circadian rhythm+ko04713//Circadian entrainment+ko05202//Transcriptional misregulation in cancer+ko05221//Acute myeloid leukemia+ko05168//Herpes simplex infection
211468	0	0.11	3.45943	1.95739e-05	7.34932e-06	Kcnh8	GO:0065007//biological regulation;GO:0065008//regulation of biological quality;GO:0042391//regulation of membrane potential;GO:0005622//intracellular;GO:0005887//integral component of plasma membrane;GO:0031226//intrinsic component of plasma membrane;GO:0016021//integral component of membrane;GO:0044464//cell part;GO:0044459//plasma membrane part;GO:0005886//plasma membrane;GO:0016020//membrane;G…	K04911//potassium voltage-gated channel Eag-related subfamily H member 8
212124	0	0.11	3.45943	6.97584e-10	1.76475e-10	Cfap46	GO:0009987//cellular process;GO:0040011//locomotion;GO:0051179//localization;GO:0003341//cilium movement;GO:0007017//microtubule-based process;GO:0001539//cilium or flagellum-dependent cell motility;GO:0007018//microtubule-based movement;GO:0048870//cell motility;GO:0051674//localization of cell;GO:0006928//movement of cell or subcellular component;GO:0060294//cilium movement involved in cell mot…	K05853//Ca2+ transporting ATPase, sarcoplasmic/endoplasmic reticulum [EC:3.6.3.8]+ko04022//cGMP-PKG signaling pathway+ko04020//Calcium signaling pathway+ko04972//Pancreatic secretion+ko05010//Alzheimer's disease;K05853//Ca2+ transporting ATPase, sarcoplasmic/endoplasmic reticulum [EC:3.6.3.8]+ko04022//cGMP-PKG signaling pathway+ko04020//Calcium signaling pathway+ko04972//Pancreatic secretion+ko05…
215008	0	0.11	3.45943	1.40537e-13	2.76908e-14	Vezt	GO:0048856//anatomical structure development;GO:0007275//multicellular organism development;GO:0009792//embryo development ending in birth or egg hatching;GO:0043009//chordate embryonic development;GO:0098609//cell-cell adhesion;GO:0007155//cell adhesion;GO:0032502//developmental process;GO:0032501//multicellular organismal process;GO:0022610//biological adhesion;GO:0009790//embryo development;GO…
236643	0.02	0.22	3.45943	1.81195e-11	4.08902e-12	Sytl5	GO:0071840//cellular component organization or biogenesis;GO:0048284//organelle fusion;GO:0006887//exocytosis;GO:0071702//organic substance transport;GO:0006996//organelle organization;GO:0099537//trans-synaptic signaling;GO:0016192//vesicle-mediated transport;GO:0009987//cellular process;GO:0034613//cellular protein localization;GO:0065008//regulation of biological quality;GO:0097480//establishm…	K17598//synaptotagmin-like protein;K17598//synaptotagmin-like protein
77411	0	0.11	3.45943	0.000682624	0.000313822	Esrp2	GO:0060425//lung morphogenesis;GO:0044237//cellular metabolic process;GO:0071704//organic substance metabolic process;GO:0000375//RNA splicing, via transesterification reactions;GO:0061138//morphogenesis of a branching epithelium;GO:0019222//regulation of metabolic process;GO:0006725//cellular aromatic compound metabolic process;GO:0032501//multicellular organismal process;GO:0009888//tissue deve…	K14947//epithelial splicing regulatory protein 1/2;K14947//epithelial splicing regulatory protein 1/2;K14947//epithelial splicing regulatory protein 1/2
68666	0.07	0.76	3.44057	5.2093e-16	9.03208e-17	Svop	GO:0031410//cytoplasmic vesicle;GO:0099503//secretory vesicle;GO:0044422//organelle part;GO:0044425//membrane part;GO:0043227//membrane-bounded organelle;GO:0016020//membrane;GO:0043229//intracellular organelle;GO:0005737//cytoplasm;GO:0030659//cytoplasmic vesicle membrane;GO:0098805//whole membrane;GO:0044433//cytoplasmic vesicle part;GO:0097708//intracellular vesicle;GO:0012505//endomembrane sy…	K06258//MFS transporter, VNT family, synaptic vesicle glycoprotein 2+ko04512//ECM-receptor interaction;K08202//MFS transporter, OCT family, solute carrier family 22 (organic cation transporter), member 4/5+ko05231//Choline metabolism in cancer;K08200//MFS transporter, OCT family, solute carrier family 22 (organic cation transporter), member 3+ko05231//Choline metabolism in cancer;K08198//MFS tran…
100041420	0.02	0.21	3.39232	6.54507e-08	1.93896e-08	Gm3325	GO:0019222//regulation of metabolic process;GO:0051252//regulation of RNA metabolic process;GO:0051171//regulation of nitrogen compound metabolic process;GO:0010556//regulation of macromolecule biosynthetic process;GO:0031323//regulation of cellular metabolic process;GO:0019219//regulation of nucleobase-containing compound metabolic process;GO:0065007//biological regulation;GO:2000112//regulation…	K09228//KRAB domain-containing zinc finger protein
74127	0.02	0.21	3.39232	1.11499e-05	4.06332e-06	Krt80	GO:0099512//supramolecular fiber;GO:0099080//supramolecular complex;GO:0045095//keratin filament;GO:0043232//intracellular non-membrane-bounded organelle;GO:0005882//intermediate filament;GO:0099513//polymeric cytoskeletal fiber;GO:0045111//intermediate filament cytoskeleton;GO:0005856//cytoskeleton;GO:0005623//cell;GO:0043228//non-membrane-bounded organelle;GO:0044446//intracellular organelle pa…	K07605//type II keratin, basic
104859	0.02	0.2	3.32193	4.89195e-11	1.13575e-11	Tecpr2		K20191//Hermansky-Pudlak syndrome 5 protein;K20191//Hermansky-Pudlak syndrome 5 protein;K01858//myo-inositol-1-phosphate synthase [EC:5.5.1.4]+ko00562//Inositol phosphate metabolism+ko01100//Metabolic pathways;K01858//myo-inositol-1-phosphate synthase [EC:5.5.1.4]+ko00562//Inositol phosphate metabolism+ko01100//Metabolic pathways;K17988//tectonin beta-propeller repeat-containing protein 1;K20191/…
12953	0	0.1	3.32193	0.00021049	8.9785e-05	Cry2	GO:0019219//regulation of nucleobase-containing compound metabolic process;GO:0009416//response to light stimulus;GO:0051234//establishment of localization;GO:0048511//rhythmic process;GO:0031400//negative regulation of protein modification process;GO:0009059//macromolecule biosynthetic process;GO:0032879//regulation of localization;GO:1902679//negative regulation of RNA biosynthetic process;GO:0…	K02295//cryptochrome+ko04710//Circadian rhythm
17064	0	0.1	3.32193	1.60909e-07	4.9242e-08	Cd93	GO:0098609//cell-cell adhesion;GO:0022610//biological adhesion;GO:0007155//cell adhesion;GO:0005886//plasma membrane;GO:0009986//cell surface;GO:0044424//intracellular part;GO:0044444//cytoplasmic part;GO:0031410//cytoplasmic vesicle;GO:0043227//membrane-bounded organelle;GO:0044421//extracellular region part;GO:0016020//membrane;GO:0043229//intracellular organelle;GO:0005576//extracellular regio…	K06702//CDW93 antigen
208158	0	0.1	3.32193	0.00068225	0.000313822	Map6d1	GO:0051494//negative regulation of cytoskeleton organization;GO:0031365//N-terminal protein amino acid modification;GO:1901576//organic substance biosynthetic process;GO:0000226//microtubule cytoskeleton organization;GO:0043543//protein acylation;GO:0048519//negative regulation of biological process;GO:0044237//cellular metabolic process;GO:0050794//regulation of cellular process;GO:0048667//cell…	K09650//rhomboid-like protein [EC:3.4.21.105];K10432//microtubule-associated protein 6
208188	0	0.1	3.32193	3.2534e-06	1.12468e-06	Ghsr	GO:0048232//male gamete generation;GO:0090278//negative regulation of peptide hormone secretion;GO:0040012//regulation of locomotion;GO:0009914//hormone transport;GO:0031960//response to corticosteroid;GO:0042127//regulation of cell proliferation;GO:0009410//response to xenobiotic stimulus;GO:0060259//regulation of feeding behavior;GO:0050794//regulation of cellular process;GO:0032940//secretion …	K04284//growth hormone secretagogue receptor+ko04024//cAMP signaling pathway+ko04080//Neuroactive ligand-receptor interaction
21824	0	0.1	3.32193	0.000378792	0.000167858	Thbd	GO:0050878//regulation of body fluid levels;GO:0044703//multi-organism reproductive process;GO:0042060//wound healing;GO:0022414//reproductive process;GO:0033993//response to lipid;GO:0002237//response to molecule of bacterial origin;GO:0009314//response to radiation;GO:0065008//regulation of biological quality;GO:0007565//female pregnancy;GO:0032101//regulation of response to external stimulus;G…	K03907//thrombomodulin+ko04933//AGE-RAGE signaling pathway in diabetic complications+ko05418//Fluid shear stress and atherosclerosis+ko04610//Complement and coagulation cascades
244416	0	0.1	3.32193	6.40982e-05	2.56878e-05	Ppp1r3b	GO:0005979//regulation of glycogen biosynthetic process;GO:0044238//primary metabolic process;GO:0043467//regulation of generation of precursor metabolites and energy;GO:0031329//regulation of cellular catabolic process;GO:0044237//cellular metabolic process;GO:0031326//regulation of cellular biosynthetic process;GO:0043471//regulation of cellular carbohydrate catabolic process;GO:0009987//cellul…	K07189//protein phosphatase 1 regulatory subunit 3A/B/C/D/E+ko04910//Insulin signaling pathway+ko04931//Insulin resistance
58178	0	0.1	3.32193	0.000378469	0.000167858	Sorcs1	GO:0031224//intrinsic component of membrane;GO:0016020//membrane;GO:0016021//integral component of membrane;GO:0044425//membrane part;	K12388//sortilin+ko04142//Lysosome+ko04722//Neurotrophin signaling pathway+ko04979//Cholesterol metabolism;K12388//sortilin+ko04142//Lysosome+ko04722//Neurotrophin signaling pathway+ko04979//Cholesterol metabolism;K12388//sortilin+ko04142//Lysosome+ko04722//Neurotrophin signaling pathway+ko04979//Cholesterol metabolism;K12388//sortilin+ko04142//Lysosome+ko04722//Neurotrophin signaling pathway+ko0…
76267	0	0.1	3.32193	0.000681596	0.000313822	Fads1	GO:0071704//organic substance metabolic process;GO:0009058//biosynthetic process;GO:0033993//response to lipid;GO:0009744//response to sucrose;GO:0032502//developmental process;GO:0009725//response to hormone;GO:0044238//primary metabolic process;GO:0033559//unsaturated fatty acid metabolic process;GO:0044237//cellular metabolic process;GO:0071496//cellular response to external stimulus;GO:001003…	K10224//acyl-CoA (8-3)-desaturase (Delta-5 desaturase) [EC:1.14.19.44]+ko01040//Biosynthesis of unsaturated fatty acids+ko01212//Fatty acid metabolism
18400	0.04	0.39	3.2854	0.000527187	0.000238772	Slc22a18	GO:0050896//response to stimulus;GO:0006811//ion transport;GO:0042493//response to drug;GO:0051179//localization;GO:0006820//anion transport;GO:0006810//transport;GO:0051234//establishment of localization;GO:0015893//drug transport;GO:0042221//response to chemical;GO:0071944//cell periphery;GO:0005887//integral component of plasma membrane;GO:0044422//organelle part;GO:0044424//intracellular part…	K08214//MFS transporter, OCT family, solute carrier family 22 (organic cation transporter), member 18
13081	0.03	0.29	3.27302	3.51766e-07	1.10733e-07	Cyp24a1	GO:0033273//response to vitamin;GO:0055114//oxidation-reduction process;GO:0001649//osteoblast differentiation;GO:0001503//ossification;GO:0033280//response to vitamin D;GO:0006775//fat-soluble vitamin metabolic process;GO:0008202//steroid metabolic process;GO:0010033//response to organic substance;GO:0007584//response to nutrient;GO:0006766//vitamin metabolic process;GO:0009991//response to extr…	K07436//vitamin D3 24-hydroxylase [EC:1.14.15.16]+ko00100//Steroid biosynthesis+ko05206//MicroRNAs in cancer+ko01100//Metabolic pathways+ko04928//Parathyroid hormone synthesis, secretion and action
215456	0.05	0.47	3.23266	9.06988e-09	2.52332e-09	Gpat2	GO:1901360//organic cyclic compound metabolic process;GO:1901135//carbohydrate derivative metabolic process;GO:0006796//phosphate-containing compound metabolic process;GO:0019432//triglyceride biosynthetic process;GO:0006639//acylglycerol metabolic process;GO:0008152//metabolic process;GO:0006650//glycerophospholipid metabolic process;GO:0046474//glycerophospholipid biosynthetic process;GO:004424…	K00629//glycerol-3-phosphate O-acyltransferase 1/2 [EC:2.3.1.15]+ko00564//Glycerophospholipid metabolism+ko00561//Glycerolipid metabolism+ko01100//Metabolic pathways
100126777	0.13	1.22	3.2303	0.000189336	8.03082e-05	Esp4	GO:0005615//extracellular space;GO:0044421//extracellular region part;GO:0005576//extracellular region;GO:0005102//receptor binding;GO:0005186//pheromone activity;GO:0005488//binding;GO:0005515//protein binding;
71592	0.04	0.37	3.20945	1.00499e-13	1.96244e-14	Pogk	GO:0019219//regulation of nucleobase-containing compound metabolic process;GO:0048856//anatomical structure development;GO:0009889//regulation of biosynthetic process;GO:0051252//regulation of RNA metabolic process;GO:0032502//developmental process;GO:2001141//regulation of RNA biosynthetic process;GO:0032501//multicellular organismal process;GO:0031326//regulation of cellular biosynthetic proces…	K20478//golgin subfamily B member 1
BGI_novel_G000271	0.09	0.82	3.18763	2.0537e-21	2.7564e-22	BGI_novel_G000271	GO:0051234//establishment of localization;GO:0071702//organic substance transport;GO:0051179//localization;GO:0015031//protein transport;GO:0009987//cellular process;GO:0042886//amide transport;GO:0098657//import into cell;GO:0006915//apoptotic process;GO:0071705//nitrogen compound transport;GO:0008104//protein localization;GO:0006897//endocytosis;GO:0045184//establishment of protein localization…	K12480//Rab GTPase-binding effector protein 1+ko04144//Endocytosis
12043	0	0.09	3.16993	5.38341e-07	1.72113e-07	Bcl2	GO:0060548//negative regulation of cell death;GO:0031103//axon regeneration;GO:0048731//system development;GO:0048869//cellular developmental process;GO:0030030//cell projection organization;GO:0097435//supramolecular fiber organization;GO:0000904//cell morphogenesis involved in differentiation;GO:0032501//multicellular organismal process;GO:0031099//regeneration;GO:0002376//immune system process…	K02161//apoptosis regulator Bcl-2+ko05014//Amyotrophic lateral sclerosis (ALS)+ko04140//Autophagy - animal+ko04141//Protein processing in endoplasmic reticulum+ko04630//Jak-STAT signaling pathway+ko05222//Small cell lung cancer+ko05226//Gastric cancer+ko04510//Focal adhesion+ko04933//AGE-RAGE signaling pathway in diabetic complications+ko04215//Apoptosis - multiple species+ko04217//Necroptosis+ko…
17952	0	0.09	3.16993	1.79118e-06	6.01578e-07	Naip6	GO:0045861//negative regulation of proteolysis;GO:0050790//regulation of catalytic activity;GO:0031323//regulation of cellular metabolic process;GO:0008219//cell death;GO:0006952//defense response;GO:0048584//positive regulation of response to stimulus;GO:0050794//regulation of cellular process;GO:0060548//negative regulation of cell death;GO:0051336//regulation of hydrolase activity;GO:0065009//…	K12807//baculoviral IAP repeat-containing protein 1+ko05134//Legionellosis+ko04621//NOD-like receptor signaling pathway
19041	0	0.09	3.16993	3.25399e-06	1.12468e-06	Ppl	GO:0030154//cell differentiation;GO:0048731//system development;GO:0009888//tissue development;GO:0009913//epidermal cell differentiation;GO:0032501//multicellular organismal process;GO:0031424//keratinization;GO:0008544//epidermis development;GO:0060429//epithelium development;GO:0048856//anatomical structure development;GO:0009612//response to mechanical stimulus;GO:0007275//multicellular organ…	K10386//periplakin
20739	0	0.09	3.16993	1.4268e-08	4.03068e-09	Spta1	GO:0034641//cellular nitrogen compound metabolic process;GO:0050867//positive regulation of cell activation;GO:0044271//cellular nitrogen compound biosynthetic process;GO:0065008//regulation of biological quality;GO:0007009//plasma membrane organization;GO:0030837//negative regulation of actin filament polymerization;GO:0070663//regulation of leukocyte proliferation;GO:0002684//positive regulatio…	K06114//spectrin alpha+ko04210//Apoptosis
230837	0	0.09	3.16993	1.95608e-05	7.34932e-06	Asap3	GO:0050790//regulation of catalytic activity;GO:0016477//cell migration;GO:0050789//regulation of biological process;GO:0110020//regulation of actomyosin structure organization;GO:0032970//regulation of actin filament-based process;GO:0051674//localization of cell;GO:0044093//positive regulation of molecular function;GO:0044087//regulation of cellular component biogenesis;GO:0040011//locomotion;G…	K12488//Arf-GAP with SH3 domain, ANK repeat and PH domain-containing protein+ko04144//Endocytosis+ko04666//Fc gamma R-mediated phagocytosis
52028	0.01	0.09	3.16993	0.000179013	7.5715e-05	Bbs1	GO:0050794//regulation of cellular process;GO:0008104//protein localization;GO:0048870//cell motility;GO:0051270//regulation of cellular component movement;GO:0030030//cell projection organization;GO:0015031//protein transport;GO:0065007//biological regulation;GO:0003008//system process;GO:0030154//cell differentiation;GO:0042886//amide transport;GO:0006810//transport;GO:0051674//localization of …	K16746//Bardet-Biedl syndrome 1 protein
54324	0	0.09	3.16993	3.54916e-05	1.374e-05	Arhgef5	GO:0051338//regulation of transferase activity;GO:0031334//positive regulation of protein complex assembly;GO:0019222//regulation of metabolic process;GO:0032879//regulation of localization;GO:0040011//locomotion;GO:0019219//regulation of nucleobase-containing compound metabolic process;GO:0043087//regulation of GTPase activity;GO:0050794//regulation of cellular process;GO:0032270//positive regul…	K20684//Rho guanine nucleotide exchange factor 5
246133	0.05	0.44	3.1375	3.80415e-05	1.47727e-05	Kcne2	GO:0034220//ion transmembrane transport;GO:1904064//positive regulation of cation transmembrane transport;GO:1901021//positive regulation of calcium ion transmembrane transporter activity;GO:0010107//potassium ion import;GO:0032409//regulation of transporter activity;GO:0060048//cardiac muscle contraction;GO:0060307//regulation of ventricular cardiac muscle cell membrane repolarization;GO:1903817…	K04896//potassium voltage-gated channel Isk-related subfamily E member 2+ko04971//Gastric acid secretion
434179	0.27	2.3	3.0906	2.22343e-45	1.38833e-46	Gm5595	GO:0050789//regulation of biological process;GO:0031323//regulation of cellular metabolic process;GO:0065007//biological regulation;GO:0009408//response to heat;GO:2000112//regulation of cellular macromolecule biosynthetic process;GO:0019219//regulation of nucleobase-containing compound metabolic process;GO:0050896//response to stimulus;GO:0010556//regulation of macromolecule biosynthetic process…	K09228//KRAB domain-containing zinc finger protein
213084	0.06	0.51	3.08746	1.21081e-07	3.67022e-08	Cdkl3	GO:0051130//positive regulation of cellular component organization;GO:0036211//protein modification process;GO:0048731//system development;GO:0032502//developmental process;GO:0050767//regulation of neurogenesis;GO:0045665//negative regulation of neuron differentiation;GO:0050793//regulation of developmental process;GO:0048523//negative regulation of cellular process;GO:0051241//negative regulati…	K08824//cyclin-dependent kinase-like [EC:2.7.11.22];K08824//cyclin-dependent kinase-like [EC:2.7.11.22];K08824//cyclin-dependent kinase-like [EC:2.7.11.22];K08824//cyclin-dependent kinase-like [EC:2.7.11.22];K08824//cyclin-dependent kinase-like [EC:2.7.11.22];K08824//cyclin-dependent kinase-like [EC:2.7.11.22];K08824//cyclin-dependent kinase-like [EC:2.7.11.22];K08824//cyclin-dependent kinase-lik…
20302	0.33	2.79	3.07973	4.81547e-13	9.83746e-14	Ccl3	GO:1902106//negative regulation of leukocyte differentiation;GO:0070296//sarcoplasmic reticulum calcium ion transport;GO:0002688//regulation of leukocyte chemotaxis;GO:0048519//negative regulation of biological process;GO:0002443//leukocyte mediated immunity;GO:0052312//modulation of transcription in other organism involved in symbiotic interaction;GO:0043087//regulation of GTPase activity;GO:003…	K05408//C-C motif chemokine 3+ko05132//Salmonella infection+ko05142//Chagas disease (American trypanosomiasis)+ko04620//Toll-like receptor signaling pathway+ko05323//Rheumatoid arthritis+ko04062//Chemokine signaling pathway+ko04060//Cytokine-cytokine receptor interaction+ko05163//Human cytomegalovirus infection
546282	0.18	1.52	3.078	3.30441e-09	8.818e-10	Gm5935	GO:0007049//cell cycle;GO:0022414//reproductive process;GO:0009987//cellular process;GO:0000003//reproduction;GO:0051321//meiotic cell cycle;GO:0099086//synaptonemal structure;GO:0044427//chromosomal part;GO:0043227//membrane-bounded organelle;GO:0031981//nuclear lumen;GO:0000228//nuclear chromosome;GO:0043231//intracellular membrane-bounded organelle;GO:0005623//cell;GO:0044464//cell part;GO:004…	K19528//synaptonemal complex protein 3+ko03440//Homologous recombination;K19528//synaptonemal complex protein 3+ko03440//Homologous recombination
192289	0.08	0.67	3.06609	3.7234e-12	8.02686e-13	Tmlhe	GO:0044237//cellular metabolic process;GO:0048519//negative regulation of biological process;GO:0006578//amino-acid betaine biosynthetic process;GO:0097164//ammonium ion metabolic process;GO:0009058//biosynthetic process;GO:0034641//cellular nitrogen compound metabolic process;GO:0044092//negative regulation of molecular function;GO:0071704//organic substance metabolic process;GO:0009892//negativ…	K00474//trimethyllysine dioxygenase [EC:1.14.11.8]+ko00310//Lysine degradation;K00474//trimethyllysine dioxygenase [EC:1.14.11.8]+ko00310//Lysine degradation
16423	0.13	1.07	3.04103	1.92944e-16	3.26988e-17	Cd47	GO:0043207//response to external biotic stimulus;GO:0051234//establishment of localization;GO:0002696//positive regulation of leukocyte activation;GO:0051130//positive regulation of cellular component organization;GO:0008284//positive regulation of cell proliferation;GO:0048518//positive regulation of biological process;GO:0051249//regulation of lymphocyte activation;GO:0022407//regulation of cel…	K06266//CD47 antigen (Rh-related antigen, integrin-associated signal transducer)+ko04512//ECM-receptor interaction;K06266//CD47 antigen (Rh-related antigen, integrin-associated signal transducer)+ko04512//ECM-receptor interaction
108934	0.05	0.4	3	2.90576e-11	6.64724e-12	Smim13	GO:0016020//membrane;GO:0031224//intrinsic component of membrane;GO:0016021//integral component of membrane;GO:0044425//membrane part;	K14959//histone-lysine N-methyltransferase MLL4 [EC:2.1.1.43]+ko00310//Lysine degradation
14765	0.06	0.48	3	1.15293e-09	2.97268e-10	Gpr50	GO:0044464//cell part;GO:0031974//membrane-enclosed lumen;GO:0071944//cell periphery;GO:0005634//nucleus;GO:0016020//membrane;GO:0016021//integral component of membrane;GO:0070013//intracellular organelle lumen;GO:0043229//intracellular organelle;GO:0031981//nuclear lumen;GO:0043227//membrane-bounded organelle;GO:0044422//organelle part;GO:0043226//organelle;GO:0044424//intracellular part;GO:0043…	K04287//G protein-coupled receptor 50+ko04080//Neuroactive ligand-receptor interaction;K04287//G protein-coupled receptor 50+ko04080//Neuroactive ligand-receptor interaction
16408	0	0.08	3	6.41891e-05	2.56878e-05	Itgal	GO:0007166//cell surface receptor signaling pathway;GO:0002252//immune effector process;GO:0051668//localization within membrane;GO:0072657//protein localization to membrane;GO:0007160//cell-matrix adhesion;GO:0034613//cellular protein localization;GO:0007229//integrin-mediated signaling pathway;GO:0001775//cell activation;GO:0070727//cellular macromolecule localization;GO:0050789//regulation of …	K05718//integrin alpha L+ko05416//Viral myocarditis+ko04810//Regulation of actin cytoskeleton+ko04514//Cell adhesion molecules (CAMs)+ko04650//Natural killer cell mediated cytotoxicity+ko05144//Malaria+ko05323//Rheumatoid arthritis+ko04670//Leukocyte transendothelial migration+ko04015//Rap1 signaling pathway+ko05150//Staphylococcus aureus infection+ko05166//HTLV-I infection+ko05169//Epstein-Barr …
18128	0.01	0.08	3	8.23238e-06	2.9513e-06	Notch1	GO:0009987//cellular process;GO:0012501//programmed cell death;GO:0035107//appendage morphogenesis;GO:0048731//system development;GO:0035108//limb morphogenesis;GO:1902263//apoptotic process involved in embryonic digit morphogenesis;GO:0009790//embryo development;GO:0003179//heart valve morphogenesis;GO:1902742//apoptotic process involved in development;GO:0048856//anatomical structure developmen…	K02599//Notch 1+ko04320//Dorso-ventral axis formation+ko01522//Endocrine resistance+ko04919//Thyroid hormone signaling pathway+ko04658//Th1 and Th2 cell differentiation+ko05020//Prion diseases+ko05200//Pathways in cancer+ko05206//MicroRNAs in cancer+ko05224//Breast cancer+ko04330//Notch signaling pathway+ko05165//Human papillomavirus infection
18675	0	0.08	3	1.95805e-05	7.34932e-06	Phex	GO:1902074//response to salt;GO:0009719//response to endogenous stimulus;GO:0044238//primary metabolic process;GO:0071396//cellular response to lipid;GO:1901564//organonitrogen compound metabolic process;GO:0019538//protein metabolic process;GO:1990418//response to insulin-like growth factor stimulus;GO:0010243//response to organonitrogen compound;GO:0033280//response to vitamin D;GO:0019637//org…	K08636//phosphate-regulating neutral endopeptidase [EC:3.4.24.-]
19737	0	0.08	3	0.000682812	0.000313822	Rgs5	GO:0048583//regulation of response to stimulus;GO:0010648//negative regulation of cell communication;GO:0050789//regulation of biological process;GO:0009987//cellular process;GO:0010646//regulation of cell communication;GO:0023051//regulation of signaling;GO:0009968//negative regulation of signal transduction;GO:0045744//negative regulation of G-protein coupled receptor protein signaling pathway;…	K16449//regulator of G-protein signaling
20845	0.04	0.32	3	4.00071e-08	1.16829e-08	Star	GO:0060284//regulation of cell development;GO:0045471//response to ethanol;GO:0071310//cellular response to organic substance;GO:0010604//positive regulation of macromolecule metabolic process;GO:0035094//response to nicotine;GO:0008203//cholesterol metabolic process;GO:0008202//steroid metabolic process;GO:0043066//negative regulation of apoptotic process;GO:0042747//circadian sleep/wake cycle, …	K16931//steroidogenic acute regulatory protein, mitochondrial+ko04913//Ovarian steroidogenesis+ko04979//Cholesterol metabolism+ko04934//Cushing's syndrome+ko04927//Cortisol synthesis and secretion+ko04925//Aldosterone synthesis and secretion
208890	0	0.08	3	3.55264e-05	1.374e-05	Slc26a7	GO:0015849//organic acid transport;GO:0003008//system process;GO:0001696//gastric acid secretion;GO:0072348//sulfur compound transport;GO:0007586//digestion;GO:0042592//homeostatic process;GO:0030641//regulation of cellular pH;GO:0030003//cellular cation homeostasis;GO:0055082//cellular chemical homeostasis;GO:0065008//regulation of biological quality;GO:0006873//cellular ion homeostasis;GO:00325…	K13962//solute carrier family 26 (anion exchange transporter), member 7+ko04971//Gastric acid secretion
70435	0	0.08	3	0.000378415	0.000167858	Inf2	GO:0032535//regulation of cellular component size;GO:0016043//cellular component organization;GO:0030029//actin filament-based process;GO:0022603//regulation of anatomical structure morphogenesis;GO:0050794//regulation of cellular process;GO:0033043//regulation of organelle organization;GO:0009987//cellular process;GO:0050789//regulation of biological process;GO:0065008//regulation of biological …	K05741//diaphanous 2+ko04810//Regulation of actin cytoskeleton;K05740//diaphanous 1+ko05131//Shigellosis+ko04810//Regulation of actin cytoskeleton+ko04510//Focal adhesion+ko04933//AGE-RAGE signaling pathway in diabetic complications
80892	0	0.08	3	1.60013e-12	3.38292e-13	Zfhx4	GO:1903506//regulation of nucleic acid-templated transcription;GO:0009889//regulation of biosynthetic process;GO:0051252//regulation of RNA metabolic process;GO:0031323//regulation of cellular metabolic process;GO:2000112//regulation of cellular macromolecule biosynthetic process;GO:0051171//regulation of nitrogen compound metabolic process;GO:0050789//regulation of biological process;GO:0031326/…	K09380//zinc finger homeobox protein 4;K09380//zinc finger homeobox protein 4
78251	0.05	0.39	2.96347	1.08045e-09	2.77558e-10	Zfp712	GO:0080090//regulation of primary metabolic process;GO:2001141//regulation of RNA biosynthetic process;GO:0050794//regulation of cellular process;GO:0065007//biological regulation;GO:0010556//regulation of macromolecule biosynthetic process;GO:0019219//regulation of nucleobase-containing compound metabolic process;GO:0031326//regulation of cellular biosynthetic process;GO:2000112//regulation of c…	K09228//KRAB domain-containing zinc finger protein
83492	0.05	0.39	2.96347	4.58228e-06	1.60344e-06	Gsdmc	GO:0008219//cell death;GO:0009987//cellular process;GO:0012501//programmed cell death;GO:0044424//intracellular part;GO:0005829//cytosol;GO:0005815//microtubule organizing center;GO:0015630//microtubule cytoskeleton;GO:0005622//intracellular;GO:0005856//cytoskeleton;GO:0043231//intracellular membrane-bounded organelle;GO:0016020//membrane;GO:0043229//intracellular organelle;GO:0044444//cytoplasmi…	K22143//gasdermin-C
100039280	0.03	0.23	2.9386	0.000914761	0.000427754	Cphx3	GO:0043227//membrane-bounded organelle;GO:0005634//nucleus;GO:0005623//cell;GO:0044464//cell part;GO:0043231//intracellular membrane-bounded organelle;GO:0044424//intracellular part;GO:0043226//organelle;GO:0005622//intracellular;GO:0043229//intracellular organelle;GO:0003676//nucleic acid binding;GO:0003677//DNA binding;GO:1901363//heterocyclic compound binding;GO:0097159//organic cyclic compoun…	K09381//paired box protein 3/7;K09337//cone-rod homeobox protein
101772	0.03	0.23	2.9386	7.57844e-06	2.70778e-06	Ano1	GO:0060438//trachea development;GO:0007275//multicellular organism development;GO:0048584//positive regulation of response to stimulus;GO:0065008//regulation of biological quality;GO:0051234//establishment of localization;GO:0009408//response to heat;GO:0032501//multicellular organismal process;GO:0051179//localization;GO:0032880//regulation of protein localization;GO:1902476//chloride transmembr…	K19496//anoctamin-1;K19496//anoctamin-1;K19496//anoctamin-1;K19496//anoctamin-1;K19496//anoctamin-1;K19496//anoctamin-1;K19496//anoctamin-1;K19496//anoctamin-1;K19496//anoctamin-1;K19496//anoctamin-1
108672	0.02	0.15	2.90689	2.90266e-06	9.96296e-07	Zdhhc15	GO:0006996//organelle organization;GO:0044238//primary metabolic process;GO:0009987//cellular process;GO:0009058//biosynthetic process;GO:0044267//cellular protein metabolic process;GO:0051179//localization;GO:0043170//macromolecule metabolic process;GO:0042157//lipoprotein metabolic process;GO:0044249//cellular biosynthetic process;GO:1901564//organonitrogen compound metabolic process;GO:0021700…	K20028//palmitoyltransferase ZDHHC2/15/20 [EC:2.3.1.225]
14283	0.04	0.3	2.90689	0.00087746	0.000409592	Fosl1	GO:0072358//cardiovascular system development;GO:0006950//response to stress;GO:0090304//nucleic acid metabolic process;GO:0061458//reproductive system development;GO:0007611//learning or memory;GO:0032570//response to progesterone;GO:1903508//positive regulation of nucleic acid-templated transcription;GO:0034641//cellular nitrogen compound metabolic process;GO:0097659//nucleic acid-templated tra…	K04502//fos-like antigen 1+ko04657//IL-17 signaling pathway+ko04380//Osteoclast differentiation+ko04310//Wnt signaling pathway+ko05166//HTLV-I infection
327655	0.02	0.15	2.90689	6.29178e-05	2.51314e-05	Ppip5k1	GO:0043647//inositol phosphate metabolic process;GO:0009058//biosynthetic process;GO:0044281//small molecule metabolic process;GO:0005975//carbohydrate metabolic process;GO:0046173//polyol biosynthetic process;GO:0044237//cellular metabolic process;GO:0032958//inositol phosphate biosynthetic process;GO:0006796//phosphate-containing compound metabolic process;GO:0008152//metabolic process;GO:19016…	K13024//inositol-hexakisphosphate/diphosphoinositol-pentakisphosphate 1-kinase [EC:2.7.4.24]+ko04070//Phosphatidylinositol signaling system
BGI_novel_G000701	0.16	1.18	2.88264	5.98771e-07	1.9249e-07	BGI_novel_G000701		K02993//small subunit ribosomal protein S7e+ko03010//Ribosome
16329	0.03	0.22	2.87447	0.000320911	0.000140772	Inpp1	GO:0006793//phosphorus metabolic process;GO:0044255//cellular lipid metabolic process;GO:0006650//glycerophospholipid metabolic process;GO:0046488//phosphatidylinositol metabolic process;GO:0006796//phosphate-containing compound metabolic process;GO:0071704//organic substance metabolic process;GO:0030258//lipid modification;GO:0019637//organophosphate metabolic process;GO:0044237//cellular metabo…	K01107//inositol polyphosphate 1-phosphatase [EC:3.1.3.57]+ko04070//Phosphatidylinositol signaling system+ko00562//Inositol phosphate metabolism+ko01100//Metabolic pathways
BGI_novel_G000746	0.13	0.95	2.86942	1.00315e-06	3.2812e-07	BGI_novel_G000746		K12397//AP-3 complex subunit beta+ko04142//Lysosome;K21125//mucin-5AC+ko04657//IL-17 signaling pathway
14756	0.05	0.36	2.848	1.35546e-05	4.99438e-06	Gpld1	GO:0009896//positive regulation of catabolic process;GO:0006505//GPI anchor metabolic process;GO:0040012//regulation of locomotion;GO:0010632//regulation of epithelial cell migration;GO:0051247//positive regulation of protein metabolic process;GO:0080090//regulation of primary metabolic process;GO:0002682//regulation of immune system process;GO:0002040//sprouting angiogenesis;GO:0042176//regulati…	K01127//glycosylphosphatidylinositol phospholipase D [EC:3.1.4.50]+ko00563//Glycosylphosphatidylinositol (GPI)-anchor biosynthesis+ko01100//Metabolic pathways;K01127//glycosylphosphatidylinositol phospholipase D [EC:3.1.4.50]+ko00563//Glycosylphosphatidylinositol (GPI)-anchor biosynthesis+ko01100//Metabolic pathways;K01127//glycosylphosphatidylinositol phospholipase D [EC:3.1.4.50]+ko00563//Glyco…
100233208	0.11	0.78	2.82597	4.5446e-21	6.19418e-22	Gm10778	GO:0031323//regulation of cellular metabolic process;GO:0019222//regulation of metabolic process;GO:2000112//regulation of cellular macromolecule biosynthetic process;GO:0060255//regulation of macromolecule metabolic process;GO:0019219//regulation of nucleobase-containing compound metabolic process;GO:0051252//regulation of RNA metabolic process;GO:0010468//regulation of gene expression;GO:006500…	K09228//KRAB domain-containing zinc finger protein
14812	0	0.07	2.80735	5.94254e-06	2.10266e-06	Grin2b	GO:0071840//cellular component organization or biogenesis;GO:0060079//excitatory postsynaptic potential;GO:0006874//cellular calcium ion homeostasis;GO:0065008//regulation of biological quality;GO:1902950//regulation of dendritic spine maintenance;GO:0048513//animal organ development;GO:0010646//regulation of cell communication;GO:0042493//response to drug;GO:0007154//cell communication;GO:005096…	K05210//glutamate receptor ionotropic, NMDA 2B+ko05014//Amyotrophic lateral sclerosis (ALS)+ko04024//cAMP signaling pathway+ko04728//Dopaminergic synapse+ko04724//Glutamatergic synapse+ko04720//Long-term potentiation+ko05322//Systemic lupus erythematosus+ko05034//Alcoholism+ko05033//Nicotine addiction+ko05031//Amphetamine addiction+ko05030//Cocaine addiction+ko04713//Circadian entrainment+ko04014…
211986	0.08	0.56	2.80735	5.88324e-10	1.48129e-10	Tmem18	GO:0044249//cellular biosynthetic process;GO:1901360//organic cyclic compound metabolic process;GO:0006725//cellular aromatic compound metabolic process;GO:0019438//aromatic compound biosynthetic process;GO:0009987//cellular process;GO:0051674//localization of cell;GO:0044237//cellular metabolic process;GO:0051179//localization;GO:0009059//macromolecule biosynthetic process;GO:0071704//organic su…	K22145//transmembrane protein 18
213439	0	0.07	2.80735	0.000379332	0.000167858	Gpr174	GO:0042592//homeostatic process;GO:0065008//regulation of biological quality;GO:0065007//biological regulation;GO:0043029//T cell homeostasis;GO:0002260//lymphocyte homeostasis;GO:0048872//homeostasis of number of cells;GO:0002376//immune system process;GO:0001776//leukocyte homeostasis;GO:0071944//cell periphery;GO:0005623//cell;GO:0031224//intrinsic component of membrane;GO:0044425//membrane pa…	K08391//G protein-coupled receptor 174
71785	0.05	0.35	2.80735	3.48807e-09	9.32572e-10	Pdgfd	GO:0014066//regulation of phosphatidylinositol 3-kinase signaling;GO:1902533//positive regulation of intracellular signal transduction;GO:0042325//regulation of phosphorylation;GO:0010647//positive regulation of cell communication;GO:0065007//biological regulation;GO:0043549//regulation of kinase activity;GO:0050817//coagulation;GO:0034599//cellular response to oxidative stress;GO:0002682//regula…	K05450//platelet derived growth factor C/D+ko04810//Regulation of actin cytoskeleton+ko04510//Focal adhesion+ko04072//Phospholipase D signaling pathway+ko01521//EGFR tyrosine kinase inhibitor resistance+ko05215//Prostate cancer+ko05218//Melanoma+ko04540//Gap junction+ko04151//PI3K-Akt signaling pathway+ko04010//MAPK signaling pathway+ko04014//Ras signaling pathway+ko04015//Rap1 signaling pathway+…
100039830	0.15	1.03	2.77961	3.51696e-07	1.10733e-07	Gm2446	GO:1903708//positive regulation of hemopoiesis;GO:0048583//regulation of response to stimulus;GO:0050794//regulation of cellular process;GO:0050776//regulation of immune response;GO:0065009//regulation of molecular function;GO:1903706//regulation of hemopoiesis;GO:0042327//positive regulation of phosphorylation;GO:0051246//regulation of protein metabolic process;GO:0001932//regulation of protein …	K11583//serine/threonine-protein phosphatase 2A regulatory subunit B''+ko04071//Sphingolipid signaling pathway+ko04728//Dopaminergic synapse+ko04261//Adrenergic signaling in cardiomyocytes+ko03015//mRNA surveillance pathway+ko04152//AMPK signaling pathway+ko04151//PI3K-Akt signaling pathway+ko05165//Human papillomavirus infection;K11583//serine/threonine-protein phosphatase 2A regulatory subunit …
66580	0.78	5.34	2.77529	9.90713e-99	2.4307e-100	Esf1	GO:0044249//cellular biosynthetic process;GO:0010468//regulation of gene expression;GO:0006139//nucleobase-containing compound metabolic process;GO:2001141//regulation of RNA biosynthetic process;GO:0071704//organic substance metabolic process;GO:0051171//regulation of nitrogen compound metabolic process;GO:0060255//regulation of macromolecule metabolic process;GO:0044260//cellular macromolecule …	K18626//trichohyalin
77945	0.19	1.29	2.7633	2.30976e-24	2.76064e-25	Rpgrip1	GO:0048869//cellular developmental process;GO:0050896//response to stimulus;GO:0043010//camera-type eye development;GO:0042462//eye photoreceptor cell development;GO:0048856//anatomical structure development;GO:0001754//eye photoreceptor cell differentiation;GO:0048731//system development;GO:0048666//neuron development;GO:0050877//nervous system process;GO:0032501//multicellular organismal proces…	K16512//X-linked retinitis pigmentosa GTPase regulator-interacting protein 1;K16512//X-linked retinitis pigmentosa GTPase regulator-interacting protein 1;K16512//X-linked retinitis pigmentosa GTPase regulator-interacting protein 1;K16512//X-linked retinitis pigmentosa GTPase regulator-interacting protein 1;K16512//X-linked retinitis pigmentosa GTPase regulator-interacting protein 1;K16512//X-link…
386753	0.12	0.81	2.75489	7.77397e-14	1.50625e-14	Dbpht2		K20804//E3 ubiquitin-protein ligase RNF34 [EC:2.3.2.31];K01528//dynamin GTPase [EC:3.6.5.5]+ko04144//Endocytosis+ko04072//Phospholipase D signaling pathway+ko04721//Synaptic vesicle cycle+ko05100//Bacterial invasion of epithelial cells+ko04961//Endocrine and other factor-regulated calcium reabsorption
BGI_novel_G000463	0.24	1.61	2.74595	4.83063e-09	1.31193e-09	BGI_novel_G000463		K11253//histone H3+ko05322//Systemic lupus erythematosus+ko05034//Alcoholism+ko05202//Transcriptional misregulation in cancer
16009	0.03	0.2	2.73697	0.000877579	0.000409592	Igfbp3	GO:0006464//cellular protein modification process;GO:0014910//regulation of smooth muscle cell migration;GO:0051246//regulation of protein metabolic process;GO:0009967//positive regulation of signal transduction;GO:0016310//phosphorylation;GO:0001933//negative regulation of protein phosphorylation;GO:0023051//regulation of signaling;GO:0031324//negative regulation of cellular metabolic process;GO…	K10138//insulin-like growth factor-binding protein 3+ko04218//Cellular senescence+ko05202//Transcriptional misregulation in cancer+ko04115//p53 signaling pathway;K10138//insulin-like growth factor-binding protein 3+ko04218//Cellular senescence+ko05202//Transcriptional misregulation in cancer+ko04115//p53 signaling pathway
20678	0.03	0.2	2.73697	2.45148e-07	7.61342e-08	Sox5	GO:0034645//cellular macromolecule biosynthetic process;GO:0031328//positive regulation of cellular biosynthetic process;GO:0010629//negative regulation of gene expression;GO:1903506//regulation of nucleic acid-templated transcription;GO:0043009//chordate embryonic development;GO:0010033//response to organic substance;GO:0009893//positive regulation of metabolic process;GO:0048522//positive regul…	K09269//transcription factor SOX5/6/13 (SOX group D);K09269//transcription factor SOX5/6/13 (SOX group D);K09269//transcription factor SOX5/6/13 (SOX group D);K09269//transcription factor SOX5/6/13 (SOX group D);K09269//transcription factor SOX5/6/13 (SOX group D);K09269//transcription factor SOX5/6/13 (SOX group D);K09269//transcription factor SOX5/6/13 (SOX group D);K09269//transcription factor…
233271	0.02	0.13	2.70044	6.29079e-05	2.51314e-05	Luzp2	GO:0005576//extracellular region;	K19533//synaptonemal complex protein 1
497097	0.11	0.71	2.69032	2.38903e-12	5.1171e-13	Xkr4	GO:0031224//intrinsic component of membrane;GO:0016021//integral component of membrane;GO:0016020//membrane;GO:0044425//membrane part;	K15144//mediator of RNA polymerase II transcription subunit 1+ko01522//Endocrine resistance+ko04919//Thyroid hormone signaling pathway;K11722//bromodomain-containing protein 4
BGI_novel_G000479	0.26	1.65	2.66588	6.19062e-11	1.45014e-11	BGI_novel_G000479	GO:0051222//positive regulation of protein transport;GO:0010556//regulation of macromolecule biosynthetic process;GO:0032501//multicellular organismal process;GO:0009056//catabolic process;GO:0043436//oxoacid metabolic process;GO:0048519//negative regulation of biological process;GO:0051223//regulation of protein transport;GO:0044237//cellular metabolic process;GO:0009141//nucleoside triphosphate…	K00134//glyceraldehyde 3-phosphate dehydrogenase [EC:1.2.1.12]+ko01200//Carbon metabolism+ko00010//Glycolysis / Gluconeogenesis+ko01230//Biosynthesis of amino acids+ko05010//Alzheimer's disease+ko01100//Metabolic pathways+ko04066//HIF-1 signaling pathway
216767	0.41	2.6	2.66482	2.90427e-06	9.97032e-07	Mrpl22	GO:0071704//organic substance metabolic process;GO:0010467//gene expression;GO:0043170//macromolecule metabolic process;GO:0044271//cellular nitrogen compound biosynthetic process;GO:0044238//primary metabolic process;GO:0043604//amide biosynthetic process;GO:0006807//nitrogen compound metabolic process;GO:0009987//cellular process;GO:0044249//cellular biosynthetic process;GO:1901576//organic sub…	K02890//large subunit ribosomal protein L22+ko03010//Ribosome;K02890//large subunit ribosomal protein L22+ko03010//Ribosome
68603	0.16	1	2.64386	7.77774e-07	2.52292e-07	Pmvk	GO:0006644//phospholipid metabolic process;GO:1901576//organic substance biosynthetic process;GO:0008299//isoprenoid biosynthetic process;GO:0046490//isopentenyl diphosphate metabolic process;GO:0008203//cholesterol metabolic process;GO:0006629//lipid metabolic process;GO:0006695//cholesterol biosynthetic process;GO:1902653//secondary alcohol biosynthetic process;GO:0006790//sulfur compound metab…	K13273//phosphomevalonate kinase [EC:2.7.4.2]+ko04146//Peroxisome+ko00900//Terpenoid backbone biosynthesis+ko01100//Metabolic pathways
98388	0.04	0.25	2.64386	5.40185e-05	2.14166e-05	Chst10	GO:0008152//metabolic process;GO:0007616//long-term memory;GO:0050877//nervous system process;GO:0050890//cognition;GO:0009058//biosynthetic process;GO:0007610//behavior;GO:0005975//carbohydrate metabolic process;GO:1901576//organic substance biosynthetic process;GO:0016051//carbohydrate biosynthetic process;GO:0003008//system process;GO:0071704//organic substance metabolic process;GO:0044238//pr…	K09674//carbohydrate 3-sulfotransferase 10 [EC:2.8.2.-]+ko00515//Mannose type O-glycan biosynthesis+ko01100//Metabolic pathways
268491	0.18	1.12	2.63743	3.01682e-27	3.21566e-28	Meioc	GO:0009987//cellular process;GO:0003006//developmental process involved in reproduction;GO:0045143//homologous chromosome segregation;GO:0048523//negative regulation of cellular process;GO:0043489//RNA stabilization;GO:0060255//regulation of macromolecule metabolic process;GO:0000003//reproduction;GO:0050789//regulation of biological process;GO:0006259//DNA metabolic process;GO:0051728//cell cycl…
360220	0.1	0.62	2.63227	0.000170819	7.20554e-05	Speer4d
BGI_novel_G000600	0.15	0.93	2.63227	1.05639e-05	3.8258e-06	BGI_novel_G000600
102633100	0.16	0.99	2.62936	1.98282e-11	4.49214e-12	Gm31009		K10308//F-box protein 31;K14284//nuclear RNA export factor+ko03013//RNA transport+ko03015//mRNA surveillance pathway+ko03008//Ribosome biogenesis in eukaryotes+ko05164//Influenza A+ko05168//Herpes simplex infection
102634529	0.16	0.99	2.62936	1.98337e-11	4.49214e-12	LOC102634529		K10308//F-box protein 31;K14284//nuclear RNA export factor+ko03013//RNA transport+ko03015//mRNA surveillance pathway+ko03008//Ribosome biogenesis in eukaryotes+ko05164//Influenza A+ko05168//Herpes simplex infection
BGI_novel_G000468	0.38	2.32	2.61005	6.33947e-12	1.38505e-12	BGI_novel_G000468		K09600//cathepsin M [EC:3.4.22.-]+ko04142//Lysosome;K01365//cathepsin L [EC:3.4.22.15]+ko04145//Phagosome+ko04140//Autophagy - animal+ko04142//Lysosome+ko04210//Apoptosis+ko05418//Fluid shear stress and atherosclerosis+ko04612//Antigen processing and presentation+ko05323//Rheumatoid arthritis+ko05205//Proteoglycans in cancer;K09601//cathepsin R [EC:3.4.22.-]
108167986	0.06	0.36	2.58496	2.03366e-05	7.66004e-06	LOC108167986		K09228//KRAB domain-containing zinc finger protein
16572	0	0.06	2.58496	0.000210583	8.9785e-05	Kif5a	GO:0022008//neurogenesis;GO:0048869//cellular developmental process;GO:0061564//axon development;GO:0048667//cell morphogenesis involved in neuron differentiation;GO:0097485//neuron projection guidance;GO:0006935//chemotaxis;GO:0048731//system development;GO:0007409//axonogenesis;GO:0032990//cell part morphogenesis;GO:0009605//response to external stimulus;GO:0033036//macromolecule localization;G…	K10396//kinesin family member 5+ko04144//Endocytosis+ko04728//Dopaminergic synapse
171395	0	0.06	2.58496	5.94043e-06	2.10266e-06	Pkd1l1		K04987//polycystin 1L1
20269	0	0.06	2.58496	3.54974e-05	1.374e-05	Scn3a	GO:0086010//membrane depolarization during action potential;GO:0009987//cellular process;GO:0003008//system process;GO:0019228//neuronal action potential;GO:0051899//membrane depolarization;GO:0050877//nervous system process;GO:0065007//biological regulation;GO:0032501//multicellular organismal process;GO:0035637//multicellular organismal signaling;GO:0023052//signaling;GO:0007154//cell communica…	K04836//voltage-gated sodium channel type III alpha+ko04742//Taste transduction;K04836//voltage-gated sodium channel type III alpha+ko04742//Taste transduction;K04836//voltage-gated sodium channel type III alpha+ko04742//Taste transduction;K04836//voltage-gated sodium channel type III alpha+ko04742//Taste transduction
208292	0	0.06	2.58496	5.38022e-07	1.72113e-07	Zfp871	GO:2000112//regulation of cellular macromolecule biosynthetic process;GO:0010556//regulation of macromolecule biosynthetic process;GO:0050794//regulation of cellular process;GO:0009889//regulation of biosynthetic process;GO:0050789//regulation of biological process;GO:0006355//regulation of transcription, DNA-templated;GO:0019219//regulation of nucleobase-containing compound metabolic process;GO:…	K09228//KRAB domain-containing zinc finger protein
24013	0	0.06	2.58496	0.000116072	4.80248e-05	Grk1	GO:0051716//cellular response to stimulus;GO:0016310//phosphorylation;GO:0008152//metabolic process;GO:0050789//regulation of biological process;GO:0006468//protein phosphorylation;GO:0043412//macromolecule modification;GO:0009987//cellular process;GO:0043170//macromolecule metabolic process;GO:0007165//signal transduction;GO:0006464//cellular protein modification process;GO:0022400//regulation o…	K00909//rhodopsin kinase [EC:2.7.11.14]+ko04144//Endocytosis+ko04062//Chemokine signaling pathway+ko04744//Phototransduction
241944	0.01	0.06	2.58496	0.000914885	0.000427754	D3Ertd254e	GO:0019222//regulation of metabolic process;GO:0050789//regulation of biological process;GO:0080090//regulation of primary metabolic process;GO:0019219//regulation of nucleobase-containing compound metabolic process;GO:0050794//regulation of cellular process;GO:2001141//regulation of RNA biosynthetic process;GO:0031323//regulation of cellular metabolic process;GO:2000112//regulation of cellular m…	K09228//KRAB domain-containing zinc finger protein
320923	0.04	0.24	2.58496	0.000364025	0.000160694	Mtap7d3	GO:0007017//microtubule-based process;GO:0044085//cellular component biogenesis;GO:0043623//cellular protein complex assembly;GO:0043933//macromolecular complex subunit organization;GO:0009987//cellular process;GO:0051258//protein polymerization;GO:0016043//cellular component organization;GO:0034622//cellular macromolecular complex assembly;GO:0022607//cellular component assembly;GO:0070271//prot…	K16807//MAP7 domain-containing protein 3
327954	0.01	0.06	2.58496	0.000231596	9.97082e-05	Dnah2	GO:0007018//microtubule-based movement;GO:0006928//movement of cell or subcellular component;GO:0009987//cellular process;GO:0007017//microtubule-based process;GO:0043229//intracellular organelle;GO:0005856//cytoskeleton;GO:0044430//cytoskeletal part;GO:0030286//dynein complex;GO:0043232//intracellular non-membrane-bounded organelle;GO:0044422//organelle part;GO:0043234//protein complex;GO:190249…	K10408//dynein heavy chain, axonemal+ko05016//Huntington's disease;K10408//dynein heavy chain, axonemal+ko05016//Huntington's disease;K10408//dynein heavy chain, axonemal+ko05016//Huntington's disease;K10408//dynein heavy chain, axonemal+ko05016//Huntington's disease;K10408//dynein heavy chain, axonemal+ko05016//Huntington's disease;K10408//dynein heavy chain, axonemal+ko05016//Huntington's disea…
330998	0	0.06	2.58496	6.41184e-05	2.56878e-05	Ankrd34c		K20350//p24 family protein gamma-4;K21440//ankyrin repeat domain-containing protein 50
332175	0	0.06	2.58496	0.000681782	0.000313822	Zdhhc23	GO:0009987//cellular process;GO:0008152//metabolic process;GO:1901576//organic substance biosynthetic process;GO:0006464//cellular protein modification process;GO:0042157//lipoprotein metabolic process;GO:0043170//macromolecule metabolic process;GO:0034613//cellular protein localization;GO:0070727//cellular macromolecule localization;GO:0008104//protein localization;GO:0043412//macromolecule modi…	K18932//palmitoyltransferase [EC:2.3.1.225]
432572	0	0.06	2.58496	3.25162e-06	1.12468e-06	Specc1		K16808//nuclear mitotic apparatus protein 1;K20282//GRIP and coiled-coil domain-containing protein 2;K20282//GRIP and coiled-coil domain-containing protein 2
60344	0	0.06	2.58496	9.84699e-07	3.21774e-07	Fign	GO:0051171//regulation of nitrogen compound metabolic process;GO:0051301//cell division;GO:0080134//regulation of response to stress;GO:0006282//regulation of DNA repair;GO:0031323//regulation of cellular metabolic process;GO:0051052//regulation of DNA metabolic process;GO:0048583//regulation of response to stimulus;GO:0080135//regulation of cellular response to stress;GO:0080090//regulation of p…	K22766//fidgetin-like protein 1 [EC:3.6.4.-]
630836	0.04	0.24	2.58496	0.000279212	0.000121388	2010315B03Rik	GO:1903506//regulation of nucleic acid-templated transcription;GO:0060255//regulation of macromolecule metabolic process;GO:0019219//regulation of nucleobase-containing compound metabolic process;GO:0051171//regulation of nitrogen compound metabolic process;GO:0050794//regulation of cellular process;GO:0031326//regulation of cellular biosynthetic process;GO:0009889//regulation of biosynthetic pro…	K09228//KRAB domain-containing zinc finger protein
27274	0.41	2.42	2.56131	1.18989e-30	1.12873e-31	Zfp354b	GO:0044271//cellular nitrogen compound biosynthetic process;GO:2001141//regulation of RNA biosynthetic process;GO:0019438//aromatic compound biosynthetic process;GO:0045892//negative regulation of transcription, DNA-templated;GO:0009889//regulation of biosynthetic process;GO:0009059//macromolecule biosynthetic process;GO:0044238//primary metabolic process;GO:0045934//negative regulation of nucleo…	K09228//KRAB domain-containing zinc finger protein
102631717	0.34	1.97	2.53459	4.38475e-05	1.71601e-05	Gm29986	GO:0005886//plasma membrane;GO:0005623//cell;GO:0071944//cell periphery;GO:0044464//cell part;GO:0044425//membrane part;GO:0016020//membrane;GO:0016021//integral component of membrane;GO:0031224//intrinsic component of membrane;GO:0004871//signal transducer activity;GO:0004930//G-protein coupled receptor activity;GO:0038023//signaling receptor activity;GO:0099600//transmembrane receptor activity;…	K04613//vomeronasal 2 receptor
BGI_novel_G000587	0.13	0.75	2.52838	0.000170845	7.20554e-05	BGI_novel_G000587	GO:0044424//intracellular part;GO:0044464//cell part;GO:0043231//intracellular membrane-bounded organelle;GO:0005623//cell;GO:0005634//nucleus;GO:0043228//non-membrane-bounded organelle;GO:0043232//intracellular non-membrane-bounded organelle;GO:0043229//intracellular organelle;GO:0043226//organelle;GO:0005694//chromosome;GO:0005622//intracellular;GO:0043227//membrane-bounded organelle;GO:0016278…	K11421//histone-lysine N-methyltransferase SETDB1 [EC:2.1.1.43]+ko04550//Signaling pathways regulating pluripotency of stem cells+ko00310//Lysine degradation
100043188	0.1	0.57	2.51096	2.45198e-07	7.61342e-08	Gm10696	GO:0036211//protein modification process;GO:0006511//ubiquitin-dependent protein catabolic process;GO:0050789//regulation of biological process;GO:1901565//organonitrogen compound catabolic process;GO:0016567//protein ubiquitination;GO:0043632//modification-dependent macromolecule catabolic process;GO:0044260//cellular macromolecule metabolic process;GO:0044257//cellular protein catabolic process…	K10523//speckle-type POZ protein+ko04341//Hedgehog signaling pathway - fly+ko04340//Hedgehog signaling pathway
68644	0.15	0.85	2.5025	6.98499e-05	2.81162e-05	Abhd14a	GO:0044421//extracellular region part;GO:0043227//membrane-bounded organelle;GO:0043230//extracellular organelle;GO:0070062//extracellular exosome;GO:0043226//organelle;GO:0031982//vesicle;GO:1903561//extracellular vesicle;GO:0005615//extracellular space;GO:0005576//extracellular region;	K13706//abhydrolase domain-containing protein 14
233189	0.1	0.56	2.48543	1.98677e-07	6.12508e-08	Ctu1	GO:0034660//ncRNA metabolic process;GO:0044260//cellular macromolecule metabolic process;GO:0009451//RNA modification;GO:0034227//tRNA thio-modification;GO:0002097//tRNA wobble base modification;GO:0043412//macromolecule modification;GO:0008033//tRNA processing;GO:0034641//cellular nitrogen compound metabolic process;GO:0002098//tRNA wobble uridine modification;GO:0090304//nucleic acid metabolic …	K14168//cytoplasmic tRNA 2-thiolation protein 1 [EC:2.7.7.-]+ko04122//Sulfur relay system
104027	0.04	0.22	2.45943	1.05365e-05	3.81522e-06	Synpo	GO:0048518//positive regulation of biological process;GO:0032970//regulation of actin filament-based process;GO:0065007//biological regulation;GO:0032233//positive regulation of actin filament bundle assembly;GO:0044087//regulation of cellular component biogenesis;GO:1902905//positive regulation of supramolecular fiber organization;GO:0032231//regulation of actin filament bundle assembly;GO:00511…	K21112//synaptopodin+ko04530//Tight junction;K21112//synaptopodin+ko04530//Tight junction;K21112//synaptopodin+ko04530//Tight junction;K21112//synaptopodin+ko04530//Tight junction;K21112//synaptopodin+ko04530//Tight junction;K21112//synaptopodin+ko04530//Tight junction;K21112//synaptopodin+ko04530//Tight junction
21676	0.04	0.22	2.45943	2.81404e-05	1.07663e-05	Tead1		K09448//transcriptional enhancer factor+ko04391//Hippo signaling pathway - fly+ko04390//Hippo signaling pathway+ko04392//Hippo signaling pathway - multiple species
66840	0.11	0.6	2.44746	5.71385e-08	1.68551e-08	Wdr45b	GO:0008104//protein localization;GO:0009987//cellular process;GO:0006807//nitrogen compound metabolic process;GO:0044267//cellular protein metabolic process;GO:0006464//cellular protein modification process;GO:0044260//cellular macromolecule metabolic process;GO:0042157//lipoprotein metabolic process;GO:0034645//cellular macromolecule biosynthetic process;GO:0034613//cellular protein localization…	K14810//ATP-dependent RNA helicase DDX56/DBP9 [EC:3.6.4.13];K17908//autophagy-related protein 18+ko04140//Autophagy - animal+ko04136//Autophagy - other;K14810//ATP-dependent RNA helicase DDX56/DBP9 [EC:3.6.4.13];K17908//autophagy-related protein 18+ko04140//Autophagy - animal+ko04136//Autophagy - other;K14810//ATP-dependent RNA helicase DDX56/DBP9 [EC:3.6.4.13];K17908//autophagy-related protein 1…
56294	0.1	0.53	2.40599	7.00111e-11	1.64838e-11	Ptpn9	GO:0044464//cell part;GO:0005622//intracellular;GO:0044424//intracellular part;GO:0005737//cytoplasm;GO:0005623//cell;GO:0042578//phosphoric ester hydrolase activity;GO:0016787//hydrolase activity;GO:0140096//catalytic activity, acting on a protein;GO:0004721//phosphoprotein phosphatase activity;GO:0003824//catalytic activity;GO:0016791//phosphatase activity;GO:0004725//protein tyrosine phosphata…	K18038//tyrosine-protein phosphatase non-receptor type 9 [EC:3.1.3.48];K18038//tyrosine-protein phosphatase non-receptor type 9 [EC:3.1.3.48]
16774	0.04	0.21	2.39232	1.02831e-06	3.36934e-07	Lama3	GO:0051179//localization;GO:0098657//import into cell;GO:0050789//regulation of biological process;GO:0030154//cell differentiation;GO:0071840//cellular component organization or biogenesis;GO:2000145//regulation of cell motility;GO:0048869//cellular developmental process;GO:0006810//transport;GO:0050794//regulation of cellular process;GO:0051234//establishment of localization;GO:0001704//formati…	K06240//laminin, alpha 3/5+ko05222//Small cell lung cancer+ko04512//ECM-receptor interaction+ko04510//Focal adhesion+ko05146//Amoebiasis+ko05145//Toxoplasmosis+ko05200//Pathways in cancer+ko04151//PI3K-Akt signaling pathway+ko01100//Metabolic pathways+ko05165//Human papillomavirus infection
226896	0.05	0.26	2.37851	1.65069e-05	6.14468e-06	Tfap2d	GO:0006807//nitrogen compound metabolic process;GO:0031323//regulation of cellular metabolic process;GO:0031326//regulation of cellular biosynthetic process;GO:0080090//regulation of primary metabolic process;GO:0051252//regulation of RNA metabolic process;GO:0044249//cellular biosynthetic process;GO:0044260//cellular macromolecule metabolic process;GO:1901362//organic cyclic compound biosyntheti…	K09178//transcription factor AP-2 delta
105247297	1.27	6.51	2.35783	6.2067e-58	2.9634e-59	LOC105247297	GO:0019219//regulation of nucleobase-containing compound metabolic process;GO:0009889//regulation of biosynthetic process;GO:0080090//regulation of primary metabolic process;GO:1903506//regulation of nucleic acid-templated transcription;GO:0051171//regulation of nitrogen compound metabolic process;GO:0006355//regulation of transcription, DNA-templated;GO:0010468//regulation of gene expression;GO:…	K09228//KRAB domain-containing zinc finger protein;K09228//KRAB domain-containing zinc finger protein
100038847	0.14	0.7	2.32193	3.1785e-07	9.98556e-08	Gm10406
140493	0	0.05	2.32193	0.000210739	8.9785e-05	Kcnn3	GO:0050789//regulation of biological process;GO:0060341//regulation of cellular localization;GO:1904951//positive regulation of establishment of protein localization;GO:0033157//regulation of intracellular protein transport;GO:1903214//regulation of protein targeting to mitochondrion;GO:1903533//regulation of protein targeting;GO:0051222//positive regulation of protein transport;GO:0032880//regul…	K04944//potassium intermediate/small conductance calcium-activated channel subfamily N member 3+ko04911//Insulin secretion
170755	0.03	0.15	2.32193	8.23383e-06	2.9513e-06	Sgk3	GO:0044267//cellular protein metabolic process;GO:0051716//cellular response to stimulus;GO:0023052//signaling;GO:0007154//cell communication;GO:0001558//regulation of cell growth;GO:0008152//metabolic process;GO:0060548//negative regulation of cell death;GO:0044237//cellular metabolic process;GO:0051050//positive regulation of transport;GO:2001234//negative regulation of apoptotic signaling path…	K13304//serum/glucocorticoid-regulated kinase 3 [EC:2.7.11.1]+ko04151//PI3K-Akt signaling pathway+ko04068//FoxO signaling pathway;K13304//serum/glucocorticoid-regulated kinase 3 [EC:2.7.11.1]+ko04151//PI3K-Akt signaling pathway+ko04068//FoxO signaling pathway;K13304//serum/glucocorticoid-regulated kinase 3 [EC:2.7.11.1]+ko04151//PI3K-Akt signaling pathway+ko04068//FoxO signaling pathway
17756	0.03	0.15	2.32193	6.91511e-10	1.74808e-10	Map2	GO:0050793//regulation of developmental process;GO:0022603//regulation of anatomical structure morphogenesis;GO:0021954//central nervous system neuron development;GO:0016043//cellular component organization;GO:0000904//cell morphogenesis involved in differentiation;GO:0050767//regulation of neurogenesis;GO:0048667//cell morphogenesis involved in neuron differentiation;GO:0030182//neuron different…	K10430//microtubule-associated protein 2;K10430//microtubule-associated protein 2;K10430//microtubule-associated protein 2;K10430//microtubule-associated protein 2;K10430//microtubule-associated protein 2;K10430//microtubule-associated protein 2
18979	0.14	0.7	2.32193	1.65097e-05	6.14468e-06	Pon1	GO:0006650//glycerophospholipid metabolic process;GO:0042221//response to chemical;GO:0051049//regulation of transport;GO:0050789//regulation of biological process;GO:0009605//response to external stimulus;GO:1902652//secondary alcohol metabolic process;GO:0032370//positive regulation of lipid transport;GO:1902617//response to fluoride;GO:0003008//system process;GO:0032376//positive regulation of…	K01045//arylesterase / paraoxonase [EC:3.1.1.2 3.1.8.1]
20538	0	0.05	2.32193	0.000682999	0.000313822	Slc6a2	GO:0033555//multicellular organismal response to stress;GO:0006810//transport;GO:0015850//organic hydroxy compound transport;GO:0051179//localization;GO:0006950//response to stress;GO:0015874//norepinephrine transport;GO:0042221//response to chemical;GO:0032501//multicellular organismal process;GO:0015844//monoamine transport;GO:0071702//organic substance transport;GO:0071705//nitrogen compound t…	K05035//solute carrier family 6 (neurotransmitter transporter, noradrenalin) member 2
227723	0.02	0.1	2.32193	0.000539211	0.000244524	Prrc2b	GO:0009987//cellular process;GO:0048869//cellular developmental process;GO:0030154//cell differentiation;GO:0032502//developmental process;GO:0097159//organic cyclic compound binding;GO:0005488//binding;GO:1901363//heterocyclic compound binding;GO:0003723//RNA binding;GO:0003676//nucleic acid binding;	K13219//splicing factor, proline- and glutamine-rich;K14971//nuclear receptor coactivator 6;K13219//splicing factor, proline- and glutamine-rich;K04650//nuclear receptor co-repressor 1+ko01522//Endocrine resistance+ko04919//Thyroid hormone signaling pathway+ko05202//Transcriptional misregulation in cancer;K13219//splicing factor, proline- and glutamine-rich;K04650//nuclear receptor co-repressor 1…
547253	0	0.05	2.32193	0.000378846	0.000167858	Parp14	GO:0006355//regulation of transcription, DNA-templated;GO:0044267//cellular protein metabolic process;GO:0031324//negative regulation of cellular metabolic process;GO:0009893//positive regulation of metabolic process;GO:0031323//regulation of cellular metabolic process;GO:0051173//positive regulation of nitrogen compound metabolic process;GO:0031399//regulation of protein modification process;GO:…	K15261//poly [ADP-ribose] polymerase 10/14/15 [EC:2.4.2.30]
629016	0.11	0.55	2.32193	3.28747e-12	7.07464e-13	Zfp953	GO:0010556//regulation of macromolecule biosynthetic process;GO:2001141//regulation of RNA biosynthetic process;GO:1903506//regulation of nucleic acid-templated transcription;GO:0051252//regulation of RNA metabolic process;GO:0019222//regulation of metabolic process;GO:0010468//regulation of gene expression;GO:0051171//regulation of nitrogen compound metabolic process;GO:0080090//regulation of pr…	K09228//KRAB domain-containing zinc finger protein
77519	0.02	0.1	2.32193	0.000577943	0.000263364	Zfp266	GO:0060255//regulation of macromolecule metabolic process;GO:0031323//regulation of cellular metabolic process;GO:0065007//biological regulation;GO:0006355//regulation of transcription, DNA-templated;GO:0031326//regulation of cellular biosynthetic process;GO:0051171//regulation of nitrogen compound metabolic process;GO:2000112//regulation of cellular macromolecule biosynthetic process;GO:0050789/…	K09228//KRAB domain-containing zinc finger protein;K09228//KRAB domain-containing zinc finger protein
100039139	0.49	2.43	2.3101	3.71584e-08	1.08253e-08	Ccdc152		K16461//centrosomal protein CEP135;K16551//A-kinase anchor protein 9
110886	0.25	1.23	2.29866	5.83148e-15	1.06589e-15	Gabra5	GO:0099536//synaptic signaling;GO:0007399//nervous system development;GO:0048839//inner ear development;GO:0007275//multicellular organism development;GO:0065007//biological regulation;GO:0051716//cellular response to stimulus;GO:0009987//cellular process;GO:0048523//negative regulation of cellular process;GO:0023052//signaling;GO:0007610//behavior;GO:0043067//regulation of programmed cell death;…	K05175//gamma-aminobutyric acid receptor subunit alpha+ko04727//GABAergic synapse+ko04723//Retrograde endocannabinoid signaling+ko05033//Nicotine addiction+ko05032//Morphine addiction+ko04080//Neuroactive ligand-receptor interaction+ko04742//Taste transduction;K05175//gamma-aminobutyric acid receptor subunit alpha+ko04727//GABAergic synapse+ko04723//Retrograde endocannabinoid signaling+ko05033//N…
18261	0.46	2.26	2.29662	3.29891e-08	9.55862e-09	Ocm	GO:0090066//regulation of anatomical structure size;GO:0055080//cation homeostasis;GO:0032535//regulation of cellular component size;GO:0050793//regulation of developmental process;GO:0043933//macromolecular complex subunit organization;GO:0055065//metal ion homeostasis;GO:0048584//positive regulation of response to stimulus;GO:0048878//chemical homeostasis;GO:0040012//regulation of locomotion;GO…	K05629//atrophin-1 interacting protein 1+ko04151//PI3K-Akt signaling pathway+ko04015//Rap1 signaling pathway;K02183//calmodulin+ko04024//cAMP signaling pathway+ko04022//cGMP-PKG signaling pathway+ko04020//Calcium signaling pathway+ko05133//Pertussis+ko04218//Cellular senescence+ko04070//Phosphatidylinositol signaling system+ko04916//Melanogenesis+ko04915//Estrogen signaling pathway+ko04912//GnRH …
270624	0.08	0.39	2.2854	1.07806e-07	3.25764e-08	Spin4	GO:0048609//multicellular organismal reproductive process;GO:0032504//multicellular organism reproduction;GO:0032501//multicellular organismal process;GO:0022414//reproductive process;GO:0044703//multi-organism reproductive process;GO:0007276//gamete generation;GO:0051704//multi-organism process;GO:0019953//sexual reproduction;GO:0000003//reproduction;
14658	0.18	0.87	2.27302	3.73207e-11	8.61284e-12	Glrb	GO:0006810//transport;GO:0008344//adult locomotory behavior;GO:0007186//G-protein coupled receptor signaling pathway;GO:0016043//cellular component organization;GO:0030534//adult behavior;GO:0051704//multi-organism process;GO:0090659//walking behavior;GO:0098660//inorganic ion transmembrane transport;GO:0007165//signal transduction;GO:0008104//protein localization;GO:0042391//regulation of membra…	K05196//glycine receptor beta+ko04080//Neuroactive ligand-receptor interaction;K05196//glycine receptor beta+ko04080//Neuroactive ligand-receptor interaction
56048	0.49	2.35	2.26181	5.86002e-28	6.09472e-29	Lgals8	GO:0009653//anatomical structure morphogenesis;GO:0030098//lymphocyte differentiation;GO:0006914//autophagy;GO:0050896//response to stimulus;GO:0009987//cellular process;GO:0002263//cell activation involved in immune response;GO:0002696//positive regulation of leukocyte activation;GO:0061919//process utilizing autophagic mechanism;GO:0009615//response to virus;GO:0051707//response to other organi…	K06832//galectin-8
72244	0.09	0.43	2.25634	1.16058e-06	3.81662e-07	1600014C10Rik	GO:0030003//cellular cation homeostasis;GO:0006979//response to oxidative stress;GO:0061919//process utilizing autophagic mechanism;GO:0051560//mitochondrial calcium ion homeostasis;GO:0055065//metal ion homeostasis;GO:0055074//calcium ion homeostasis;GO:0006874//cellular calcium ion homeostasis;GO:0012501//programmed cell death;GO:0042592//homeostatic process;GO:0009987//cellular process;GO:0050…
16952	0.2	0.95	2.24793	2.42837e-06	8.25078e-07	Anxa1	GO:0002250//adaptive immune response;GO:0048534//hematopoietic or lymphoid organ development;GO:0006996//organelle organization;GO:0006811//ion transport;GO:0071702//organic substance transport;GO:0009987//cellular process;GO:0030154//cell differentiation;GO:0006869//lipid transport;GO:0051234//establishment of localization;GO:0050482//arachidonic acid secretion;GO:0051716//cellular response to s…	K17091//annexin A1
BGI_novel_G000713	0.28	1.33	2.24793	4.15923e-09	1.12277e-09	BGI_novel_G000713
108167989	0.53	2.51	2.24362	5.89977e-13	1.2127e-13	LOC108167989		K09228//KRAB domain-containing zinc finger protein
240120	0.26	1.23	2.24207	2.93246e-10	7.23544e-11	Zfp119b	GO:0010556//regulation of macromolecule biosynthetic process;GO:2001141//regulation of RNA biosynthetic process;GO:2000112//regulation of cellular macromolecule biosynthetic process;GO:0065007//biological regulation;GO:0019219//regulation of nucleobase-containing compound metabolic process;GO:0010468//regulation of gene expression;GO:0060255//regulation of macromolecule metabolic process;GO:19035…	K09228//KRAB domain-containing zinc finger protein;K09228//KRAB domain-containing zinc finger protein;K09228//KRAB domain-containing zinc finger protein
22710	0.07	0.33	2.23704	0.000273243	0.000118621	Zfp52	GO:0010468//regulation of gene expression;GO:2001141//regulation of RNA biosynthetic process;GO:0050789//regulation of biological process;GO:2000112//regulation of cellular macromolecule biosynthetic process;GO:0019222//regulation of metabolic process;GO:0031326//regulation of cellular biosynthetic process;GO:0019219//regulation of nucleobase-containing compound metabolic process;GO:0065007//biol…	K09228//KRAB domain-containing zinc finger protein;K09228//KRAB domain-containing zinc finger protein
238722	0.23	1.08	2.23133	4.97246e-15	9.04796e-16	Zfp72	GO:0043903//regulation of symbiosis, encompassing mutualism through parasitism;GO:0031326//regulation of cellular biosynthetic process;GO:1903900//regulation of viral life cycle;GO:0050794//regulation of cellular process;GO:0044794//positive regulation by host of viral process;GO:1903902//positive regulation of viral life cycle;GO:0019219//regulation of nucleobase-containing compound metabolic pr…	K09228//KRAB domain-containing zinc finger protein;K09228//KRAB domain-containing zinc finger protein
13371	0.06	0.28	2.22239	2.43268e-08	6.98274e-09	Dio2	GO:0002237//response to molecule of bacterial origin;GO:0071704//organic substance metabolic process;GO:0042445//hormone metabolic process;GO:0006725//cellular aromatic compound metabolic process;GO:0042886//amide transport;GO:0042403//thyroid hormone metabolic process;GO:0046903//secretion;GO:0030072//peptide hormone secretion;GO:0015833//peptide transport;GO:0006590//thyroid hormone generation;…	K17904//type II thyroxine 5'-deiodinase [EC:1.21.99.4]+ko04919//Thyroid hormone signaling pathway
381066	1.18	5.43	2.20217	4.73441e-59	2.22462e-60	Zfp948	GO:0051171//regulation of nitrogen compound metabolic process;GO:0031323//regulation of cellular metabolic process;GO:2001141//regulation of RNA biosynthetic process;GO:1903506//regulation of nucleic acid-templated transcription;GO:2000112//regulation of cellular macromolecule biosynthetic process;GO:0065007//biological regulation;GO:0009889//regulation of biosynthetic process;GO:0060255//regulat…	K09228//KRAB domain-containing zinc finger protein;K09228//KRAB domain-containing zinc finger protein;K09228//KRAB domain-containing zinc finger protein
16564	0.14	0.64	2.19265	1.44742e-17	2.31788e-18	Kif21a	GO:0009987//cellular process;GO:0007017//microtubule-based process;GO:0007018//microtubule-based movement;GO:0006928//movement of cell or subcellular component;GO:0005623//cell;GO:0044424//intracellular part;GO:0005871//kinesin complex;GO:0036477//somatodendritic compartment;GO:0099513//polymeric cytoskeletal fiber;GO:0099080//supramolecular complex;GO:0044422//organelle part;GO:0099081//supramol…	K10395//kinesin family member 4/21/27;K10395//kinesin family member 4/21/27;K10395//kinesin family member 4/21/27;K10395//kinesin family member 4/21/27;K10395//kinesin family member 4/21/27;K10395//kinesin family member 4/21/27;K10395//kinesin family member 4/21/27;K10395//kinesin family member 4/21/27;K10395//kinesin family member 4/21/27;K10395//kinesin family member 4/21/27;K10395//kinesin fam…
378431	0.07	0.32	2.19265	8.54419e-07	2.7807e-07	Txlnb	GO:0044464//cell part;GO:0005737//cytoplasm;GO:0044424//intracellular part;GO:0005623//cell;GO:0005622//intracellular;GO:0005488//binding;GO:0005515//protein binding;GO:0019905//syntaxin binding;GO:0000149//SNARE binding;	K18626//trichohyalin
57319	0.14	0.64	2.19265	1.23605e-05	4.54038e-06	Smpdl3a	GO:0019637//organophosphate metabolic process;GO:0044238//primary metabolic process;GO:0006796//phosphate-containing compound metabolic process;GO:0044237//cellular metabolic process;GO:0046700//heterocycle catabolic process;GO:1901575//organic substance catabolic process;GO:0006753//nucleoside phosphate metabolic process;GO:0055086//nucleobase-containing small molecule metabolic process;GO:00346…	K01128//sphingomyelin phosphodiesterase acid-like 3 [EC:3.1.4.-]
BGI_novel_G000279	0.33	1.5	2.18442	1.79907e-06	6.04796e-07	BGI_novel_G000279	GO:0051047//positive regulation of secretion;GO:0031323//regulation of cellular metabolic process;GO:0032732//positive regulation of interleukin-1 production;GO:0001817//regulation of cytokine production;GO:0009607//response to biotic stimulus;GO:0009987//cellular process;GO:0010941//regulation of cell death;GO:0051345//positive regulation of hydrolase activity;GO:0042221//response to chemical;GO…	K12798//NACHT, LRR and PYD domains-containing protein 1+ko04621//NOD-like receptor signaling pathway
BGI_novel_G000380	0.21	0.95	2.17754	0.000321003	0.000140772	BGI_novel_G000380	GO:0097159//organic cyclic compound binding;GO:0005488//binding;GO:1901363//heterocyclic compound binding;GO:0003676//nucleic acid binding;GO:0003723//RNA binding;	K12881//THO complex subunit 4+ko03040//Spliceosome+ko03013//RNA transport+ko03015//mRNA surveillance pathway+ko05168//Herpes simplex infection
57895	0.44	1.99	2.17719	4.62859e-20	6.58016e-21	Ccdc126	GO:0071704//organic substance metabolic process;GO:0009100//glycoprotein metabolic process;GO:0008152//metabolic process;GO:0006464//cellular protein modification process;GO:0006807//nitrogen compound metabolic process;GO:0043170//macromolecule metabolic process;GO:1901137//carbohydrate derivative biosynthetic process;GO:0006486//protein glycosylation;GO:0009059//macromolecule biosynthetic proces…	K00744//alpha-1,3(6)-mannosylglycoprotein beta-1,6-N-acetyl-glucosaminyltransferase [EC:2.4.1.155]+ko00510//N-Glycan biosynthesis+ko01100//Metabolic pathways
11676	0.08	0.36	2.16993	6.29825e-05	2.51652e-05	Aldoc	GO:0017144//drug metabolic process;GO:0048869//cellular developmental process;GO:0019693//ribose phosphate metabolic process;GO:0009135//purine nucleoside diphosphate metabolic process;GO:0006793//phosphorus metabolic process;GO:0019362//pyridine nucleotide metabolic process;GO:0006091//generation of precursor metabolites and energy;GO:0044281//small molecule metabolic process;GO:0016310//phospho…	K01623//fructose-bisphosphate aldolase, class I [EC:4.1.2.13]+ko01200//Carbon metabolism+ko00010//Glycolysis / Gluconeogenesis+ko01230//Biosynthesis of amino acids+ko00051//Fructose and mannose metabolism+ko00030//Pentose phosphate pathway+ko01100//Metabolic pathways
80838	0.31	1.37	2.14384	0.000151034	6.32618e-05	Hist1h1a	GO:0006333//chromatin assembly or disassembly;GO:0007276//gamete generation;GO:0006996//organelle organization;GO:0044703//multi-organism reproductive process;GO:0060627//regulation of vesicle-mediated transport;GO:0000003//reproduction;GO:0065004//protein-DNA complex assembly;GO:0022414//reproductive process;GO:0044085//cellular component biogenesis;GO:0065007//biological regulation;GO:0048609//…	K11275//histone H1/5
271639	0.05	0.22	2.1375	0.000760768	0.000352482	Adcy10	GO:1901362//organic cyclic compound biosynthetic process;GO:0052652//cyclic purine nucleotide metabolic process;GO:0071704//organic substance metabolic process;GO:0009117//nucleotide metabolic process;GO:0034654//nucleobase-containing compound biosynthetic process;GO:0006928//movement of cell or subcellular component;GO:0042221//response to chemical;GO:0007154//cell communication;GO:0007018//micr…	K11265//adenylate cyclase 10 [EC:4.6.1.1]+ko04024//cAMP signaling pathway+ko00230//Purine metabolism+ko04714//Thermogenesis+ko04713//Circadian entrainment+ko04371//Apelin signaling pathway
75985	0.19	0.83	2.12711	8.86119e-18	1.40617e-18	Rab30	GO:0071840//cellular component organization or biogenesis;GO:0006996//organelle organization;GO:0009987//cellular process;GO:0010256//endomembrane system organization;GO:0016043//cellular component organization;GO:0007030//Golgi organization;GO:0005622//intracellular;GO:0043229//intracellular organelle;GO:0043226//organelle;GO:0044444//cytoplasmic part;GO:0098588//bounding membrane of organelle;G…	K07917//Ras-related protein Rab-30
13370	0.11	0.48	2.12553	0.000320957	0.000140772	Dio1	GO:0042446//hormone biosynthetic process;GO:0042445//hormone metabolic process;GO:0065008//regulation of biological quality;GO:0008152//metabolic process;GO:0009058//biosynthetic process;GO:0065007//biological regulation;GO:0010817//regulation of hormone levels;GO:0005783//endoplasmic reticulum;GO:0012505//endomembrane system;GO:0005623//cell;GO:0043227//membrane-bounded organelle;GO:0042175//nuc…	K01562//type I thyroxine 5'-deiodinase [EC:1.21.99.4]+ko04919//Thyroid hormone signaling pathway
381476	0.06	0.26	2.11548	0.00023163	9.97082e-05	Stpg2
50876	0.06	0.26	2.11548	1.14895e-11	2.55732e-12	Tmod2	GO:0009966//regulation of signal transduction;GO:0023052//signaling;GO:1902903//regulation of supramolecular fiber organization;GO:0008064//regulation of actin polymerization or depolymerization;GO:0043242//negative regulation of protein complex disassembly;GO:0003012//muscle system process;GO:0033043//regulation of organelle organization;GO:0007010//cytoskeleton organization;GO:0097435//supramol…	K10370//tropomodulin
20503	0.4	1.73	2.1127	7.86837e-16	1.37814e-16	Slc16a7	GO:0006820//anion transport;GO:0034220//ion transmembrane transport;GO:0046942//carboxylic acid transport;GO:0015850//organic hydroxy compound transport;GO:0098656//anion transmembrane transport;GO:0006811//ion transport;GO:1905039//carboxylic acid transmembrane transport;GO:0015711//organic anion transport;GO:0006848//pyruvate transport;GO:0015718//monocarboxylic acid transport;GO:0055085//trans…	K08184//MFS transporter, MCP family, solute carrier family 16 (monocarboxylic acid transporters), member 7;K08184//MFS transporter, MCP family, solute carrier family 16 (monocarboxylic acid transporters), member 7
209027	0.16	0.69	2.10852	8.54584e-07	2.7807e-07	Pycr1	GO:0055129//L-proline biosynthetic process;GO:1902882//regulation of response to oxidative stress;GO:0048519//negative regulation of biological process;GO:0008152//metabolic process;GO:1901605//alpha-amino acid metabolic process;GO:0051716//cellular response to stimulus;GO:1901607//alpha-amino acid biosynthetic process;GO:2001024//negative regulation of response to drug;GO:0048583//regulation of …	K00286//pyrroline-5-carboxylate reductase [EC:1.5.1.2]+ko00330//Arginine and proline metabolism+ko01230//Biosynthesis of amino acids+ko01100//Metabolic pathways;K00286//pyrroline-5-carboxylate reductase [EC:1.5.1.2]+ko00330//Arginine and proline metabolism+ko01230//Biosynthesis of amino acids+ko01100//Metabolic pathways;K00286//pyrroline-5-carboxylate reductase [EC:1.5.1.2]+ko00330//Arginine and …
100039890	1.9	8.09	2.09014	5.23991e-61	2.33656e-62	Gm15093		K14959//histone-lysine N-methyltransferase MLL4 [EC:2.1.1.43]+ko00310//Lysine degradation;K06824//nephronectin;K20364//multiple coagulation factor deficiency protein 2
14168	0.12	0.51	2.08746	7.06486e-05	2.84644e-05	Fgf13	GO:0010721//negative regulation of cell development;GO:0044085//cellular component biogenesis;GO:0031344//regulation of cell projection organization;GO:0048513//animal organ development;GO:0048699//generation of neurons;GO:0043412//macromolecule modification;GO:0071822//protein complex subunit organization;GO:0045926//negative regulation of growth;GO:0061351//neural precursor cell proliferation;G…	K22413//fibroblast growth factor 11/12/13/14;K22413//fibroblast growth factor 11/12/13/14
22067	0.05	0.21	2.07039	5.6343e-07	1.80489e-07	Trpc5	GO:0050770//regulation of axonogenesis;GO:0030001//metal ion transport;GO:0042592//homeostatic process;GO:0072507//divalent inorganic cation homeostasis;GO:0050789//regulation of biological process;GO:0051961//negative regulation of nervous system development;GO:0045937//positive regulation of phosphate metabolic process;GO:0048856//anatomical structure development;GO:0048699//generation of neuro…	K04968//transient receptor potential cation channel subfamily C member 5+ko04360//Axon guidance
16579	0.28	1.17	2.06301	7.86251e-18	1.24422e-18	Kifap3	GO:0006928//movement of cell or subcellular component;GO:0043066//negative regulation of apoptotic process;GO:0060548//negative regulation of cell death;GO:0065007//biological regulation;GO:0007017//microtubule-based process;GO:0048523//negative regulation of cellular process;GO:0042981//regulation of apoptotic process;GO:0043067//regulation of programmed cell death;GO:0061024//membrane organizat…
630579	0.26	1.08	2.05445	7.40283e-19	1.11965e-19	Zfp808	GO:0065007//biological regulation;GO:0051171//regulation of nitrogen compound metabolic process;GO:0019222//regulation of metabolic process;GO:0050794//regulation of cellular process;GO:0080090//regulation of primary metabolic process;GO:0031326//regulation of cellular biosynthetic process;GO:0031323//regulation of cellular metabolic process;GO:2000112//regulation of cellular macromolecule biosyn…	K09228//KRAB domain-containing zinc finger protein;K09228//KRAB domain-containing zinc finger protein;K09228//KRAB domain-containing zinc finger protein
52323	0.21	0.87	2.05063	1.71478e-11	3.86326e-12	Klhl7	GO:0009987//cellular process;GO:0032446//protein modification by small protein conjugation;GO:0036211//protein modification process;GO:1901564//organonitrogen compound metabolic process;GO:0008152//metabolic process;GO:0044267//cellular protein metabolic process;GO:0070647//protein modification by small protein conjugation or removal;GO:0006464//cellular protein modification process;GO:0043412//m…	K10445//kelch-like protein 7
623046	0.15	0.62	2.04731	1.8892e-09	4.93778e-10	Fscb		K12567//titin [EC:2.7.11.1]+ko05414//Dilated cardiomyopathy (DCM)+ko05410//Hypertrophic cardiomyopathy (HCM)
BGI_novel_G000060	3.37	13.92	2.04634	2.19951e-103	5.16062e-105	BGI_novel_G000060		K19528//synaptonemal complex protein 3+ko03440//Homologous recombination
246730	0.08	0.33	2.04439	0.000454834	0.000203736	Oas1a	GO:0019438//aromatic compound biosynthetic process;GO:0090407//organophosphate biosynthetic process;GO:0072522//purine-containing compound biosynthetic process;GO:0006796//phosphate-containing compound metabolic process;GO:0009058//biosynthetic process;GO:0051607//defense response to virus;GO:0050789//regulation of biological process;GO:0009987//cellular process;GO:0044237//cellular metabolic pro…	K14216//2'-5'-oligoadenylate synthetase [EC:2.7.7.84]+ko04621//NOD-like receptor signaling pathway+ko05160//Hepatitis C+ko05162//Measles+ko05164//Influenza A+ko05168//Herpes simplex infection
238384	0.09	0.37	2.03953	5.21102e-06	1.83101e-06	Slc24a4	GO:0034220//ion transmembrane transport;GO:0032501//multicellular organismal process;GO:0048513//animal organ development;GO:0048731//system development;GO:0006816//calcium ion transport;GO:0097186//amelogenesis;GO:0007608//sensory perception of smell;GO:0098655//cation transmembrane transport;GO:0006875//cellular metal ion homeostasis;GO:0042475//odontogenesis of dentin-containing tooth;GO:00300…	K13752//solute carrier family 24 (sodium/potassium/calcium exchanger), member 4+ko04740//Olfactory transduction
100039441	0.14	0.57	2.02554	3.50546e-07	1.10326e-07	Gm2237
20859	0.4	1.62	2.01792	2.30814e-07	7.15226e-08	Sult2a1	GO:1901360//organic cyclic compound metabolic process;GO:0051923//sulfation;GO:0008152//metabolic process;GO:0071704//organic substance metabolic process;GO:0044238//primary metabolic process;GO:0009987//cellular process;GO:0006790//sulfur compound metabolic process;GO:0044237//cellular metabolic process;GO:0008202//steroid metabolic process;GO:0006629//lipid metabolic process;GO:0044444//cytopla…	K11822//bile-salt sulfotransferase [EC:2.8.2.14]+ko00980//Metabolism of xenobiotics by cytochrome P450+ko04976//Bile secretion+ko05204//Chemical carcinogenesis;K11822//bile-salt sulfotransferase [EC:2.8.2.14]+ko00980//Metabolism of xenobiotics by cytochrome P450+ko04976//Bile secretion+ko05204//Chemical carcinogenesis
635702	0.5	2.01	2.0072	4.70984e-15	8.56118e-16	Naaladl2	GO:0031224//intrinsic component of membrane;GO:0016020//membrane;GO:0044425//membrane part;GO:0016021//integral component of membrane;	K01301//N-acetylated-alpha-linked acidic dipeptidase [EC:3.4.17.21];K01301//N-acetylated-alpha-linked acidic dipeptidase [EC:3.4.17.21];K01301//N-acetylated-alpha-linked acidic dipeptidase [EC:3.4.17.21];K01301//N-acetylated-alpha-linked acidic dipeptidase [EC:3.4.17.21]
18414	0.06	0.24	2	0.000264958	0.000114723	Osmr	GO:0042127//regulation of cell proliferation;GO:0042221//response to chemical;GO:0038165//oncostatin-M-mediated signaling pathway;GO:0050794//regulation of cellular process;GO:0010033//response to organic substance;GO:0065007//biological regulation;GO:0007166//cell surface receptor signaling pathway;GO:0070887//cellular response to chemical stimulus;GO:0048522//positive regulation of cellular pro…	K05057//oncostatin M receptor+ko04630//Jak-STAT signaling pathway+ko04151//PI3K-Akt signaling pathway+ko04060//Cytokine-cytokine receptor interaction;K05057//oncostatin M receptor+ko04630//Jak-STAT signaling pathway+ko04151//PI3K-Akt signaling pathway+ko04060//Cytokine-cytokine receptor interaction
75580	0	0.04	2	0.000681689	0.000313822	Zbtb4	GO:0051171//regulation of nitrogen compound metabolic process;GO:2001141//regulation of RNA biosynthetic process;GO:0000122//negative regulation of transcription from RNA polymerase II promoter;GO:0010605//negative regulation of macromolecule metabolic process;GO:0010468//regulation of gene expression;GO:1902679//negative regulation of RNA biosynthetic process;GO:0006355//regulation of transcript…	K10491//zinc finger and BTB domain-containing protein 4
100503353	0.59	2.34	1.98772	2.59172e-30	2.49446e-31	Gm14440	GO:2001141//regulation of RNA biosynthetic process;GO:1903506//regulation of nucleic acid-templated transcription;GO:0065007//biological regulation;GO:0010556//regulation of macromolecule biosynthetic process;GO:0051252//regulation of RNA metabolic process;GO:0031326//regulation of cellular biosynthetic process;GO:0060255//regulation of macromolecule metabolic process;GO:0019219//regulation of nu…	K09228//KRAB domain-containing zinc finger protein
213389	0.23	0.91	1.98423	1.40903e-12	2.96826e-13	Prdm9	GO:0019222//regulation of metabolic process;GO:0050794//regulation of cellular process;GO:1903506//regulation of nucleic acid-templated transcription;GO:0031323//regulation of cellular metabolic process;GO:0080090//regulation of primary metabolic process;GO:0050789//regulation of biological process;GO:0009889//regulation of biosynthetic process;GO:2001141//regulation of RNA biosynthetic process;G…	K09228//KRAB domain-containing zinc finger protein;K09228//KRAB domain-containing zinc finger protein;K09228//KRAB domain-containing zinc finger protein
11722	0.47	1.84	1.96897	1.05735e-11	2.3461e-12	Amy1	GO:1901575//organic substance catabolic process;GO:0009056//catabolic process;GO:0071704//organic substance metabolic process;GO:0005975//carbohydrate metabolic process;GO:0016052//carbohydrate catabolic process;GO:0008152//metabolic process;GO:0044238//primary metabolic process;GO:1903561//extracellular vesicle;GO:0005615//extracellular space;GO:0005576//extracellular region;GO:0043230//extracel…	K01176//alpha-amylase [EC:3.2.1.1]+ko00500//Starch and sucrose metabolism+ko04973//Carbohydrate digestion and absorption+ko01100//Metabolic pathways
68972	0.56	2.18	1.96083	3.28442e-10	8.12664e-11	Tatdn3	GO:0005739//mitochondrion;GO:0005622//intracellular;GO:0043231//intracellular membrane-bounded organelle;GO:0044424//intracellular part;GO:0005737//cytoplasm;GO:0044464//cell part;GO:0005634//nucleus;GO:0043229//intracellular organelle;GO:0044444//cytoplasmic part;GO:0005623//cell;GO:0043226//organelle;GO:0043227//membrane-bounded organelle;GO:0046872//metal ion binding;GO:0043167//ion binding;GO…	K03424//TatD DNase family protein [EC:3.1.21.-]
100043915	0.35	1.36	1.95818	5.82901e-21	7.9779e-22	Gm4724	GO:0051252//regulation of RNA metabolic process;GO:0019222//regulation of metabolic process;GO:0080090//regulation of primary metabolic process;GO:0010468//regulation of gene expression;GO:1903506//regulation of nucleic acid-templated transcription;GO:0009889//regulation of biosynthetic process;GO:0051171//regulation of nitrogen compound metabolic process;GO:0010556//regulation of macromolecule b…	K09228//KRAB domain-containing zinc finger protein
100039763	0.43	1.66	1.94877	2.37594e-05	9.00624e-06	Gm2411	GO:0016021//integral component of membrane;GO:0030054//cell junction;GO:0005923//bicellular tight junction;GO:0044425//membrane part;GO:0070160//occluding junction;GO:0043296//apical junction complex;GO:0005911//cell-cell junction;GO:0031224//intrinsic component of membrane;GO:0016020//membrane;GO:0005198//structural molecule activity;	K06087//claudin+ko04514//Cell adhesion molecules (CAMs)+ko04530//Tight junction+ko04670//Leukocyte transendothelial migration+ko05160//Hepatitis C
218314	0.14	0.54	1.94753	2.51866e-08	7.23906e-09	Zfp595	GO:0031326//regulation of cellular biosynthetic process;GO:0010468//regulation of gene expression;GO:0051252//regulation of RNA metabolic process;GO:0051171//regulation of nitrogen compound metabolic process;GO:2000112//regulation of cellular macromolecule biosynthetic process;GO:0006355//regulation of transcription, DNA-templated;GO:0050789//regulation of biological process;GO:0010556//regulatio…	K09228//KRAB domain-containing zinc finger protein;K09228//KRAB domain-containing zinc finger protein
328572	0.07	0.27	1.94753	1.2425e-08	3.48652e-09	Ep300	GO:0009987//cellular process;GO:0030154//cell differentiation;GO:0048513//animal organ development;GO:0006355//regulation of transcription, DNA-templated;GO:0008219//cell death;GO:0048731//system development;GO:0048869//cellular developmental process;GO:0001775//cell activation;GO:0010556//regulation of macromolecule biosynthetic process;GO:0009887//animal organ morphogenesis;GO:0006915//apoptoti…	K04498//E1A/CREB-binding protein [EC:2.3.1.48]+ko04024//cAMP signaling pathway+ko04630//Jak-STAT signaling pathway+ko04350//TGF-beta signaling pathway+ko04919//Thyroid hormone signaling pathway+ko04916//Melanogenesis+ko04310//Wnt signaling pathway+ko04720//Long-term potentiation+ko05215//Prostate cancer+ko05211//Renal cell carcinoma+ko05200//Pathways in cancer+ko05203//Viral carcinogenesis+ko0520…
BGI_novel_G000499	0.23	0.88	1.93587	0.000539136	0.000244524	BGI_novel_G000499	GO:0006405//RNA export from nucleus;GO:0010604//positive regulation of macromolecule metabolic process;GO:0097659//nucleic acid-templated transcription;GO:1901361//organic cyclic compound catabolic process;GO:0051236//establishment of RNA localization;GO:0045948//positive regulation of translational initiation;GO:0000956//nuclear-transcribed mRNA catabolic process;GO:0043903//regulation of symbio…	K03012//DNA-directed RNA polymerase II subunit RPB4+ko00230//Purine metabolism+ko03020//RNA polymerase+ko00240//Pyrimidine metabolism+ko05016//Huntington's disease+ko01100//Metabolic pathways+ko05169//Epstein-Barr virus infection
52837	0.4	1.52	1.926	1.72368e-28	1.7601e-29	Tmx4	GO:0050789//regulation of biological process;GO:0034976//response to endoplasmic reticulum stress;GO:0019725//cellular homeostasis;GO:0055114//oxidation-reduction process;GO:0045454//cell redox homeostasis;GO:0065007//biological regulation;GO:0050896//response to stimulus;GO:0050794//regulation of cellular process;GO:0008152//metabolic process;GO:0033554//cellular response to stress;GO:0042592//h…	K16458//centrosomal protein CEP104;K19607//X-linked retinitis pigmentosa GTPase regulator
BGI_novel_G000548	0.34	1.29	1.92376	0.00037873	0.000168046	BGI_novel_G000548
258518	0.31	1.17	1.91617	0.000403629	0.000179756	Olfr847	GO:0003008//system process;GO:0007600//sensory perception;GO:0050794//regulation of cellular process;GO:0050911//detection of chemical stimulus involved in sensory perception of smell;GO:0032501//multicellular organismal process;GO:0042221//response to chemical;GO:0050906//detection of stimulus involved in sensory perception;GO:0009593//detection of chemical stimulus;GO:0050896//response to stimu…	K04257//olfactory receptor+ko04740//Olfactory transduction
13179	0.17	0.64	1.91254	5.44395e-05	2.15904e-05	Dcn	GO:0007568//aging;GO:0048522//positive regulation of cellular process;GO:0010468//regulation of gene expression;GO:2000021//regulation of ion homeostasis;GO:0044260//cellular macromolecule metabolic process;GO:0002237//response to molecule of bacterial origin;GO:0009607//response to biotic stimulus;GO:0019222//regulation of metabolic process;GO:0051271//negative regulation of cellular component m…	K04660//decorin+ko04350//TGF-beta signaling pathway+ko05205//Proteoglycans in cancer
16562	0.04	0.15	1.90689	0.000817367	0.000380304	Kif1c	GO:0007018//microtubule-based movement;GO:0051641//cellular localization;GO:0051649//establishment of localization in cell;GO:0046907//intracellular transport;GO:0006890//retrograde vesicle-mediated transport, Golgi to ER;GO:0051179//localization;GO:0051234//establishment of localization;GO:0009987//cellular process;GO:0030705//cytoskeleton-dependent intracellular transport;GO:0016192//vesicle-me…	K10392//kinesin family member 1
78771	0.3	1.12	1.90046	1.95328e-16	3.31152e-17	Mctp1	GO:0045202//synapse;GO:0044422//organelle part;GO:0098827//endoplasmic reticulum subcompartment;GO:0097458//neuron part;GO:0031224//intrinsic component of membrane;GO:0070382//exocytic vesicle;GO:0044464//cell part;GO:0043226//organelle;GO:0005768//endosome;GO:0098588//bounding membrane of organelle;GO:0044446//intracellular organelle part;GO:0005737//cytoplasm;GO:0005789//endoplasmic reticulum m…	K19938//rabphilin-3A
381393	0.26	0.97	1.89947	5.16649e-09	1.40738e-09	4921509C19Rik	GO:0036211//protein modification process;GO:0009966//regulation of signal transduction;GO:0051276//chromosome organization;GO:0006325//chromatin organization;GO:0031669//cellular response to nutrient levels;GO:0071496//cellular response to external stimulus;GO:0006807//nitrogen compound metabolic process;GO:0009968//negative regulation of signal transduction;GO:0006793//phosphorus metabolic proce…	K08798//MAP/microtubule affinity-regulating kinase [EC:2.7.11.1]
67073	0.11	0.41	1.89812	1.11354e-05	4.05736e-06	Pi4k2b	GO:0046488//phosphatidylinositol metabolic process;GO:0030258//lipid modification;GO:0006650//glycerophospholipid metabolic process;GO:0019637//organophosphate metabolic process;GO:0006796//phosphate-containing compound metabolic process;GO:0044255//cellular lipid metabolic process;GO:0044237//cellular metabolic process;GO:0016043//cellular component organization;GO:0071704//organic substance met…	K13711//phosphatidylinositol 4-kinase type 2 [EC:2.7.1.67]+ko04070//Phosphatidylinositol signaling system+ko00562//Inositol phosphate metabolism+ko01100//Metabolic pathways
101055987	3.95	14.63	1.88901	1.88393e-55	9.39884e-57	Gm29758		K09228//KRAB domain-containing zinc finger protein
242700	0.06	0.22	1.87447	0.000569431	0.000259162	Ifnlr1	GO:0007165//signal transduction;GO:0051607//defense response to virus;GO:0002376//immune system process;GO:0009987//cellular process;GO:0007166//cell surface receptor signaling pathway;GO:0050789//regulation of biological process;GO:0051707//response to other organism;GO:0050691//regulation of defense response to virus by host;GO:0002682//regulation of immune system process;GO:0031347//regulation…	K05140//interferon lambda receptor 1+ko04630//Jak-STAT signaling pathway+ko04060//Cytokine-cytokine receptor interaction
30940	0.15	0.55	1.87447	9.027e-09	2.51082e-09	Usp25	GO:1901565//organonitrogen compound catabolic process;GO:0044238//primary metabolic process;GO:0080135//regulation of cellular response to stress;GO:0031329//regulation of cellular catabolic process;GO:0051246//regulation of protein metabolic process;GO:0010605//negative regulation of macromolecule metabolic process;GO:0051248//negative regulation of protein metabolic process;GO:0031324//negative…	K11849//ubiquitin carboxyl-terminal hydrolase 25 [EC:3.4.19.12]+ko04657//IL-17 signaling pathway
75051	1.18	4.32	1.87224	2.18242e-25	2.49144e-26	Ccdc173		K00476//aspartate beta-hydroxylase [EC:1.14.11.16]
21942	0.17	0.62	1.86673	3.82516e-05	1.48664e-05	Tnfrsf9	GO:0032695//negative regulation of interleukin-12 production;GO:0006955//immune response;GO:0007275//multicellular organism development;GO:0009607//response to biotic stimulus;GO:0043067//regulation of programmed cell death;GO:0022607//cellular component assembly;GO:0032653//regulation of interleukin-10 production;GO:0042221//response to chemical;GO:0043933//macromolecular complex subunit organiz…	K05146//tumor necrosis factor receptor superfamily member 9+ko04060//Cytokine-cytokine receptor interaction;K05146//tumor necrosis factor receptor superfamily member 9+ko04060//Cytokine-cytokine receptor interaction
102639505	0.16	0.58	1.85798	8.81162e-07	2.86996e-07	LOC102639505	GO:0060255//regulation of macromolecule metabolic process;GO:0009889//regulation of biosynthetic process;GO:0006355//regulation of transcription, DNA-templated;GO:1903506//regulation of nucleic acid-templated transcription;GO:0031323//regulation of cellular metabolic process;GO:0050794//regulation of cellular process;GO:0051171//regulation of nitrogen compound metabolic process;GO:2001141//regula…	K09228//KRAB domain-containing zinc finger protein;K09228//KRAB domain-containing zinc finger protein
547447	0.32	1.16	1.85798	2.4787e-07	7.70266e-08	Gm6038		K22823//non-structural maintenance of chromosomes element 3;K22823//non-structural maintenance of chromosomes element 3
BGI_novel_G000744	0.45	1.61	1.83906	1.27937e-07	3.88854e-08	BGI_novel_G000744
76453	0.27	0.96	1.83007	8.83759e-06	3.1783e-06	Prss23	GO:0043229//intracellular organelle;GO:0005623//cell;GO:0070062//extracellular exosome;GO:0043230//extracellular organelle;GO:0044464//cell part;GO:0043227//membrane-bounded organelle;GO:0005622//intracellular;GO:0044424//intracellular part;GO:0043226//organelle;GO:0005615//extracellular space;GO:0043231//intracellular membrane-bounded organelle;GO:1903561//extracellular vesicle;GO:0005634//nucle…	K09627//serine protease 23 [EC:3.4.21.-]
26357	0.33	1.17	1.82597	4.23178e-09	1.14369e-09	Abcg2	GO:0015711//organic anion transport;GO:0043279//response to alkaloid;GO:0044057//regulation of system process;GO:0071383//cellular response to steroid hormone stimulus;GO:0071495//cellular response to endogenous stimulus;GO:0009410//response to xenobiotic stimulus;GO:0009987//cellular process;GO:0006869//lipid transport;GO:0009719//response to endogenous stimulus;GO:1901135//carbohydrate derivati…	K05681//ATP-binding cassette, subfamily G (WHITE), member 2+ko01523//Antifolate resistance+ko04976//Bile secretion+ko02010//ABC transporters
72650	0.52	1.84	1.82312	6.14321e-11	1.43826e-11	2810006K23Rik	GO:0043604//amide biosynthetic process;GO:0019222//regulation of metabolic process;GO:0006412//translation;GO:1901566//organonitrogen compound biosynthetic process;GO:0044267//cellular protein metabolic process;GO:0031323//regulation of cellular metabolic process;GO:0051246//regulation of protein metabolic process;GO:0010608//posttranscriptional regulation of gene expression;GO:0044238//primary m…	K03462//nicotinamide phosphoribosyltransferase [EC:2.4.2.12]+ko00760//Nicotinate and nicotinamide metabolism+ko04621//NOD-like receptor signaling pathway+ko01100//Metabolic pathways;K02835//peptide chain release factor 1
320558	2.39	8.38	1.80994	4.79943e-140	7.38606e-142	Sycp2	GO:0009653//anatomical structure morphogenesis;GO:0048285//organelle fission;GO:0016043//cellular component organization;GO:0048519//negative regulation of biological process;GO:0061458//reproductive system development;GO:0050789//regulation of biological process;GO:0007275//multicellular organism development;GO:0048232//male gamete generation;GO:0043069//negative regulation of programmed cell de…	K19529//synaptonemal complex protein 2;K19529//synaptonemal complex protein 2;K19529//synaptonemal complex protein 2
12301	1.83	6.41	1.80848	1.27271e-43	8.30816e-45	Cacybp	GO:0048519//negative regulation of biological process;GO:0010556//regulation of macromolecule biosynthetic process;GO:0009725//response to hormone;GO:0010033//response to organic substance;GO:0010604//positive regulation of macromolecule metabolic process;GO:0031325//positive regulation of cellular metabolic process;GO:0019219//regulation of nucleobase-containing compound metabolic process;GO:003…	K04507//calcyclin binding protein+ko04310//Wnt signaling pathway
235956	1.07	3.74	1.80543	2.68332e-15	4.80814e-16	Zfp825	GO:0006355//regulation of transcription, DNA-templated;GO:0009889//regulation of biosynthetic process;GO:0050789//regulation of biological process;GO:0019222//regulation of metabolic process;GO:2000112//regulation of cellular macromolecule biosynthetic process;GO:0010468//regulation of gene expression;GO:0051252//regulation of RNA metabolic process;GO:0031323//regulation of cellular metabolic pro…	K09228//KRAB domain-containing zinc finger protein
319719	0.46	1.6	1.79837	1.58644e-20	2.2033e-21	Simc1	GO:0005488//binding;GO:0032184//SUMO polymer binding;GO:0032182//ubiquitin-like protein binding;GO:0005515//protein binding;GO:0032183//SUMO binding;	K03006//DNA-directed RNA polymerase II subunit RPB1 [EC:2.7.7.6]+ko00230//Purine metabolism+ko03020//RNA polymerase+ko00240//Pyrimidine metabolism+ko05016//Huntington's disease+ko01100//Metabolic pathways+ko05169//Epstein-Barr virus infection+ko05168//Herpes simplex infection;K03006//DNA-directed RNA polymerase II subunit RPB1 [EC:2.7.7.6]+ko00230//Purine metabolism+ko03020//RNA polymerase+ko0024…
94186	1.16	4.03	1.79666	3.81364e-48	2.2129e-49	Strn3	GO:0048523//negative regulation of cellular process;GO:0031325//positive regulation of cellular metabolic process;GO:0009966//regulation of signal transduction;GO:0045935//positive regulation of nucleobase-containing compound metabolic process;GO:0045892//negative regulation of transcription, DNA-templated;GO:1902679//negative regulation of RNA biosynthetic process;GO:2000112//regulation of cellu…	K17608//striatin 1/3/4+ko04013//MAPK signaling pathway - fly;K17608//striatin 1/3/4+ko04013//MAPK signaling pathway - fly;K17608//striatin 1/3/4+ko04013//MAPK signaling pathway - fly;K17608//striatin 1/3/4+ko04013//MAPK signaling pathway - fly
22759	14.15	49.11	1.79521	0	0	Zfp97	GO:0065007//biological regulation;GO:0010468//regulation of gene expression;GO:0051171//regulation of nitrogen compound metabolic process;GO:0051252//regulation of RNA metabolic process;GO:0006355//regulation of transcription, DNA-templated;GO:0010556//regulation of macromolecule biosynthetic process;GO:0080090//regulation of primary metabolic process;GO:0031323//regulation of cellular metabolic …	K09228//KRAB domain-containing zinc finger protein;K09228//KRAB domain-containing zinc finger protein;K09228//KRAB domain-containing zinc finger protein
270672	0.43	1.49	1.7929	1.27656e-21	1.69725e-22	Map3k15	GO:0043410//positive regulation of MAPK cascade;GO:0044093//positive regulation of molecular function;GO:0019222//regulation of metabolic process;GO:0010562//positive regulation of phosphorus metabolic process;GO:0010604//positive regulation of macromolecule metabolic process;GO:0032268//regulation of cellular protein metabolic process;GO:0043085//positive regulation of catalytic activity;GO:0009…	K13986//mitogen-activated protein kinase kinase kinase 15 [EC:2.7.11.25]
71306	0.39	1.35	1.79141	2.48242e-26	2.74468e-27	Mfap3l	GO:0005623//cell;GO:0016021//integral component of membrane;GO:0031224//intrinsic component of membrane;GO:0005622//intracellular;GO:0005634//nucleus;GO:0071944//cell periphery;GO:0043231//intracellular membrane-bounded organelle;GO:0044425//membrane part;GO:0005737//cytoplasm;GO:0005886//plasma membrane;GO:0043227//membrane-bounded organelle;GO:0016020//membrane;GO:0044424//intracellular part;GO…
BGI_novel_G000267	1.41	4.84	1.77931	5.59423e-18	8.82092e-19	BGI_novel_G000267		K17914//kinesin family member 13
54670	0.12	0.41	1.77259	1.22804e-09	3.17098e-10	Atp8b1	GO:0048519//negative regulation of biological process;GO:0006082//organic acid metabolic process;GO:0006629//lipid metabolic process;GO:1903506//regulation of nucleic acid-templated transcription;GO:0007423//sensory organ development;GO:0019222//regulation of metabolic process;GO:0071704//organic substance metabolic process;GO:0008206//bile acid metabolic process;GO:0031344//regulation of cell pr…	K01530//phospholipid-translocating ATPase [EC:3.6.3.1]
666731	0.46	1.57	1.77106	2.1571e-10	5.26928e-11	Trim43c	GO:0005622//intracellular;GO:0005623//cell;GO:0044464//cell part;GO:0046914//transition metal ion binding;GO:0043167//ion binding;GO:0005488//binding;GO:0043169//cation binding;GO:0008270//zinc ion binding;GO:0046872//metal ion binding;	K12019//tripartite motif-containing protein 43/48/49/64/77
28200	0.22	0.75	1.76939	0.000403572	0.000179756	Dhrs4	GO:0044238//primary metabolic process;GO:0016101//diterpenoid metabolic process;GO:0022607//cellular component assembly;GO:0071822//protein complex subunit organization;GO:0070271//protein complex biogenesis;GO:0042180//cellular ketone metabolic process;GO:0009987//cellular process;GO:0051262//protein tetramerization;GO:0051259//protein oligomerization;GO:0044237//cellular metabolic process;GO:00…	K11147//dehydrogenase/reductase SDR family member 4 [EC:1.1.-.-]+ko04146//Peroxisome+ko00830//Retinol metabolism+ko01100//Metabolic pathways;K11147//dehydrogenase/reductase SDR family member 4 [EC:1.1.-.-]+ko04146//Peroxisome+ko00830//Retinol metabolism+ko01100//Metabolic pathways
434865	1.09	3.71	1.76709	2.07728e-19	3.04878e-20	Luzp4		K14959//histone-lysine N-methyltransferase MLL4 [EC:2.1.1.43]+ko00310//Lysine degradation;K06824//nephronectin;K20364//multiple coagulation factor deficiency protein 2
12912	0.1	0.34	1.76553	6.06967e-09	1.66184e-09	Creb1	GO:0009636//response to toxic substance;GO:1990823//response to leukemia inhibitory factor;GO:0032501//multicellular organismal process;GO:0071560//cellular response to transforming growth factor beta stimulus;GO:0010942//positive regulation of cell death;GO:1903507//negative regulation of nucleic acid-templated transcription;GO:0010033//response to organic substance;GO:0045898//regulation of RNA…	K05870//cyclic AMP-responsive element-binding protein 1+ko04024//cAMP signaling pathway+ko04022//cGMP-PKG signaling pathway+ko04211//Longevity regulating pathway+ko04918//Thyroid hormone synthesis+ko04916//Melanogenesis+ko04915//Estrogen signaling pathway+ko04911//Insulin secretion+ko04380//Osteoclast differentiation+ko04728//Dopaminergic synapse+ko04725//Cholinergic synapse+ko05034//Alcoholism+k…
627814	0.34	1.15	1.75803	1.04185e-11	2.31106e-12	Vmn2r109	GO:0016021//integral component of membrane;GO:0071944//cell periphery;GO:0016020//membrane;GO:0005623//cell;GO:0044464//cell part;GO:0044425//membrane part;GO:0031224//intrinsic component of membrane;GO:0005886//plasma membrane;GO:0038023//signaling receptor activity;GO:0099600//transmembrane receptor activity;GO:0004871//signal transducer activity;GO:0004872//receptor activity;GO:0004930//G-prot…	K04613//vomeronasal 2 receptor;K04613//vomeronasal 2 receptor
12894	0.08	0.27	1.75489	8.5379e-05	3.47224e-05	Cpt1a	GO:0031323//regulation of cellular metabolic process;GO:0030855//epithelial cell differentiation;GO:0001676//long-chain fatty acid metabolic process;GO:0009893//positive regulation of metabolic process;GO:0006577//amino-acid betaine metabolic process;GO:0051223//regulation of protein transport;GO:0046320//regulation of fatty acid oxidation;GO:1903530//regulation of secretion by cell;GO:0050794//r…	K08765//carnitine O-palmitoyltransferase 1, liver isoform [EC:2.3.1.21]+ko03320//PPAR signaling pathway+ko04714//Thermogenesis+ko04931//Insulin resistance+ko04152//AMPK signaling pathway+ko01212//Fatty acid metabolism+ko00071//Fatty acid degradation+ko04922//Glucagon signaling pathway+ko04920//Adipocytokine signaling pathway
67974	0.49	1.65	1.75161	1.22275e-17	1.9527e-18	Ccny	GO:0019220//regulation of phosphate metabolic process;GO:0048522//positive regulation of cellular process;GO:0048583//regulation of response to stimulus;GO:0042325//regulation of phosphorylation;GO:0010646//regulation of cell communication;GO:0000278//mitotic cell cycle;GO:0051247//positive regulation of protein metabolic process;GO:0007049//cell cycle;GO:0045737//positive regulation of cyclin-de…	K18468//vacuolar protein sorting-associated protein 35+ko04144//Endocytosis;K12491//Arf-GAP with GTPase, ANK repeat and PH domain-containing protein 1/3+ko04144//Endocytosis;K18468//vacuolar protein sorting-associated protein 35+ko04144//Endocytosis;K12491//Arf-GAP with GTPase, ANK repeat and PH domain-containing protein 1/3+ko04144//Endocytosis;K18468//vacuolar protein sorting-associated protein…
71710	3.01	10.13	1.7508	5.19541e-143	7.73332e-145	Lrrcc1	GO:0007049//cell cycle;GO:0051301//cell division;GO:0009987//cellular process;GO:0044422//organelle part;GO:0015630//microtubule cytoskeleton;GO:0043226//organelle;GO:0005815//microtubule organizing center;GO:0044450//microtubule organizing center part;GO:0043232//intracellular non-membrane-bounded organelle;GO:0005814//centriole;GO:0044446//intracellular organelle part;GO:0043228//non-membrane-b…	K16475//leucine-rich repeat and coiled-coil domain-containing protein 1;K16475//leucine-rich repeat and coiled-coil domain-containing protein 1
69189	0.42	1.41	1.74723	1.31504e-05	4.83964e-06	Mcemp1	GO:0031224//intrinsic component of membrane;GO:0044425//membrane part;GO:0016020//membrane;GO:0016021//integral component of membrane;	K20280//trafficking protein particle complex subunit 5
268859	0.34	1.14	1.74543	5.64756e-14	1.08855e-14	Rbfox1	GO:0044238//primary metabolic process;GO:0044237//cellular metabolic process;GO:0048731//system development;GO:0045595//regulation of cell differentiation;GO:0000381//regulation of alternative mRNA splicing, via spliceosome;GO:1901360//organic cyclic compound metabolic process;GO:0090304//nucleic acid metabolic process;GO:0050885//neuromuscular process controlling balance;GO:0044260//cellular mac…	K14946//RNA binding protein fox-1
195555	0.2	0.67	1.74416	4.15379e-06	1.44931e-06	Pramef6	GO:2001141//regulation of RNA biosynthetic process;GO:0051172//negative regulation of nitrogen compound metabolic process;GO:0010941//regulation of cell death;GO:0045595//regulation of cell differentiation;GO:0031324//negative regulation of cellular metabolic process;GO:0043066//negative regulation of apoptotic process;GO:0050794//regulation of cellular process;GO:0031323//regulation of cellular …	K10308//F-box protein 31;K14284//nuclear RNA export factor+ko03013//RNA transport+ko03015//mRNA surveillance pathway+ko03008//Ribosome biogenesis in eukaryotes+ko05164//Influenza A+ko05168//Herpes simplex infection;K10308//F-box protein 31;K14284//nuclear RNA export factor+ko03013//RNA transport+ko03015//mRNA surveillance pathway+ko03008//Ribosome biogenesis in eukaryotes+ko05164//Influenza A+ko0…
67263	0.06	0.2	1.73697	0.000277087	0.000120429	Zswim6	GO:0022008//neurogenesis;GO:0030154//cell differentiation;GO:0045595//regulation of cell differentiation;GO:0120036//plasma membrane bounded cell projection organization;GO:0007399//nervous system development;GO:0048468//cell development;GO:0048699//generation of neurons;GO:0048666//neuron development;GO:0009987//cellular process;GO:0030182//neuron differentiation;GO:0007275//multicellular organi…	K01231//alpha-mannosidase II [EC:3.2.1.114]+ko00510//N-Glycan biosynthesis+ko01100//Metabolic pathways;K19475//WAS/WASL-interacting protein+ko04144//Endocytosis
269023	0.28	0.93	1.7318	1.78468e-14	3.34536e-15	Zfp608	GO:0009058//biosynthetic process;GO:1901576//organic substance biosynthetic process;GO:0050863//regulation of T cell activation;GO:2000113//negative regulation of cellular macromolecule biosynthetic process;GO:0051093//negative regulation of developmental process;GO:0051250//negative regulation of lymphocyte activation;GO:0048519//negative regulation of biological process;GO:1903038//negative reg…	K10847//DNA-repair protein complementing XP-A cells+ko03420//Nucleotide excision repair+ko01524//Platinum drug resistance
108686	0.42	1.39	1.72662	4.69453e-31	4.39104e-32	Ccdc88a	GO:0030032//lamellipodium assembly;GO:0051247//positive regulation of protein metabolic process;GO:0031323//regulation of cellular metabolic process;GO:0001932//regulation of protein phosphorylation;GO:0010604//positive regulation of macromolecule metabolic process;GO:0097435//supramolecular fiber organization;GO:0051246//regulation of protein metabolic process;GO:0120034//positive regulation of …	K20478//golgin subfamily B member 1;K06091//MAGUK p55 subfamily member 5+ko04391//Hippo signaling pathway - fly+ko04390//Hippo signaling pathway+ko04530//Tight junction+ko05165//Human papillomavirus infection;K16536//protein HOOK3;K20478//golgin subfamily B member 1
108058	0.13	0.43	1.72583	0.0001092	4.50506e-05	Camk2d	GO:0009628//response to abiotic stimulus;GO:0042391//regulation of membrane potential;GO:0048588//developmental cell growth;GO:0035556//intracellular signal transduction;GO:0060314//regulation of ryanodine-sensitive calcium-release channel activity;GO:0044238//primary metabolic process;GO:0060255//regulation of macromolecule metabolic process;GO:0071241//cellular response to inorganic substance;G…	K04515//calcium/calmodulin-dependent protein kinase (CaM kinase) II [EC:2.7.11.17]+ko04360//Axon guidance+ko04024//cAMP signaling pathway+ko04020//Calcium signaling pathway+ko04217//Necroptosis+ko04916//Melanogenesis+ko04912//GnRH signaling pathway+ko04911//Insulin secretion+ko04310//Wnt signaling pathway+ko04728//Dopaminergic synapse+ko04725//Cholinergic synapse+ko04720//Long-term potentiation+k…
21417	0.13	0.43	1.72583	2.03341e-07	6.2753e-08	Zeb1	GO:0002682//regulation of immune system process;GO:1901360//organic cyclic compound metabolic process;GO:0001654//eye development;GO:1902680//positive regulation of RNA biosynthetic process;GO:0006807//nitrogen compound metabolic process;GO:0022008//neurogenesis;GO:1902679//negative regulation of RNA biosynthetic process;GO:0007399//nervous system development;GO:0010629//negative regulation of ge…	K09299//zinc finger homeobox protein 1/2+ko05206//MicroRNAs in cancer
78177	0.13	0.43	1.72583	4.14118e-05	1.6152e-05	Ninl	GO:0043228//non-membrane-bounded organelle;GO:0044422//organelle part;GO:0044421//extracellular region part;GO:0045171//intercellular bridge;GO:0099513//polymeric cytoskeletal fiber;GO:0005829//cytosol;GO:0005622//intracellular;GO:0005856//cytoskeleton;GO:0005874//microtubule;GO:0044444//cytoplasmic part;GO:0099081//supramolecular polymer;GO:0044424//intracellular part;GO:0005576//extracellular r…	K16477//ninein-like protein;K16477//ninein-like protein;K16477//ninein-like protein;K16477//ninein-like protein;K16477//ninein-like protein;K16477//ninein-like protein;K16477//ninein-like protein;K16477//ninein-like protein;K16477//ninein-like protein
108797	0.1	0.33	1.72247	0.000188411	7.98802e-05	Mex3b	GO:0050789//regulation of biological process;GO:0022409//positive regulation of cell-cell adhesion;GO:0051179//localization;GO:0065007//biological regulation;GO:0065009//regulation of molecular function;GO:0043085//positive regulation of catalytic activity;GO:0060627//regulation of vesicle-mediated transport;GO:0045807//positive regulation of endocytosis;GO:0070727//cellular macromolecule localiz…	K15686//RNA-binding protein MEX3 [EC:2.3.2.27]
17389	0.1	0.33	1.72247	1.01044e-13	1.97436e-14	Mmp16	GO:0006807//nitrogen compound metabolic process;GO:0009056//catabolic process;GO:0060348//bone development;GO:0048568//embryonic organ development;GO:0008152//metabolic process;GO:0032501//multicellular organismal process;GO:0051604//protein maturation;GO:1901564//organonitrogen compound metabolic process;GO:0006508//proteolysis;GO:0097094//craniofacial suture morphogenesis;GO:0030574//collagen c…	K07996//matrix metalloproteinase-16 (membrane-inserted) [EC:3.4.24.-]+ko05206//MicroRNAs in cancer+ko04928//Parathyroid hormone synthesis, secretion and action;K07996//matrix metalloproteinase-16 (membrane-inserted) [EC:3.4.24.-]+ko05206//MicroRNAs in cancer+ko04928//Parathyroid hormone synthesis, secretion and action
224065	0.99	3.26	1.71937	6.69019e-09	1.83891e-09	Uts2b	GO:0097746//regulation of blood vessel diameter;GO:0032501//multicellular organismal process;GO:0050880//regulation of blood vessel size;GO:0090066//regulation of anatomical structure size;GO:0065007//biological regulation;GO:0035150//regulation of tube size;GO:0008217//regulation of blood pressure;GO:0003013//circulatory system process;GO:0003008//system process;GO:0008015//blood circulation;GO:…	K05248//urotensin 2;K05248//urotensin 2
233246	0.07	0.23	1.71621	2.91561e-06	1.00111e-06	Ano5	GO:0006811//ion transport;GO:0006821//chloride transport;GO:0015698//inorganic anion transport;GO:0006810//transport;GO:0051234//establishment of localization;GO:0006820//anion transport;GO:0051179//localization;GO:0016020//membrane;GO:0044424//intracellular part;GO:0044432//endoplasmic reticulum part;GO:0044422//organelle part;GO:0031224//intrinsic component of membrane;GO:0098827//endoplasmic r…	K19480//anoctamin-5;K19480//anoctamin-5
71982	0.28	0.92	1.71621	3.55064e-07	1.11815e-07	Snx10	GO:0015031//protein transport;GO:0007275//multicellular organism development;GO:0009987//cellular process;GO:0002573//myeloid leukocyte differentiation;GO:0002376//immune system process;GO:0071705//nitrogen compound transport;GO:0071702//organic substance transport;GO:0006996//organelle organization;GO:0042221//response to chemical;GO:0015833//peptide transport;GO:0050896//response to stimulus;GO…	K17924//sorting nexin-10/11;K14306//nuclear pore complex protein Nup62+ko03013//RNA transport;K06840//semaphorin 3+ko04360//Axon guidance
18754	0.36	1.18	1.71272	4.31555e-20	6.12696e-21	Prkce	GO:0019222//regulation of metabolic process;GO:0010817//regulation of hormone levels;GO:0006873//cellular ion homeostasis;GO:0043254//regulation of protein complex assembly;GO:0055065//metal ion homeostasis;GO:0060359//response to ammonium ion;GO:0072507//divalent inorganic cation homeostasis;GO:0050804//modulation of chemical synaptic transmission;GO:0080134//regulation of response to stress;GO:…	K18050//novel protein kinase C epsilon type [EC:2.7.11.13]+ko04022//cGMP-PKG signaling pathway+ko04933//AGE-RAGE signaling pathway in diabetic complications+ko04071//Sphingolipid signaling pathway+ko04666//Fc gamma R-mediated phagocytosis+ko04530//Tight junction+ko04750//Inflammatory mediator regulation of TRP channels+ko05206//MicroRNAs in cancer+ko04371//Apelin signaling pathway+ko04931//Insuli…
667823	0.22	0.72	1.71049	4.02098e-14	7.68438e-15	Trim5	GO:0043412//macromolecule modification;GO:0008152//metabolic process;GO:0044267//cellular protein metabolic process;GO:0032101//regulation of response to external stimulus;GO:0032446//protein modification by small protein conjugation;GO:0048518//positive regulation of biological process;GO:0050776//regulation of immune response;GO:0000209//protein polyubiquitination;GO:0043410//positive regulatio…	K10648//tripartite motif-containing protein 5 [EC:2.3.2.27];K10648//tripartite motif-containing protein 5 [EC:2.3.2.27];K10648//tripartite motif-containing protein 5 [EC:2.3.2.27]
320111	0.35	1.14	1.70361	3.49935e-12	7.53502e-13	Prr18		K02184//formin 2+ko04320//Dorso-ventral axis formation;K10367//formin 1;K19475//WAS/WASL-interacting protein+ko04144//Endocytosis
16975	0.04	0.13	1.70044	0.000587321	0.000267786	Lrp8	GO:2000112//regulation of cellular macromolecule biosynthetic process;GO:0016043//cellular component organization;GO:0061097//regulation of protein tyrosine kinase activity;GO:0010646//regulation of cell communication;GO:0051128//regulation of cellular component organization;GO:0099175//regulation of postsynapse organization;GO:0032793//positive regulation of CREB transcription factor activity;GO…	K20052//low-density lipoprotein receptor-related protein 8
212281	0.33	1.06	1.68353	1.32766e-16	2.23328e-17	Zfp729a	GO:0009889//regulation of biosynthetic process;GO:0019219//regulation of nucleobase-containing compound metabolic process;GO:1903506//regulation of nucleic acid-templated transcription;GO:0051171//regulation of nitrogen compound metabolic process;GO:0019222//regulation of metabolic process;GO:0010556//regulation of macromolecule biosynthetic process;GO:2000112//regulation of cellular macromolecul…	K09228//KRAB domain-containing zinc finger protein
BGI_novel_G000743	0.67	2.15	1.6821	8.83587e-05	3.59732e-05	BGI_novel_G000743	GO:0005622//intracellular;GO:0043226//organelle;GO:0005634//nucleus;GO:0044422//organelle part;GO:0005694//chromosome;GO:0043227//membrane-bounded organelle;GO:0043232//intracellular non-membrane-bounded organelle;GO:0044815//DNA packaging complex;GO:0032993//protein-DNA complex;GO:0044464//cell part;GO:0044424//intracellular part;GO:0044427//chromosomal part;GO:0032991//macromolecular complex;GO…	K11253//histone H3+ko05322//Systemic lupus erythematosus+ko05034//Alcoholism+ko05202//Transcriptional misregulation in cancer
67040	0.39	1.25	1.68038	8.19165e-14	1.59131e-14	Ddx17	GO:0000380//alternative mRNA splicing, via spliceosome;GO:0048869//cellular developmental process;GO:0006139//nucleobase-containing compound metabolic process;GO:0071396//cellular response to lipid;GO:0031323//regulation of cellular metabolic process;GO:0016072//rRNA metabolic process;GO:0023052//signaling;GO:0048856//anatomical structure development;GO:0009755//hormone-mediated signaling pathway…	K13178//ATP-dependent RNA helicase DDX17 [EC:3.6.4.13];K13178//ATP-dependent RNA helicase DDX17 [EC:3.6.4.13];K13178//ATP-dependent RNA helicase DDX17 [EC:3.6.4.13];K13178//ATP-dependent RNA helicase DDX17 [EC:3.6.4.13]
70155	0.6	1.92	1.67807	2.91773e-28	2.99962e-29	Ogfrl1	GO:0016020//membrane;GO:0060089//molecular transducer activity;GO:0004872//receptor activity;	K13171//serine/arginine repetitive matrix protein 1+ko03013//RNA transport+ko03015//mRNA surveillance pathway
66601	1.11	3.54	1.67319	1.82179e-11	4.11238e-12	Tmigd1	GO:0042127//regulation of cell proliferation;GO:0090559//regulation of membrane permeability;GO:0032879//regulation of localization;GO:0010941//regulation of cell death;GO:0060548//negative regulation of cell death;GO:2000145//regulation of cell motility;GO:0043066//negative regulation of apoptotic process;GO:0065008//regulation of biological quality;GO:0042981//regulation of apoptotic process;GO…	K17341//hemicentin;K06767//Down syndrome cell adhesion molecule;K22653//neuroplastin
BGI_novel_G000059	0.78	2.48	1.66879	2.18357e-09	5.7471e-10	BGI_novel_G000059	GO:0044087//regulation of cellular component biogenesis;GO:0061003//positive regulation of dendritic spine morphogenesis;GO:0051960//regulation of nervous system development;GO:0032502//developmental process;GO:0065008//regulation of biological quality;GO:0007399//nervous system development;GO:0031346//positive regulation of cell projection organization;GO:0045666//positive regulation of neuron d…	K19528//synaptonemal complex protein 3+ko03440//Homologous recombination
68140	0.9	2.84	1.65789	3.89558e-25	4.49878e-26	Tigd2	GO:0043227//membrane-bounded organelle;GO:0044464//cell part;GO:0043226//organelle;GO:0043231//intracellular membrane-bounded organelle;GO:0044424//intracellular part;GO:0043229//intracellular organelle;GO:0005622//intracellular;GO:0005623//cell;GO:0005634//nucleus;GO:0003677//DNA binding;GO:0097159//organic cyclic compound binding;GO:0005488//binding;GO:0003676//nucleic acid binding;GO:1901363//…	K09228//KRAB domain-containing zinc finger protein;K09229//KRAB and SCAN domains-containing zinc finger protein;K19326//nesprin-1;K05164//interleukin 17 receptor A+ko04657//IL-17 signaling pathway+ko04060//Cytokine-cytokine receptor interaction
71508	0.93	2.92	1.65067	2.31972e-21	3.12222e-22	Zfp935	GO:0065007//biological regulation;GO:2001141//regulation of RNA biosynthetic process;GO:0010556//regulation of macromolecule biosynthetic process;GO:0080090//regulation of primary metabolic process;GO:2000112//regulation of cellular macromolecule biosynthetic process;GO:0006355//regulation of transcription, DNA-templated;GO:0010468//regulation of gene expression;GO:1903506//regulation of nucleic …	K09228//KRAB domain-containing zinc finger protein
381314	0.22	0.69	1.64909	6.56371e-08	1.9449e-08	Iars2	GO:0043436//oxoacid metabolic process;GO:0009059//macromolecule biosynthetic process;GO:0019752//carboxylic acid metabolic process;GO:1901564//organonitrogen compound metabolic process;GO:0006082//organic acid metabolic process;GO:0016070//RNA metabolic process;GO:0090304//nucleic acid metabolic process;GO:0006520//cellular amino acid metabolic process;GO:0043604//amide biosynthetic process;GO:00…	K01870//isoleucyl-tRNA synthetase [EC:6.1.1.5]+ko00970//Aminoacyl-tRNA biosynthesis
77573	0.37	1.16	1.64853	1.11533e-13	2.18774e-14	Vps33a	GO:0015833//peptide transport;GO:0022411//cellular component disassembly;GO:0042592//homeostatic process;GO:0030099//myeloid cell differentiation;GO:0097352//autophagosome maturation;GO:0051648//vesicle localization;GO:0044237//cellular metabolic process;GO:0048070//regulation of developmental pigmentation;GO:0007040//lysosome organization;GO:0009987//cellular process;GO:0006914//autophagy;GO:003…	K20182//vacuolar protein sorting-associated protein 33
BGI_novel_G000089	2.43	7.6	1.64504	1.95735e-27	2.07648e-28	BGI_novel_G000089	GO:0048513//animal organ development;GO:0030097//hemopoiesis;GO:0019222//regulation of metabolic process;GO:0009889//regulation of biosynthetic process;GO:0030154//cell differentiation;GO:0007275//multicellular organism development;GO:0006355//regulation of transcription, DNA-templated;GO:0051171//regulation of nitrogen compound metabolic process;GO:0002520//immune system development;GO:0065007//…	K09228//KRAB domain-containing zinc finger protein
75469	0.75	2.33	1.63537	4.11211e-05	1.60309e-05	Spata19	GO:0032501//multicellular organismal process;GO:0022414//reproductive process;GO:0032502//developmental process;GO:0007283//spermatogenesis;GO:0044703//multi-organism reproductive process;GO:0048609//multicellular organismal reproductive process;GO:0030154//cell differentiation;GO:0048232//male gamete generation;GO:0032504//multicellular organism reproduction;GO:0019953//sexual reproduction;GO:00…
69126	17.6	54.6	1.63333	2.21552e-56	1.08436e-57	1810022K09Rik
64010	0.35	1.08	1.6256	1.43108e-08	4.04548e-09	Sav1	GO:0044093//positive regulation of molecular function;GO:0060044//negative regulation of cardiac muscle cell proliferation;GO:0008544//epidermis development;GO:0048635//negative regulation of muscle organ development;GO:0055022//negative regulation of cardiac muscle tissue growth;GO:0048565//digestive tract development;GO:0061117//negative regulation of heart growth;GO:0050678//regulation of epit…	K16686//scaffold protein salvador+ko04391//Hippo signaling pathway - fly+ko04390//Hippo signaling pathway+ko04392//Hippo signaling pathway - multiple species+ko04214//Apoptosis - fly
218442	0.24	0.74	1.62449	5.13444e-12	1.11562e-12	Serinc5	GO:0006950//response to stress;GO:0006793//phosphorus metabolic process;GO:0048731//system development;GO:0098542//defense response to other organism;GO:0032502//developmental process;GO:0009597//detection of virus;GO:0006644//phospholipid metabolic process;GO:0042552//myelination;GO:0046486//glycerolipid metabolic process;GO:0045087//innate immune response;GO:0050896//response to stimulus;GO:005…	K09291//nucleoprotein TPR+ko05216//Thyroid cancer+ko03013//RNA transport+ko05200//Pathways in cancer
70897	0.87	2.68	1.62315	3.52757e-11	8.11864e-12	Fam71d	GO:0005623//cell;GO:0005622//intracellular;GO:0005634//nucleus;GO:0043231//intracellular membrane-bounded organelle;GO:0044424//intracellular part;GO:0043226//organelle;GO:0043229//intracellular organelle;GO:0043227//membrane-bounded organelle;GO:0044464//cell part;
433804	0.14	0.43	1.61891	0.000273941	0.000118958	Gm13154	GO:0050789//regulation of biological process;GO:0031326//regulation of cellular biosynthetic process;GO:1903506//regulation of nucleic acid-templated transcription;GO:0009889//regulation of biosynthetic process;GO:0031323//regulation of cellular metabolic process;GO:0019222//regulation of metabolic process;GO:0051171//regulation of nitrogen compound metabolic process;GO:0050794//regulation of cel…	K09228//KRAB domain-containing zinc finger protein
76577	1.09	3.34	1.61552	2.97182e-20	4.18548e-21	Faf2	GO:0042221//response to chemical;GO:0051649//establishment of localization in cell;GO:0009056//catabolic process;GO:0070727//cellular macromolecule localization;GO:0006807//nitrogen compound metabolic process;GO:0044257//cellular protein catabolic process;GO:0071705//nitrogen compound transport;GO:0019941//modification-dependent protein catabolic process;GO:0051641//cellular localization;GO:00428…	K18726//FAS-associated factor 2;K18726//FAS-associated factor 2
14453	0.16	0.49	1.61471	0.000813625	0.00037846	Gas2	GO:0050789//regulation of biological process;GO:0048523//negative regulation of cellular process;GO:0051128//regulation of cellular component organization;GO:0065008//regulation of biological quality;GO:0022604//regulation of cell morphogenesis;GO:0048519//negative regulation of biological process;GO:0008360//regulation of cell shape;GO:0050793//regulation of developmental process;GO:0022603//reg…	K13209//RNA-binding protein EWS+ko05202//Transcriptional misregulation in cancer;K19827//microtuble-actin crosslinking factor 1;K13209//RNA-binding protein EWS+ko05202//Transcriptional misregulation in cancer;K19827//microtuble-actin crosslinking factor 1;K10382//dystonin
70789	0.17	0.52	1.61298	1.93229e-05	7.2429e-06	Kynu	GO:0046395//carboxylic acid catabolic process;GO:0019441//tryptophan catabolic process to kynurenine;GO:0035383//thioester metabolic process;GO:0006082//organic acid metabolic process;GO:0019674//NAD metabolic process;GO:0009063//cellular amino acid catabolic process;GO:0006139//nucleobase-containing compound metabolic process;GO:0007584//response to nutrient;GO:0018130//heterocycle biosynthetic …	K01556//kynureninase [EC:3.7.1.3]+ko00380//Tryptophan metabolism+ko01100//Metabolic pathways;K01556//kynureninase [EC:3.7.1.3]+ko00380//Tryptophan metabolism+ko01100//Metabolic pathways
BGI_novel_G000590	0.52	1.59	1.61244	9.44102e-08	2.83558e-08	BGI_novel_G000590	GO:0016021//integral component of membrane;GO:0016020//membrane;GO:0044425//membrane part;GO:0031224//intrinsic component of membrane;
100041433	1.36	4.09	1.58849	9.84738e-34	8.47788e-35	Gm13247	GO:0010604//positive regulation of macromolecule metabolic process;GO:0045944//positive regulation of transcription from RNA polymerase II promoter;GO:0010628//positive regulation of gene expression;GO:0009987//cellular process;GO:0010556//regulation of macromolecule biosynthetic process;GO:0031323//regulation of cellular metabolic process;GO:0030154//cell differentiation;GO:0048534//hematopoieti…	K09228//KRAB domain-containing zinc finger protein;K09228//KRAB domain-containing zinc finger protein
68810	43.15	129.59	1.58652	0	0	Nexn	GO:0048739//cardiac muscle fiber development;GO:0048738//cardiac muscle tissue development;GO:0048731//system development;GO:0048513//animal organ development;GO:0060537//muscle tissue development;GO:0042692//muscle cell differentiation;GO:0051146//striated muscle cell differentiation;GO:0009888//tissue development;GO:0055013//cardiac muscle cell development;GO:0051493//regulation of cytoskeleton…	K18626//trichohyalin;K00476//aspartate beta-hydroxylase [EC:1.14.11.16]
110957	0.12	0.36	1.58496	0.000568186	0.000258452	D1Pas1	GO:1901576//organic substance biosynthetic process;GO:0019222//regulation of metabolic process;GO:0044260//cellular macromolecule metabolic process;GO:0022414//reproductive process;GO:0090304//nucleic acid metabolic process;GO:0044271//cellular nitrogen compound biosynthetic process;GO:0000003//reproduction;GO:0043604//amide biosynthetic process;GO:0006518//peptide metabolic process;GO:0019538//p…	K11594//ATP-dependent RNA helicase DDX3X [EC:3.6.4.13]+ko04622//RIG-I-like receptor signaling pathway+ko05203//Viral carcinogenesis+ko05161//Hepatitis B
12287	0.02	0.06	1.58496	0.000735894	0.000340586	Cacna1b	GO:0051239//regulation of multicellular organismal process;GO:0099643//signal release from synapse;GO:0086010//membrane depolarization during action potential;GO:0070588//calcium ion transmembrane transport;GO:0098916//anterograde trans-synaptic signaling;GO:0055085//transmembrane transport;GO:0023052//signaling;GO:0051234//establishment of localization;GO:0030001//metal ion transport;GO:0006836/…	K04849//voltage-dependent calcium channel N type alpha-1B+ko04020//Calcium signaling pathway+ko04728//Dopaminergic synapse+ko04725//Cholinergic synapse+ko04726//Serotonergic synapse+ko04727//GABAergic synapse+ko04721//Synaptic vesicle cycle+ko04723//Retrograde endocannabinoid signaling+ko05033//Nicotine addiction+ko05032//Morphine addiction+ko04930//Type II diabetes mellitus+ko04010//MAPK signali…
15260	0.08	0.24	1.58496	0.000165674	6.97284e-05	Hira	GO:0019438//aromatic compound biosynthetic process;GO:0006334//nucleosome assembly;GO:0019219//regulation of nucleobase-containing compound metabolic process;GO:0032502//developmental process;GO:0050789//regulation of biological process;GO:0007369//gastrulation;GO:0031323//regulation of cellular metabolic process;GO:0006725//cellular aromatic compound metabolic process;GO:0016569//covalent chroma…	K11293//protein HIRA/HIR1;K11293//protein HIRA/HIR1
16993	0.22	0.66	1.58496	0.000126148	5.24004e-05	Lta4h	GO:0044238//primary metabolic process;GO:0006691//leukotriene metabolic process;GO:0034641//cellular nitrogen compound metabolic process;GO:0046456//icosanoid biosynthetic process;GO:0044283//small molecule biosynthetic process;GO:0043603//cellular amide metabolic process;GO:0044281//small molecule metabolic process;GO:1901575//organic substance catabolic process;GO:0071704//organic substance met…	K01254//leukotriene-A4 hydrolase [EC:3.3.2.6]+ko00590//Arachidonic acid metabolism+ko01100//Metabolic pathways;K01254//leukotriene-A4 hydrolase [EC:3.3.2.6]+ko00590//Arachidonic acid metabolism+ko01100//Metabolic pathways
319481	0.15	0.45	1.58496	2.90493e-07	9.07116e-08	Wdr59	GO:1902531//regulation of intracellular signal transduction;GO:0050896//response to stimulus;GO:0009991//response to extracellular stimulus;GO:0006950//response to stress;GO:0009987//cellular process;GO:0071496//cellular response to external stimulus;GO:0050789//regulation of biological process;GO:0009605//response to external stimulus;GO:0007154//cell communication;GO:0010646//regulation of cell…	K20409//WD repeat-containing protein 59+ko04150//mTOR signaling pathway;K20409//WD repeat-containing protein 59+ko04150//mTOR signaling pathway;K20409//WD repeat-containing protein 59+ko04150//mTOR signaling pathway;K20409//WD repeat-containing protein 59+ko04150//mTOR signaling pathway
50706	0.39	1.17	1.58496	9.92508e-11	2.36374e-11	Postn	GO:2000147//positive regulation of cell motility;GO:0032989//cellular component morphogenesis;GO:0060560//developmental growth involved in morphogenesis;GO:1903530//regulation of secretion by cell;GO:0048699//generation of neurons;GO:0022603//regulation of anatomical structure morphogenesis;GO:0071496//cellular response to external stimulus;GO:0007155//cell adhesion;GO:1990138//neuron projection …	K19519//transforming growth factor-beta-induced protein;K19519//transforming growth factor-beta-induced protein
78890	0.16	0.48	1.58496	8.6194e-06	3.0982e-06	Trmt44	GO:0006139//nucleobase-containing compound metabolic process;GO:0030488//tRNA methylation;GO:0043412//macromolecule modification;GO:0006807//nitrogen compound metabolic process;GO:0046483//heterocycle metabolic process;GO:0090304//nucleic acid metabolic process;GO:0034470//ncRNA processing;GO:0006396//RNA processing;GO:0009987//cellular process;GO:0043414//macromolecule methylation;GO:0044237//ce…	K15447//tRNASer (uridine44-2'-O)-methyltransferase [EC:2.1.1.211];K15447//tRNASer (uridine44-2'-O)-methyltransferase [EC:2.1.1.211]
382243	0.35	1.04	1.57116	6.11406e-06	2.16566e-06	Gm10439		K20093//DNA excision repair protein ERCC-6-like [EC:3.6.4.12];K06824//nephronectin
66435	0.32	0.95	1.56986	2.30964e-21	3.1072e-22	Uggt2	GO:0050896//response to stimulus;GO:0043413//macromolecule glycosylation;GO:1901564//organonitrogen compound metabolic process;GO:0044257//cellular protein catabolic process;GO:0018279//protein N-linked glycosylation via asparagine;GO:0043412//macromolecule modification;GO:0030968//endoplasmic reticulum unfolded protein response;GO:1901137//carbohydrate derivative biosynthetic process;GO:0006950/…	K11718//UDP-glucose:glycoprotein glucosyltransferase [EC:2.4.1.-]+ko04141//Protein processing in endoplasmic reticulum;K11718//UDP-glucose:glycoprotein glucosyltransferase [EC:2.4.1.-]+ko04141//Protein processing in endoplasmic reticulum;K11718//UDP-glucose:glycoprotein glucosyltransferase [EC:2.4.1.-]+ko04141//Protein processing in endoplasmic reticulum;K11718//UDP-glucose:glycoprotein glucosylt…
228005	6.9	20.35	1.56036	0	0	Ppig	GO:0009987//cellular process;GO:0006457//protein folding;GO:0043227//membrane-bounded organelle;GO:0005634//nucleus;GO:0043226//organelle;GO:0005654//nucleoplasm;GO:0005623//cell;GO:0044464//cell part;GO:0031974//membrane-enclosed lumen;GO:0043229//intracellular organelle;GO:0044451//nucleoplasm part;GO:0044424//intracellular part;GO:0016363//nuclear matrix;GO:0005829//cytosol;GO:0016604//nuclear…	K09566//peptidyl-prolyl isomerase G (cyclophilin G) [EC:5.2.1.8]
333883	0.38	1.12	1.55943	3.82454e-05	1.48664e-05	Cd59b	GO:0050789//regulation of biological process;GO:0031324//negative regulation of cellular metabolic process;GO:0030162//regulation of proteolysis;GO:0010468//regulation of gene expression;GO:0002698//negative regulation of immune effector process;GO:0009892//negative regulation of metabolic process;GO:0010955//negative regulation of protein processing;GO:0002697//regulation of immune effector proc…	K04008//CD59 antigen+ko04640//Hematopoietic cell lineage+ko04610//Complement and coagulation cascades
19877	47.37	139.12	1.55428	0	0	Rock1	GO:0032956//regulation of actin cytoskeleton organization;GO:0045785//positive regulation of cell adhesion;GO:0016525//negative regulation of angiogenesis;GO:0010605//negative regulation of macromolecule metabolic process;GO:0030048//actin filament-based movement;GO:0032060//bleb assembly;GO:0051451//myoblast migration;GO:0007155//cell adhesion;GO:0050901//leukocyte tethering or rolling;GO:004352…	K04514//Rho-associated protein kinase 1 [EC:2.7.11.1]+ko04360//Axon guidance+ko04024//cAMP signaling pathway+ko04022//cGMP-PKG signaling pathway+ko05132//Salmonella infection+ko05130//Pathogenic Escherichia coli infection+ko05131//Shigellosis+ko04350//TGF-beta signaling pathway+ko04810//Regulation of actin cytoskeleton+ko04510//Focal adhesion+ko04071//Sphingolipid signaling pathway+ko04611//Plate…
72713	0.26	0.76	1.54749	2.67436e-05	1.02049e-05	Angptl1	GO:0065007//biological regulation;GO:0007165//signal transduction;GO:0007167//enzyme linked receptor protein signaling pathway;GO:0050794//regulation of cellular process;GO:0051716//cellular response to stimulus;GO:0050789//regulation of biological process;GO:0007169//transmembrane receptor protein tyrosine kinase signaling pathway;GO:0050896//response to stimulus;GO:0023052//signaling;GO:0009987…	K05466//angiopoietin 2+ko04151//PI3K-Akt signaling pathway+ko04010//MAPK signaling pathway+ko04014//Ras signaling pathway+ko04015//Rap1 signaling pathway+ko04066//HIF-1 signaling pathway+ko05167//Kaposi's sarcoma-associated herpesvirus infection;K05467//angiopoietin 4+ko04151//PI3K-Akt signaling pathway+ko04010//MAPK signaling pathway+ko04014//Ras signaling pathway+ko04015//Rap1 signaling pathway…
76390	10.43	30.41	1.54381	3.09679e-296	1.81647e-298	Zfp735	GO:0010468//regulation of gene expression;GO:1903506//regulation of nucleic acid-templated transcription;GO:2000112//regulation of cellular macromolecule biosynthetic process;GO:0031323//regulation of cellular metabolic process;GO:0006355//regulation of transcription, DNA-templated;GO:0050794//regulation of cellular process;GO:0010556//regulation of macromolecule biosynthetic process;GO:0050789//…	K09228//KRAB domain-containing zinc finger protein
209387	0.7	2.04	1.54314	2.47991e-19	3.65378e-20	Trim30d	GO:0023051//regulation of signaling;GO:0009987//cellular process;GO:0051252//regulation of RNA metabolic process;GO:0034122//negative regulation of toll-like receptor signaling pathway;GO:0034641//cellular nitrogen compound metabolic process;GO:0009607//response to biotic stimulus;GO:0009615//response to virus;GO:0044267//cellular protein metabolic process;GO:0060255//regulation of macromolecule …	K10648//tripartite motif-containing protein 5 [EC:2.3.2.27];K10648//tripartite motif-containing protein 5 [EC:2.3.2.27];K10648//tripartite motif-containing protein 5 [EC:2.3.2.27]
19726	0.11	0.32	1.54057	7.10159e-08	2.11368e-08	Rfx3	GO:0010628//positive regulation of gene expression;GO:1901576//organic substance biosynthetic process;GO:0031323//regulation of cellular metabolic process;GO:2000078//positive regulation of type B pancreatic cell development;GO:0003309//type B pancreatic cell differentiation;GO:0009059//macromolecule biosynthetic process;GO:0030031//cell projection assembly;GO:2001141//regulation of RNA biosynthe…	K09173//regulatory factor X 1/2/3;K09173//regulatory factor X 1/2/3;K09173//regulatory factor X 1/2/3;K09173//regulatory factor X 1/2/3;K09173//regulatory factor X 1/2/3;K09173//regulatory factor X 1/2/3;K09173//regulatory factor X 1/2/3;K09173//regulatory factor X 1/2/3;K09173//regulatory factor X 1/2/3;K09173//regulatory factor X 1/2/3;K09173//regulatory factor X 1/2/3
240613	0.17	0.49	1.52725	1.1273e-13	2.21266e-14	9930021J03Rik		K15713//E3 ubiquitin-protein ligase UHRF2 [EC:2.3.2.27];K21125//mucin-5AC+ko04657//IL-17 signaling pathway;K21125//mucin-5AC+ko04657//IL-17 signaling pathway;K21125//mucin-5AC+ko04657//IL-17 signaling pathway;K15713//E3 ubiquitin-protein ligase UHRF2 [EC:2.3.2.27];K21125//mucin-5AC+ko04657//IL-17 signaling pathway;K21125//mucin-5AC+ko04657//IL-17 signaling pathway;K20222//importin-5;K20222//impor…
102639021	0.61	1.74	1.51221	1.1454e-05	4.18064e-06	LOC102639021	GO:0065007//biological regulation;GO:0006355//regulation of transcription, DNA-templated;GO:0019222//regulation of metabolic process;GO:0050789//regulation of biological process;GO:2001141//regulation of RNA biosynthetic process;GO:0051252//regulation of RNA metabolic process;GO:0080090//regulation of primary metabolic process;GO:0010556//regulation of macromolecule biosynthetic process;GO:003132…	K09228//KRAB domain-containing zinc finger protein
319236	0.31	0.88	1.50524	1.03154e-10	2.458e-11	Trim12c	GO:0009893//positive regulation of metabolic process;GO:0050794//regulation of cellular process;GO:1903506//regulation of nucleic acid-templated transcription;GO:0019538//protein metabolic process;GO:1901564//organonitrogen compound metabolic process;GO:0009615//response to virus;GO:0002253//activation of immune response;GO:1903901//negative regulation of viral life cycle;GO:0019220//regulation o…	K10648//tripartite motif-containing protein 5 [EC:2.3.2.27];K10648//tripartite motif-containing protein 5 [EC:2.3.2.27];K10648//tripartite motif-containing protein 5 [EC:2.3.2.27]
100041979	2.29	6.48	1.50065	3.81026e-41	2.65312e-42	Gm3604	GO:0031326//regulation of cellular biosynthetic process;GO:0031323//regulation of cellular metabolic process;GO:0050789//regulation of biological process;GO:0010468//regulation of gene expression;GO:0009889//regulation of biosynthetic process;GO:0006355//regulation of transcription, DNA-templated;GO:0051252//regulation of RNA metabolic process;GO:2001141//regulation of RNA biosynthetic process;GO…	K09228//KRAB domain-containing zinc finger protein
70190	3.75	10.58	1.49638	4.51461e-72	1.63728e-73	2610036A22Rik	GO:1903508//positive regulation of nucleic acid-templated transcription;GO:0006357//regulation of transcription from RNA polymerase II promoter;GO:0060255//regulation of macromolecule metabolic process;GO:0051171//regulation of nitrogen compound metabolic process;GO:0050789//regulation of biological process;GO:0065007//biological regulation;GO:0045893//positive regulation of transcription, DNA-te…	K09228//KRAB domain-containing zinc finger protein;K09228//KRAB domain-containing zinc finger protein
207227	1.54	4.34	1.49476	1.40031e-29	1.37602e-30	Stxbp5l	GO:0010648//negative regulation of cell communication;GO:0050714//positive regulation of protein secretion;GO:0033036//macromolecule localization;GO:0008104//protein localization;GO:1903532//positive regulation of secretion by cell;GO:0051049//regulation of transport;GO:0050708//regulation of protein secretion;GO:0051223//regulation of protein transport;GO:0051050//positive regulation of transpor…	K08518//syntaxin-binding protein 5;K08518//syntaxin-binding protein 5;K08518//syntaxin-binding protein 5
73610	2.58	7.26	1.4926	8.9044e-41	6.23954e-42	Zfp433	GO:0065007//biological regulation;GO:2001141//regulation of RNA biosynthetic process;GO:0050794//regulation of cellular process;GO:0019219//regulation of nucleobase-containing compound metabolic process;GO:0051252//regulation of RNA metabolic process;GO:0080090//regulation of primary metabolic process;GO:0010556//regulation of macromolecule biosynthetic process;GO:0019222//regulation of metabolic…	K09228//KRAB domain-containing zinc finger protein
27416	0.75	2.1	1.48543	2.55082e-12	5.47006e-13	Abcc5	GO:0051179//localization;GO:0006810//transport;GO:0055085//transmembrane transport;GO:0051234//establishment of localization;GO:0016020//membrane;GO:0044425//membrane part;GO:0005886//plasma membrane;GO:0031226//intrinsic component of plasma membrane;GO:0031224//intrinsic component of membrane;GO:0016021//integral component of membrane;GO:0044459//plasma membrane part;GO:0071944//cell periphery;G…	K05668//ATP-binding cassette, subfamily C (CFTR/MRP), member 5+ko01523//Antifolate resistance+ko02010//ABC transporters;K05668//ATP-binding cassette, subfamily C (CFTR/MRP), member 5+ko01523//Antifolate resistance+ko02010//ABC transporters;K05668//ATP-binding cassette, subfamily C (CFTR/MRP), member 5+ko01523//Antifolate resistance+ko02010//ABC transporters
54637	0.6	1.68	1.48543	1.1452e-05	4.18064e-06	Praf2	GO:0071702//organic substance transport;GO:0042886//amide transport;GO:0033036//macromolecule localization;GO:0051179//localization;GO:0015833//peptide transport;GO:0008104//protein localization;GO:0051234//establishment of localization;GO:0071705//nitrogen compound transport;GO:0006810//transport;GO:0045184//establishment of protein localization;GO:0015031//protein transport;GO:0044464//cell par…	K20392//PRA1 family protein 2
77035	0.35	0.98	1.48543	2.41218e-05	9.1497e-06	Kdm8	GO:1901360//organic cyclic compound metabolic process;GO:0034641//cellular nitrogen compound metabolic process;GO:0044237//cellular metabolic process;GO:0051173//positive regulation of nitrogen compound metabolic process;GO:0031323//regulation of cellular metabolic process;GO:0019538//protein metabolic process;GO:0051276//chromosome organization;GO:0036211//protein modification process;GO:0006807…	K10277//lysine-specific demethylase 8 [EC:1.14.11.27];K10277//lysine-specific demethylase 8 [EC:1.14.11.27]
384214	0.97	2.71	1.48224	8.57259e-08	2.56718e-08	Ephx4	GO:0016020//membrane;GO:0031224//intrinsic component of membrane;GO:0044425//membrane part;GO:0016021//integral component of membrane;GO:0003824//catalytic activity;GO:0016787//hydrolase activity;	K22369//epoxide hydrolase 4 [EC:3.3.-.-]
12193	0.24	0.67	1.48113	5.66406e-07	1.81514e-07	Zfp36l2	GO:0009725//response to hormone;GO:0042221//response to chemical;GO:0051172//negative regulation of nitrogen compound metabolic process;GO:0000956//nuclear-transcribed mRNA catabolic process;GO:0045599//negative regulation of fat cell differentiation;GO:0070371//ERK1 and ERK2 cascade;GO:0048519//negative regulation of biological process;GO:0007154//cell communication;GO:0014070//response to organ…	K18753//butyrate response factor+ko04218//Cellular senescence
12660	0.46	1.28	1.47644	1.09962e-06	3.60922e-07	Chka	GO:0010033//response to organic substance;GO:0009987//cellular process;GO:0008610//lipid biosynthetic process;GO:0045017//glycerolipid biosynthetic process;GO:0006793//phosphorus metabolic process;GO:0006810//transport;GO:0044238//primary metabolic process;GO:0046474//glycerophospholipid biosynthetic process;GO:0006576//cellular biogenic amine metabolic process;GO:0006629//lipid metabolic process…	K14156//choline/ethanolamine kinase [EC:2.7.1.32 2.7.1.82]+ko00564//Glycerophospholipid metabolism+ko05231//Choline metabolism in cancer+ko01100//Metabolic pathways;K14156//choline/ethanolamine kinase [EC:2.7.1.32 2.7.1.82]+ko00564//Glycerophospholipid metabolism+ko05231//Choline metabolism in cancer+ko01100//Metabolic pathways;K14156//choline/ethanolamine kinase [EC:2.7.1.32 2.7.1.82]+ko00564//G…
210973	0.23	0.64	1.47644	8.06882e-07	2.62192e-07	Kbtbd2	GO:0032446//protein modification by small protein conjugation;GO:0009987//cellular process;GO:0043170//macromolecule metabolic process;GO:0006807//nitrogen compound metabolic process;GO:1901564//organonitrogen compound metabolic process;GO:0036211//protein modification process;GO:0043412//macromolecule modification;GO:0016567//protein ubiquitination;GO:0006464//cellular protein modification proce…	K10470//kelch repeat and BTB domain-containing protein 2
22700	0.94	2.61	1.47332	7.2902e-23	9.26046e-24	Zfp40	GO:0065007//biological regulation;GO:0051171//regulation of nitrogen compound metabolic process;GO:0031326//regulation of cellular biosynthetic process;GO:0080090//regulation of primary metabolic process;GO:0050794//regulation of cellular process;GO:0009889//regulation of biosynthetic process;GO:2000112//regulation of cellular macromolecule biosynthetic process;GO:1903506//regulation of nucleic a…	K09228//KRAB domain-containing zinc finger protein
328231	0.48	1.33	1.47032	7.43294e-06	2.65298e-06	Gm5082
19286	1.94	5.36	1.46618	1.45586e-13	2.87224e-14	Pts	GO:1901362//organic cyclic compound biosynthetic process;GO:0006066//alcohol metabolic process;GO:0046173//polyol biosynthetic process;GO:0051186//cofactor metabolic process;GO:0034311//diol metabolic process;GO:0006732//coenzyme metabolic process;GO:0006729//tetrahydrobiopterin biosynthetic process;GO:0034641//cellular nitrogen compound metabolic process;GO:0019751//polyol metabolic process;GO:0…	K01737//6-pyruvoyltetrahydropterin/6-carboxytetrahydropterin synthase [EC:4.2.3.12 4.1.2.50]+ko01100//Metabolic pathways+ko00790//Folate biosynthesis;K01737//6-pyruvoyltetrahydropterin/6-carboxytetrahydropterin synthase [EC:4.2.3.12 4.1.2.50]+ko01100//Metabolic pathways+ko00790//Folate biosynthesis;K01737//6-pyruvoyltetrahydropterin/6-carboxytetrahydropterin synthase [EC:4.2.3.12 4.1.2.50]+ko0110…
223601	0.41	1.13	1.46263	0.000170606	7.19224e-05	Fam49b	GO:1903037//regulation of leukocyte cell-cell adhesion;GO:0002821//positive regulation of adaptive immune response;GO:0050778//positive regulation of immune response;GO:0002708//positive regulation of lymphocyte mediated immunity;GO:0002694//regulation of leukocyte activation;GO:0002576//platelet degranulation;GO:0002709//regulation of T cell mediated immunity;GO:0002699//positive regulation of i…
14394	0.11	0.3	1.44746	0.000525936	0.000238172	Gabra1	GO:0006820//anion transport;GO:0051179//localization;GO:0098661//inorganic anion transmembrane transport;GO:0050896//response to stimulus;GO:0006821//chloride transport;GO:0009719//response to endogenous stimulus;GO:0098660//inorganic ion transmembrane transport;GO:0055085//transmembrane transport;GO:0007186//G-protein coupled receptor signaling pathway;GO:0010243//response to organonitrogen comp…	K05175//gamma-aminobutyric acid receptor subunit alpha+ko04727//GABAergic synapse+ko04723//Retrograde endocannabinoid signaling+ko05033//Nicotine addiction+ko05032//Morphine addiction+ko04080//Neuroactive ligand-receptor interaction+ko04742//Taste transduction
238161	0.18	0.49	1.44478	4.87753e-13	9.97348e-14	Akap6	GO:0034764//positive regulation of transmembrane transport;GO:0065007//biological regulation;GO:0051716//cellular response to stimulus;GO:0042391//regulation of membrane potential;GO:0010033//response to organic substance;GO:0048522//positive regulation of cellular process;GO:1901381//positive regulation of potassium ion transmembrane transport;GO:0050794//regulation of cellular process;GO:004668…	K16523//A-kinase anchor protein 6
242747	1.64	4.46	1.44335	2.20186e-45	1.37347e-46	Zfp933	GO:0065007//biological regulation;GO:0010556//regulation of macromolecule biosynthetic process;GO:0019222//regulation of metabolic process;GO:2001141//regulation of RNA biosynthetic process;GO:0031326//regulation of cellular biosynthetic process;GO:0006355//regulation of transcription, DNA-templated;GO:0050789//regulation of biological process;GO:2000112//regulation of cellular macromolecule bios…	K09228//KRAB domain-containing zinc finger protein
105242430	0.85	2.31	1.44236	7.37822e-05	2.97828e-05	Gm38699		K09228//KRAB domain-containing zinc finger protein
18718	0.42	1.14	1.44057	3.17906e-10	7.85592e-11	Pip4k2a	GO:0060348//bone development;GO:0009987//cellular process;GO:0050789//regulation of biological process;GO:0033043//regulation of organelle organization;GO:0065007//biological regulation;GO:0030154//cell differentiation;GO:0010508//positive regulation of autophagy;GO:1902117//positive regulation of organelle assembly;GO:0044088//regulation of vacuole organization;GO:0048534//hematopoietic or lymph…	K00920//1-phosphatidylinositol-5-phosphate 4-kinase [EC:2.7.1.149]+ko04810//Regulation of actin cytoskeleton+ko04070//Phosphatidylinositol signaling system+ko00562//Inositol phosphate metabolism;K00920//1-phosphatidylinositol-5-phosphate 4-kinase [EC:2.7.1.149]+ko04810//Regulation of actin cytoskeleton+ko04070//Phosphatidylinositol signaling system+ko00562//Inositol phosphate metabolism;K00920//1…
105243585	33.78	90.52	1.42207	0	0	Gm39469		K09228//KRAB domain-containing zinc finger protein
71693	0.4	1.07	1.41954	0.000320785	0.000140656	Colec11	GO:0048598//embryonic morphogenesis;GO:0048856//anatomical structure development;GO:0072359//circulatory system development;GO:0042246//tissue regeneration;GO:0009888//tissue development;GO:0009790//embryo development;GO:0009653//anatomical structure morphogenesis;GO:0042060//wound healing;GO:0001568//blood vessel development;GO:0072358//cardiovascular system development;GO:0040007//growth;GO:003…	K10066//collectin sub-family member 11+ko04145//Phagosome;K16630//collagen, type XXII, alpha+ko04974//Protein digestion and absorption
108168055	1.12	2.99	1.41665	8.83601e-10	2.25484e-10	LOC108168055	GO:0065007//biological regulation;GO:1903506//regulation of nucleic acid-templated transcription;GO:0050794//regulation of cellular process;GO:0051252//regulation of RNA metabolic process;GO:0019222//regulation of metabolic process;GO:0006355//regulation of transcription, DNA-templated;GO:0051171//regulation of nitrogen compound metabolic process;GO:0010468//regulation of gene expression;GO:00313…	K09228//KRAB domain-containing zinc finger protein;K09228//KRAB domain-containing zinc finger protein
15257	0.12	0.32	1.41504	2.5969e-06	8.84468e-07	Hipk1	GO:0019222//regulation of metabolic process;GO:0097190//apoptotic signaling pathway;GO:0016043//cellular component organization;GO:0019219//regulation of nucleobase-containing compound metabolic process;GO:0006355//regulation of transcription, DNA-templated;GO:0009058//biosynthetic process;GO:0031076//embryonic camera-type eye development;GO:0044238//primary metabolic process;GO:0080090//regulati…	K08826//homeodomain interacting protein kinase [EC:2.7.11.1]+ko04218//Cellular senescence;K08826//homeodomain interacting protein kinase [EC:2.7.11.1]+ko04218//Cellular senescence
214585	0.09	0.24	1.41504	5.54938e-05	2.204e-05	Spg11	GO:0009987//cellular process;GO:0030705//cytoskeleton-dependent intracellular transport;GO:0043277//apoptotic cell clearance;GO:0051650//establishment of vesicle localization;GO:0048856//anatomical structure development;GO:0032502//developmental process;GO:0050789//regulation of biological process;GO:0090174//organelle membrane fusion;GO:0007267//cell-cell signaling;GO:0099111//microtubule-based …	K19026//spatacsin;K19026//spatacsin;K19026//spatacsin;K19026//spatacsin
241516	0.03	0.08	1.41504	2.91508e-06	1.00111e-06	Fsip2		K14000//ribosome-binding protein 1+ko04141//Protein processing in endoplasmic reticulum
72123	0.18	0.48	1.41504	1.46934e-05	5.43622e-06	Ccdc71l		K16628//collagen, type VII, alpha+ko04974//Protein digestion and absorption
71640	0.56	1.49	1.41181	3.59008e-12	7.73266e-13	Zfp949	GO:0051252//regulation of RNA metabolic process;GO:0051171//regulation of nitrogen compound metabolic process;GO:0010556//regulation of macromolecule biosynthetic process;GO:0019222//regulation of metabolic process;GO:0080090//regulation of primary metabolic process;GO:2001141//regulation of RNA biosynthetic process;GO:0009889//regulation of biosynthetic process;GO:0010468//regulation of gene exp…	K09228//KRAB domain-containing zinc finger protein;K09228//KRAB domain-containing zinc finger protein
102634581	2.62	6.97	1.41159	1.65969e-16	2.80226e-17	LOC102634581		K15413//nuclear autoantigen Sp-100+ko05203//Viral carcinogenesis+ko05168//Herpes simplex infection
BGI_novel_G000688	2	5.31	1.40871	8.09109e-11	1.91369e-11	BGI_novel_G000688		K06831//galectin-3
68033	1.96	5.2	1.40766	3.97302e-09	1.07025e-09	Cox19	GO:0015980//energy derivation by oxidation of organic compounds;GO:0043933//macromolecular complex subunit organization;GO:0065003//macromolecular complex assembly;GO:0097034//mitochondrial respiratory chain complex IV biogenesis;GO:0033617//mitochondrial respiratory chain complex IV assembly;GO:0006996//organelle organization;GO:0045333//cellular respiration;GO:0033108//mitochondrial respiratory…	K18183//cytochrome c oxidase assembly protein subunit 19+ko04714//Thermogenesis
BGI_novel_G000679	4.74	12.55	1.40473	8.74162e-65	3.6003e-66	BGI_novel_G000679	GO:0006950//response to stress;GO:0006952//defense response;GO:0006954//inflammatory response;GO:0050896//response to stimulus;GO:0044421//extracellular region part;GO:0005576//extracellular region;GO:1903561//extracellular vesicle;GO:0043226//organelle;GO:0005615//extracellular space;GO:0070062//extracellular exosome;GO:0043230//extracellular organelle;GO:0043227//membrane-bounded organelle;GO:0…	K22265//NACHT, LRR and PYD domains-containing protein 4
BGI_novel_G000565	0.31	0.82	1.40336	0.000703939	0.000325042	BGI_novel_G000565		K09228//KRAB domain-containing zinc finger protein
11432	0.28	0.74	1.4021	3.23976e-06	1.11813e-06	Acp2	GO:0007040//lysosome organization;GO:0009987//cellular process;GO:0048731//system development;GO:0006996//organelle organization;GO:0007033//vacuole organization;GO:0080171//lytic vacuole organization;GO:0032502//developmental process;GO:0007275//multicellular organism development;GO:0048856//anatomical structure development;GO:0001501//skeletal system development;GO:0071840//cellular component o…	K14410//lysosomal acid phosphatase [EC:3.1.3.2]+ko04142//Lysosome+ko00740//Riboflavin metabolism+ko01100//Metabolic pathways;K14410//lysosomal acid phosphatase [EC:3.1.3.2]+ko04142//Lysosome+ko00740//Riboflavin metabolism+ko01100//Metabolic pathways
620292	0.64	1.69	1.40088	3.064e-10	7.5658e-11	Cntnap5c	GO:0022610//biological adhesion;GO:0007155//cell adhesion;GO:0044425//membrane part;GO:0031224//intrinsic component of membrane;GO:0016020//membrane;GO:0016021//integral component of membrane;	K07380//contactin associated protein-like 2+ko04514//Cell adhesion molecules (CAMs);K07380//contactin associated protein-like 2+ko04514//Cell adhesion molecules (CAMs)
68192	0.77	2.03	1.39855	1.11239e-12	2.32582e-13	Leprotl1	GO:2000009//negative regulation of protein localization to cell surface;GO:0051641//cellular localization;GO:0032509//endosome transport via multivesicular body sorting pathway;GO:0016192//vesicle-mediated transport;GO:0032511//late endosome to vacuole transport via multivesicular body sorting pathway;GO:0045324//late endosome to vacuole transport;GO:0016197//endosomal transport;GO:0060341//regul…
69376	1.36	3.58	1.39635	6.06939e-10	1.52931e-10	Zpbp2	GO:0048232//male gamete generation;GO:0032502//developmental process;GO:0007283//spermatogenesis;GO:0030154//cell differentiation;GO:0003006//developmental process involved in reproduction;GO:0032504//multicellular organism reproduction;GO:0008037//cell recognition;GO:0071840//cellular component organization or biogenesis;GO:0048646//anatomical structure formation involved in morphogenesis;GO:002…
BGI_novel_G000531	0.6	1.57	1.38773	9.87214e-05	4.03914e-05	BGI_novel_G000531	GO:0043933//macromolecular complex subunit organization;GO:0065003//macromolecular complex assembly;GO:0044249//cellular biosynthetic process;GO:0043603//cellular amide metabolic process;GO:0071826//ribonucleoprotein complex subunit organization;GO:0043604//amide biosynthetic process;GO:0016043//cellular component organization;GO:0044271//cellular nitrogen compound biosynthetic process;GO:0006412…	K02896//large subunit ribosomal protein L24e+ko03010//Ribosome
338349	2.24	5.86	1.3874	3.33694e-62	1.4459e-63	Cntln	GO:0007010//cytoskeleton organization;GO:0033036//macromolecule localization;GO:0007049//cell cycle;GO:0034613//cellular protein localization;GO:0008104//protein localization;GO:0016043//cellular component organization;GO:0031023//microtubule organizing center organization;GO:0007098//centrosome cycle;GO:0006996//organelle organization;GO:0071840//cellular component organization or biogenesis;GO:…	K16467//centlein;K16467//centlein;K16467//centlein;K16467//centlein;K16467//centlein
20650	0.49	1.28	1.38529	2.76756e-13	5.56304e-14	Sntb2	GO:0005623//cell;GO:0097708//intracellular vesicle;GO:0005622//intracellular;GO:0044430//cytoskeletal part;GO:0098588//bounding membrane of organelle;GO:0005576//extracellular region;GO:0044422//organelle part;GO:0043232//intracellular non-membrane-bounded organelle;GO:0030054//cell junction;GO:0070062//extracellular exosome;GO:0005912//adherens junction;GO:0045202//synapse;GO:0031982//vesicle;GO…	K12196//vacuolar protein-sorting-associated protein 4+ko04144//Endocytosis+ko04217//Necroptosis;K14548//U3 small nucleolar RNA-associated protein 4+ko03008//Ribosome biogenesis in eukaryotes;K12076//disks large protein 1+ko04391//Hippo signaling pathway - fly+ko04390//Hippo signaling pathway+ko04660//T cell receptor signaling pathway+ko04530//Tight junction+ko05203//Viral carcinogenesis+ko05165//…
239611	1.25	3.24	1.37407	9.52796e-08	2.8659e-08	Muc19	GO:0032102//negative regulation of response to external stimulus;GO:0031347//regulation of defense response;GO:0030154//cell differentiation;GO:0050789//regulation of biological process;GO:0048585//negative regulation of response to stimulus;GO:0048534//hematopoietic or lymphoid organ development;GO:0048869//cellular developmental process;GO:0032501//multicellular organismal process;GO:0048732//g…	K22020//mucin-19;K22020//mucin-19
234964	1.98	5.11	1.36782	8.72082e-21	1.20183e-21	Ccdc67	GO:0031023//microtubule organizing center organization;GO:0006996//organelle organization;GO:0022402//cell cycle process;GO:0007099//centriole replication;GO:0051298//centrosome duplication;GO:0009888//tissue development;GO:0030855//epithelial cell differentiation;GO:0007049//cell cycle;GO:0009987//cellular process;GO:0071840//cellular component organization or biogenesis;GO:0098535//de novo cent…	K16763//centrosomal protein CEP63
20429	1.33	3.41	1.35835	1.90388e-19	2.78588e-20	Shox2	GO:0032501//multicellular organismal process;GO:0010604//positive regulation of macromolecule metabolic process;GO:0048562//embryonic organ morphogenesis;GO:1902679//negative regulation of RNA biosynthetic process;GO:0032330//regulation of chondrocyte differentiation;GO:0022604//regulation of cell morphogenesis;GO:0009893//positive regulation of metabolic process;GO:0048557//embryonic digestive t…	K09331//short stature homeobox protein
13478	0.43	1.1	1.35509	4.86746e-05	1.91137e-05	Dpagt1	GO:0044260//cellular macromolecule metabolic process;GO:0055086//nucleobase-containing small molecule metabolic process;GO:0070085//glycosylation;GO:0034641//cellular nitrogen compound metabolic process;GO:0034645//cellular macromolecule biosynthetic process;GO:0008610//lipid biosynthetic process;GO:0009225//nucleotide-sugar metabolic process;GO:0006720//isoprenoid metabolic process;GO:0009058//b…	K01001//UDP-N-acetylglucosamine--dolichyl-phosphate N-acetylglucosaminephosphotransferase [EC:2.7.8.15]+ko00510//N-Glycan biosynthesis+ko01100//Metabolic pathways;K01001//UDP-N-acetylglucosamine--dolichyl-phosphate N-acetylglucosaminephosphotransferase [EC:2.7.8.15]+ko00510//N-Glycan biosynthesis+ko01100//Metabolic pathways;K01001//UDP-N-acetylglucosamine--dolichyl-phosphate N-acetylglucosamineph…
17996	0.09	0.23	1.35364	2.17061e-12	4.62734e-13	Neb	GO:0051493//regulation of cytoskeleton organization;GO:0030036//actin cytoskeleton organization;GO:0016043//cellular component organization;GO:0031032//actomyosin structure organization;GO:0055001//muscle cell development;GO:0048856//anatomical structure development;GO:0032502//developmental process;GO:0051128//regulation of cellular component organization;GO:0071840//cellular component organizat…	K18267//nebulin;K18267//nebulin;K18267//nebulin
67468	0.9	2.3	1.35364	2.20682e-12	4.7129e-13	Mmd	GO:0042325//regulation of phosphorylation;GO:0051174//regulation of phosphorus metabolic process;GO:0060255//regulation of macromolecule metabolic process;GO:0050767//regulation of neurogenesis;GO:0051171//regulation of nitrogen compound metabolic process;GO:0031399//regulation of protein modification process;GO:0010720//positive regulation of cell development;GO:0051246//regulation of protein me…	K11064//monocyte to macrophage differentiation protein;K11064//monocyte to macrophage differentiation protein
234358	9.75	24.86	1.35035	1.82392e-157	2.4388e-159	Zfp930	GO:0050789//regulation of biological process;GO:0019222//regulation of metabolic process;GO:2000112//regulation of cellular macromolecule biosynthetic process;GO:0019219//regulation of nucleobase-containing compound metabolic process;GO:0010468//regulation of gene expression;GO:0010556//regulation of macromolecule biosynthetic process;GO:1903506//regulation of nucleic acid-templated transcription…	K09228//KRAB domain-containing zinc finger protein;K09228//KRAB domain-containing zinc finger protein
320705	0.33	0.84	1.34792	3.76178e-05	1.45963e-05	Bend6	GO:0048519//negative regulation of biological process;GO:2000026//regulation of multicellular organismal development;GO:0050794//regulation of cellular process;GO:0045666//positive regulation of neuron differentiation;GO:0050767//regulation of neurogenesis;GO:1901362//organic cyclic compound biosynthetic process;GO:0044260//cellular macromolecule metabolic process;GO:0009058//biosynthetic process…	K21245//transcription factor SPT20 homolog+ko04140//Autophagy - animal;K04953//cyclic nucleotide gated channel beta 3+ko04024//cAMP signaling pathway
380629	1.05	2.67	1.34645	1.25676e-27	1.32453e-28	Heca	GO:0045786//negative regulation of cell cycle;GO:0048523//negative regulation of cellular process;GO:0007346//regulation of mitotic cell cycle;GO:0051726//regulation of cell cycle;GO:0050794//regulation of cellular process;GO:0048519//negative regulation of biological process;GO:0065007//biological regulation;GO:0050789//regulation of biological process;GO:0045930//negative regulation of mitotic …	K10867//nibrin+ko04218//Cellular senescence+ko03440//Homologous recombination;K14000//ribosome-binding protein 1+ko04141//Protein processing in endoplasmic reticulum;K14000//ribosome-binding protein 1+ko04141//Protein processing in endoplasmic reticulum;K14000//ribosome-binding protein 1+ko04141//Protein processing in endoplasmic reticulum;K03129//transcription initiation factor TFIID subunit 4+k…
105245578	0.59	1.5	1.34618	0.00021684	9.2699e-05	LOC105245578	GO:0019219//regulation of nucleobase-containing compound metabolic process;GO:0006355//regulation of transcription, DNA-templated;GO:0051171//regulation of nitrogen compound metabolic process;GO:0010468//regulation of gene expression;GO:2000112//regulation of cellular macromolecule biosynthetic process;GO:2001141//regulation of RNA biosynthetic process;GO:0050794//regulation of cellular process;G…	K09228//KRAB domain-containing zinc finger protein
BGI_novel_G000710	1.82	4.62	1.34395	5.92211e-10	1.49145e-10	BGI_novel_G000710	GO:0003300//cardiac muscle hypertrophy;GO:0009987//cellular process;GO:0032502//developmental process;GO:0008361//regulation of cell size;GO:0019725//cellular homeostasis;GO:0042592//homeostatic process;GO:0014897//striated muscle hypertrophy;GO:0090066//regulation of anatomical structure size;GO:0003008//system process;GO:0014896//muscle hypertrophy;GO:0003012//muscle system process;GO:0048869//…	K11276//nucleophosmin 1
69581	0.15	0.38	1.34104	0.000928488	0.000434524	Rhou	GO:0032386//regulation of intracellular transport;GO:0022604//regulation of cell morphogenesis;GO:0090316//positive regulation of intracellular protein transport;GO:1903533//regulation of protein targeting;GO:0010822//positive regulation of mitochondrion organization;GO:0010638//positive regulation of organelle organization;GO:0035556//intracellular signal transduction;GO:0008360//regulation of c…	K07865//Ras homolog gene family, member U
105242453	0.82	2.07	1.33593	1.97602e-14	3.714e-15	LOC105242453	GO:0050789//regulation of biological process;GO:1903506//regulation of nucleic acid-templated transcription;GO:0031326//regulation of cellular biosynthetic process;GO:0065007//biological regulation;GO:0010556//regulation of macromolecule biosynthetic process;GO:0019222//regulation of metabolic process;GO:0031323//regulation of cellular metabolic process;GO:0010468//regulation of gene expression;G…	K09228//KRAB domain-containing zinc finger protein
210757	0.25	0.63	1.33342	4.20526e-07	1.33094e-07	Themis	GO:0050776//regulation of immune response;GO:0009987//cellular process;GO:0023052//signaling;GO:0002684//positive regulation of immune system process;GO:0050778//positive regulation of immune response;GO:0002682//regulation of immune system process;GO:0065007//biological regulation;GO:0048518//positive regulation of biological process;GO:0002521//leukocyte differentiation;GO:0048584//positive reg…
102640673	45.13	113.7	1.33307	0	0	LOC102640673		K09228//KRAB domain-containing zinc finger protein;K09228//KRAB domain-containing zinc finger protein
70099	36.7	92.34	1.33118	0	0	Smc4	GO:0070192//chromosome organization involved in meiotic cell cycle;GO:0000280//nuclear division;GO:0071840//cellular component organization or biogenesis;GO:0007076//mitotic chromosome condensation;GO:0051321//meiotic cell cycle;GO:0007049//cell cycle;GO:0006996//organelle organization;GO:0140014//mitotic nuclear division;GO:0048285//organelle fission;GO:0000070//mitotic sister chromatid segregat…	K06675//structural maintenance of chromosome 4
667794	3.01	7.56	1.32862	1.72064e-08	4.89332e-09	Gm8817
71830	0.53	1.33	1.32736	4.99898e-06	1.75524e-06	Pdilt	GO:0010646//regulation of cell communication;GO:0050789//regulation of biological process;GO:0043412//macromolecule modification;GO:0006950//response to stress;GO:0010941//regulation of cell death;GO:0051179//localization;GO:0019511//peptidyl-proline hydroxylation;GO:1902175//regulation of oxidative stress-induced intrinsic apoptotic signaling pathway;GO:0030154//cell differentiation;GO:0048583//…	K20354//protein disulfide-isomerase-like protein of the testis;K20354//protein disulfide-isomerase-like protein of the testis
101056073	0.99	2.48	1.32484	1.0776e-13	2.10966e-14	LOC101056073	GO:1903506//regulation of nucleic acid-templated transcription;GO:0031323//regulation of cellular metabolic process;GO:0007275//multicellular organism development;GO:0050794//regulation of cellular process;GO:0006355//regulation of transcription, DNA-templated;GO:0030154//cell differentiation;GO:0030097//hemopoiesis;GO:0048731//system development;GO:0002520//immune system development;GO:0032501//…	K09228//KRAB domain-containing zinc finger protein;K09228//KRAB domain-containing zinc finger protein
22441	0.78	1.95	1.32193	0.000200008	8.4986e-05	Xlr	GO:0009987//cellular process;GO:0051321//meiotic cell cycle;GO:0022414//reproductive process;GO:0030154//cell differentiation;GO:0048731//system development;GO:0002244//hematopoietic progenitor cell differentiation;GO:0032502//developmental process;GO:0000003//reproduction;GO:0048534//hematopoietic or lymphoid organ development;GO:0007275//multicellular organism development;GO:0002376//immune sys…	K19528//synaptonemal complex protein 3+ko03440//Homologous recombination;K19528//synaptonemal complex protein 3+ko03440//Homologous recombination;K19528//synaptonemal complex protein 3+ko03440//Homologous recombination;K19528//synaptonemal complex protein 3+ko03440//Homologous recombination
235542	0.2	0.5	1.32193	3.59691e-06	1.24752e-06	Ppp2r3a	GO:0048731//system development;GO:0009887//animal organ morphogenesis;GO:0019222//regulation of metabolic process;GO:0065007//biological regulation;GO:0007399//nervous system development;GO:0060828//regulation of canonical Wnt signaling pathway;GO:0050794//regulation of cellular process;GO:0022603//regulation of anatomical structure morphogenesis;GO:0010648//negative regulation of cell communicat…	K11583//serine/threonine-protein phosphatase 2A regulatory subunit B''+ko04071//Sphingolipid signaling pathway+ko04728//Dopaminergic synapse+ko04261//Adrenergic signaling in cardiomyocytes+ko03015//mRNA surveillance pathway+ko04152//AMPK signaling pathway+ko04151//PI3K-Akt signaling pathway+ko05165//Human papillomavirus infection;K11583//serine/threonine-protein phosphatase 2A regulatory subunit …
BGI_novel_G000726	0.65	1.62	1.31748	2.95199e-06	1.01472e-06	BGI_novel_G000726	GO:0031224//intrinsic component of membrane;GO:0044425//membrane part;GO:0016021//integral component of membrane;GO:0016020//membrane;	K14650//transcription initiation factor TFIID subunit 3+ko03022//Basal transcription factors+ko05168//Herpes simplex infection
BGI_novel_G000496	0.55	1.37	1.31667	5.4031e-07	1.72981e-07	BGI_novel_G000496		K13963//serpin B+ko05146//Amoebiasis
236366	1.82	4.53	1.31557	8.15882e-23	1.03844e-23	5730507C01Rik	GO:0031323//regulation of cellular metabolic process;GO:0009889//regulation of biosynthetic process;GO:0019219//regulation of nucleobase-containing compound metabolic process;GO:0080090//regulation of primary metabolic process;GO:0019222//regulation of metabolic process;GO:0065007//biological regulation;GO:2001141//regulation of RNA biosynthetic process;GO:0051252//regulation of RNA metabolic pro…	K09228//KRAB domain-containing zinc finger protein
108169060	1.55	3.85	1.31259	4.40027e-17	7.22416e-18	LOC108169060		K09228//KRAB domain-containing zinc finger protein
68134	5.68	14.1	1.31173	5.68336e-68	2.20452e-69	Upf3b	GO:0010629//negative regulation of gene expression;GO:0071704//organic substance metabolic process;GO:0031325//positive regulation of cellular metabolic process;GO:0006986//response to unfolded protein;GO:0032268//regulation of cellular protein metabolic process;GO:0042221//response to chemical;GO:2000112//regulation of cellular macromolecule biosynthetic process;GO:0044270//cellular nitrogen com…	K14328//regulator of nonsense transcripts 3+ko03013//RNA transport+ko03015//mRNA surveillance pathway;K14328//regulator of nonsense transcripts 3+ko03013//RNA transport+ko03015//mRNA surveillance pathway
71323	0.25	0.62	1.31034	1.09005e-12	2.27636e-13	Rassf8	GO:0007154//cell communication;GO:0050896//response to stimulus;GO:0065007//biological regulation;GO:0050794//regulation of cellular process;GO:0034330//cell junction organization;GO:0071840//cellular component organization or biogenesis;GO:0051716//cellular response to stimulus;GO:0034332//adherens junction organization;GO:0045216//cell-cell junction organization;GO:0007165//signal transduction;…	K09855//Ras association domain-containing protein 7/8
73233	6.93	17.16	1.30812	1.79789e-113	3.62866e-115	Zfp942	GO:0050789//regulation of biological process;GO:0019222//regulation of metabolic process;GO:0009889//regulation of biosynthetic process;GO:0065007//biological regulation;GO:0031323//regulation of cellular metabolic process;GO:0006355//regulation of transcription, DNA-templated;GO:0050794//regulation of cellular process;GO:0051171//regulation of nitrogen compound metabolic process;GO:0010628//posi…	K09228//KRAB domain-containing zinc finger protein;K09228//KRAB domain-containing zinc finger protein
80334	1.15	2.84	1.30426	3.0001e-13	6.04182e-14	Kcnip4	GO:1901379//regulation of potassium ion transmembrane transport;GO:0072659//protein localization to plasma membrane;GO:0034762//regulation of transmembrane transport;GO:0065007//biological regulation;GO:0044057//regulation of system process;GO:0043269//regulation of ion transport;GO:0051049//regulation of transport;GO:0070727//cellular macromolecule localization;GO:0061337//cardiac conduction;GO:…	K16575//centractin;K19932//neuronal calcium sensor 1
101055890	1.09	2.69	1.30328	9.03567e-11	2.14508e-11	Gm29738		K09228//KRAB domain-containing zinc finger protein
69324	0.77	1.9	1.30307	4.60389e-09	1.2489e-09	1700012B07Rik
BGI_novel_G000397	0.45	1.11	1.30256	4.06797e-06	1.41731e-06	BGI_novel_G000397		K07817//receptor-type tyrosine-protein phosphatase N [EC:3.1.3.48]+ko04940//Type I diabetes mellitus;K16493//protocadherin alpha
94212	0.39	0.96	1.29956	2.63751e-15	4.72274e-16	Pag1	GO:0007162//negative regulation of cell adhesion;GO:0007169//transmembrane receptor protein tyrosine kinase signaling pathway;GO:0051249//regulation of lymphocyte activation;GO:0022408//negative regulation of cell-cell adhesion;GO:0002682//regulation of immune system process;GO:0050794//regulation of cellular process;GO:0051250//negative regulation of lymphocyte activation;GO:0050896//response to…
108167362	1.7	4.18	1.29797	1.41336e-12	2.97826e-13	LOC108167362		K09228//KRAB domain-containing zinc finger protein
243548	0.46	1.13	1.29662	1.43592e-18	2.19984e-19	Prickle2	GO:0005622//intracellular;GO:0044424//intracellular part;GO:0044464//cell part;GO:0005737//cytoplasm;GO:0005623//cell;GO:0043169//cation binding;GO:0046914//transition metal ion binding;GO:0005488//binding;GO:0046872//metal ion binding;GO:0043167//ion binding;GO:0008270//zinc ion binding;	K04511//prickle+ko04310//Wnt signaling pathway
102639700	0.9	2.21	1.29605	1.27427e-17	2.03658e-18	LOC102639700	GO:0080090//regulation of primary metabolic process;GO:0031326//regulation of cellular biosynthetic process;GO:0050789//regulation of biological process;GO:1903506//regulation of nucleic acid-templated transcription;GO:2001141//regulation of RNA biosynthetic process;GO:0010556//regulation of macromolecule biosynthetic process;GO:0019219//regulation of nucleobase-containing compound metabolic proc…	K09228//KRAB domain-containing zinc finger protein;K09228//KRAB domain-containing zinc finger protein;K09228//KRAB domain-containing zinc finger protein
67483	0.97	2.38	1.2949	1.00006e-07	3.01186e-08	1700028P14Rik	GO:0005737//cytoplasm;GO:0044424//intracellular part;GO:0005623//cell;GO:0005622//intracellular;GO:0016020//membrane;GO:0071944//cell periphery;GO:0044425//membrane part;GO:0016021//integral component of membrane;GO:0044464//cell part;GO:0031224//intrinsic component of membrane;GO:0005886//plasma membrane;
237412	9.58	23.44	1.29088	1.44403e-159	1.90352e-161	Gm4924		K09228//KRAB domain-containing zinc finger protein;K09228//KRAB domain-containing zinc finger protein
20254	0.27	0.66	1.28951	0.000468496	0.00021086	Scg2	GO:0023057//negative regulation of signaling;GO:0051179//localization;GO:0032501//multicellular organismal process;GO:0048245//eosinophil chemotaxis;GO:0043067//regulation of programmed cell death;GO:0040017//positive regulation of locomotion;GO:1901564//organonitrogen compound metabolic process;GO:0001525//angiogenesis;GO:0051716//cellular response to stimulus;GO:0050918//positive chemotaxis;GO:…
214384	0.09	0.22	1.28951	0.000272162	0.0001181	Myocd	GO:0003301//physiological cardiac muscle hypertrophy;GO:0003300//cardiac muscle hypertrophy;GO:0048513//animal organ development;GO:0055006//cardiac cell development;GO:0048468//cell development;GO:0007275//multicellular organism development;GO:0016043//cellular component organization;GO:0060419//heart growth;GO:0048738//cardiac muscle tissue development;GO:0014897//striated muscle hypertrophy;GO…	K22526//myocardin;K22526//myocardin;K22526//myocardin;K22526//myocardin;K22526//myocardin;K22526//myocardin
217935	0.52	1.27	1.28824	9.57218e-11	2.27728e-11	Wdr60	GO:0016043//cellular component organization;GO:0048706//embryonic skeletal system development;GO:0044782//cilium organization;GO:0048598//embryonic morphogenesis;GO:0070925//organelle assembly;GO:0120031//plasma membrane bounded cell projection assembly;GO:0001501//skeletal system development;GO:0048513//animal organ development;GO:0048705//skeletal system morphogenesis;GO:0006996//organelle orga…	K18626//trichohyalin
BGI_novel_G000461	1.04	2.53	1.28255	1.79315e-08	5.10406e-09	BGI_novel_G000461
12630	0.35	0.85	1.28011	0.000215512	9.2104e-05	Cfi	GO:0002460//adaptive immune response based on somatic recombination of immune receptors built from immunoglobulin superfamily domains;GO:0002684//positive regulation of immune system process;GO:0065007//biological regulation;GO:0008152//metabolic process;GO:0019538//protein metabolic process;GO:0043170//macromolecule metabolic process;GO:0002455//humoral immune response mediated by circulating im…	K01333//complement factor I [EC:3.4.21.45]+ko04610//Complement and coagulation cascades+ko05150//Staphylococcus aureus infection
242505	0.35	0.85	1.28011	8.16679e-05	3.31256e-05	Rasef	GO:0051259//protein oligomerization;GO:0016043//cellular component organization;GO:0044085//cellular component biogenesis;GO:0070271//protein complex biogenesis;GO:0022607//cellular component assembly;GO:0043933//macromolecular complex subunit organization;GO:0065003//macromolecular complex assembly;GO:0071822//protein complex subunit organization;GO:0009987//cellular process;GO:0071840//cellular…	K17199//Ras and EF-hand domain-containing protein;K17199//Ras and EF-hand domain-containing protein
67881	1.2	2.91	1.27798	1.89616e-10	4.61392e-11	Mdp1	GO:0071704//organic substance metabolic process;GO:1901135//carbohydrate derivative metabolic process;GO:0030389//fructosamine metabolic process;GO:0006040//amino sugar metabolic process;GO:0008152//metabolic process;GO:0031982//vesicle;GO:0005615//extracellular space;GO:0043226//organelle;GO:1903561//extracellular vesicle;GO:0043230//extracellular organelle;GO:0044421//extracellular region part;…	K17619//magnesium-dependent phosphatase 1 [EC:3.1.3.48 3.1.3.-]
258644	4.34	10.52	1.27737	1.82073e-45	1.13229e-46	Olfr1166	GO:0050789//regulation of biological process;GO:0007608//sensory perception of smell;GO:0065007//biological regulation;GO:0050877//nervous system process;GO:0023052//signaling;GO:0050794//regulation of cellular process;GO:0007165//signal transduction;GO:0050896//response to stimulus;GO:0007186//G-protein coupled receptor signaling pathway;GO:0009987//cellular process;GO:0032501//multicellular org…	K04257//olfactory receptor+ko04740//Olfactory transduction;K04257//olfactory receptor+ko04740//Olfactory transduction;K04257//olfactory receptor+ko04740//Olfactory transduction
77352	0.83	2.01	1.27601	9.86264e-16	1.73428e-16	Axdnd1		K04650//nuclear receptor co-repressor 1+ko01522//Endocrine resistance+ko04919//Thyroid hormone signaling pathway+ko05202//Transcriptional misregulation in cancer;K04650//nuclear receptor co-repressor 1+ko01522//Endocrine resistance+ko04919//Thyroid hormone signaling pathway+ko05202//Transcriptional misregulation in cancer
100044193	3.38	8.18	1.27508	2.10619e-48	1.21682e-49	Gm20939	GO:0031323//regulation of cellular metabolic process;GO:2000112//regulation of cellular macromolecule biosynthetic process;GO:0019219//regulation of nucleobase-containing compound metabolic process;GO:1903506//regulation of nucleic acid-templated transcription;GO:0051252//regulation of RNA metabolic process;GO:0019222//regulation of metabolic process;GO:0010468//regulation of gene expression;GO:0…	K09228//KRAB domain-containing zinc finger protein;K09228//KRAB domain-containing zinc finger protein
435772	2.32	5.61	1.27388	7.68439e-09	2.1209e-09	Cnbd1
666532	0.46	1.11	1.27085	6.40921e-07	2.06566e-07	Gm13139	GO:0051252//regulation of RNA metabolic process;GO:0006355//regulation of transcription, DNA-templated;GO:0019222//regulation of metabolic process;GO:0010556//regulation of macromolecule biosynthetic process;GO:0065007//biological regulation;GO:2001141//regulation of RNA biosynthetic process;GO:1903506//regulation of nucleic acid-templated transcription;GO:0019219//regulation of nucleobase-contai…	K09228//KRAB domain-containing zinc finger protein
195531	11.41	27.45	1.26651	2.01156e-230	1.63665e-232	Gm13152	GO:0010556//regulation of macromolecule biosynthetic process;GO:0050789//regulation of biological process;GO:0051252//regulation of RNA metabolic process;GO:0006355//regulation of transcription, DNA-templated;GO:0051171//regulation of nitrogen compound metabolic process;GO:0080090//regulation of primary metabolic process;GO:0050794//regulation of cellular process;GO:0065007//biological regulation…	K09228//KRAB domain-containing zinc finger protein;K09228//KRAB domain-containing zinc finger protein;K09228//KRAB domain-containing zinc finger protein;K09228//KRAB domain-containing zinc finger protein;K09228//KRAB domain-containing zinc finger protein;K09228//KRAB domain-containing zinc finger protein
208151	0.37	0.89	1.26628	2.13984e-14	4.03e-15	Tmem132b	GO:0044425//membrane part;GO:0016020//membrane;GO:0016021//integral component of membrane;GO:0031224//intrinsic component of membrane;	K17599//transmembrane protein 132
216274	0.42	1.01	1.26589	4.37826e-17	7.18526e-18	Cep290	GO:0007163//establishment or maintenance of cell polarity;GO:0048562//embryonic organ morphogenesis;GO:0035295//tube development;GO:0090316//positive regulation of intracellular protein transport;GO:0051223//regulation of protein transport;GO:1901360//organic cyclic compound metabolic process;GO:1903829//positive regulation of cellular protein localization;GO:0009799//specification of symmetry;GO…	K16533//centrosomal protein CEP290;K16533//centrosomal protein CEP290
235047	0.67	1.61	1.26483	1.0516e-05	3.80578e-06	Zfp809	GO:0051252//regulation of RNA metabolic process;GO:0006807//nitrogen compound metabolic process;GO:0009889//regulation of biosynthetic process;GO:0006952//defense response;GO:0006351//transcription, DNA-templated;GO:0019219//regulation of nucleobase-containing compound metabolic process;GO:1903900//regulation of viral life cycle;GO:0044271//cellular nitrogen compound biosynthetic process;GO:00181…	K09228//KRAB domain-containing zinc finger protein;K09228//KRAB domain-containing zinc finger protein;K09228//KRAB domain-containing zinc finger protein;K09228//KRAB domain-containing zinc finger protein
732521	1.21	2.9	1.26105	6.66135e-20	9.53302e-21	Gt(pU21)140Imeg	GO:0045944//positive regulation of transcription from RNA polymerase II promoter;GO:0065007//biological regulation;GO:0031325//positive regulation of cellular metabolic process;GO:0031328//positive regulation of cellular biosynthetic process;GO:0045935//positive regulation of nucleobase-containing compound metabolic process;GO:1903508//positive regulation of nucleic acid-templated transcription;G…	K09228//KRAB domain-containing zinc finger protein;K09228//KRAB domain-containing zinc finger protein
105244402	5.96	14.26	1.25859	7.31042e-40	5.26092e-41	LOC105244402	GO:0019219//regulation of nucleobase-containing compound metabolic process;GO:0010556//regulation of macromolecule biosynthetic process;GO:0080090//regulation of primary metabolic process;GO:0019222//regulation of metabolic process;GO:1903506//regulation of nucleic acid-templated transcription;GO:0031326//regulation of cellular biosynthetic process;GO:0031323//regulation of cellular metabolic pro…	K09228//KRAB domain-containing zinc finger protein;K09228//KRAB domain-containing zinc finger protein;K09228//KRAB domain-containing zinc finger protein;K09228//KRAB domain-containing zinc finger protein;K09228//KRAB domain-containing zinc finger protein;K09228//KRAB domain-containing zinc finger protein
319615	13.1	31.26	1.25475	3.58844e-160	4.685e-162	Zfp944	GO:0060255//regulation of macromolecule metabolic process;GO:2001141//regulation of RNA biosynthetic process;GO:0010468//regulation of gene expression;GO:0051252//regulation of RNA metabolic process;GO:0051173//positive regulation of nitrogen compound metabolic process;GO:0051171//regulation of nitrogen compound metabolic process;GO:0019219//regulation of nucleobase-containing compound metabolic …	K09228//KRAB domain-containing zinc finger protein;K09228//KRAB domain-containing zinc finger protein;K09228//KRAB domain-containing zinc finger protein
20663	0.57	1.36	1.25457	2.66336e-15	4.7707e-16	Sos2	GO:2000973//regulation of pro-B cell differentiation;GO:0032944//regulation of mononuclear cell proliferation;GO:0023056//positive regulation of signaling;GO:0050896//response to stimulus;GO:0045619//regulation of lymphocyte differentiation;GO:0023051//regulation of signaling;GO:0001776//leukocyte homeostasis;GO:0010646//regulation of cell communication;GO:0048518//positive regulation of biologic…	K03099//son of sevenless+ko04630//Jak-STAT signaling pathway+ko04810//Regulation of actin cytoskeleton+ko05223//Non-small cell lung cancer+ko05226//Gastric cancer+ko05225//Hepatocellular carcinoma+ko04320//Dorso-ventral axis formation+ko04510//Focal adhesion+ko04072//Phospholipase D signaling pathway+ko01521//EGFR tyrosine kinase inhibitor resistance+ko01522//Endocrine resistance+ko04917//Prolact…
100862203	28.46	67.75	1.25129	2.27829e-250	1.68124e-252	Gm6712		K09228//KRAB domain-containing zinc finger protein
210135	0.4	0.95	1.24793	5.22078e-07	1.66749e-07	Zfp180	GO:0005488//binding;GO:0097159//organic cyclic compound binding;GO:1901363//heterocyclic compound binding;GO:0003676//nucleic acid binding;	K09228//KRAB domain-containing zinc finger protein;K09228//KRAB domain-containing zinc finger protein
66786	0.51	1.21	1.24644	9.3165e-05	3.8024e-05	Olfr701	GO:0051716//cellular response to stimulus;GO:0007186//G-protein coupled receptor signaling pathway;GO:0007600//sensory perception;GO:0050877//nervous system process;GO:0009987//cellular process;GO:0007165//signal transduction;GO:0007606//sensory perception of chemical stimulus;GO:0050896//response to stimulus;GO:0050789//regulation of biological process;GO:0032501//multicellular organismal proces…	K04257//olfactory receptor+ko04740//Olfactory transduction
74245	5.27	12.5	1.24605	1.18695e-68	4.5292e-70	Ctbs	GO:0009313//oligosaccharide catabolic process;GO:1901135//carbohydrate derivative metabolic process;GO:0006026//aminoglycan catabolic process;GO:1901564//organonitrogen compound metabolic process;GO:0017144//drug metabolic process;GO:0009056//catabolic process;GO:0046348//amino sugar catabolic process;GO:0006807//nitrogen compound metabolic process;GO:0008152//metabolic process;GO:1901575//organi…	K12310//Di-N-acetylchitobiase [EC:3.2.1.-];K12310//Di-N-acetylchitobiase [EC:3.2.1.-]
71409	0.7	1.66	1.24576	3.16438e-16	5.41268e-17	Fmnl2	GO:0009987//cellular process;GO:0030865//cortical cytoskeleton organization;GO:0050794//regulation of cellular process;GO:0071840//cellular component organization or biogenesis;GO:0030029//actin filament-based process;GO:0050793//regulation of developmental process;GO:0006996//organelle organization;GO:0051128//regulation of cellular component organization;GO:0007010//cytoskeleton organization;GO…	K04512//dishevelled associated activator of morphogenesis+ko04310//Wnt signaling pathway;K05741//diaphanous 2+ko04810//Regulation of actin cytoskeleton;K05741//diaphanous 2+ko04810//Regulation of actin cytoskeleton;K04512//dishevelled associated activator of morphogenesis+ko04310//Wnt signaling pathway;K05741//diaphanous 2+ko04810//Regulation of actin cytoskeleton;K04512//dishevelled associated a…
69188	0.27	0.64	1.24511	1.7648e-05	6.5906e-06	Kmt2e	GO:0008152//metabolic process;GO:0048518//positive regulation of biological process;GO:1901576//organic substance biosynthetic process;GO:0002443//leukocyte mediated immunity;GO:0048856//anatomical structure development;GO:0051252//regulation of RNA metabolic process;GO:0051171//regulation of nitrogen compound metabolic process;GO:0007165//signal transduction;GO:0048869//cellular developmental pr…	K09189//histone-lysine N-methyltransferase MLL5 [EC:2.1.1.43]+ko00310//Lysine degradation;K09189//histone-lysine N-methyltransferase MLL5 [EC:2.1.1.43]+ko00310//Lysine degradation
BGI_novel_G000069	1.51	3.57	1.24138	0.000400767	0.000178355	BGI_novel_G000069	GO:0007049//cell cycle;GO:0022414//reproductive process;GO:0009987//cellular process;GO:0051321//meiotic cell cycle;GO:0000003//reproduction;GO:0000795//synaptonemal complex;GO:0044446//intracellular organelle part;GO:0000228//nuclear chromosome;GO:0031981//nuclear lumen;GO:0099086//synaptonemal structure;GO:0031974//membrane-enclosed lumen;GO:0043227//membrane-bounded organelle;GO:0070013//intra…	K19528//synaptonemal complex protein 3+ko03440//Homologous recombination
50768	0.11	0.26	1.24101	0.000342472	0.00015077	Dlc1	GO:0010952//positive regulation of peptidase activity;GO:0032502//developmental process;GO:0030036//actin cytoskeleton organization;GO:0051493//regulation of cytoskeleton organization;GO:0019222//regulation of metabolic process;GO:0008360//regulation of cell shape;GO:0032879//regulation of localization;GO:0032231//regulation of actin filament bundle assembly;GO:0046580//negative regulation of Ras…	K20632//deleted in liver cancer protein;K20632//deleted in liver cancer protein;K20632//deleted in liver cancer protein;K20632//deleted in liver cancer protein
109181	0.81	1.91	1.23758	3.68443e-35	3.00006e-36	Trip11	GO:0048705//skeletal system morphogenesis;GO:0009887//animal organ morphogenesis;GO:0001501//skeletal system development;GO:1901137//carbohydrate derivative biosynthetic process;GO:0060350//endochondral bone morphogenesis;GO:0043170//macromolecule metabolic process;GO:1901576//organic substance biosynthetic process;GO:0048666//neuron development;GO:0048699//generation of neurons;GO:0009653//anato…	K20478//golgin subfamily B member 1;K20478//golgin subfamily B member 1
668620	5.96	14.01	1.23307	1.23482e-80	3.86296e-82	Zfp936	GO:0009628//response to abiotic stimulus;GO:0051252//regulation of RNA metabolic process;GO:0009987//cellular process;GO:1903506//regulation of nucleic acid-templated transcription;GO:0031326//regulation of cellular biosynthetic process;GO:0019222//regulation of metabolic process;GO:0060255//regulation of macromolecule metabolic process;GO:0080090//regulation of primary metabolic process;GO:00346…	K09228//KRAB domain-containing zinc finger protein
72565	0.23	0.54	1.23133	2.09428e-05	7.89894e-06	Uaca	GO:0051336//regulation of hydrolase activity;GO:0043068//positive regulation of programmed cell death;GO:0032270//positive regulation of cellular protein metabolic process;GO:0042347//negative regulation of NF-kappaB import into nucleus;GO:0009416//response to light stimulus;GO:0050896//response to stimulus;GO:0008631//intrinsic apoptotic signaling pathway in response to oxidative stress;GO:00328…	K20478//golgin subfamily B member 1;K20478//golgin subfamily B member 1;K20478//golgin subfamily B member 1
240038	1.19	2.79	1.2293	6.68389e-26	7.4954e-27	Gm4944	GO:0010604//positive regulation of macromolecule metabolic process;GO:2000112//regulation of cellular macromolecule biosynthetic process;GO:0031326//regulation of cellular biosynthetic process;GO:0065007//biological regulation;GO:0050794//regulation of cellular process;GO:0031328//positive regulation of cellular biosynthetic process;GO:0009891//positive regulation of biosynthetic process;GO:00063…	K09228//KRAB domain-containing zinc finger protein
102632483	0.73	1.71	1.22803	1.13065e-09	2.91096e-10	Gm17330		K09228//KRAB domain-containing zinc finger protein
100504950	11.23	26.29	1.22716	3.25605e-151	4.51802e-153	Gm20997		K09228//KRAB domain-containing zinc finger protein;K09228//KRAB domain-containing zinc finger protein
53416	1.54	3.6	1.22507	2.36776e-13	4.72806e-14	Stk39	GO:0042592//homeostatic process;GO:0007165//signal transduction;GO:0008015//blood circulation;GO:0051171//regulation of nitrogen compound metabolic process;GO:0006971//hypotonic response;GO:1903960//negative regulation of anion transmembrane transport;GO:0032844//regulation of homeostatic process;GO:0031401//positive regulation of protein modification process;GO:0051247//positive regulation of pr…	K08835//serine/threonine-protein kinase OSR1/STK39 [EC:2.7.11.1];K08835//serine/threonine-protein kinase OSR1/STK39 [EC:2.7.11.1];K08835//serine/threonine-protein kinase OSR1/STK39 [EC:2.7.11.1]
217653	15.18	35.42	1.22239	7.15724e-261	4.9656e-263	Mis18bp1	GO:0051301//cell division;GO:0007049//cell cycle;GO:0009987//cellular process;GO:0005623//cell;GO:0000777//condensed chromosome kinetochore;GO:0043232//intracellular non-membrane-bounded organelle;GO:0044427//chromosomal part;GO:0031981//nuclear lumen;GO:0043233//organelle lumen;GO:0000794//condensed nuclear chromosome;GO:0044454//nuclear chromosome part;GO:0098687//chromosomal region;GO:0043226/…
329559	0.24	0.56	1.22239	6.58667e-06	2.33888e-06	Zfp335	GO:0051094//positive regulation of developmental process;GO:0060284//regulation of cell development;GO:0009887//animal organ morphogenesis;GO:0120036//plasma membrane bounded cell projection organization;GO:0048699//generation of neurons;GO:0032946//positive regulation of mononuclear cell proliferation;GO:0050865//regulation of cell activation;GO:0051276//chromosome organization;GO:1902275//regul…	K09228//KRAB domain-containing zinc finger protein;K09228//KRAB domain-containing zinc finger protein
75812	0.58	1.35	1.21883	3.16736e-07	9.94656e-08	Tasp1	GO:1903506//regulation of nucleic acid-templated transcription;GO:1901564//organonitrogen compound metabolic process;GO:0006355//regulation of transcription, DNA-templated;GO:0031325//positive regulation of cellular metabolic process;GO:0019219//regulation of nucleobase-containing compound metabolic process;GO:0050789//regulation of biological process;GO:0051254//positive regulation of RNA metabo…	K08657//taspase, threonine aspartase, 1 [EC:3.4.25.-];K08657//taspase, threonine aspartase, 1 [EC:3.4.25.-];K08657//taspase, threonine aspartase, 1 [EC:3.4.25.-];K08657//taspase, threonine aspartase, 1 [EC:3.4.25.-];K08657//taspase, threonine aspartase, 1 [EC:3.4.25.-];K08657//taspase, threonine aspartase, 1 [EC:3.4.25.-]
224170	1.6	3.72	1.21723	3.87856e-35	3.16058e-36	Dzip3	GO:0008152//metabolic process;GO:0036503//ERAD pathway;GO:0051716//cellular response to stimulus;GO:0034976//response to endoplasmic reticulum stress;GO:0010498//proteasomal protein catabolic process;GO:0033554//cellular response to stress;GO:0030968//endoplasmic reticulum unfolded protein response;GO:0070887//cellular response to chemical stimulus;GO:0006950//response to stress;GO:0023052//signa…	K10642//E3 ubiquitin-protein ligase DZIP3 [EC:2.3.2.27];K10642//E3 ubiquitin-protein ligase DZIP3 [EC:2.3.2.27];K10642//E3 ubiquitin-protein ligase DZIP3 [EC:2.3.2.27];K10642//E3 ubiquitin-protein ligase DZIP3 [EC:2.3.2.27]
11798	0.65	1.51	1.21604	5.15381e-18	8.11022e-19	Xiap	GO:0010941//regulation of cell death;GO:0050794//regulation of cellular process;GO:0051172//negative regulation of nitrogen compound metabolic process;GO:0051336//regulation of hydrolase activity;GO:0023052//signaling;GO:1902914//regulation of protein polyubiquitination;GO:0010466//negative regulation of peptidase activity;GO:0052547//regulation of peptidase activity;GO:0050790//regulation of cat…	K04725//E3 ubiquitin-protein ligase XIAP [EC:2.3.2.27]+ko05222//Small cell lung cancer+ko04510//Focal adhesion+ko04214//Apoptosis - fly+ko04215//Apoptosis - multiple species+ko04217//Necroptosis+ko04210//Apoptosis+ko01524//Platinum drug resistance+ko05145//Toxoplasmosis+ko04621//NOD-like receptor signaling pathway+ko04120//Ubiquitin mediated proteolysis+ko05200//Pathways in cancer+ko04064//NF-kap…
414758	2.26	5.24	1.21324	5.2567e-26	5.8883e-27	Zfp950	GO:0048513//animal organ development;GO:0007169//transmembrane receptor protein tyrosine kinase signaling pathway;GO:0072359//circulatory system development;GO:0010468//regulation of gene expression;GO:0023052//signaling;GO:0060021//palate development;GO:0007275//multicellular organism development;GO:0031326//regulation of cellular biosynthetic process;GO:0010556//regulation of macromolecule bios…	K09228//KRAB domain-containing zinc finger protein
23972	0.22	0.51	1.21299	0.000230904	9.93666e-05	Papss2	GO:0034654//nucleobase-containing compound biosynthetic process;GO:0006796//phosphate-containing compound metabolic process;GO:0006082//organic acid metabolic process;GO:1901566//organonitrogen compound biosynthetic process;GO:0009150//purine ribonucleotide metabolic process;GO:0042060//wound healing;GO:0044237//cellular metabolic process;GO:0019693//ribose phosphate metabolic process;GO:0006790/…	K13811//3'-phosphoadenosine 5'-phosphosulfate synthase [EC:2.7.7.4 2.7.1.25]+ko00230//Purine metabolism+ko00920//Sulfur metabolism+ko00261//Monobactam biosynthesis+ko01100//Metabolic pathways+ko00450//Selenocompound metabolism
12140	7.8	18.07	1.21205	1.27285e-22	1.6321e-23	Fabp7	GO:0048513//animal organ development;GO:0032101//regulation of response to external stimulus;GO:0060134//prepulse inhibition;GO:0008283//cell proliferation;GO:0022008//neurogenesis;GO:0021846//cell proliferation in forebrain;GO:0050789//regulation of biological process;GO:0032502//developmental process;GO:0048519//negative regulation of biological process;GO:0007399//nervous system development;GO…	K08756//fatty acid-binding protein 7, brain+ko03320//PPAR signaling pathway;K08756//fatty acid-binding protein 7, brain+ko03320//PPAR signaling pathway
76479	5.18	11.99	1.21081	1.04857e-43	6.82516e-45	Smndc1	GO:0008380//RNA splicing;GO:0016071//mRNA metabolic process;GO:0006139//nucleobase-containing compound metabolic process;GO:1901360//organic cyclic compound metabolic process;GO:0012501//programmed cell death;GO:0006397//mRNA processing;GO:0008219//cell death;GO:0006807//nitrogen compound metabolic process;GO:0006725//cellular aromatic compound metabolic process;GO:0090304//nucleic acid metabolic…	K12839//survival of motor neuron-related-splicing factor 30+ko03040//Spliceosome
12209	0.26	0.6	1.20645	0.000543878	0.000246846	Brs3	GO:0071944//cell periphery;GO:0005623//cell;GO:0005886//plasma membrane;GO:0044464//cell part;GO:0043005//neuron projection;GO:0043025//neuronal cell body;GO:0120025//plasma membrane bounded cell projection;GO:0036477//somatodendritic compartment;GO:0016021//integral component of membrane;GO:0042995//cell projection;GO:0016020//membrane;GO:0097458//neuron part;GO:0044425//membrane part;GO:0031224…	K04170//bombesin-like receptor 3+ko04080//Neuroactive ligand-receptor interaction
329739	0.13	0.3	1.20645	0.000457905	0.000205978	Fam102b
67241	12.1	27.91	1.20578	1.86343e-205	1.77469e-207	Smc6	GO:0051716//cellular response to stimulus;GO:0048869//cellular developmental process;GO:0050789//regulation of biological process;GO:0000725//recombinational repair;GO:0044238//primary metabolic process;GO:0043170//macromolecule metabolic process;GO:0060249//anatomical structure homeostasis;GO:0009987//cellular process;GO:0044237//cellular metabolic process;GO:0016043//cellular component organiza…	K22804//structural maintenance of chromosomes protein 6
BGI_novel_G000526	1.54	3.54	1.20082	1.39479e-08	3.9332e-09	BGI_novel_G000526	GO:0009987//cellular process;GO:0006045//N-acetylglucosamine biosynthetic process;GO:0009058//biosynthetic process;GO:1901135//carbohydrate derivative metabolic process;GO:0006044//N-acetylglucosamine metabolic process;GO:0006040//amino sugar metabolic process;GO:0043436//oxoacid metabolic process;GO:1901073//glucosamine-containing compound biosynthetic process;GO:0044237//cellular metabolic proc…	K01097//N-acylneuraminate-9-phosphatase [EC:3.1.3.29]+ko00520//Amino sugar and nucleotide sugar metabolism+ko01100//Metabolic pathways
105246961	1.35	3.1	1.19931	5.19629e-22	6.79074e-23	LOC105246961	GO:0051171//regulation of nitrogen compound metabolic process;GO:1903506//regulation of nucleic acid-templated transcription;GO:0051252//regulation of RNA metabolic process;GO:0009889//regulation of biosynthetic process;GO:2001141//regulation of RNA biosynthetic process;GO:0031326//regulation of cellular biosynthetic process;GO:2000112//regulation of cellular macromolecule biosynthetic process;GO…	K09228//KRAB domain-containing zinc finger protein;K09228//KRAB domain-containing zinc finger protein;K09228//KRAB domain-containing zinc finger protein
22746	0.58	1.33	1.1973	3.23917e-06	1.11813e-06	Zfp85	GO:0080090//regulation of primary metabolic process;GO:0019222//regulation of metabolic process;GO:1903506//regulation of nucleic acid-templated transcription;GO:0051252//regulation of RNA metabolic process;GO:0006355//regulation of transcription, DNA-templated;GO:0051171//regulation of nitrogen compound metabolic process;GO:2001141//regulation of RNA biosynthetic process;GO:0019219//regulation o…	K09228//KRAB domain-containing zinc finger protein
94246	1.03	2.36	1.19614	6.31197e-25	7.34506e-26	Arid4b	GO:0051704//multi-organism process;GO:0006464//cellular protein modification process;GO:0009058//biosynthetic process;GO:0060008//Sertoli cell differentiation;GO:0045137//development of primary sexual characteristics;GO:0048232//male gamete generation;GO:0061458//reproductive system development;GO:0031326//regulation of cellular biosynthetic process;GO:1901576//organic substance biosynthetic proc…	K19195//AT-rich interactive domain-containing protein 4B;K19195//AT-rich interactive domain-containing protein 4B
23827	0.38	0.87	1.19502	1.83248e-05	6.85142e-06	Bpnt1	GO:0006796//phosphate-containing compound metabolic process;GO:0046486//glycerolipid metabolic process;GO:0006793//phosphorus metabolic process;GO:0046854//phosphatidylinositol phosphorylation;GO:0006650//glycerophospholipid metabolic process;GO:0016310//phosphorylation;GO:0044255//cellular lipid metabolic process;GO:0030258//lipid modification;GO:0044237//cellular metabolic process;GO:0006644//p…	K01082//3'(2'), 5'-bisphosphate nucleotidase [EC:3.1.3.7]+ko00920//Sulfur metabolism+ko01100//Metabolic pathways
14211	2.79	6.38	1.19329	3.9998e-63	1.71042e-64	Smc2	GO:0051383//kinetochore organization;GO:0007076//mitotic chromosome condensation;GO:0071840//cellular component organization or biogenesis;GO:0000003//reproduction;GO:0000280//nuclear division;GO:0140013//meiotic nuclear division;GO:0043933//macromolecular complex subunit organization;GO:0140014//mitotic nuclear division;GO:0022402//cell cycle process;GO:0000278//mitotic cell cycle;GO:0051321//me…	K06674//structural maintenance of chromosome 2;K06674//structural maintenance of chromosome 2
80718	0.21	0.48	1.19265	4.01394e-07	1.26836e-07	Rab27b	GO:0051047//positive regulation of secretion;GO:0051046//regulation of secretion;GO:0045921//positive regulation of exocytosis;GO:0051640//organelle localization;GO:0051050//positive regulation of transport;GO:0016192//vesicle-mediated transport;GO:0051656//establishment of organelle localization;GO:0060627//regulation of vesicle-mediated transport;GO:0051650//establishment of vesicle localizatio…	K07886//Ras-related protein Rab-27B+ko04972//Pancreatic secretion
103266	4.73	10.81	1.19245	3.85719e-72	1.39642e-73	Tmem263	GO:0016020//membrane;GO:0016021//integral component of membrane;GO:0031224//intrinsic component of membrane;GO:0044425//membrane part;
109019	0.95	2.17	1.1917	4.31659e-10	1.0784e-10	Nabp1	GO:0006725//cellular aromatic compound metabolic process;GO:0051726//regulation of cell cycle;GO:0043170//macromolecule metabolic process;GO:0007049//cell cycle;GO:0009314//response to radiation;GO:0044260//cellular macromolecule metabolic process;GO:0044237//cellular metabolic process;GO:0050896//response to stimulus;GO:0045930//negative regulation of mitotic cell cycle;GO:0006310//DNA recombina…	K15280//solute carrier family 35, member C2;K15280//solute carrier family 35, member C2;K15280//solute carrier family 35, member C2
57316	2.56	5.84	1.18982	2.7613e-11	6.31154e-12	C1d	GO:0031326//regulation of cellular biosynthetic process;GO:0006915//apoptotic process;GO:2001141//regulation of RNA biosynthetic process;GO:0046483//heterocycle metabolic process;GO:0032774//RNA biosynthetic process;GO:0009890//negative regulation of biosynthetic process;GO:0071840//cellular component organization or biogenesis;GO:0065007//biological regulation;GO:0006364//rRNA processing;GO:0019…	K12592//exosome complex protein LRP1+ko03018//RNA degradation
192775	0.57	1.3	1.18948	3.03002e-09	8.0552e-10	Kcnh6	GO:0051239//regulation of multicellular organismal process;GO:0006813//potassium ion transport;GO:0044057//regulation of system process;GO:0035637//multicellular organismal signaling;GO:0065007//biological regulation;GO:0042391//regulation of membrane potential;GO:0044085//cellular component biogenesis;GO:0051234//establishment of localization;GO:0023052//signaling;GO:0071822//protein complex sub…	K04909//potassium voltage-gated channel Eag-related subfamily H member 6
211329	0.25	0.57	1.18903	4.99367e-06	1.75306e-06	Ncoa7	GO:0032269//negative regulation of cellular protein metabolic process;GO:0010941//regulation of cell death;GO:0010556//regulation of macromolecule biosynthetic process;GO:0044271//cellular nitrogen compound biosynthetic process;GO:0031328//positive regulation of cellular biosynthetic process;GO:1900408//negative regulation of cellular response to oxidative stress;GO:1900407//regulation of cellula…	K12587//exosome complex component MTR3+ko03018//RNA degradation;K21841//TBC1 domain family member 24
224598	1	2.28	1.18903	3.21506e-13	6.4869e-14	Zfp758	GO:0051171//regulation of nitrogen compound metabolic process;GO:0019222//regulation of metabolic process;GO:0065007//biological regulation;GO:0080090//regulation of primary metabolic process;GO:2000112//regulation of cellular macromolecule biosynthetic process;GO:2001141//regulation of RNA biosynthetic process;GO:0031323//regulation of cellular metabolic process;GO:0050789//regulation of biologi…	K09228//KRAB domain-containing zinc finger protein
213262	0.22	0.5	1.18442	2.98062e-05	1.14431e-05	Fstl5	GO:0005576//extracellular region;GO:0005509//calcium ion binding;GO:0043169//cation binding;GO:0046872//metal ion binding;GO:0043167//ion binding;GO:0005488//binding;	K17341//hemicentin
269152	0.11	0.25	1.18442	0.00011543	4.77372e-05	Kif26b	GO:0060429//epithelium development;GO:0072088//nephron epithelium morphogenesis;GO:0072164//mesonephric tubule development;GO:0035239//tube morphogenesis;GO:0009987//cellular process;GO:0072163//mesonephric epithelium development;GO:0072006//nephron development;GO:0072009//nephron epithelium development;GO:0048513//animal organ development;GO:0048518//positive regulation of biological process;GO:…	K10404//kinesin family member 26
22342	1.25	2.84	1.18396	0.000286689	0.000124874	Lin7b	GO:0006836//neurotransmitter transport;GO:0001505//regulation of neurotransmitter levels;GO:0016192//vesicle-mediated transport;GO:0051179//localization;GO:0033036//macromolecule localization;GO:0045216//cell-cell junction organization;GO:0045197//establishment or maintenance of epithelial cell apical/basal polarity;GO:0007269//neurotransmitter secretion;GO:0051234//establishment of localization;…	K19931//protein lin-7
331188	5.48	12.45	1.1839	5.46306e-77	1.81585e-78	Zfp781	GO:1903506//regulation of nucleic acid-templated transcription;GO:0009889//regulation of biosynthetic process;GO:0019219//regulation of nucleobase-containing compound metabolic process;GO:0010468//regulation of gene expression;GO:0050789//regulation of biological process;GO:0050794//regulation of cellular process;GO:0051171//regulation of nitrogen compound metabolic process;GO:0006355//regulation…	K09228//KRAB domain-containing zinc finger protein
100040944	3.75	8.5	1.18057	1.35917e-39	9.85838e-41	Gm3055	GO:0010468//regulation of gene expression;GO:0080090//regulation of primary metabolic process;GO:0050794//regulation of cellular process;GO:1903506//regulation of nucleic acid-templated transcription;GO:0031326//regulation of cellular biosynthetic process;GO:0006355//regulation of transcription, DNA-templated;GO:0019219//regulation of nucleobase-containing compound metabolic process;GO:0019222//r…	K09228//KRAB domain-containing zinc finger protein;K09228//KRAB domain-containing zinc finger protein
17859	0.76	1.72	1.17834	2.40139e-06	8.15306e-07	Mxi1	GO:0051252//regulation of RNA metabolic process;GO:0031324//negative regulation of cellular metabolic process;GO:1901360//organic cyclic compound metabolic process;GO:0044260//cellular macromolecule metabolic process;GO:0080090//regulation of primary metabolic process;GO:0010467//gene expression;GO:0006355//regulation of transcription, DNA-templated;GO:0009059//macromolecule biosynthetic process;…	K09114//MAX dimerization protein
102637189	4.17	9.43	1.17721	3.99141e-21	5.4251e-22	Gm34066
BGI_novel_G000274	2.35	5.31	1.17605	5.82784e-10	1.46698e-10	BGI_novel_G000274	GO:0071702//organic substance transport;GO:0015833//peptide transport;GO:0051234//establishment of localization;GO:0071704//organic substance metabolic process;GO:0006950//response to stress;GO:0009314//response to radiation;GO:0044237//cellular metabolic process;GO:0006913//nucleocytoplasmic transport;GO:0017038//protein import;GO:0006810//transport;GO:0033554//cellular response to stress;GO:003…
224694	8.47	19.12	1.17465	1.03113e-72	3.66796e-74	Zfp81	GO:0010556//regulation of macromolecule biosynthetic process;GO:0031326//regulation of cellular biosynthetic process;GO:0010468//regulation of gene expression;GO:0009889//regulation of biosynthetic process;GO:2000112//regulation of cellular macromolecule biosynthetic process;GO:1903506//regulation of nucleic acid-templated transcription;GO:0051252//regulation of RNA metabolic process;GO:0060255//…	K09228//KRAB domain-containing zinc finger protein
381112	0.39	0.88	1.17403	3.11063e-07	9.75272e-08	Arhgef33	GO:0050794//regulation of cellular process;GO:0048583//regulation of response to stimulus;GO:0009966//regulation of signal transduction;GO:0051056//regulation of small GTPase mediated signal transduction;GO:0050789//regulation of biological process;GO:1902531//regulation of intracellular signal transduction;GO:0035023//regulation of Rho protein signal transduction;GO:0065007//biological regulatio…	K13171//serine/arginine repetitive matrix protein 1+ko03013//RNA transport+ko03015//mRNA surveillance pathway;K13171//serine/arginine repetitive matrix protein 1+ko03013//RNA transport+ko03015//mRNA surveillance pathway
71900	0.55	1.23	1.16115	1.20597e-13	2.37086e-14	Tmem106b	GO:0048468//cell development;GO:0000902//cell morphogenesis;GO:0080171//lytic vacuole organization;GO:0051962//positive regulation of nervous system development;GO:0007040//lysosome organization;GO:0007033//vacuole organization;GO:0051179//localization;GO:0006996//organelle organization;GO:0007041//lysosomal transport;GO:0051640//organelle localization;GO:0051234//establishment of localization;GO…
235386	0.17	0.38	1.16046	0.000321791	0.000141178	Hykk	GO:0005623//cell;GO:0044424//intracellular part;GO:0044464//cell part;GO:0005737//cytoplasm;GO:0005622//intracellular;GO:0016773//phosphotransferase activity, alcohol group as acceptor;GO:0016740//transferase activity;GO:0016772//transferase activity, transferring phosphorus-containing groups;GO:0003824//catalytic activity;GO:0016301//kinase activity;	K18201//hydroxylysine kinase [EC:2.7.1.81]+ko00310//Lysine degradation+ko01100//Metabolic pathways
71801	0.9	2.01	1.1592	8.57765e-11	2.03256e-11	Plekhf2	GO:0045184//establishment of protein localization;GO:0042886//amide transport;GO:0006810//transport;GO:0015833//peptide transport;GO:0015031//protein transport;GO:0008104//protein localization;GO:0051179//localization;GO:0033036//macromolecule localization;GO:0071702//organic substance transport;GO:0071705//nitrogen compound transport;GO:0051234//establishment of localization;GO:0044464//cell par…	K05724//FYVE, RhoGEF and PH domain containing 5/6
100502880	2.86	6.36	1.15301	2.81734e-29	2.8129e-30	Gm19428	GO:0019222//regulation of metabolic process;GO:0050789//regulation of biological process;GO:0010556//regulation of macromolecule biosynthetic process;GO:0010468//regulation of gene expression;GO:2001141//regulation of RNA biosynthetic process;GO:0019219//regulation of nucleobase-containing compound metabolic process;GO:2000112//regulation of cellular macromolecule biosynthetic process;GO:0051171/…	K09228//KRAB domain-containing zinc finger protein;K09228//KRAB domain-containing zinc finger protein
67636	0.69	1.53	1.14886	5.64788e-05	2.24526e-05	Lyrm5	GO:0008152//metabolic process;GO:0006091//generation of precursor metabolites and energy;GO:0055114//oxidation-reduction process;GO:0009987//cellular process;GO:0022900//electron transport chain;GO:0044237//cellular metabolic process;GO:0045333//cellular respiration;GO:0015980//energy derivation by oxidation of organic compounds;GO:0022904//respiratory electron transport chain;GO:0043231//intrace…	K11846//ubiquitin carboxyl-terminal hydrolase 18/41 [EC:3.4.19.12];K00560//thymidylate synthase [EC:2.1.1.45]+ko00670//One carbon pool by folate+ko01523//Antifolate resistance+ko00240//Pyrimidine metabolism+ko01100//Metabolic pathways;K20301//trafficking protein particle complex subunit 2;K11846//ubiquitin carboxyl-terminal hydrolase 18/41 [EC:3.4.19.12];K00560//thymidylate synthase [EC:2.1.1.45]…
64454	0.74	1.64	1.1481	4.03424e-06	1.40454e-06	Slc5a4b	GO:0015758//glucose transport;GO:0051179//localization;GO:0008643//carbohydrate transport;GO:0030001//metal ion transport;GO:0035428//hexose transmembrane transport;GO:0008645//hexose transport;GO:0055085//transmembrane transport;GO:0015749//monosaccharide transport;GO:0006810//transport;GO:0051234//establishment of localization;GO:1904659//glucose transmembrane transport;GO:0006814//sodium ion t…	K14384//solute carrier family 5 (low affinity sodium-glucose cotransporter), member 4
22720	2.24	4.96	1.14684	3.94994e-33	3.45542e-34	Zfp62	GO:0034645//cellular macromolecule biosynthetic process;GO:0050794//regulation of cellular process;GO:0010556//regulation of macromolecule biosynthetic process;GO:0046483//heterocycle metabolic process;GO:0019222//regulation of metabolic process;GO:0009889//regulation of biosynthetic process;GO:0090304//nucleic acid metabolic process;GO:0006725//cellular aromatic compound metabolic process;GO:003…	K09228//KRAB domain-containing zinc finger protein
69504	106.76	236.3	1.14625	0	0	Zfp932	GO:2000112//regulation of cellular macromolecule biosynthetic process;GO:0080090//regulation of primary metabolic process;GO:0045892//negative regulation of transcription, DNA-templated;GO:0034645//cellular macromolecule biosynthetic process;GO:0019438//aromatic compound biosynthetic process;GO:0019219//regulation of nucleobase-containing compound metabolic process;GO:0051252//regulation of RNA m…	K09228//KRAB domain-containing zinc finger protein
17155	1.39	3.07	1.14315	9.46448e-21	1.3061e-21	Man1a	GO:0009987//cellular process;GO:0043413//macromolecule glycosylation;GO:1901566//organonitrogen compound biosynthetic process;GO:0006464//cellular protein modification process;GO:0070085//glycosylation;GO:1901576//organic substance biosynthetic process;GO:0071704//organic substance metabolic process;GO:0043170//macromolecule metabolic process;GO:1901564//organonitrogen compound metabolic process;…	K01230//mannosyl-oligosaccharide alpha-1,2-mannosidase [EC:3.2.1.113]+ko04141//Protein processing in endoplasmic reticulum+ko00510//N-Glycan biosynthesis+ko01100//Metabolic pathways;K01230//mannosyl-oligosaccharide alpha-1,2-mannosidase [EC:3.2.1.113]+ko04141//Protein processing in endoplasmic reticulum+ko00510//N-Glycan biosynthesis+ko01100//Metabolic pathways
30049	0.34	0.75	1.14136	0.000243878	0.000105258	Scd3	GO:1901576//organic substance biosynthetic process;GO:0044249//cellular biosynthetic process;GO:0009058//biosynthetic process;GO:1903966//monounsaturated fatty acid biosynthetic process;GO:0044283//small molecule biosynthetic process;GO:0008152//metabolic process;GO:0071704//organic substance metabolic process;GO:0072330//monocarboxylic acid biosynthetic process;GO:0008610//lipid biosynthetic pro…	K00507//stearoyl-CoA desaturase (Delta-9 desaturase) [EC:1.14.19.1]+ko03320//PPAR signaling pathway+ko01040//Biosynthesis of unsaturated fatty acids+ko04212//Longevity regulating pathway - worm+ko04152//AMPK signaling pathway+ko01212//Fatty acid metabolism;K00507//stearoyl-CoA desaturase (Delta-9 desaturase) [EC:1.14.19.1]+ko03320//PPAR signaling pathway+ko01040//Biosynthesis of unsaturated fatty…
666253	1.72	3.79	1.13979	1.19771e-07	3.629e-08	Gm8005
170719	1.91	4.2	1.13682	4.01498e-24	4.84938e-25	Oxr1	GO:0048583//regulation of response to stimulus;GO:0032268//regulation of cellular protein metabolic process;GO:0048523//negative regulation of cellular process;GO:0007626//locomotory behavior;GO:1903204//negative regulation of oxidative stress-induced neuron death;GO:0030534//adult behavior;GO:0009987//cellular process;GO:0050896//response to stimulus;GO:1903203//regulation of oxidative stress-in…	K12587//exosome complex component MTR3+ko03018//RNA degradation;K21841//TBC1 domain family member 24;K12587//exosome complex component MTR3+ko03018//RNA degradation;K21841//TBC1 domain family member 24;K12587//exosome complex component MTR3+ko03018//RNA degradation;K21841//TBC1 domain family member 24;K12587//exosome complex component MTR3+ko03018//RNA degradation;K21841//TBC1 domain family membe…
BGI_novel_G000227	0.89	1.95	1.1316	4.89786e-12	1.06267e-12	BGI_novel_G000227		K12822//RNA-binding protein 25+ko03040//Spliceosome
77134	1.05	2.3	1.13124	9.80927e-11	2.33554e-11	Hnrnpa0	GO:0048519//negative regulation of biological process;GO:0010628//positive regulation of gene expression;GO:0010608//posttranscriptional regulation of gene expression;GO:0009605//response to external stimulus;GO:0009894//regulation of catabolic process;GO:0019219//regulation of nucleobase-containing compound metabolic process;GO:0080090//regulation of primary metabolic process;GO:0009607//respons…	K12894//heterogeneous nuclear ribonucleoprotein A0
94176	0.27	0.59	1.12776	3.50254e-06	1.21324e-06	Dock2	GO:0048583//regulation of response to stimulus;GO:0048731//system development;GO:0048513//animal organ development;GO:0006810//transport;GO:0050794//regulation of cellular process;GO:0002277//myeloid dendritic cell activation involved in immune response;GO:0002521//leukocyte differentiation;GO:0051056//regulation of small GTPase mediated signal transduction;GO:0002252//immune effector process;GO:…	K12367//dedicator of cytokinesis protein 2+ko04666//Fc gamma R-mediated phagocytosis+ko04062//Chemokine signaling pathway;K12367//dedicator of cytokinesis protein 2+ko04666//Fc gamma R-mediated phagocytosis+ko04062//Chemokine signaling pathway
20955	14.55	31.76	1.12619	6.78309e-129	1.1979e-130	Vamp7	GO:0036230//granulocyte activation;GO:0051588//regulation of neurotransmitter transport;GO:0051960//regulation of nervous system development;GO:0002323//natural killer cell activation involved in immune response;GO:1903305//regulation of regulated secretory pathway;GO:0071702//organic substance transport;GO:0002447//eosinophil mediated immunity;GO:0010324//membrane invagination;GO:0065007//biolog…	K08515//vesicle-associated membrane protein 7+ko04130//SNARE interactions in vesicular transport
432720	1.04	2.27	1.12611	2.79555e-05	1.0685e-05	Akr1c19	GO:0003824//catalytic activity;GO:0016491//oxidoreductase activity;	K13374//aldo-keto reductase family 1 member C13 [EC:1.1.1.218];K04119//aldo-keto reductase family 1 member C3 [EC:1.1.1.51 1.1.1.188 1.1.1.213 1.1.1.357]+ko04913//Ovarian steroidogenesis+ko00590//Arachidonic acid metabolism+ko00140//Steroid hormone biosynthesis+ko01100//Metabolic pathways+ko00790//Folate biosynthesis
240641	15.78	34.34	1.12179	0	0	Kif20b	GO:0033157//regulation of intracellular protein transport;GO:0032879//regulation of localization;GO:0051960//regulation of nervous system development;GO:2001224//positive regulation of neuron migration;GO:0065007//biological regulation;GO:0014020//primary neural tube formation;GO:1904951//positive regulation of establishment of protein localization;GO:0048598//embryonic morphogenesis;GO:0060606//…	K10402//kinesin family member 20;K10402//kinesin family member 20;K10402//kinesin family member 20
67684	18.62	40.49	1.12071	4.37166e-125	7.8858e-127	Luc7l3	GO:0000398//mRNA splicing, via spliceosome;GO:0006376//mRNA splice site selection;GO:0016070//RNA metabolic process;GO:0071840//cellular component organization or biogenesis;GO:0006725//cellular aromatic compound metabolic process;GO:0006396//RNA processing;GO:0008152//metabolic process;GO:1901360//organic cyclic compound metabolic process;GO:0016071//mRNA metabolic process;GO:0006397//mRNA proce…	K13212//RNA-binding protein Luc7-like 2;K13212//RNA-binding protein Luc7-like 2
73254	2.08	4.51	1.11654	4.24557e-37	3.28024e-38	Ccdc18		K20478//golgin subfamily B member 1;K13107//RNA-binding motif protein, X-linked 2;K20478//golgin subfamily B member 1
19056	2.5	5.42	1.11636	3.4552e-26	3.8442e-27	Ppp3cb	GO:1990138//neuron projection extension;GO:0065008//regulation of biological quality;GO:0048812//neuron projection morphogenesis;GO:0051222//positive regulation of protein transport;GO:0045944//positive regulation of transcription from RNA polymerase II promoter;GO:0040007//growth;GO:0007613//memory;GO:0048016//inositol phosphate-mediated signaling;GO:0017156//calcium ion regulated exocytosis;GO:…	K04348//serine/threonine-protein phosphatase 2B catalytic subunit [EC:3.1.3.16]+ko04360//Axon guidance+ko05014//Amyotrophic lateral sclerosis (ALS)+ko04022//cGMP-PKG signaling pathway+ko04020//Calcium signaling pathway+ko04218//Cellular senescence+ko04650//Natural killer cell mediated cytotoxicity+ko04658//Th1 and Th2 cell differentiation+ko04659//Th17 cell differentiation+ko04380//Osteoclast dif…
218639	5.45	11.81	1.11568	4.58051e-62	1.99052e-63	Arl15	GO:0007154//cell communication;GO:0007165//signal transduction;GO:0050794//regulation of cellular process;GO:0023052//signaling;GO:0065007//biological regulation;GO:0050789//regulation of biological process;GO:0035556//intracellular signal transduction;GO:0007264//small GTPase mediated signal transduction;GO:0051716//cellular response to stimulus;GO:0050896//response to stimulus;GO:0009987//cellu…	K17201//ADP-ribosylation factor-like protein 15
258984	3.34	7.21	1.11015	1.4441e-10	3.48296e-11	Olfr1257	GO:0050906//detection of stimulus involved in sensory perception;GO:0050789//regulation of biological process;GO:0050794//regulation of cellular process;GO:0042221//response to chemical;GO:0009593//detection of chemical stimulus;GO:0050907//detection of chemical stimulus involved in sensory perception;GO:0009987//cellular process;GO:0051716//cellular response to stimulus;GO:0007186//G-protein cou…	K04257//olfactory receptor+ko04740//Olfactory transduction
BGI_novel_G000486	1.84	3.97	1.10943	2.61634e-09	6.92574e-10	BGI_novel_G000486
382252	0.67	1.44	1.10384	2.0444e-08	5.83856e-09	A830080D01Rik	GO:0043229//intracellular organelle;GO:0005737//cytoplasm;GO:0005622//intracellular;GO:0043227//membrane-bounded organelle;GO:0043226//organelle;GO:0044424//intracellular part;GO:0005623//cell;GO:0005739//mitochondrion;GO:0044464//cell part;GO:0044444//cytoplasmic part;GO:0043231//intracellular membrane-bounded organelle;	K13087//bcl2 associated transcription factor 1;K13112//thyroid hormone receptor-associated protein 3
67345	1.14	2.45	1.10375	3.06714e-13	6.1807e-14	Herc4	GO:1901564//organonitrogen compound metabolic process;GO:0006807//nitrogen compound metabolic process;GO:0006464//cellular protein modification process;GO:0032504//multicellular organism reproduction;GO:0071704//organic substance metabolic process;GO:0048609//multicellular organismal reproductive process;GO:0007276//gamete generation;GO:0019953//sexual reproduction;GO:0043170//macromolecule metab…	K10615//E3 ubiquitin-protein ligase HERC4 [EC:2.3.2.26]+ko04120//Ubiquitin mediated proteolysis;K10615//E3 ubiquitin-protein ligase HERC4 [EC:2.3.2.26]+ko04120//Ubiquitin mediated proteolysis;K10615//E3 ubiquitin-protein ligase HERC4 [EC:2.3.2.26]+ko04120//Ubiquitin mediated proteolysis;K10615//E3 ubiquitin-protein ligase HERC4 [EC:2.3.2.26]+ko04120//Ubiquitin mediated proteolysis;K10615//E3 ubiq…
98376	0.49	1.05	1.09954	4.4933e-05	1.7602e-05	Gorab	GO:0070925//organelle assembly;GO:0045880//positive regulation of smoothened signaling pathway;GO:0031069//hair follicle morphogenesis;GO:0051094//positive regulation of developmental process;GO:0048513//animal organ development;GO:0032502//developmental process;GO:0060429//epithelium development;GO:0051960//regulation of nervous system development;GO:0007275//multicellular organism development;G…	K19748//RAB6-interacting golgin+ko04115//p53 signaling pathway
60411	38.04	81.43	1.09804	3.12668e-104	7.17826e-106	Cenpk	GO:0009891//positive regulation of biosynthetic process;GO:0065007//biological regulation;GO:2000112//regulation of cellular macromolecule biosynthetic process;GO:0009893//positive regulation of metabolic process;GO:0045944//positive regulation of transcription from RNA polymerase II promoter;GO:0045893//positive regulation of transcription, DNA-templated;GO:0051171//regulation of nitrogen compou…	K11503//centromere protein K;K11503//centromere protein K;K11503//centromere protein K
BGI_novel_G000694	13.3	28.45	1.097	9.30702e-24	1.14173e-24	BGI_novel_G000694	GO:0071840//cellular component organization or biogenesis;GO:0016043//cellular component organization;GO:0043623//cellular protein complex assembly;GO:0043933//macromolecular complex subunit organization;GO:0070271//protein complex biogenesis;GO:0034622//cellular macromolecular complex assembly;GO:0044085//cellular component biogenesis;GO:0006457//protein folding;GO:0006461//protein complex assem…	K17292//tubulin-specific chaperone A
229776	1.44	3.08	1.09686	8.53347e-06	3.06516e-06	Cdc14a	GO:0065007//biological regulation;GO:0030030//cell projection organization;GO:0007346//regulation of mitotic cell cycle;GO:0071850//mitotic cell cycle arrest;GO:1901987//regulation of cell cycle phase transition;GO:0007052//mitotic spindle organization;GO:0140014//mitotic nuclear division;GO:0048519//negative regulation of biological process;GO:0007088//regulation of mitotic nuclear division;GO:0…	K06639//cell division cycle 14 [EC:3.1.3.16 3.1.3.48]+ko04110//Cell cycle;K06639//cell division cycle 14 [EC:3.1.3.16 3.1.3.48]+ko04110//Cell cycle
20750	3.88	8.29	1.09532	4.50062e-18	7.06246e-19	Spp1	GO:2001141//regulation of RNA biosynthetic process;GO:0022604//regulation of cell morphogenesis;GO:0080134//regulation of response to stress;GO:0032870//cellular response to hormone stimulus;GO:0006355//regulation of transcription, DNA-templated;GO:1901361//organic cyclic compound catabolic process;GO:0051046//regulation of secretion;GO:0042221//response to chemical;GO:0046850//regulation of bone…	K06250//secreted phosphoprotein 1+ko04512//ECM-receptor interaction+ko04510//Focal adhesion+ko04620//Toll-like receptor signaling pathway+ko04371//Apelin signaling pathway+ko04151//PI3K-Akt signaling pathway+ko05165//Human papillomavirus infection;K06250//secreted phosphoprotein 1+ko04512//ECM-receptor interaction+ko04510//Focal adhesion+ko04620//Toll-like receptor signaling pathway+ko04371//Apel…
14265	1.77	3.78	1.09464	3.08752e-26	3.42928e-27	Fmr1	GO:0044093//positive regulation of molecular function;GO:0060148//positive regulation of posttranscriptional gene silencing;GO:0080134//regulation of response to stress;GO:0048518//positive regulation of biological process;GO:0010638//positive regulation of organelle organization;GO:2000637//positive regulation of gene silencing by miRNA;GO:1905214//regulation of RNA binding;GO:0051252//regulatio…	K15516//fragile X mental retardation protein+ko03013//RNA transport
545637	1.3	2.77	1.09137	3.23896e-06	1.11826e-06	Gm11758
14314	0.23	0.49	1.09115	0.000917559	0.000429178	Fstl1	GO:0031667//response to nutrient levels;GO:0050896//response to stimulus;GO:0009605//response to external stimulus;GO:0042594//response to starvation;GO:0006950//response to stress;GO:0009991//response to extracellular stimulus;GO:1903561//extracellular vesicle;GO:0044421//extracellular region part;GO:0005615//extracellular space;GO:0031982//vesicle;GO:0043227//membrane-bounded organelle;GO:00432…	K06254//agrin+ko04512//ECM-receptor interaction
110835	0.63	1.34	1.08881	1.84614e-06	6.21086e-07	Chrna5	GO:0007268//chemical synaptic transmission;GO:0007154//cell communication;GO:0006812//cation transport;GO:0034220//ion transmembrane transport;GO:0035094//response to nicotine;GO:0007610//behavior;GO:0042493//response to drug;GO:0042221//response to chemical;GO:0007274//neuromuscular synaptic transmission;GO:0051179//localization;GO:0006810//transport;GO:0098655//cation transmembrane transport;GO…	K04807//nicotinic acetylcholine receptor alpha-5+ko04080//Neuroactive ligand-receptor interaction
17035	1.43	3.04	1.08806	1.0062e-05	3.6345e-06	Lxn	GO:0050965//detection of temperature stimulus involved in sensory perception of pain;GO:0006950//response to stress;GO:0009628//response to abiotic stimulus;GO:0032501//multicellular organismal process;GO:0009266//response to temperature stimulus;GO:0051606//detection of stimulus;GO:0050961//detection of temperature stimulus involved in sensory perception;GO:0009581//detection of external stimulu…
BGI_novel_G000190	0.57	1.21	1.08597	9.48641e-05	3.87474e-05	BGI_novel_G000190	GO:0071840//cellular component organization or biogenesis;GO:0048524//positive regulation of viral process;GO:0034641//cellular nitrogen compound metabolic process;GO:0050789//regulation of biological process;GO:0048518//positive regulation of biological process;GO:0043903//regulation of symbiosis, encompassing mutualism through parasitism;GO:0006367//transcription initiation from RNA polymerase …	K03135//transcription initiation factor TFIID subunit 11+ko03022//Basal transcription factors
241950	0.82	1.74	1.08539	1.57064e-06	5.23446e-07	Bbs12	GO:0044782//cilium organization;GO:0009987//cellular process;GO:0070271//protein complex biogenesis;GO:0065007//biological regulation;GO:0001894//tissue homeostasis;GO:0007018//microtubule-based movement;GO:0044085//cellular component biogenesis;GO:0099118//microtubule-based protein transport;GO:0048871//multicellular organismal homeostasis;GO:0051093//negative regulation of developmental process…	K19402//Bardet-Biedl syndrome 12 protein
102635552	6.99	14.83	1.08515	3.45405e-108	7.42876e-110	Gm32856		K09228//KRAB domain-containing zinc finger protein;K09228//KRAB domain-containing zinc finger protein
102639229	48.95	103.84	1.08498	0	0	Gm35588		K09228//KRAB domain-containing zinc finger protein
67298	0.33	0.7	1.08489	4.5274e-07	1.43832e-07	Gprasp1	GO:0048585//negative regulation of response to stimulus;GO:0016192//vesicle-mediated transport;GO:0009057//macromolecule catabolic process;GO:0048519//negative regulation of biological process;GO:0044237//cellular metabolic process;GO:0050794//regulation of cellular process;GO:0006810//transport;GO:0023051//regulation of signaling;GO:0051234//establishment of localization;GO:0048583//regulation o…	K04574//neurofilament heavy polypeptide+ko05014//Amyotrophic lateral sclerosis (ALS)
BGI_novel_G000106	0.99	2.1	1.08489	6.90186e-06	2.45472e-06	BGI_novel_G000106	GO:0006081//cellular aldehyde metabolic process;GO:0005975//carbohydrate metabolic process;GO:0071704//organic substance metabolic process;GO:0006739//NADP metabolic process;GO:0046483//heterocycle metabolic process;GO:0019322//pentose biosynthetic process;GO:0032787//monocarboxylic acid metabolic process;GO:0051186//cofactor metabolic process;GO:0006732//coenzyme metabolic process;GO:0005996//mo…	K00033//6-phosphogluconate dehydrogenase [EC:1.1.1.44 1.1.1.343]+ko01200//Carbon metabolism+ko00480//Glutathione metabolism+ko00030//Pentose phosphate pathway+ko01100//Metabolic pathways
74670	5.22	11.07	1.08453	1.15418e-45	7.0903e-47	Zfp943	GO:0019222//regulation of metabolic process;GO:0010468//regulation of gene expression;GO:0051171//regulation of nitrogen compound metabolic process;GO:0009889//regulation of biosynthetic process;GO:0051252//regulation of RNA metabolic process;GO:0006355//regulation of transcription, DNA-templated;GO:0080090//regulation of primary metabolic process;GO:2001141//regulation of RNA biosynthetic proces…	K09228//KRAB domain-containing zinc finger protein
360216	10.42	22.06	1.08208	5.45787e-92	1.50087e-93	Zranb1	GO:0071947//protein deubiquitination involved in ubiquitin-dependent protein catabolic process;GO:0048518//positive regulation of biological process;GO:0016477//cell migration;GO:1901565//organonitrogen compound catabolic process;GO:0050896//response to stimulus;GO:1990168//protein K33-linked deubiquitination;GO:0044257//cellular protein catabolic process;GO:1901575//organic substance catabolic p…	K11862//ubiquitin thioesterase ZRANB1 [EC:3.4.19.12]
244421	0.77	1.63	1.08194	1.09608e-10	2.61732e-11	Lonrf1	GO:0046872//metal ion binding;GO:0043169//cation binding;GO:0043167//ion binding;GO:0005488//binding;	K20804//E3 ubiquitin-protein ligase RNF34 [EC:2.3.2.31];K21958//extracellular serine/threonine protein kinase FAM20C [EC:2.7.11.1]
622434	3.17	6.7	1.07968	7.90955e-26	8.8998e-27	Arhgef26	GO:0031529//ruffle organization;GO:0045446//endothelial cell differentiation;GO:0048468//cell development;GO:0003382//epithelial cell morphogenesis;GO:0000904//cell morphogenesis involved in differentiation;GO:0044085//cellular component biogenesis;GO:0097178//ruffle assembly;GO:0010646//regulation of cell communication;GO:0009987//cellular process;GO:0048856//anatomical structure development;GO:…	K13744//Rho guanine nucleotide exchange factor 26+ko05100//Bacterial invasion of epithelial cells;K13744//Rho guanine nucleotide exchange factor 26+ko05100//Bacterial invasion of epithelial cells
236749	5.66	11.96	1.07934	3.41351e-26	3.79566e-27	Gm4907	GO:0048523//negative regulation of cellular process;GO:0065007//biological regulation;GO:0050794//regulation of cellular process;GO:0042127//regulation of cell proliferation;GO:0008285//negative regulation of cell proliferation;GO:0050789//regulation of biological process;GO:0048519//negative regulation of biological process;GO:0032991//macromolecular complex;GO:0043229//intracellular organelle;G…	K04511//prickle+ko04310//Wnt signaling pathway;K04511//prickle+ko04310//Wnt signaling pathway;K04511//prickle+ko04310//Wnt signaling pathway
666468	6.39	13.46	1.07479	8.43792e-44	5.46562e-45	Atg4a	GO:0008104//protein localization;GO:0015833//peptide transport;GO:0044260//cellular macromolecule metabolic process;GO:0019538//protein metabolic process;GO:0070925//organelle assembly;GO:0007033//vacuole organization;GO:0051697//protein delipidation;GO:0051649//establishment of localization in cell;GO:0044804//autophagy of nucleus;GO:1901576//organic substance biosynthetic process;GO:0071705//ni…	K08342//cysteine protease ATG4 [EC:3.4.22.-]+ko04140//Autophagy - animal+ko04136//Autophagy - other;K08342//cysteine protease ATG4 [EC:3.4.22.-]+ko04140//Autophagy - animal+ko04136//Autophagy - other;K08342//cysteine protease ATG4 [EC:3.4.22.-]+ko04140//Autophagy - animal+ko04136//Autophagy - other
83768	1.04	2.19	1.07435	2.68469e-06	9.16402e-07	Dpp7	GO:0008152//metabolic process;GO:1901564//organonitrogen compound metabolic process;GO:0044238//primary metabolic process;GO:0071704//organic substance metabolic process;GO:0006508//proteolysis;GO:0043170//macromolecule metabolic process;GO:0006807//nitrogen compound metabolic process;GO:0019538//protein metabolic process;GO:0044424//intracellular part;GO:0043230//extracellular organelle;GO:19035…	K01276//dipeptidyl-peptidase II [EC:3.4.14.2]
76594	1.16	2.44	1.07276	4.21326e-20	5.97908e-21	Dnajc18	GO:0044425//membrane part;GO:0031224//intrinsic component of membrane;GO:0016020//membrane;GO:0016021//integral component of membrane;	K09538//DnaJ homolog subfamily C member 18;K09538//DnaJ homolog subfamily C member 18;K09538//DnaJ homolog subfamily C member 18;K09538//DnaJ homolog subfamily C member 18
449000	28.03	58.95	1.07252	3.1063e-217	2.76246e-219	Zfp960	GO:0006355//regulation of transcription, DNA-templated;GO:1903506//regulation of nucleic acid-templated transcription;GO:0050794//regulation of cellular process;GO:0060255//regulation of macromolecule metabolic process;GO:0019219//regulation of nucleobase-containing compound metabolic process;GO:0080090//regulation of primary metabolic process;GO:0010468//regulation of gene expression;GO:2000112/…	K09228//KRAB domain-containing zinc finger protein;K09228//KRAB domain-containing zinc finger protein
631784	8.84	18.59	1.07241	8.01362e-38	6.05002e-39	Gm7073
BGI_novel_G000617	0.82	1.72	1.06871	0.000289784	0.00012624	BGI_novel_G000617		K09187//histone-lysine N-methyltransferase MLL2 [EC:2.1.1.43]+ko04934//Cushing's syndrome+ko00310//Lysine degradation
108167601	9.73	20.37	1.06593	4.84772e-31	4.54044e-32	LOC108167601		K09228//KRAB domain-containing zinc finger protein
BGI_novel_G000431	0.76	1.59	1.06496	0.00013777	5.74628e-05	BGI_novel_G000431	GO:0033005//positive regulation of mast cell activation;GO:0065007//biological regulation;GO:0002682//regulation of immune system process;GO:0050865//regulation of cell activation;GO:0002684//positive regulation of immune system process;GO:0050867//positive regulation of cell activation;GO:0002696//positive regulation of leukocyte activation;GO:0033003//regulation of mast cell activation;GO:00507…	K20413//hepatitis A virus cellular receptor 1
94353	5.79	12.11	1.06456	3.30926e-15	5.95896e-16	Hmgn3	GO:0006325//chromatin organization;GO:0006355//regulation of transcription, DNA-templated;GO:0010628//positive regulation of gene expression;GO:0050708//regulation of protein secretion;GO:0045893//positive regulation of transcription, DNA-templated;GO:0051090//regulation of DNA binding transcription factor activity;GO:0016569//covalent chromatin modification;GO:0031328//positive regulation of cel…	K11301//high-mobility group nucleosome-binding domain-containing protein 3
100121	0.57	1.19	1.06193	3.35712e-06	1.16202e-06	Tdrd7	GO:0048468//cell development;GO:0048856//anatomical structure development;GO:0002089//lens morphogenesis in camera-type eye;GO:0007283//spermatogenesis;GO:0048609//multicellular organismal reproductive process;GO:0022412//cellular process involved in reproduction in multicellular organism;GO:0051704//multi-organism process;GO:0044703//multi-organism reproductive process;GO:0007275//multicellular …	K18405//tudor domain-containing protein 1/4/6/7
547097	19	39.66	1.06169	1.09803e-154	1.48204e-156	B020011L13Rik		K09228//KRAB domain-containing zinc finger protein
BGI_novel_G000659	6.42	13.37	1.05835	2.2896e-79	7.37928e-81	BGI_novel_G000659		K09228//KRAB domain-containing zinc finger protein
20823	129.93	270.57	1.05827	0	0	Ssb	GO:0006401//RNA catabolic process;GO:0043628//ncRNA 3'-end processing;GO:0051169//nuclear transport;GO:0015833//peptide transport;GO:0009056//catabolic process;GO:0045184//establishment of protein localization;GO:0008152//metabolic process;GO:0010467//gene expression;GO:0042886//amide transport;GO:0044265//cellular macromolecule catabolic process;GO:0000956//nuclear-transcribed mRNA catabolic pro…	K11090//lupus La protein+ko05322//Systemic lupus erythematosus;K11090//lupus La protein+ko05322//Systemic lupus erythematosus
170757	0.74	1.54	1.05733	1.10344e-06	3.62246e-07	Adgrl4	GO:0009987//cellular process;GO:0007154//cell communication;GO:0023052//signaling;GO:0065007//biological regulation;GO:0007166//cell surface receptor signaling pathway;GO:0051716//cellular response to stimulus;GO:0050789//regulation of biological process;GO:0007165//signal transduction;GO:0050794//regulation of cellular process;GO:0050896//response to stimulus;GO:0044425//membrane part;GO:0044464…	K04595//latrophilin and seven transmembrane domain containing 1;K04595//latrophilin and seven transmembrane domain containing 1
433247	0.53	1.1	1.05344	0.000379059	0.000168216	Cyp2c68	GO:0019752//carboxylic acid metabolic process;GO:1901568//fatty acid derivative metabolic process;GO:0006629//lipid metabolic process;GO:0001676//long-chain fatty acid metabolic process;GO:0008152//metabolic process;GO:0033559//unsaturated fatty acid metabolic process;GO:0044237//cellular metabolic process;GO:0019373//epoxygenase P450 pathway;GO:0009987//cellular process;GO:0006082//organic acid …	K07413//cytochrome P450 family 2 subfamily C [EC:1.14.14.1]+ko04726//Serotonergic synapse+ko00590//Arachidonic acid metabolism+ko00830//Retinol metabolism+ko04750//Inflammatory mediator regulation of TRP channels+ko05204//Chemical carcinogenesis+ko00140//Steroid hormone biosynthesis+ko00591//Linoleic acid metabolism+ko01100//Metabolic pathways;K07413//cytochrome P450 family 2 subfamily C [EC:1.14…
BGI_novel_G000566	1.04	2.15	1.04775	1.1836e-05	4.3268e-06	BGI_novel_G000566	GO:0051252//regulation of RNA metabolic process;GO:0019219//regulation of nucleobase-containing compound metabolic process;GO:1903506//regulation of nucleic acid-templated transcription;GO:0060255//regulation of macromolecule metabolic process;GO:0019222//regulation of metabolic process;GO:2001141//regulation of RNA biosynthetic process;GO:0010468//regulation of gene expression;GO:0065007//biolog…	K09228//KRAB domain-containing zinc finger protein
227933	0.91	1.88	1.04679	1.93866e-11	4.38598e-12	Ccdc148		K21958//extracellular serine/threonine protein kinase FAM20C [EC:2.7.11.1];K06053//recombining binding protein suppressor of hairless+ko04658//Th1 and Th2 cell differentiation+ko05203//Viral carcinogenesis+ko04330//Notch signaling pathway+ko05165//Human papillomavirus infection+ko05169//Epstein-Barr virus infection;K18626//trichohyalin
BGI_novel_G000029	4.6	9.48	1.04325	9.7837e-60	4.52932e-61	BGI_novel_G000029	GO:0032502//developmental process;GO:0070201//regulation of establishment of protein localization;GO:0097435//supramolecular fiber organization;GO:0048869//cellular developmental process;GO:0007017//microtubule-based process;GO:0060322//head development;GO:0051647//nucleus localization;GO:0015031//protein transport;GO:0051049//regulation of transport;GO:0034454//microtubule anchoring at centrosom…	K16537//pericentriolar material 1 protein
216860	0.35	0.72	1.04064	0.000134766	5.61502e-05	Neurl4	GO:0005814//centriole;GO:0005856//cytoskeleton;GO:0044446//intracellular organelle part;GO:0043228//non-membrane-bounded organelle;GO:0044444//cytoplasmic part;GO:0015630//microtubule cytoskeleton;GO:0043229//intracellular organelle;GO:0005815//microtubule organizing center;GO:0044464//cell part;GO:0005622//intracellular;GO:0043226//organelle;GO:0043232//intracellular non-membrane-bounded organel…	K16777//neuralized-like protein 4
BGI_novel_G000677	5.47	11.25	1.04031	1.3321e-06	4.4e-07	BGI_novel_G000677	GO:0050896//response to stimulus;GO:0006952//defense response;GO:0006954//inflammatory response;GO:0006950//response to stress;GO:0043227//membrane-bounded organelle;GO:1903561//extracellular vesicle;GO:0005615//extracellular space;GO:0043226//organelle;GO:0005576//extracellular region;GO:0043230//extracellular organelle;GO:0031982//vesicle;GO:0070062//extracellular exosome;GO:0044421//extracellu…	K22265//NACHT, LRR and PYD domains-containing protein 4
57743	0.71	1.46	1.04008	8.83514e-06	3.17686e-06	Sec61a2	GO:0035966//response to topologically incorrect protein;GO:0008104//protein localization;GO:0035967//cellular response to topologically incorrect protein;GO:0071705//nitrogen compound transport;GO:0034620//cellular response to unfolded protein;GO:0009987//cellular process;GO:0042221//response to chemical;GO:0050794//regulation of cellular process;GO:0006986//response to unfolded protein;GO:000681…	K10956//protein transport protein SEC61 subunit alpha+ko04145//Phagosome+ko04141//Protein processing in endoplasmic reticulum+ko03060//Protein export+ko05110//Vibrio cholerae infection;K10956//protein transport protein SEC61 subunit alpha+ko04145//Phagosome+ko04141//Protein processing in endoplasmic reticulum+ko03060//Protein export+ko05110//Vibrio cholerae infection
110052	55.06	113.16	1.03929	0	0	Dek	GO:0080134//regulation of response to stress;GO:0031323//regulation of cellular metabolic process;GO:0080090//regulation of primary metabolic process;GO:0006338//chromatin remodeling;GO:0009987//cellular process;GO:0065007//biological regulation;GO:0043412//macromolecule modification;GO:0016043//cellular component organization;GO:0016569//covalent chromatin modification;GO:0050794//regulation of …	K17046//protein DEK
224893	2.73	5.61	1.0391	2.73157e-17	4.43804e-18	Zfp959	GO:0009889//regulation of biosynthetic process;GO:0060255//regulation of macromolecule metabolic process;GO:0050794//regulation of cellular process;GO:0010468//regulation of gene expression;GO:0019222//regulation of metabolic process;GO:0010556//regulation of macromolecule biosynthetic process;GO:0006355//regulation of transcription, DNA-templated;GO:0080090//regulation of primary metabolic proce…	K09228//KRAB domain-containing zinc finger protein
76131	0.39	0.8	1.03653	2.73357e-05	1.04412e-05	Depdc1a	GO:0009987//cellular process;GO:0044271//cellular nitrogen compound biosynthetic process;GO:0031324//negative regulation of cellular metabolic process;GO:1903506//regulation of nucleic acid-templated transcription;GO:0006351//transcription, DNA-templated;GO:0045892//negative regulation of transcription, DNA-templated;GO:0007154//cell communication;GO:0050794//regulation of cellular process;GO:003…	K20640//Rho GTPase-activating protein 19;K20632//deleted in liver cancer protein
BGI_novel_G000563	1.58	3.24	1.03607	0.000905562	0.000423224	BGI_novel_G000563	GO:0019219//regulation of nucleobase-containing compound metabolic process;GO:0050794//regulation of cellular process;GO:1903506//regulation of nucleic acid-templated transcription;GO:0080090//regulation of primary metabolic process;GO:0051171//regulation of nitrogen compound metabolic process;GO:2001141//regulation of RNA biosynthetic process;GO:0006355//regulation of transcription, DNA-template…	K09228//KRAB domain-containing zinc finger protein
14805	1.44	2.95	1.03465	5.04281e-15	9.18234e-16	Grik1	GO:0014054//positive regulation of gamma-aminobutyric acid secretion;GO:0007165//signal transduction;GO:0048731//system development;GO:0023057//negative regulation of signaling;GO:0099177//regulation of trans-synaptic signaling;GO:0010648//negative regulation of cell communication;GO:0051966//regulation of synaptic transmission, glutamatergic;GO:0051967//negative regulation of synaptic transmissi…	K05201//glutamate receptor, ionotropic kainate 1+ko04724//Glutamatergic synapse+ko04080//Neuroactive ligand-receptor interaction;K05201//glutamate receptor, ionotropic kainate 1+ko04724//Glutamatergic synapse+ko04080//Neuroactive ligand-receptor interaction
20687	1.5	3.06	1.02857	2.48304e-18	3.83692e-19	Sp3	GO:0008152//metabolic process;GO:0048646//anatomical structure formation involved in morphogenesis;GO:1903507//negative regulation of nucleic acid-templated transcription;GO:0009790//embryo development;GO:0019219//regulation of nucleobase-containing compound metabolic process;GO:0045934//negative regulation of nucleobase-containing compound metabolic process;GO:0010629//negative regulation of gen…	K09193//transcription factor Sp3
100041379	37.81	77.03	1.02665	0	0	Gm13242	GO:2001141//regulation of RNA biosynthetic process;GO:0019219//regulation of nucleobase-containing compound metabolic process;GO:0031323//regulation of cellular metabolic process;GO:0048534//hematopoietic or lymphoid organ development;GO:0030154//cell differentiation;GO:0048869//cellular developmental process;GO:0032502//developmental process;GO:0080090//regulation of primary metabolic process;GO…	K09228//KRAB domain-containing zinc finger protein;K09228//KRAB domain-containing zinc finger protein;K09228//KRAB domain-containing zinc finger protein;K09228//KRAB domain-containing zinc finger protein
22689	0.81	1.65	1.02647	1.66317e-08	4.72568e-09	Zfp27	GO:0090304//nucleic acid metabolic process;GO:0044237//cellular metabolic process;GO:0046483//heterocycle metabolic process;GO:0019219//regulation of nucleobase-containing compound metabolic process;GO:0043170//macromolecule metabolic process;GO:1901362//organic cyclic compound biosynthetic process;GO:0031323//regulation of cellular metabolic process;GO:1901360//organic cyclic compound metabolic …	K09228//KRAB domain-containing zinc finger protein
106029237	0.85	1.73	1.02524	0.000684751	0.000315534	LOC106029237
BGI_novel_G000749	28.23	57.39	1.02357	3.67375e-219	3.22076e-221	BGI_novel_G000749		K11459//polycomb group RING finger protein 4+ko04550//Signaling pathways regulating pluripotency of stem cells+ko05202//Transcriptional misregulation in cancer+ko05206//MicroRNAs in cancer
21834	0.31	0.63	1.02308	7.08563e-06	2.52276e-06	Thrb	GO:0019098//reproductive behavior;GO:1903506//regulation of nucleic acid-templated transcription;GO:0031327//negative regulation of cellular biosynthetic process;GO:0065007//biological regulation;GO:0008152//metabolic process;GO:0060428//lung epithelium development;GO:0060487//lung epithelial cell differentiation;GO:0044249//cellular biosynthetic process;GO:0010604//positive regulation of macromo…	K08362//thyroid hormone receptor beta+ko04919//Thyroid hormone signaling pathway+ko04080//Neuroactive ligand-receptor interaction;K08362//thyroid hormone receptor beta+ko04919//Thyroid hormone signaling pathway+ko04080//Neuroactive ligand-receptor interaction
626316	3.39	6.88	1.02112	2.15143e-27	2.2878e-28	Gm13051	GO:0031323//regulation of cellular metabolic process;GO:0019222//regulation of metabolic process;GO:0006355//regulation of transcription, DNA-templated;GO:2000112//regulation of cellular macromolecule biosynthetic process;GO:0050789//regulation of biological process;GO:1903506//regulation of nucleic acid-templated transcription;GO:2001141//regulation of RNA biosynthetic process;GO:0051171//regula…	K09228//KRAB domain-containing zinc finger protein
18386	0.34	0.69	1.02106	0.000354825	0.000156454	Oprd1	GO:0050794//regulation of cellular process;GO:0010605//negative regulation of macromolecule metabolic process;GO:0043269//regulation of ion transport;GO:0008344//adult locomotory behavior;GO:0070482//response to oxygen levels;GO:0033135//regulation of peptidyl-serine phosphorylation;GO:0010033//response to organic substance;GO:0031333//negative regulation of protein complex assembly;GO:0065007//b…	K04213//delta-type opioid receptor+ko04022//cGMP-PKG signaling pathway+ko04071//Sphingolipid signaling pathway+ko04080//Neuroactive ligand-receptor interaction;K04213//delta-type opioid receptor+ko04022//cGMP-PKG signaling pathway+ko04071//Sphingolipid signaling pathway+ko04080//Neuroactive ligand-receptor interaction;K04213//delta-type opioid receptor+ko04022//cGMP-PKG signaling pathway+ko04071/…
100041734	14.42	29.24	1.01987	3.96889e-104	9.16186e-106	4930522L14Rik	GO:2000112//regulation of cellular macromolecule biosynthetic process;GO:0050789//regulation of biological process;GO:1903506//regulation of nucleic acid-templated transcription;GO:0050794//regulation of cellular process;GO:0031323//regulation of cellular metabolic process;GO:0019219//regulation of nucleobase-containing compound metabolic process;GO:0009889//regulation of biosynthetic process;GO:…	K09228//KRAB domain-containing zinc finger protein;K09228//KRAB domain-containing zinc finger protein
75216	2.98	6.04	1.01924	4.47082e-23	5.63964e-24	Cep128	GO:0005737//cytoplasm;GO:0005815//microtubule organizing center;GO:0005622//intracellular;GO:0044464//cell part;GO:0015630//microtubule cytoskeleton;GO:0044430//cytoskeletal part;GO:0044424//intracellular part;GO:0044446//intracellular organelle part;GO:0043229//intracellular organelle;GO:0044450//microtubule organizing center part;GO:0005819//spindle;GO:0043228//non-membrane-bounded organelle;GO…	K16460//centrosomal protein CEP128;K16460//centrosomal protein CEP128
100009609	1.23	2.49	1.01749	3.30961e-08	9.5938e-09	Vmn2r65	GO:0016021//integral component of membrane;GO:0044425//membrane part;GO:0031224//intrinsic component of membrane;GO:0071944//cell periphery;GO:0044464//cell part;GO:0005623//cell;GO:0016020//membrane;GO:0005886//plasma membrane;GO:0004888//transmembrane signaling receptor activity;GO:0099600//transmembrane receptor activity;GO:0004871//signal transducer activity;GO:0038023//signaling receptor act…	K04613//vomeronasal 2 receptor;K04613//vomeronasal 2 receptor;K04612//calcium-sensing receptor+ko04621//NOD-like receptor signaling pathway+ko04928//Parathyroid hormone synthesis, secretion and action
26409	0.51	1.03	1.01408	1.18161e-08	3.3097e-09	Map3k7	GO:0070887//cellular response to chemical stimulus;GO:0060429//epithelium development;GO:0046328//regulation of JNK cascade;GO:0044267//cellular protein metabolic process;GO:0071902//positive regulation of protein serine/threonine kinase activity;GO:0010941//regulation of cell death;GO:0006464//cellular protein modification process;GO:0006796//phosphate-containing compound metabolic process;GO:00…	K04427//mitogen-activated protein kinase kinase kinase 7 [EC:2.7.11.25]+ko04140//Autophagy - animal+ko04214//Apoptosis - fly+ko05418//Fluid shear stress and atherosclerosis+ko04657//IL-17 signaling pathway+ko04380//Osteoclast differentiation+ko04310//Wnt signaling pathway+ko04668//TNF signaling pathway+ko04660//T cell receptor signaling pathway+ko05145//Toxoplasmosis+ko05140//Leishmaniasis+ko0462…
72371	2.11	4.25	1.01022	2.9668e-08	8.57574e-09	2210408I21Rik
232491	0.8	1.61	1.00899	2.22738e-07	6.89216e-08	Pyroxd1	GO:0009987//cellular process;GO:0070887//cellular response to chemical stimulus;GO:0050896//response to stimulus;GO:0042221//response to chemical;GO:0006979//response to oxidative stress;GO:0051716//cellular response to stimulus;GO:0006950//response to stress;GO:0033554//cellular response to stress;GO:0034599//cellular response to oxidative stress;GO:0030017//sarcomere;GO:0044422//organelle part;…	K16174//small subunit ribosomal protein S18b, mitochondrial+ko05203//Viral carcinogenesis;K22747//apoptosis-inducing factor 3;K16174//small subunit ribosomal protein S18b, mitochondrial+ko05203//Viral carcinogenesis;K10899//ATP-dependent DNA helicase Q1 [EC:3.6.4.12]
100170401	2.44	4.9	1.0059	6.29314e-12	1.37413e-12	EU599041	GO:1903506//regulation of nucleic acid-templated transcription;GO:0060255//regulation of macromolecule metabolic process;GO:0006355//regulation of transcription, DNA-templated;GO:0034605//cellular response to heat;GO:0009266//response to temperature stimulus;GO:0009889//regulation of biosynthetic process;GO:0033554//cellular response to stress;GO:0019222//regulation of metabolic process;GO:003132…	K09228//KRAB domain-containing zinc finger protein;K09228//KRAB domain-containing zinc finger protein
665775	2.5	5.02	1.00576	1.37097e-69	5.15358e-71	Bod1l	GO:0006260//DNA replication;GO:1901576//organic substance biosynthetic process;GO:0050896//response to stimulus;GO:0044238//primary metabolic process;GO:0009987//cellular process;GO:0006139//nucleobase-containing compound metabolic process;GO:0090304//nucleic acid metabolic process;GO:0006950//response to stress;GO:0044260//cellular macromolecule metabolic process;GO:0045005//DNA-dependent DNA re…	K13024//inositol-hexakisphosphate/diphosphoinositol-pentakisphosphate 1-kinase [EC:2.7.4.24]+ko04070//Phosphatidylinositol signaling system
70951	2.6	5.21	1.00277	3.24057e-16	5.54708e-17	Spata1		K12310//Di-N-acetylchitobiase [EC:3.2.1.-];K12310//Di-N-acetylchitobiase [EC:3.2.1.-];K12310//Di-N-acetylchitobiase [EC:3.2.1.-]
BGI_novel_G000637	6.48	12.98	1.00222	1.48704e-23	1.83453e-24	BGI_novel_G000637
102633791	0.55	1.1	1	0.000159545	6.70282e-05	Gm31532	GO:0003824//catalytic activity;GO:0016787//hydrolase activity;GO:0016788//hydrolase activity, acting on ester bonds;GO:0042578//phosphoric ester hydrolase activity;GO:0004722//protein serine/threonine phosphatase activity;GO:0016791//phosphatase activity;GO:0004721//phosphoprotein phosphatase activity;GO:0140096//catalytic activity, acting on a protein;	K12822//RNA-binding protein 25+ko03040//Spliceosome;K16340//PH domain and leucine-rich repeat-containing protein phosphatase [EC:3.1.3.16]+ko04151//PI3K-Akt signaling pathway
12454	0.57	1.14	1	4.65001e-05	1.82422e-05	Ccnk	GO:0043227//membrane-bounded organelle;GO:0044424//intracellular part;GO:0043229//intracellular organelle;GO:0005634//nucleus;GO:0043231//intracellular membrane-bounded organelle;GO:0044464//cell part;GO:0005622//intracellular;GO:0005623//cell;GO:0043226//organelle;	K02184//formin 2+ko04320//Dorso-ventral axis formation
12751	0.57	1.14	1	1.57093e-06	5.23446e-07	Tpp1	GO:0007417//central nervous system development;GO:0016043//cellular component organization;GO:0071840//cellular component organization or biogenesis;GO:0044237//cellular metabolic process;GO:0048731//system development;GO:0060429//epithelium development;GO:0019538//protein metabolic process;GO:0006996//organelle organization;GO:0001894//tissue homeostasis;GO:0071704//organic substance metabolic p…	K01279//tripeptidyl-peptidase I [EC:3.4.14.9]+ko04142//Lysosome
214899	0.1	0.2	1	0.000379005	0.000168216	Kdm5a	GO:0009059//macromolecule biosynthetic process;GO:0033044//regulation of chromosome organization;GO:1902679//negative regulation of RNA biosynthetic process;GO:0010604//positive regulation of macromolecule metabolic process;GO:0010557//positive regulation of macromolecule biosynthetic process;GO:0034641//cellular nitrogen compound metabolic process;GO:0009892//negative regulation of metabolic pro…	K11446//histone demethylase JARID1 [EC:1.14.11.-];K11446//histone demethylase JARID1 [EC:1.14.11.-]
268780	0.59	1.18	1	0.000138042	5.75848e-05	Egflam	GO:0010811//positive regulation of cell-substrate adhesion;GO:0044267//cellular protein metabolic process;GO:0030203//glycosaminoglycan metabolic process;GO:0010810//regulation of cell-substrate adhesion;GO:1901135//carbohydrate derivative metabolic process;GO:1901564//organonitrogen compound metabolic process;GO:0018209//peptidyl-serine modification;GO:0043170//macromolecule metabolic process;GO…	K06254//agrin+ko04512//ECM-receptor interaction;K06255//heparan sulfate proteoglycan 2 (perlecan)+ko04512//ECM-receptor interaction+ko05205//Proteoglycans in cancer+ko05161//Hepatitis B;K06255//heparan sulfate proteoglycan 2 (perlecan)+ko04512//ECM-receptor interaction+ko05205//Proteoglycans in cancer+ko05161//Hepatitis B
29864	0.57	1.14	1	0.000366318	0.000161753	Rnf11	GO:0006807//nitrogen compound metabolic process;GO:0009057//macromolecule catabolic process;GO:0006464//cellular protein modification process;GO:0042787//protein ubiquitination involved in ubiquitin-dependent protein catabolic process;GO:0051865//protein autoubiquitination;GO:0044267//cellular protein metabolic process;GO:1901564//organonitrogen compound metabolic process;GO:0010498//proteasomal …	K11980//E3 ubiquitin-protein ligase RNF11
66637	2.76	5.52	1	9.91309e-09	2.76416e-09	Tsen15	GO:0010467//gene expression;GO:0090304//nucleic acid metabolic process;GO:0009987//cellular process;GO:0006725//cellular aromatic compound metabolic process;GO:0006388//tRNA splicing, via endonucleolytic cleavage and ligation;GO:0044237//cellular metabolic process;GO:0043170//macromolecule metabolic process;GO:1901360//organic cyclic compound metabolic process;GO:0006397//mRNA processing;GO:00080…	K15324//tRNA-splicing endonuclease subunit Sen15
76563	0.82	1.64	1	3.43597e-05	1.32714e-05	Qrsl1	GO:0031647//regulation of protein stability;GO:0006725//cellular aromatic compound metabolic process;GO:0008152//metabolic process;GO:0034641//cellular nitrogen compound metabolic process;GO:0006399//tRNA metabolic process;GO:0010467//gene expression;GO:0090304//nucleic acid metabolic process;GO:0065007//biological regulation;GO:0019538//protein metabolic process;GO:0044260//cellular macromolecul…	K02433//aspartyl-tRNA(Asn)/glutamyl-tRNA(Gln) amidotransferase subunit A [EC:6.3.5.6 6.3.5.7]+ko00970//Aminoacyl-tRNA biosynthesis+ko01100//Metabolic pathways
99887	0.18	0.36	1	0.000114315	4.72474e-05	Tmem56	GO:0044425//membrane part;GO:0016020//membrane;GO:0031224//intrinsic component of membrane;GO:0016021//integral component of membrane;	K01764//cytochrome c heme-lyase [EC:4.4.1.17]+ko00860//Porphyrin and chlorophyll metabolism
