# Supplementary material for: The ubiquitin ligase KBTBD8 regulates PKM1 levels via Erk1/2 and Aurora A to ensure oocyte quality
Source: Aging (Albany NY). 2019 Feb 20;11(4):1110–28. doi: 10.18632/aging.101802 (PMC6402520; doi:10.18632/aging.101802)
Supplement: Supplementary Dataset 3 [file aging-11-101802-s004.xlsx]

## Sheet: KBTBD8 vs control-RBMs-up+down
Gene ID	IgG FPKM	K8 FPKM	Other Gene ID	log2(K8/IgG)	FDR(IgG-vs-K8)	Pvalue(IgG-vs-K8)	GO	Kegg Orthology
71684	0.23	0	Rbm43	-4.52356	2.52378e-05	9.59372e-06	GO:0003676//nucleic acid binding;GO:0003723//RNA binding;GO:0005488//binding;GO:1901363//heterocyclic compound binding;GO:0097159//organic cyclic compound binding;
236732	0.63	0.16	Rbm10	-1.97728	1.56633e-08	4.43966e-09	GO:1902369//negative regulation of RNA catabolic process;GO:0046483//heterocycle metabolic process;GO:0010629//negative regulation of gene expression;GO:0048523//negative regulation of cellular process;GO:0006725//cellular aromatic compound metabolic process;GO:0008152//metabolic process;GO:0048522//positive regulation of cellular process;GO:0009894//regulation of catabolic process;GO:2001141//re…	K13094//RNA-binding protein 5/10;K13094//RNA-binding protein 5/10;K13094//RNA-binding protein 5/10
56190	47.07	12.46	Rbm38	-1.9175	1.78296e-295	1.05707e-297	GO:0043484//regulation of RNA splicing;GO:0072413//signal transduction involved in mitotic cell cycle checkpoint;GO:0048522//positive regulation of cellular process;GO:0043489//RNA stabilization;GO:0072331//signal transduction by p53 class mediator;GO:0071156//regulation of cell cycle arrest;GO:0061013//regulation of mRNA catabolic process;GO:0016070//RNA metabolic process;GO:0006977//DNA damage …	K12741//heterogeneous nuclear ribonucleoprotein A1/A3+ko03040//Spliceosome;K14411//RNA-binding protein Musashi+ko03015//mRNA surveillance pathway
56275	1.31	0.41	Rbm14	-1.67587	1.70693e-11	3.8445e-12	GO:0019438//aromatic compound biosynthetic process;GO:0031023//microtubule organizing center organization;GO:0007167//enzyme linked receptor protein signaling pathway;GO:0060255//regulation of macromolecule metabolic process;GO:0016569//covalent chromatin modification;GO:0010557//positive regulation of macromolecule biosynthetic process;GO:0010467//gene expression;GO:0016575//histone deacetylatio…	K13189//RNA-binding protein 14;K13189//RNA-binding protein 14
68035	18.21	8.53	Rbm42	-1.09411	1.55933e-47	9.19568e-49	GO:0051172//negative regulation of nitrogen compound metabolic process;GO:0048519//negative regulation of biological process;GO:0051252//regulation of RNA metabolic process;GO:0051253//negative regulation of RNA metabolic process;GO:0050684//regulation of mRNA processing;GO:0065007//biological regulation;GO:0048025//negative regulation of mRNA splicing, via spliceosome;GO:0010629//negative regula…	K22020//mucin-19
245945	3.43	1.64	Rbm47	-1.06451	1.21565e-24	1.43072e-25	GO:0048869//cellular developmental process;GO:0002520//immune system development;GO:0016553//base conversion or substitution editing;GO:0016554//cytidine to uridine editing;GO:0048731//system development;GO:0048856//anatomical structure development;GO:0009987//cellular process;GO:0044237//cellular metabolic process;GO:0030097//hemopoiesis;GO:0043170//macromolecule metabolic process;GO:0043412//ma…	K11972//E3 ubiquitin-protein ligase RNF19A [EC:2.3.2.31];K01876//aspartyl-tRNA synthetase [EC:6.1.1.12]+ko00970//Aminoacyl-tRNA biosynthesis;K13161//heterogeneous nuclear ribonucleoprotein R;K11972//E3 ubiquitin-protein ligase RNF19A [EC:2.3.2.31];K01876//aspartyl-tRNA synthetase [EC:6.1.1.12]+ko00970//Aminoacyl-tRNA biosynthesis;K13161//heterogeneous nuclear ribonucleoprotein R;K11972//E3 ubiqui…
76572	0.02	0	Rbmxl2	-1	0.5005	0.432662	GO:0003723//RNA binding;GO:1901363//heterocyclic compound binding;GO:0005488//binding;GO:0003676//nucleic acid binding;GO:0097159//organic cyclic compound binding;	K12885//heterogeneous nuclear ribonucleoprotein G+ko03040//Spliceosome
109095	2.37	1.32	Rbm15b	-0.844349	3.32932e-08	9.65304e-09	GO:2001141//regulation of RNA biosynthetic process;GO:0010467//gene expression;GO:0006807//nitrogen compound metabolic process;GO:0009987//cellular process;GO:0034654//nucleobase-containing compound biosynthetic process;GO:0006351//transcription, DNA-templated;GO:0009059//macromolecule biosynthetic process;GO:0019219//regulation of nucleobase-containing compound metabolic process;GO:0050789//regu…	K13190//RNA-binding protein 15
207181	0.14	0.08	Rbms3	-0.807355	0.00894374	0.00498266	GO:0009607//response to biotic stimulus;GO:0023057//negative regulation of signaling;GO:0048585//negative regulation of response to stimulus;GO:0048518//positive regulation of biological process;GO:0009893//positive regulation of metabolic process;GO:0009966//regulation of signal transduction;GO:0031328//positive regulation of cellular biosynthetic process;GO:0019222//regulation of metabolic proc…	K13126//polyadenylate-binding protein+ko03018//RNA degradation+ko03013//RNA transport+ko03015//mRNA surveillance pathway;K13208//ELAV like protein 2/3/4;K13208//ELAV like protein 2/3/4;K13208//ELAV like protein 2/3/4;K13208//ELAV like protein 2/3/4;K13208//ELAV like protein 2/3/4;K13208//ELAV like protein 2/3/4;K13208//ELAV like protein 2/3/4;K02177//bruno+ko04320//Dorso-ventral axis formation;K1…
19653	3.46	2.08	Rbm4	-0.734189	9.92167e-10	2.5419e-10	GO:0030855//epithelial cell differentiation;GO:0002790//peptide secretion;GO:1903311//regulation of mRNA metabolic process;GO:0006413//translational initiation;GO:0051049//regulation of transport;GO:0002183//cytoplasmic translational initiation;GO:0009648//photoperiodism;GO:0044249//cellular biosynthetic process;GO:0023051//regulation of signaling;GO:0009058//biosynthetic process;GO:0071326//cell…	K13187//RNA-binding protein 4
56878	1.01	0.63	Rbms1	-0.680932	0.00653618	0.00353172	GO:0044260//cellular macromolecule metabolic process;GO:0034645//cellular macromolecule biosynthetic process;GO:0044237//cellular metabolic process;GO:0006139//nucleobase-containing compound metabolic process;GO:1901360//organic cyclic compound metabolic process;GO:0009059//macromolecule biosynthetic process;GO:0034641//cellular nitrogen compound metabolic process;GO:0006259//DNA metabolic proces…	K13208//ELAV like protein 2/3/4;K13208//ELAV like protein 2/3/4;K05746//enabled+ko04360//Axon guidance+ko04810//Regulation of actin cytoskeleton;K19475//WAS/WASL-interacting protein+ko04144//Endocytosis
74111	2.97	1.93	Rbm19	-0.621862	5.79105e-09	1.58263e-09	GO:0051094//positive regulation of developmental process;GO:0007275//multicellular organism development;GO:0032501//multicellular organismal process;GO:0040019//positive regulation of embryonic development;GO:0048518//positive regulation of biological process;GO:0050793//regulation of developmental process;GO:0051240//positive regulation of multicellular organismal process;GO:0065007//biological …	K14787//multiple RNA-binding domain-containing protein 1;K14787//multiple RNA-binding domain-containing protein 1;K14787//multiple RNA-binding domain-containing protein 1;K14787//multiple RNA-binding domain-containing protein 1
66810	40.08	27.24	Rbm22	-0.557156	1.80703e-40	1.27763e-41	GO:0060255//regulation of macromolecule metabolic process;GO:0009893//positive regulation of metabolic process;GO:0071826//ribonucleoprotein complex subunit organization;GO:0017038//protein import;GO:0080090//regulation of primary metabolic process;GO:0016071//mRNA metabolic process;GO:0034504//protein localization to nucleus;GO:0009987//cellular process;GO:0042221//response to chemical;GO:000688…	K12872//pre-mRNA-splicing factor RBM22/SLT11+ko03040//Spliceosome
75710	2.09	1.45	Rbm12	-0.52745	0.000149653	6.2655e-05	GO:0005623//cell;GO:0043231//intracellular membrane-bounded organelle;GO:0070013//intracellular organelle lumen;GO:0031981//nuclear lumen;GO:0044446//intracellular organelle part;GO:0043226//organelle;GO:0043227//membrane-bounded organelle;GO:0005654//nucleoplasm;GO:0043229//intracellular organelle;GO:0044464//cell part;GO:0044428//nuclear part;GO:0044424//intracellular part;GO:0044422//organelle…	K14407//cleavage stimulation factor subunit 2+ko03015//mRNA surveillance pathway;K14211//elastin+ko04974//Protein digestion and absorption
381626	2.29	1.61	Rbm33	-0.508287	3.7493e-08	1.09251e-08	GO:0005488//binding;GO:0003676//nucleic acid binding;GO:0003723//RNA binding;GO:0097159//organic cyclic compound binding;GO:1901363//heterocyclic compound binding;	K04650//nuclear receptor co-repressor 1+ko01522//Endocrine resistance+ko04919//Thyroid hormone signaling pathway+ko05202//Transcriptional misregulation in cancer
237073	0.49	0.36	Rbm41	-0.444785	0.201446	0.151132	GO:0000377//RNA splicing, via transesterification reactions with bulged adenosine as nucleophile;GO:0043170//macromolecule metabolic process;GO:0006807//nitrogen compound metabolic process;GO:0009987//cellular process;GO:0006725//cellular aromatic compound metabolic process;GO:1901360//organic cyclic compound metabolic process;GO:0006396//RNA processing;GO:0090304//nucleic acid metabolic process;…	K13157//U11/U12 small nuclear ribonucleoprotein 65 kDa protein;K13157//U11/U12 small nuclear ribonucleoprotein 65 kDa protein;K13157//U11/U12 small nuclear ribonucleoprotein 65 kDa protein;K13157//U11/U12 small nuclear ribonucleoprotein 65 kDa protein;K13157//U11/U12 small nuclear ribonucleoprotein 65 kDa protein;K13157//U11/U12 small nuclear ribonucleoprotein 65 kDa protein
229700	3.68	2.92	Rbm15	-0.333737	0.00239664	0.00120399	GO:0031326//regulation of cellular biosynthetic process;GO:0007507//heart development;GO:0010605//negative regulation of macromolecule metabolic process;GO:0003281//ventricular septum development;GO:1903507//negative regulation of nucleic acid-templated transcription;GO:0002683//negative regulation of immune system process;GO:0043170//macromolecule metabolic process;GO:0001763//morphogenesis of a…	K13190//RNA-binding protein 15
68272	7.37	6.05	Rbm28	-0.284729	1.96609e-05	7.3919e-06	GO:0006807//nitrogen compound metabolic process;GO:0071704//organic substance metabolic process;GO:0006725//cellular aromatic compound metabolic process;GO:0043170//macromolecule metabolic process;GO:0044238//primary metabolic process;GO:1901360//organic cyclic compound metabolic process;GO:0044237//cellular metabolic process;GO:0016071//mRNA metabolic process;GO:0006139//nucleobase-containing co…	K14573//nucleolar protein 4+ko03008//Ribosome biogenesis in eukaryotes
76938	137.17	118.85	Rbm17	-0.206823	5.02809e-17	8.28976e-18	GO:0009987//cellular process;GO:0006807//nitrogen compound metabolic process;GO:0050794//regulation of cellular process;GO:0006397//mRNA processing;GO:0050896//response to stimulus;GO:0044238//primary metabolic process;GO:0006139//nucleobase-containing compound metabolic process;GO:0046483//heterocycle metabolic process;GO:0008152//metabolic process;GO:0043484//regulation of RNA splicing;GO:00160…	K12840//splicing factor 45+ko03040//Spliceosome;K12840//splicing factor 45+ko03040//Spliceosome
19654	21.63	21.46	Rbm6	-0.0113836	0.0689684	0.0462834	GO:0044464//cell part;GO:0043226//organelle;GO:0043227//membrane-bounded organelle;GO:0043229//intracellular organelle;GO:0005622//intracellular;GO:0005634//nucleus;GO:0044424//intracellular part;GO:0043231//intracellular membrane-bounded organelle;GO:0005623//cell;GO:0005488//binding;GO:0097159//organic cyclic compound binding;GO:0003723//RNA binding;GO:0003676//nucleic acid binding;GO:1901363//…	K13094//RNA-binding protein 5/10;K13094//RNA-binding protein 5/10;K13094//RNA-binding protein 5/10;K13094//RNA-binding protein 5/10;K13094//RNA-binding protein 5/10;K13094//RNA-binding protein 5/10;K13094//RNA-binding protein 5/10
329207	47.46	48.75	Rbm44	0.0386901	0.176785	0.130913	GO:0005576//extracellular region;GO:0005737//cytoplasm;GO:0044464//cell part;GO:0044424//intracellular part;GO:0005622//intracellular;GO:0044421//extracellular region part;GO:0005623//cell;GO:0045171//intercellular bridge;GO:0042802//identical protein binding;GO:0097159//organic cyclic compound binding;GO:0046983//protein dimerization activity;GO:0005515//protein binding;GO:0003676//nucleic acid …
56516	3.86	3.99	Rbms2	0.0477879	0.587735	0.525792	GO:0044464//cell part;GO:0005634//nucleus;GO:0043229//intracellular organelle;GO:0005622//intracellular;GO:0043227//membrane-bounded organelle;GO:0043231//intracellular membrane-bounded organelle;GO:0044424//intracellular part;GO:0043226//organelle;GO:0005623//cell;GO:0003723//RNA binding;GO:0005488//binding;GO:1901363//heterocyclic compound binding;GO:0003676//nucleic acid binding;GO:0097159//or…	K13208//ELAV like protein 2/3/4;K13088//ELAV-like protein 1+ko04657//IL-17 signaling pathway+ko04152//AMPK signaling pathway;K13208//ELAV like protein 2/3/4;K13088//ELAV-like protein 1+ko04657//IL-17 signaling pathway+ko04152//AMPK signaling pathway
67889	181.09	187.9	Rbm18	0.0532582	0.00230685	0.00115655	GO:0005488//binding;GO:0097159//organic cyclic compound binding;GO:0003676//nucleic acid binding;GO:0003723//RNA binding;GO:1901363//heterocyclic compound binding;
19652	44.53	46.85	Rbm3	0.0732714	0.155747	0.114156	GO:0043170//macromolecule metabolic process;GO:0032269//negative regulation of cellular protein metabolic process;GO:0034250//positive regulation of cellular amide metabolic process;GO:0040029//regulation of gene expression, epigenetic;GO:0006396//RNA processing;GO:0019222//regulation of metabolic process;GO:0034249//negative regulation of cellular amide metabolic process;GO:0031326//regulation o…	K13186//RNA-binding protein 3
19656	14.51	15.29	Rbmxl1	0.0755409	0.37054	0.306832	GO:0048522//positive regulation of cellular process;GO:2000112//regulation of cellular macromolecule biosynthetic process;GO:0050896//response to stimulus;GO:0000398//mRNA splicing, via spliceosome;GO:0045944//positive regulation of transcription from RNA polymerase II promoter;GO:0050685//positive regulation of mRNA processing;GO:0006357//regulation of transcription from RNA polymerase II promot…	K12885//heterogeneous nuclear ribonucleoprotein G+ko03040//Spliceosome
60365	34.87	37.02	Rbm8a	0.0863185	0.0262591	0.0160701	GO:0034641//cellular nitrogen compound metabolic process;GO:0006366//transcription from RNA polymerase II promoter;GO:1901575//organic substance catabolic process;GO:0071427//mRNA-containing ribonucleoprotein complex export from nucleus;GO:0044271//cellular nitrogen compound biosynthetic process;GO:0071705//nitrogen compound transport;GO:0051641//cellular localization;GO:0051252//regulation of RN…	K12876//RNA-binding protein 8A+ko03040//Spliceosome+ko03013//RNA transport+ko03015//mRNA surveillance pathway
269623	22.09	23.67	Rbm48	0.0996663	0.0871523	0.0597616	GO:0044424//intracellular part;GO:0043226//organelle;GO:0031981//nuclear lumen;GO:0043231//intracellular membrane-bounded organelle;GO:0005634//nucleus;GO:0044428//nuclear part;GO:0005623//cell;GO:0031974//membrane-enclosed lumen;GO:0043229//intracellular organelle;GO:0043227//membrane-bounded organelle;GO:0044446//intracellular organelle part;GO:0005654//nucleoplasm;GO:0044422//organelle part;GO…	K13338//peroxin-1+ko04146//Peroxisome
66704	7.61	8.49	Rbm4b	0.157868	0.308942	0.247738	GO:0080090//regulation of primary metabolic process;GO:0010467//gene expression;GO:0046483//heterocycle metabolic process;GO:0042752//regulation of circadian rhythm;GO:0008380//RNA splicing;GO:0009605//response to external stimulus;GO:0043170//macromolecule metabolic process;GO:0050896//response to stimulus;GO:0009649//entrainment of circadian clock;GO:0009628//response to abiotic stimulus;GO:001…	K13187//RNA-binding protein 4;K13187//RNA-binding protein 4;K13187//RNA-binding protein 4
170791	55.07	65.2	Rbm39	0.243605	1.62417e-25	1.84698e-26	GO:0006351//transcription, DNA-templated;GO:0097659//nucleic acid-templated transcription;GO:0008380//RNA splicing;GO:0009987//cellular process;GO:0031323//regulation of cellular metabolic process;GO:0046483//heterocycle metabolic process;GO:0065007//biological regulation;GO:0032774//RNA biosynthetic process;GO:0010467//gene expression;GO:0006396//RNA processing;GO:0044249//cellular biosynthetic …	K13091//RNA-binding protein 39;K13091//RNA-binding protein 39
241490	2.43	2.88	Rbm45	0.245112	0.155404	0.113835	GO:0048869//cellular developmental process;GO:0009987//cellular process;GO:0007399//nervous system development;GO:0048856//anatomical structure development;GO:0007275//multicellular organism development;GO:0032502//developmental process;GO:0030154//cell differentiation;GO:0048731//system development;GO:0032501//multicellular organismal process;GO:0044464//cell part;GO:0043229//intracellular organ…	K13207//CUG-BP- and ETR3-like factor
67010	181.42	220.39	Rbm7	0.280725	7.25275e-52	3.87454e-53	GO:0051252//regulation of RNA metabolic process;GO:0019219//regulation of nucleobase-containing compound metabolic process;GO:0050794//regulation of cellular process;GO:0010468//regulation of gene expression;GO:0007049//cell cycle;GO:0019222//regulation of metabolic process;GO:0050684//regulation of mRNA processing;GO:0080090//regulation of primary metabolic process;GO:0060255//regulation of macr…	K13188//RNA-binding protein 7
77604	12.44	15.23	Rbm12b2	0.291929	2.24239e-08	6.41674e-09	GO:1901363//heterocyclic compound binding;GO:0003723//RNA binding;GO:0003676//nucleic acid binding;GO:0005488//binding;GO:0097159//organic cyclic compound binding;	K14947//epithelial splicing regulatory protein 1/2;K12898//heterogeneous nuclear ribonucleoprotein F/H
72397	2.54	3.12	Rbm12b1	0.296718	0.0190641	0.0113519	GO:0097159//organic cyclic compound binding;GO:0003723//RNA binding;GO:0005488//binding;GO:1901363//heterocyclic compound binding;GO:0003676//nucleic acid binding;	K14947//epithelial splicing regulatory protein 1/2;K12898//heterogeneous nuclear ribonucleoprotein F/H;K14947//epithelial splicing regulatory protein 1/2;K12898//heterogeneous nuclear ribonucleoprotein F/H
83486	8.87	11.06	Rbm5	0.318345	1.79926e-06	6.04632e-07	GO:0008152//metabolic process;GO:0000375//RNA splicing, via transesterification reactions;GO:0043068//positive regulation of programmed cell death;GO:0022613//ribonucleoprotein complex biogenesis;GO:0006915//apoptotic process;GO:1903311//regulation of mRNA metabolic process;GO:0006139//nucleobase-containing compound metabolic process;GO:0016043//cellular component organization;GO:0065003//macromo…	K13094//RNA-binding protein 5/10;K13094//RNA-binding protein 5/10
225432	10.57	13.34	Rbm27	0.335783	1.67675e-29	1.65401e-30	GO:0008152//metabolic process;GO:0090304//nucleic acid metabolic process;GO:0046483//heterocycle metabolic process;GO:0009987//cellular process;GO:0071704//organic substance metabolic process;GO:0006397//mRNA processing;GO:0006139//nucleobase-containing compound metabolic process;GO:0044237//cellular metabolic process;GO:0034641//cellular nitrogen compound metabolic process;GO:0044238//primary me…	K13193//RNA-binding protein 27;K13193//RNA-binding protein 27
209003	6.75	8.92	Rbmx2	0.402156	5.28081e-05	2.09234e-05	GO:0090304//nucleic acid metabolic process;GO:0051028//mRNA transport;GO:0071427//mRNA-containing ribonucleoprotein complex export from nucleus;GO:0006913//nucleocytoplasmic transport;GO:0071702//organic substance transport;GO:0033036//macromolecule localization;GO:0008380//RNA splicing;GO:1901360//organic cyclic compound metabolic process;GO:0046483//heterocycle metabolic process;GO:0046907//int…	K13107//RNA-binding motif protein, X-linked 2
73713	0.59	0.84	Rbm20	0.509674	0.00291857	0.00148036	GO:0010468//regulation of gene expression;GO:0065007//biological regulation;GO:0043170//macromolecule metabolic process;GO:1901360//organic cyclic compound metabolic process;GO:0051252//regulation of RNA metabolic process;GO:0010604//positive regulation of macromolecule metabolic process;GO:0048518//positive regulation of biological process;GO:0048731//system development;GO:0044237//cellular meta…	K13213//matrin 3
52202	0.87	1.44	Rbm34	0.726982	9.51168e-05	3.88566e-05	GO:0043229//intracellular organelle;GO:0043231//intracellular membrane-bounded organelle;GO:0070013//intracellular organelle lumen;GO:0044424//intracellular part;GO:0043232//intracellular non-membrane-bounded organelle;GO:0031981//nuclear lumen;GO:0043227//membrane-bounded organelle;GO:0044446//intracellular organelle part;GO:0043228//non-membrane-bounded organelle;GO:0005622//intracellular;GO:00…	K14837//nucleolar protein 12
74213	7.21	13.25	Rbm26	0.877921	7.48873e-114	1.502e-115	GO:0051336//regulation of hydrolase activity;GO:0043170//macromolecule metabolic process;GO:0071704//organic substance metabolic process;GO:0051346//negative regulation of hydrolase activity;GO:0006139//nucleobase-containing compound metabolic process;GO:0034641//cellular nitrogen compound metabolic process;GO:0019220//regulation of phosphate metabolic process;GO:0051174//regulation of phosphorus…	K13192//RNA-binding protein 26;K13192//RNA-binding protein 26;K13192//RNA-binding protein 26;K13192//RNA-binding protein 26;K13192//RNA-binding protein 26
67039	18.18	34.6	Rbm25	0.92842	1.53801e-175	1.78489e-177	GO:0044238//primary metabolic process;GO:0043067//regulation of programmed cell death;GO:0051252//regulation of RNA metabolic process;GO:0050794//regulation of cellular process;GO:0006139//nucleobase-containing compound metabolic process;GO:0043170//macromolecule metabolic process;GO:0019219//regulation of nucleobase-containing compound metabolic process;GO:0006915//apoptotic process;GO:0046483//…	K12822//RNA-binding protein 25+ko03040//Spliceosome;K12822//RNA-binding protein 25+ko03040//Spliceosome;K12822//RNA-binding protein 25+ko03040//Spliceosome;K12822//RNA-binding protein 25+ko03040//Spliceosome;K12822//RNA-binding protein 25+ko03040//Spliceosome
19655	0.26	0.53	Rbmx	1.02748	0.00962514	0.00538352	GO:0050896//response to stimulus;GO:0034641//cellular nitrogen compound metabolic process;GO:0044271//cellular nitrogen compound biosynthetic process;GO:0000381//regulation of alternative mRNA splicing, via spliceosome;GO:0009059//macromolecule biosynthetic process;GO:0051171//regulation of nitrogen compound metabolic process;GO:0010628//positive regulation of gene expression;GO:0044260//cellular…	K12885//heterogeneous nuclear ribonucleoprotein G+ko03040//Spliceosome
224344	0	0.11	Rbm11	3.45943	0.0695914	0.0468376	GO:0044260//cellular macromolecule metabolic process;GO:0048856//anatomical structure development;GO:0034641//cellular nitrogen compound metabolic process;GO:0050794//regulation of cellular process;GO:0016070//RNA metabolic process;GO:0006397//mRNA processing;GO:0006807//nitrogen compound metabolic process;GO:0006979//response to oxidative stress;GO:0034599//cellular response to oxidative stress;…	K13188//RNA-binding protein 7
633285	0	0.17	Rbm46	4.08746	0.000116019	4.80248e-05	GO:0051253//negative regulation of RNA metabolic process;GO:0048523//negative regulation of cellular process;GO:0048869//cellular developmental process;GO:0031324//negative regulation of cellular metabolic process;GO:0010608//posttranscriptional regulation of gene expression;GO:0010468//regulation of gene expression;GO:0060255//regulation of macromolecule metabolic process;GO:0031323//regulation …	K11972//E3 ubiquitin-protein ligase RNF19A [EC:2.3.2.31];K01876//aspartyl-tRNA synthetase [EC:6.1.1.12]+ko00970//Aminoacyl-tRNA biosynthesis;K13161//heterogeneous nuclear ribonucleoprotein R;K11972//E3 ubiquitin-protein ligase RNF19A [EC:2.3.2.31];K01876//aspartyl-tRNA synthetase [EC:6.1.1.12]+ko00970//Aminoacyl-tRNA biosynthesis;K13161//heterogeneous nuclear ribonucleoprotein R;K11972//E3 ubiqui…
